# Supplementary material for: A Comprehensive Proteomic Survey of ABA-Induced Protein Phosphorylation in Rice (Oryza sativa L.)
Source: Int J Mol Sci. 2017 Jan 3;18(1):60. doi: 10.3390/ijms18010060 (PMC5297695; doi:10.3390/ijms18010060)
Supplement: Supplementary file 1 [file ijms-18-00060-s001.zip › Table S1-S3.xls]

## Sheet: Table S1 ABA DP peptide
Table S1. Differentially phosphorylated peptides during ABA treatment
Sequence	# PSMs	# Proteins	# Protein Groups	Protein Group Accessions	annotation	Modifications	MH+ [Da]	Average 0h intensity	Average 3h intensity	Average 12h intensity	0h-1 intensity	0h-2 intensity	0h-3 intensity	3h-1 intensity	3h-2 intensity	3h-3 intensity	12h-1 intensity	12h-2 intensity	12h-3 intensity	phosphoRS Isoform Probability	phosphoRS Site Probabilities	q-Value	PEP	phosphoRS Binomial Peptide Score	0h-1	IonScore 0h-1	Exp Value 0h-1	0h-2	IonScore 0h-2	Exp Value 0h-2	0h-3	IonScore 0h-3	Exp Value 0h-3	3h-1	IonScore 3h-1	Exp Value 3h-1	3h-2	IonScore 3h-2	Exp Value 3h-2	3h-3	IonScore 3h-3	Exp Value 3h-3	12h-1	IonScore 12h-1	Exp Value 12h-1	12h-2	IonScore 12h-2	Exp Value 12h-2	12h-3
AAAAAAATSPR	38	1	1	LOC_Os03g06170.1	hsp20/alpha crystallin family protein, putative, expressed	N-Term(Acetyl); S9(Phospho)	1079.49	6.93625e+08	0	3.69859e+08	7.10632e+08	6.78879e+08	6.91364e+08				3.87937e+08	3.44906e+08	3.76733e+08	0.99997	T(8): 0.0; S(9): 100.0	0	4.648e-05	458.755	High	25.24	0.225467	High	46.38	0.0017491	High	42.95	0.00386073	High	25.72		High	12.89		High	21.15		High	58.05	0.000119308	High	69.88	7.80778e-06	High
AAAAAASPKPAAQAK	50	1	1	LOC_Os01g41880.1	hyaluronan/mRNA binding family domain containing protein, expressed	S7(Phospho)	1403.71	6.38577e+08	2.4767e+08	3.49188e+08	6.89879e+08	6.07175e+08	6.18677e+08	2.85764e+08	1.92172e+08	2.65074e+08	3.56823e+08	3.00791e+08	3.89951e+08	1	S(7): 100.0	0	1.084e-07	679.505	High	44.12	0.00405071	High	54.78	0.000350789	High	42.68	0.0056244	High	63.62	4.67533e-05	High	71.72	7.03934e-06	High	67.77	1.74128e-05	High	69.13	1.27312e-05	High	70.26	9.83333e-06	High
AAAAAGGGGSPDHELK	11	1	1	LOC_Os10g22070.1	glutathione S-transferase, putative, expressed	N-Term(Acetyl); S10(Phospho)	1530.66	1.05857e+08	0	6.84653e+07	1.08039e+08	1.06728e+08	1.02806e+08				7.25986e+07	6.18631e+07	7.09344e+07	1	S(10): 100.0	0	2.58e-07	530.489	High	45.06	0.0030799	High	27.4	0.17824													High	61.25	8.1476e-05	High	56.23	0.000240614	High
AAAAAKSPASVK	13	1	1	LOC_Os11g06020.1	homeobox domain containing protein, expressed	S7(Phospho)	1151.58	4.33001e+07	0	4.52457e+07	4.40974e+07	4.41438e+07	4.16591e+07			3.32702e+07	7.02533e+07		6.54839e+07	1	S(7): 100.0; S(10): 0.0	0	0.0001283	432.966	High	32.84	0.0603455	High	34.85	0.0366131	High	43.49	0.00519795							High	38.6	0.0160539	High	56.29	0.000270325	High	45.34	0.00336424	High
AAAAEAAAPDAGVSSPQGGGGEK	43	2	1	LOC_Os04g40430.2	surfeit locus protein, putative, expressed	S15(Phospho)	2048.9	6.83562e+07	0	0	9.90056e+07	1.06063e+08								0.999828	S(14): 0.0; S(15): 100.0	0	1.118e-07	420.472	High	18.31	2.71678	High	18.96	2.39249	High	24.63	0.644795	High	30.31		High	23.56		High	29.13		High	38.96	0.0234929	High	35.83	0.0489258	High
AAAAPSPPPVAALEQMSR	15	2	1	LOC_Os01g71300.3	S-formylglutathione hydrolase, putative, expressed	N-Term(Acetyl); S6(Phospho)	1885.89	2.95934e+07	0	4.89688e+07	3.09303e+07	3.01605e+07	2.76895e+07		1.48952e+07		6.25872e+07	3.12223e+07	5.30968e+07	1	S(6): 100.0; S(17): 0.0	0	2.548e-06	370.891	High	35.86	0.0350733	High	40.04	0.0133713	High	28.89	0.179609				High	39.47	0.0152522				High	71.17	1.10451e-05	High	53.13	0.000659082	High
AAAEEAPTSAAGDEVVK	21	1	1	LOC_Os09g38090.1	expressed protein	S9(Phospho)	1695.75	0	1.86709e+08	2.04798e+08				1.88875e+08	1.77724e+08	1.9353e+08	1.95392e+08	1.88354e+08	2.30649e+08	0.990747	T(8): 0.9; S(9): 99.1	0	3.085e-07	380.096	High	49.94	0.00137385	High	34.66	0.0466118	High	53.57	0.000595799	High	41.22	0.0102881	High	49.39	0.00154265	High	38.91	0.0176213	High	32.41		High	32.46		High
AAAENHAPASPVASTAADNPAPAAAGR	29	1	1	LOC_Os02g50880.1	OsDegp3 - Putative Deg protease homologue, expressed	S10(Phospho)	2536.17	1.09278e+09	1.459e+08	6.7339e+08	1032860289	1.15243e+09	1.09304e+09	1.57503e+08	1.17982e+08	1.62214e+08	6.76048e+08	6.56224e+08	6.87896e+08	1	S(10): 100.0; S(14): 0.0; T(15): 0.0	0	1.752e-12	457.447	High	53.28	0.000932035	High	68.9	2.57263e-05	High	72.28	1.18549e-05	High	54.76	0.000667889	High	38.76	0.0269284	High	37.02	0.0395431	High	87.53	3.5206e-07	High	79.11	2.44997e-06	High
AAAGSDEDHSNSPTR	25	1	1	LOC_Os09g15770.1	CPuORF13 - conserved peptide uORF-containing transcript, expressed	S12(Phospho)	1594.62	7.72362e+06	2.77451e+07	1.21835e+07	8.26247e+06	7.04418e+06	7.8642e+06	3.0076e+07	2.4849e+07	2.83101e+07	1.14373e+07	1.11905e+07	1.39227e+07	1	S(5): 0.0; S(10): 0.0; S(12): 100.0; T(14): 0.0	0	1.182e-06	595.513				High	35.69	0.0194777				High	78.84	8.77094e-07	High	75.89	1.80085e-06	High	95.98	1.75256e-08	High	65.14	2.11735e-05	High	82.16	4.35425e-07	High
AAAGSDEDHSNSPTR	7	1	1	LOC_Os09g15770.1	CPuORF13 - conserved peptide uORF-containing transcript, expressed	S5(Phospho); S12(Phospho)	1674.58	0	2.05003e+07	1.64326e+07		9.7868e+06			2.95649e+07	3.1936e+07	1.65025e+07	1.50229e+07	1.77724e+07	1	S(5): 100.0; S(10): 0.0; S(12): 100.0; T(14): 0.0	0	4.853e-06	496.065													High	62.41	2.05821e-05	High	31.95	0.0250199				High	40.06	0.00353088
AAANVVSPLASPR	25	4	1	LOC_Os03g61160.2	expressed protein	S7(Phospho); S11(Phospho)	1412.64	0	1.85846e+09	1.16425e+09				1.9501e+09	1.96276e+09	1.66251e+09	1.21589e+09	1.11822e+09	1.15863e+09	1	S(7): 100.0; S(11): 100.0	0	2.095e-05	520.959	High	27.53	0.254133	High	38	0.0227274	High	48.51	0.00203008	High	62.24	8.59134e-05	High	49.66	0.00155078	High	50.31	0.00133521
AAASEADEEER	19	1	1	LOC_Os01g50450.1	expressed protein	S4(Phospho)	1257.47	0	5.10535e+08	3.4088e+08				5.1571e+08	4.64628e+08	5.51267e+08	3.423e+08	3.47507e+08	3.32833e+08	1	S(4): 100.0	0	0.0002323	371.086	High	43.91	0.00126607	High	54.17	0.000126524	High	54.38	0.000113621	High	46.52	0.000693043	High	50.23	0.000295432	High	42.92	0.00167446
AAASEADEEERK	16	1	1	LOC_Os01g50450.1	expressed protein	S4(Phospho)	1385.56	0	2.70077e+08	2.71266e+08					4.01466e+08	4.08765e+08	2.35666e+08	3.07868e+08	2.70266e+08	1	S(4): 100.0	0	0.0004908	346.902				High	38.09	0.0105873							High	44.68	0.0024203	High	49.7	0.000757028
AAASPPASPPHPK	102	1	1	LOC_Os02g44810.1	tRNA pseudouridine synthase family protein, putative, expressed	N-Term(Acetyl); S4(Phospho); S8(Phospho)	1429.6	1.54731e+08	0	1.26843e+08	1.05699e+08	2.29074e+08	1.2942e+08					2.59562e+08	1.20966e+08	1	S(4): 100.0; S(8): 100.0	0	0.00647	461.789	High	36.79	0.0218835	High	25.46	0.300233	High	50.58	0.00111867	High	33.33		High	25.62		High	32.17		High	43.15	0.00622404	High	52.93	0.000658565	High
AAASSASVASSPR	24	1	1	LOC_Os09g26800.1	polygalacturonase, putative, expressed	S10(Phospho)	1241.56	2.25343e+08	0	1.08713e+08	2.24394e+08	2.28089e+08	2.23545e+08				1.10235e+08	1.00108e+08	1.15796e+08	0.00649627	S(4): 0.0; S(5): 0.0; S(7): 0.0; S(10): 0.6; S(11): 99.4	0	7.187e-06	373.126	High	43.84	0.00353982																High	66.84	1.81241e-05	High	71.85	5.71163e-06	High
AAASSPAAAITCR	40	2	1	LOC_Os02g42520.3	dehydrogenase, putative, expressed	N-Term(Acetyl); S5(Phospho); C12(Carbamidomethyl)	1368.6	1.58172e+08	5.57185e+07	1.30272e+08	2.09093e+08	1.43779e+08	1.21643e+08	4.5055e+07	7.85819e+07	4.35186e+07	1.39695e+08	1.04757e+08	1.46365e+08	0.999998	S(4): 0.0; S(5): 100.0; T(11): 0.0	0	3.635e-05	287.494	High	43.95	0.00438962	High	51.19	0.000820392	High	51.04	0.000825611	High	38.52	0.0151502	High	40.07	0.0106224	High	41.35	0.00798412	High	60.92	8.97287e-05	High	53.61	0.000469482	High
AAASSSGLPSPK	9	2	1	LOC_Os02g51140.2	N-rich protein, putative, expressed	S10(Phospho)	1152.54	5.90663e+07	0	0	5.53373e+07	6.61913e+07	5.56703e+07							1	S(4): 0.0; S(5): 0.0; S(6): 0.0; S(10): 100.0	0	0.0003859	256.297																			High	47.15	0.00152949	High	32.3	0.0491684	High
AAAVDFSPDAAASELLLPVASSPSPR	37	1	1	LOC_Os05g44380.1	MPPN domain containing protein, expressed	S24(Phospho)	2619.28	1.03578e+08	3.53138e+07	1.10151e+08	163499402	3.96212e+07	1.07613e+08	4.11656e+07	2.5524e+07	3.9252e+07	113729559	1.07071e+08	1.09651e+08	0.999786	S(7): 0.0; S(13): 0.0; S(21): 0.0; S(22): 0.0; S(24): 100.0	0	7.23e-12	610.344	High	45.18	0.00594036	High	56.3	0.000462985	High	45.46	0.00547274	High	46.53	0.0043021	High	48.04	0.00307084	High	56.66	0.000418387	High	69.47	2.17203e-05	High	61.89	0.00012121	High
AAAVEHNPGGGHWLAAGLSPQVGSVNR	7	2	1	LOC_Os04g51370.2	protein kinase, putative, expressed	S19(Phospho); S24(Phospho)	2812.27	0	0	9.74216e+07			4.63956e+07				1.07768e+08	9.67854e+07	8.77111e+07	1	S(19): 100.0; S(24): 100.0	0	3.148e-10	504.129	High	23.41	1.01719	High	32.39	0.127667																High	36.99	0.043287	High
AADDLSSPAR	40	1	1	LOC_Os09g24250.1	ubiquitin carboxyl-terminal hydrolase domain containing protein, expressed	S7(Phospho)	1082.45	6.57242e+08	1.40552e+09	9.63217e+08	6.58916e+08	6.19166e+08	6.93645e+08	1.40655e+09	1.34405e+09	1.46596e+09	9.87824e+08	9.23236e+08	9.78591e+08	0.999964	S(6): 0.0; S(7): 100.0	0	0.003228	288.245	High	40.04	0.00449342	High	54.54	0.000159433	High	35.46	0.0128996	High	44.15	0.00174412	High	49.05	0.000564387	High	49.43	0.000517103	High	36.2	0.0118143	High	43.33	0.00214142	High
AADDLSSPAR	29	1	1	LOC_Os09g24250.1	ubiquitin carboxyl-terminal hydrolase domain containing protein, expressed	N-Term(Acetyl); S7(Phospho)	1124.46	1.00958e+08	2.21513e+08	1.3914e+08	1.01055e+08	1.00668e+08	1.0115e+08	2.14904e+08	2.24429e+08	2.25207e+08	1.49043e+08	1.28481e+08	1.39895e+08	0.993016	S(6): 0.7; S(7): 99.3	0	0.0005791	319.937	High	29.86	0.0875782	High	31.74	0.0566722	High	30.29	0.0799304	High	37.64	0.013973	High	41.9	0.00543964	High	45.16	0.0025709	High	40.06	0.00866447	High	52.46	0.000478156	High
AADLQTAAPGSVDGR	8	2	1	LOC_Os11g40100.2	GRF-interacting factor 2, putative, expressed	S11(Phospho)	1508.68	4.19792e+07	1.73416e+07	0	4.07606e+07	4.26571e+07	4.252e+07		2.41929e+07	2.78319e+07			3.09599e+07	1	T(6): 0.0; S(11): 100.0	0	5.2e-05	384.357													High	48.44	0.0021404	High	44.02	0.0058768	High	45.05	0.00523931	High	38.6	0.0207265	High
AAEAQPAPEAQAHGTASSPVQK	42	1	1	LOC_Os12g17310.1	prefoldin, putative, expressed	S18(Phospho)	2226.02	1.33058e+09	0	7.96301e+08	1.39674e+09	1.28934e+09	1.30565e+09				8.78182e+08	7.42073e+08	7.6865e+08	0.999999	T(15): 0.0; S(17): 0.0; S(18): 100.0	0	1.142e-10	674.023	High	28.34	0.239104	High	35.82	0.0428466	High	24.08	0.634335	High	27.31		High	28.27		High	26.79		High	66.81	3.40502e-05	High	49.34	0.00190335	High
AAEMHNVDSDNDREK	3	2	1	LOC_Os02g11750.3	RNA recognition motif containing protein, putative, expressed	S9(Phospho)	1810.71	0	0	1.05765e+08								1.28418e+08	1.88879e+08	1	S(9): 100.0	0	1.055e-10	319.389
AAGDISPLAASPGR	9	4	1	LOC_Os03g61160.2	expressed protein	S11(Phospho)	1362.64	0	3.64358e+08	0				3.62008e+08	3.76191e+08	3.54874e+08				1	S(6): 0.0; S(11): 100.0	0	8.063e-05	370.288							High	18.87	1.52937	High	50.68	0.000977341	High	45	0.00372833	High	43.53	0.00519466
AAGDISPLAASPGR	20	4	1	LOC_Os03g61160.2	expressed protein	S6(Phospho); S11(Phospho)	1442.61	0	1.01419e+09	5.38431e+08				1.02634e+09	1.06302e+09	9.53224e+08	5.69653e+08	4.9452e+08	5.51121e+08	1	S(6): 100.0; S(11): 100.0	0	2.335e-06	595.755	High	46.55	0.0020615	High	42.37	0.00529598	High	31.57	0.0655177	High	58.82	0.000124003	High	72.7	5.05078e-06	High	62.2	5.67009e-05
AAGESGDDEKAER	10	1	1	LOC_Os02g51300.1	AP2 domain containing protein, expressed	S5(Phospho)	1414.55	0	1.27048e+07	7.4974e+06				1.47577e+07	1.22431e+07	1.11137e+07	7.8451e+06	6.75993e+06	7.88717e+06	1	S(5): 100.0	0	5.161e-06	343.178				High	36.69	0.0141645	High	28.86	0.0854861	High	57.32	0.000122148	High	61.09	5.09614e-05	High	45.58	0.00181511
AAGSLPVNIPDWQK	14	1	1	LOC_Os04g43990.1	DUF584 domain containing protein, putative, expressed	S4(Phospho)	1575.76	5.46992e+07	1.15496e+08	5.66853e+07	5.58534e+07	5.52918e+07	5.29524e+07	1.24911e+08	1.121e+08	1.09476e+08	8.60245e+07	8.40313e+07		1	S(4): 100.0	0	2.257e-05	427.33	High	62.43	7.60067e-05	High	69.19	1.6027e-05	High	51.43	0.000937802	High	74.92	4.26953e-06	High	58.03	0.000207215	High	39.59	0.0145234	High	54.17	0.000509348	High	62.2	7.91763e-05	High
AAHVDSPKSPMKPEQHLNPDNELANLGAELGSEDR	9	1	1	LOC_Os05g06980.1	expressed protein	S6(Phospho); S9(Phospho)	3926.75	9.4573e+07	0	0	67421878	1.45746e+08	7.05508e+07	1.76201e+08			2.27367e+08			1	S(6): 100.0; S(9): 100.0; S(32): 0.0	0	2.083e-08	291.083										High	36.51	0.045308	High	27.2					High	67.2	3.87094e-05	High	53.97	0.000811755	High
AANAGMVAGSR	5	1	1	LOC_Os05g08370.1	CESA1 - cellulose synthase, expressed	N-Term(Acetyl); S10(Phospho)	1126.47	2.56736e+07	0	0	2.23645e+07	2.88232e+07	2.58332e+07							1	S(10): 100.0	0	0.0004923	259.944																			High	56.81	0.000132365	High	56.67	0.000140361	High
AANKEPISPGSPSLASGAGK	14	1	1	LOC_Os01g12270.1	hypothetical protein	S11(Phospho)	1918.94	5.08106e+07	0	0	6.91438e+07	4.51103e+07	3.81776e+07							0.999996	S(8): 0.0; S(11): 100.0; S(13): 0.0; S(16): 0.0	0	7.21e-07	309.045																			High	45.58	0.00425279	High	41.84	0.0100749	High
AANSFNNLQYDWKPSQ	7	2	1	LOC_Os11g10070.1	transcriptional corepressor SEUSS, putative, expressed	S4(Phospho)	1962.85	1.02415e+07	0	0	5.58582e+06	1.29711e+07	1.21677e+07							1	S(4): 100.0; Y(10): 0.0; S(15): 0.0	0	4.867e-06	328.411	High	41.02	0.0125876	High	47.79	0.00259659	High	34.29	0.0624873										High	54.41	0.000640989	High	58.22	0.000257404	High
AAPAVAAVAPLAGLPLLSPK	6	1	1	LOC_Os03g49640.1	STE_MEKK_ste11_MAP3K.14 - STE kinases include homologs to sterile 7, sterile 11 and sterile 20 from yeast, expressed	S18(Phospho)	1907.1	1.45155e+07	0	0	6.65737e+06	1.91704e+07	1.77187e+07							1	S(18): 100.0	0	2.582e-08	429.645																			High	52.81	6.67591e-05	High	37.88	0.0018574	High
AASDDTSTSASGDELVADLK	10	1	1	LOC_Os06g15400.1	expressed protein	T8(Phospho)	2032.86	0	1.37046e+07	0				1.74338e+07	1.01406e+07	1.35395e+07				0.495925	S(3): 0.0; T(6): 0.8; S(7): 49.6; T(8): 49.6; S(9): 0.0; S(11): 0.0	0	2.052e-06	288.228	High	18.94	1.75191	High	10.78	11.0091				High	38.78	0.018309	High	42.28	0.0077465	High	56.42	0.000319818
AASDGDDMDIDGQQSSK	6	2	1	LOC_Os06g09570.1	nucleolar GTP-binding protein 1, putative, expressed	S3(Phospho)	1819.67	0	1.96165e+07	2.34799e+07		1.40213e+07		3.1648e+07	2.72017e+07		2.58171e+07	2.5766e+07	1.88566e+07	1	S(3): 100.0; S(15): 0.0; S(16): 0.0	0	6.065e-07	350.713										High	59.08	6.57524e-05	High	40.76	0.00457086							High	51.69	0.000385917
AASFNIIPSSTGAAK	20	8	3	LOC_Os08g03290.3 ;LOC_Os04g40950.2 ;LOC_Os02g38920.1	glyceraldehyde-3-phosphate dehydrogenase, putative, expressed	S3(Phospho)	1514.73	4.42984e+07	0	0	2.30006e+07	4.75801e+07	6.23146e+07				1.40518e+08			1	S(3): 100.0; S(9): 0.0; S(10): 0.0; T(11): 0.0	0	9.556e-07	295.582				High	25.62	0.289921	High	25.81	0.286696										High	40.22	0.00988629	High	37.83	0.0173964	High
AASMAGAPR	14	1	1	LOC_Os06g44050.1	methyladenine glycosylase, putative, expressed	S3(Phospho)	911.382	1.86055e+07	0	3.45229e+07	2.00643e+07	1.79494e+07	1.78028e+07				3.29561e+07	3.57492e+07	3.48635e+07	1	S(3): 100.0	0	0.003349	192.639	High	45.34	0.00140944	High	39.27	0.00570226				High	25.5					High	24.76		High	42.52	0.00269803	High	38.15	0.00735688	High
AASPSSGAGAGAGAGSDPTPR	14	1	1	LOC_Os02g22090.1	pattern formation protein EMB30, putative, expressed	S3(Phospho)	1821.78	1.06569e+08	0	6.61041e+07	1.09124e+08	9.07952e+07	1.19788e+08	4.12527e+07			6.7486e+07	6.19069e+07	6.89195e+07	1	S(3): 100.0; S(5): 0.0; S(6): 0.0; S(16): 0.0; T(19): 0.0	0	1.045e-08	407.604										High	65.28	3.75792e-05							High	73.51	5.66206e-06	High	78.03	1.99975e-06	High
AASYANDISEAESPR	20	1	1	LOC_Os06g13820.1	dynamin, putative, expressed	S13(Phospho)	1660.69	1.13481e+08	4.22067e+07	9.796e+07	1.22309e+08	1.28886e+08	8.9249e+07	4.50139e+07	3.45651e+07	4.70412e+07	9.1134e+07	1.06112e+08	9.66336e+07	1	S(3): 0.0; Y(4): 0.0; S(9): 0.0; S(13): 100.0	0	1.004e-09	452.695	High	97.29	1.75066e-08	High	59.17	0.00011537	High	75.34	2.77941e-06	High	68.75	1.22551e-05	High	39.34	0.0113328	High	60.05	9.24297e-05	High	76.06	2.35851e-06	High	89.37	1.08906e-07	High
AAYEFLAQTPIK	13	2	1	LOC_Os01g72690.1	NAD kinase, putative, expressed	T9(Phospho)	1431.7	4.76022e+07	0	0	4.88479e+07	4.68416e+07	4.71171e+07	2.52186e+07				3.20015e+07		1	Y(3): 0.0; T(9): 100.0	0	7.599e-05	388.985	High	43.04	0.0061205	High	46.34	0.00292665	High	45.06	0.00391265	High	40.05	0.0121987							High	36.95	0.0244222	High	35.89	0.026871	High
ADGPGSPGGGGGSHESGSPR	20	1	1	LOC_Os05g38820.4	histone-like transcription factor and archaeal histone, putative, expressed	N-Term(Acetyl); S6(Phospho); S18(Phospho)	1924.69	6.54671e+07	0	0	7.05852e+07	6.18435e+07	6.39726e+07			4.83207e+07			4.1108e+07	1	S(6): 100.0; S(13): 0.0; S(16): 0.0; S(18): 100.0	0	8.106e-05	614.383				High	23.8	0.187383	High	26.73	0.0910872				High	22.59		High	31.27	0.0335529	High	35.21	0.0129258	High	50.11	0.00042607	High
ADGPGSPGGGGGSHESGSPR	10	1	1	LOC_Os05g38820.4	histone-like transcription factor and archaeal histone, putative, expressed	N-Term(Acetyl); S6(Phospho)	1844.72	2.82862e+07	0	0	3.06575e+07	2.45112e+07	2.96898e+07				2.69195e+07			0.988497	S(6): 98.8; S(13): 1.2; S(16): 0.0; S(18): 0.0	0	9.342e-09	415.791	High	28.34	0.10977	High	38.09	0.011674													High	41.93	0.00479625	High	32.5	0.0431878	High
ADGQNTGNFLTDRPSTK	32	1	1	LOC_Os03g30430.2	nitrilase-associated protein, putative, expressed	S15(Phospho)	1901.85	9.61573e+07	0	0	1.7575e+08	1.12721e+08								0.5	T(6): 0.0; T(11): 0.0; S(15): 50.0; T(16): 50.0	0	2.78e-05	329.399	High	32.73	0.0919736	High	19.97	1.73494	High	21.94	1.08819										High	50.28	0.00161776	High	37.68	0.0295067	High
ADHAAAEAAPQSSQEEEEDWK	12	2	1	LOC_Os02g07720.3	cytidylyltransferase domain containing protein, expressed	N-Term(Acetyl); S12(Phospho); S13(Phospho)	2500.92	3.50764e+07	1.87319e+07	1.1451e+08	8.58602e+07	1.93691e+07			4.3016e+07	1.31796e+07	1.30052e+08	1.14976e+08	9.85031e+07	1	S(12): 100.0; S(13): 100.0	0	3.816e-16	392.981	High	19.69	0.991292				High	29.14	0.102151				High	43.16	0.00357222	High	34.13	0.0312185	High	44.48	0.00294072	High	37.35	0.0152324
ADSGLAFEEERPGLLAR	30	1	1	LOC_Os03g25140.1	peptidyl-prolyl isomerase PASTICCINO1, putative, expressed	S3(Phospho)	1910.91	3.75364e+08	7.80729e+08	4.52878e+08	3.96535e+08	3.88232e+08	3.41325e+08	8.04924e+08	7.85223e+08	7.5204e+08	4.563e+08	4.10695e+08	4.91639e+08	1	S(3): 100.0	0	0.0005116	360.926	High	50.96	0.00119971	High	46.77	0.00316513	High	46.03	0.00374064	High	52.94	0.000762493	High	45.46	0.00426527	High	50.98	0.0011531	High	44.3	0.00541513	High	39.63	0.015735	High
ADSLGVIR	13	1	1	LOC_Os06g46366.1	zinc finger, C3HC4 type, domain containing protein, expressed	S3(Phospho)	910.442	0	2.46265e+07	2.20576e+07			1.64425e+07	3.75687e+07	2.00711e+07	1.62398e+07	2.42626e+07	2.10574e+07	2.08526e+07	1	S(3): 100.0	0	0.001939	234.187	High	27.91	0.161727	High	23.8	0.416036	High	25.82	0.258284	High	37.27	0.0184968	High	43.24	0.00473294	High	43.21	0.00477052							High
ADSPNPSSGDHPAGVGGSPEK	8	1	1	LOC_Os07g39480.1	OsWRKY78 - Superfamily of TFs having WRKY and zinc finger domains, expressed	N-Term(Acetyl); S18(Phospho)	2084.86	3.03725e+07	0	0	31517957	3.18858e+07	2.77137e+07							1	S(3): 0.0; S(7): 0.0; S(8): 0.0; S(18): 100.0	0	5.356e-10	574.567				High	7.13	27.1196													High	58.53	0.000224661	High	39.41	0.018311	High
ADTIDEAVDSSETVPSAR	23	1	1	LOC_Os02g09359.1	BRASSINOSTEROID INSENSITIVE 1-associated receptor kinase 1 precursor, putative, expressed	S10(Phospho)	1942.83	7.78708e+07	1.67393e+08	1.1395e+08	8.05326e+07	7.74582e+07	7.56215e+07	1.7586e+08	1.5841e+08	1.67909e+08	1.22164e+08	1.01876e+08	1.1781e+08	0.989419	T(3): 0.0; S(10): 98.9; S(11): 1.1; T(13): 0.0; S(16): 0.0	0	5.83e-11	395.489	High	52.2	0.000955961	High	70.27	1.48805e-05	High	90.62	1.3737e-07	High	73.32	7.4098e-06	High	75.77	4.2376e-06	High	78.62	2.18404e-06	High	72.6	9.02346e-06	High	77.51	2.92741e-06	High
AEAAPASPTASVPGR	28	1	1	LOC_Os11g43970.1	AAA-type ATPase family protein, putative, expressed	S7(Phospho); S11(Phospho)	1541.64	0	2.32401e+08	0	3.29643e+08			3.74575e+08	3.22628e+08			3.18267e+08		0.999865	S(7): 100.0; T(9): 0.0; S(11): 100.0	0	5.764e-05	446.685	High	33.13	0.0465492	High	32.34	0.0547563	High	34.39	0.0349904	High	46.03	0.00238608	High	47.21	0.00182599	High	23.88		High	36.58	0.0214181	High	30.76		High
AEAPVQSLSATR	12	1	1	LOC_Os03g22690.1	nucleoporin interacting component, putative, expressed	S9(Phospho)	1309.62	2.47208e+07	0	0	3.66291e+07		3.75332e+07							0.98057	S(7): 1.0; S(9): 98.1; T(11): 1.0	0	0.01097	295.884	High	31.93	0.0717514	High	17.04	2.18554	High	33.59	0.0490025										High	35.37	0.0320459	High	27.09		High
AEASSEEAKTEEPK	15	1	1	LOC_Os01g65380.1	patellin protein, putative, expressed	S4(Phospho); S5(Phospho)	1665.63	0	0	3.11041e+07	3.43806e+07					5.08895e+07		5.17354e+07	4.15769e+07	1	S(4): 100.0; S(5): 100.0; T(10): 0.0	0	4.526e-05	408.899				High	30.21	0.052642	High	24.58	0.194024	High	28.11		High	19.32		High	35.69	0.0146352	High	44.63	0.00191114	High	23.2		High
AEDFDSEEEDLLR	14	2	1	LOC_Os03g49420.2	HEAT repeat family protein, putative, expressed	S6(Phospho)	1647.65	9.70364e+07	2.72317e+08	1.61811e+08		1.48886e+08	1.42223e+08	2.84582e+08	2.53191e+08	2.79178e+08	1.70408e+08	1.50171e+08	1.64855e+08	1	S(6): 100.0	0	6.805e-06	441.611	High	75.24	2.42224e-06	High	75.71	2.16707e-06	High	75.77	2.14661e-06	High	75.77	2.12277e-06	High	75.61	3.05841e-06	High	75.37	3.22347e-06				High	61.67	5.44956e-05	High
AEELVGASPGTEGMSSAEAK	11	1	1	LOC_Os09g34060.1	transcription factor RF2a, putative, expressed	S8(Phospho)	2000.85	1.72324e+07	0	1.52118e+07	1.75418e+07	1.69941e+07	1.71613e+07				1.93073e+07		2.6328e+07	0.999998	S(8): 100.0; T(11): 0.0; S(15): 0.0; S(16): 0.0	0	9.775e-09	457.743	High	53.18	0.000571237	High	47.57	0.00208932	High	35.49	0.0433054										High	69.18	1.77066e-05	High	37.17	0.0228609	High
AEENKSGSGDLMASGK	21	2	1	LOC_Os10g18340.1	expressed protein	N-Term(Acetyl); S8(Phospho)	1702.7	6.35047e+07	0	8.47778e+07	6.36799e+07	6.16534e+07	6.51809e+07				8.48993e+07	8.14832e+07	8.7951e+07	0.991844	S(6): 0.8; S(8): 99.2; S(14): 0.0	0	1.765e-05	451.846	High	58.07	0.000162973	High	56.79	0.000217264	High	73.38	4.73663e-06										High	57.53	0.000183226	High	59.24	0.000121388	High
AEFPSSHEQPAADNVASSPPPK	167	1	1	LOC_Os01g42830.1	adaptin ear-binding coat-associated protein 2, putative, expressed	S18(Phospho)	2343.03	3.28721e+08	1.78096e+07	1.51795e+08	3.30299e+08	4.4118e+08	2.14683e+08	8.89746e+06	4.45315e+07		9.61993e+07	2.02532e+08	1.56653e+08	0.999998	S(5): 0.0; S(6): 0.0; S(17): 0.0; S(18): 100.0	0	3.468e-11	448.304	High	61.99	0.000111273	High	59.06	0.00022058	High	58.5	0.000250725	High	56.85	0.000387775	High	57.65	0.00032185	High	55.84	0.000456077	High	59.21	0.000228984	High	61.15	0.000143995	High
AEGPSALHNPSASMR	8	3	1	LOC_Os07g05610.4	zinc ion binding protein, putative, expressed	S13(Phospho)	1604.7	3.94129e+07	0	0	6.24788e+07	5.57599e+07								1	S(5): 0.0; S(11): 0.0; S(13): 100.0	0	7.157e-06	462.364																			High	47.55	0.00219213	High	56.54	0.00027062	High
AELSDGEKGGSEK	15	1	1	LOC_Os03g25450.1	h/ACA ribonucleoprotein complex subunit 4, putative, expressed	S4(Phospho)	1386.58	0	0	2.23889e+08			4.75178e+07				2.13704e+08	2.32853e+08	2.25111e+08	1	S(4): 100.0; S(11): 0.0	0	4.581e-09	299.837				High	15.65	2.45315	High	10.27	8.22258	High	27.18		High	15.94		High	20.6								High
AEQPTGHNSSDQDELR	30	1	1	LOC_Os03g51520.2	fip1 motif family protein, expressed	S10(Phospho)	1863.76	1.64652e+07	3.6337e+07	4.2465e+07	1.70754e+07	1.59612e+07	1.6359e+07	3.5485e+07	3.39929e+07	3.95331e+07	4.52421e+07	3.3449e+07	4.8704e+07	0.5	T(5): 0.0; S(9): 50.0; S(10): 50.0	0	9.444e-07	442.592				High	36.86	0.0201014				High	35.15	0.0302284	High	47.47	0.0017736	High	42.39	0.00577632	High	54.7	0.000338844	High	56.57	0.000221725	High
AEQTEQAGTQAGIVDGK	5	4	1	LOC_Os03g62750.2	inner membrane protein, putative, expressed	T9(Phospho)	1782.79	0	2.64626e+07	0				2.38739e+07	2.76575e+07	2.78565e+07				1	T(4): 0.0; T(9): 100.0	0	1.614e-05	373.717										High	53.98	0.000545925	High	60.26	0.000133136	High	62.2	8.55635e-05				High	18.68
AESEGEAEGTTETHDVEGGISLPLSER	14	1	1	LOC_Os01g01960.1	transcriptional repressor, putative, expressed	S3(Phospho)	2880.25	0	9.43314e+07	7.38889e+07			7.96185e+07	1.50497e+08		1.32497e+08		1.14185e+08	1.07481e+08	1	S(3): 100.0; T(10): 0.0; T(11): 0.0; T(13): 0.0; S(21): 0.0; S(25): 0.0	0	1.387e-06	413.384	High	48.68	0.00248813	High	33.08	0.0894528	High	36.98	0.0337854	High	59.02	0.000235403	High	35.09		High	47.44	0.00335542	High	30.49		High	35.45		High
AESGIMTAETGTYR	13	1	1	LOC_Os06g50920.1	protein kinase family protein, putative, expressed	T7(Phospho)	1566.65	0	4.69139e+07	7.00335e+07				5.04914e+07	4.56714e+07	4.45791e+07	8.029e+07	5.79538e+07	7.18566e+07	1	S(3): 0.0; T(7): 100.0; T(10): 0.0; T(12): 0.0; Y(13): 0.0	0	4.004e-06	409.339	High	50.35	0.000898123	High	39.97	0.00987297	High	56.43	0.000222846	High	41.92	0.00553997	High	43.31	0.0040436	High	44.04	0.00372368	High	30.91
AESPTASSIYGK	30	1	1	LOC_Os06g51250.1	EF hand family protein, putative, expressed	S3(Phospho)	1290.57	8.2148e+08	2.71891e+08	4.68092e+08	8.21497e+08	7.97363e+08	8.45579e+08	2.79869e+08	2.64669e+08	2.71136e+08	4.92281e+08	4.26301e+08	4.85693e+08	1	S(3): 100.0; T(5): 0.0; S(7): 0.0; S(8): 0.0; Y(10): 0.0	0	1.559e-05	350.209	High	51.03	0.000590462	High	78.09	1.2714e-06	High	80.28	7.01765e-07	High	53.91	0.00030341	High	56.76	0.000159307	High	58.02	0.000119346	High	61.3	6.18253e-05	High	66.47	1.82255e-05	High
AETVVSPK	22	2	1	LOC_Os01g06270.2	expressed protein	S6(Phospho)	910.431	7.92717e+07	0	5.97498e+07	75253373	7.10046e+07	9.15572e+07	1.25795e+08			8.76587e+07		9.15907e+07	1	T(3): 0.0; S(6): 100.0	0	0.007118	228.935	High	32.72	0.0537504	High	33.1	0.0308071	High	33.05	0.0498175	High	37.06	0.0197871	High	28.26		High	30.83		High	45.3	0.00182975	High	37.52	0.011072	High
AETVVSPKSPAKPDQPLDLDSELAK	21	2	1	LOC_Os01g06270.2	expressed protein	S6(Phospho); S9(Phospho)	2795.32	0	4.1674e+08	0		4.66996e+08		4.68596e+08	4.77776e+08	3.03848e+08			2.62994e+08	1	T(3): 0.0; S(6): 100.0; S(9): 100.0; S(21): 0.0	0	3.635e-09	417.65	High	32.35	0.119651	High	22.07	1.3119	High	30.96	0.16719	High	41.12	0.0164581	High	44.32	0.00769243	High	38.59	0.0283216	High	24.91		High	43.35	0.00963602	High
AETVVSPKSPAKPDQPLDLDSELAK	17	2	1	LOC_Os01g06270.2	expressed protein	S9(Phospho)	2715.37	6.71407e+07	1.79205e+07	0	64920007	6.2205e+07	7.42972e+07		1.97429e+07	3.40187e+07		7.57635e+07		0.999993	T(3): 0.0; S(6): 0.0; S(9): 100.0; S(21): 0.0	0	3.872e-09	416.597	High	39.78	0.016905	High	33.55	0.0669421	High	44.31	0.00563805	High	28.49		High	38.04	0.023155	High	44.01	0.00585858	High	41.12	0.0117332	High	47.56	0.00265187	High
AFDSPEGEK	28	2	1	LOC_Os12g42550.2	methyl-CpG binding domain containing protein, putative, expressed	S4(Phospho)	1059.41	3.91393e+08	2.50932e+08	1.88638e+08	4.10098e+08	3.69049e+08	3.95033e+08	2.49059e+08	2.42507e+08	2.61229e+08	2.07212e+08	1.74967e+08	1.83735e+08	1	S(4): 100.0	0	0.0002482	372.828	High	43.09	0.00169609	High	42.58	0.00195711	High	41.7	0.00239671	High	38.29	0.00525553	High	30.88	0.0289478	High	36.6	0.00775561	High	42.84	0.00184339	High	33.86	0.0159526	High
AFHYPDHGLAMDPSSAAASSPNPSFSPGGGGGGGVGGGER	20	2	1	LOC_Os02g08544.2	homeobox protein knotted-1, putative, expressed	N-Term(Acetyl); S26(Phospho)	3834.64	1.64089e+08	0	0	1.71679e+08	1.55377e+08	1.6521e+08				6.02199e+07			1	Y(4): 0.0; S(14): 0.0; S(15): 0.0; S(19): 0.0; S(20): 0.0; S(24): 0.0; S(26): 100.0	0	3.803e-15	540.774																			High	59.89	0.00021113	High	49.6	0.00224997	High
AFLAAAASSPR	6	2	1	LOC_Os03g13190.2	transposon protein, putative, unclassified, expressed	S9(Phospho)	1141.54	4.24107e+07	0	0	4.16319e+07	4.09214e+07	4.46788e+07							0.999943	S(8): 0.0; S(9): 100.0	0	1.624e-05	364.07																			High	59.46	0.000104294	High	47.2	0.00175588	High
AFSGLGGLGVDEPAMVSALAK	11	1	1	LOC_Os05g31750.1	annexin, putative, expressed	S3(Phospho)	2070.01	3.40728e+07	0	1.41074e+07	3.41388e+07	3.37096e+07	3.43699e+07				1.20417e+07	2.10789e+07	9.20154e+06	1	S(3): 100.0; S(17): 0.0	0	9.869e-10	446.684																			High	47.43	0.00297822	High	54.92	0.000475108	High
AFSLDNAR	9	1	1	LOC_Os05g05950.1	TOC159, putative, expressed	S3(Phospho)	973.419	1.54969e+07	0	1.18597e+07	1.66893e+07	1.21527e+07	1.76487e+07					2.3187e+07	1.2392e+07	1	S(3): 100.0	0	0.003837	224.572				High	32.82	0.0385528	High	35.48	0.0212071										High	32.7	0.0396598	High	41.42	0.00533259	High
AGDHAAESDLGYDFGEESVRSPSSAGR	60	1	1	LOC_Os03g03830.1	EF hand family protein, putative, expressed	S21(Phospho)	2847.2	3.61531e+08	0	0	536767270		5.47824e+08					5.90402e+08		0.331496	S(8): 0.0; Y(12): 0.0; S(18): 0.6; S(21): 33.1; S(23): 33.1; S(24): 33.1	0	2.338e-10	416.109	High	45.29	0.00588349	High	41.98	0.0126362	High	42.21	0.0122369	High	29.56		High	25.22		High	31.28		High	51.61	0.00137427	High	30		High
AGGGESEGNAGSPSLGSAR	11	1	1	LOC_Os09g32540.1	expressed protein	S12(Phospho)	1740.72	7.31646e+07	0	0	68600413	7.29898e+07	7.79035e+07				3.94752e+07			1	S(6): 0.0; S(12): 100.0; S(14): 0.0; S(17): 0.0	0	3.396e-09	458.943																			High	95.82	2.42313e-08	High	65.35	2.54254e-05	High
AGGGGGGGSPSPVAASAAPVQVR	5	1	1	LOC_Os08g12680.1	zinc finger domain, LSD1 subclass family protein, expressed	S9(Phospho)	1986.94	2.72677e+07	0	0	19274268	3.8332e+07	2.41969e+07							1	S(9): 100.0; S(11): 0.0; S(16): 0.0	0	1.763e-08	408.829																			High	58.73	0.000187622	High	63.67	5.71713e-05	High
AGGVGVAPPSPSPSEGK	12	2	1	LOC_Os03g03440.2	expressed protein	S10(Phospho)	1573.73	0	0	2.1959e+07							3.07563e+07		3.51209e+07	0.497189	S(10): 49.7; S(12): 49.7; S(14): 0.6	0	6.642e-05	332.462	High	11.13	12.1571	High	46.77	0.00338077	High	37.78	0.026751	High	24.76					High	28.87					High	29.89		High
AGGVSDGGAAHGASGR	13	2	1	LOC_Os03g37640.2	MATE efflux family protein, putative, expressed	S14(Phospho)	1406.58	3.09697e+07	1.04401e+08	4.1541e+07	33159951	3.00955e+07	2.96537e+07	1.10149e+08	8.40498e+07	1.19004e+08	5.21921e+07	7.24308e+07		1	S(5): 0.0; S(14): 100.0	0	4.299e-07	549.025				High	47.06	0.00167762	High	51.2	0.000652756	High	57.06	0.000169829	High	80.08	8.46267e-07	High	52.04	0.000569845	High	38.37	0.0125242	High	50.01	0.000860017	High
AGGVSDGGAAHGASGR	13	2	1	LOC_Os03g37640.2	MATE efflux family protein, putative, expressed	N-Term(Acetyl); S14(Phospho)	1448.59	1.92696e+07	4.60984e+07	2.99524e+07	18225172	1.93849e+07	2.01987e+07	4.90739e+07	4.02039e+07	4.90173e+07	2.94044e+07	2.67143e+07	3.37387e+07	1	S(5): 0.0; S(14): 100.0	0	0.0001916	446.441	High	24.47	0.451593							High	47.43	0.00156772	High	33.23	0.0412353	High	48.94	0.00139132	High	44.14	0.00335366	High	60.01	8.67999e-05	High
AGLQQQQQQQPGTPGR	62	1	1	LOC_Os02g54600.1	STE_MEK_ste7_MAP2K.5 - STE kinases include homologs to sterile 7, sterile 11 and sterile 20 from yeast, expressed	T13(Phospho)	1801.84	5.30008e+08	2.31418e+08	3.50109e+08	530751702	4.96543e+08	5.62731e+08	2.28643e+08	2.22516e+08	2.43096e+08	3.92572e+08	3.07761e+08	3.49995e+08	1	T(13): 100.0	0	7.347e-07	429.08	High	65.37	4.06708e-05	High	66.85	2.843e-05	High	67.69	2.34728e-05	High	47.81	0.00232636	High	55.98	0.000348871	High	59.37	0.000159659	High	67.39	2.51698e-05	High	66.72	2.93896e-05	High
AGMPAAEQAIQGESTSPCK	31	1	1	LOC_Os04g55230.1	tetratricopeptide repeat domain containing protein, putative, expressed	S16(Phospho); C18(Carbamidomethyl)	2012.85	3.82362e+07	0	0	5.65261e+07	5.81826e+07								0.999998	S(14): 0.0; T(15): 0.0; S(16): 100.0	0	4.123e-07	409.745																			High	38.56	0.0203053	High	38.62	0.0204389	High
AGRPGGDAHASESGTGR	47	1	1	LOC_Os01g72940.1	phosphatidylserine decarboxylase, putative, expressed	S13(Phospho)	1662.7	1.40295e+08	0	0	208730468	2.12155e+08							8.58232e+07	0.999999	S(11): 0.0; S(13): 100.0; T(15): 0.0	0	9.395e-06	423.704	High	40.14	0.00964889	High	20.93	0.791898	High	34.46	0.0361319	High	13.32		High	31.09		High	31.4		High	38.63	0.0133935	High	36.66	0.0211351	High
AGSDDVGEWPNPTTPGASK	37	1	1	LOC_Os05g02500.1	dual specificity protein phosphatase, putative, expressed	T14(Phospho)	1965.83	5.07795e+07	5.17212e+07	0	1.07713e+08	4.4625e+07		3.80405e+07	9.12492e+07	2.5874e+07				0.999552	S(3): 0.0; T(13): 0.0; T(14): 100.0; S(18): 0.0	0	3.816e-16	310.302	High	38.65	0.018108	High	29.35	0.148491	High	32.6	0.0708358	High	38.82	0.0169339	High	35.78	0.033519	High	39.26	0.0152846	High	38.83	0.016607	High	40.33	0.0120395	High
AGSEGLYSAGYSQR	22	1	1	LOC_Os09g34070.2	RNA recognition motif containing protein, expressed	S3(Phospho)	1525.64	2.26287e+08	1.15002e+08	2.37541e+08	233935996	2.25099e+08	2.19826e+08	1.12304e+08	1.24366e+08	1.08336e+08	2.59419e+08	2.15573e+08	2.3763e+08	1	S(3): 100.0; Y(7): 0.0; S(8): 0.0; Y(11): 0.0; S(12): 0.0	0	8.041e-06	316.732	High	66.15	1.93643e-05	High	67.36	1.528e-05	High	62.41	4.75368e-05	High	62.11	4.89066e-05	High	62.9	4.21828e-05	High	60.74	6.68343e-05	High	72.11	5.05983e-06	High	67.93	1.32476e-05	High
AGSMSSEISTFK	5	2	1	LOC_Os02g43050.1	kinesin motor domain containing protein, expressed	S3(Phospho)	1324.55	7.49945e+06	0	0	12351787	1.01466e+07								1	S(3): 100.0; S(5): 0.0; S(6): 0.0; S(9): 0.0; T(10): 0.0	0	4.279e-05	340.657							High	9.71	12.2407										High	43.44	0.00532155	High	48.15	0.00178295	High
AHGTAVGLPSDDDMGNSEVGHNALGAGR	20	2	1	LOC_Os05g40420.3	2,3-bisphosphoglycerate-independent phosphoglycerate mutase, putative, expressed	S17(Phospho)	2785.21	1.33057e+08	0	0		1.72693e+08	2.26479e+08					1.08653e+08		1	T(4): 0.0; S(10): 0.0; S(17): 100.0	0	5.652e-11	425.23	High	45.89	0.00526085	High	35.32	0.0601924	High	30.61	0.181048										High	19.98		High	43.51	0.00914264	High
AHGTAVGLPSEDDMGNSEVGHNALGAGR	56	1	1	LOC_Os01g60190.1	2,3-bisphosphoglycerate-independent phosphoglycerate mutase, putative, expressed	S17(Phospho)	2799.22	1.46671e+09	3.85633e+08	1.0449e+09	1606299159	1.27267e+09	1.52116e+09	4.26068e+08	4.20693e+08	3.10138e+08	1.03125e+09	1.0901e+09	1.01335e+09	1	T(4): 0.0; S(10): 0.0; S(17): 100.0	0	1.947e-11	587.973	High	65.29	5.54479e-05	High	64.92	6.03789e-05	High	63.44	8.49183e-05	High	56.17	0.000452778	High	57.44	0.000345639	High	57.74	0.000347388	High	58.28	0.00027735	High	67.13	3.99193e-05	High
AHGTAVGLPSEDDMGNSEVGHNALGAGR	23	1	1	LOC_Os01g60190.1	2,3-bisphosphoglycerate-independent phosphoglycerate mutase, putative, expressed	M14(Oxidation); S17(Phospho)	2815.22	1.92456e+08	0	2.16322e+08	1.98381e+08	1.8411e+08	1.94876e+08				2.12746e+08	1.95333e+08	2.40889e+08	1	T(4): 0.0; S(10): 0.0; S(17): 100.0	0	3.442e-10	428.782	High	44.34	0.00661896	High	43.2	0.00938354	High	44.25	0.00682709	High	29.22		High	32.31					High	49.28	0.00231343	High	49.53	0.00218402	High
AHNKDDVDGSFGSPDHGEAVEK	22	2	1	LOC_Os05g03120.3	retrotransposon protein, putative, unclassified, expressed	S13(Phospho)	2391	1.30414e+08	0	0	191996796	1.99245e+08					1.47451e+08			1	S(10): 0.0; S(13): 100.0	0	3.465e-07	442.441	High	26.12	0.388628	High	31.49	0.113497	High	25.81	0.416332	High	12.55		High	4.94		High	26.02		High	48.09	0.00247528	High	36.59	0.0348766	High
AHNKNSFSVAR	15	1	1	LOC_Os10g39430.1	expressed protein	S6(Phospho)	1310.6	0	0	4.3688e+07	7.03951e+07						6.85693e+07		6.24947e+07	0.987512	S(6): 98.8; S(8): 1.2	0	0.001881	221.402	High	38.86	0.0140093	High	31.12	0.0832177	High	32.07	0.0668676	High	30.69					High	28.26		High	36.52	0.0244571	High	30.2		High
AILEGGSDDEGASTEAHGR	56	1	1	LOC_Os03g51140.1	HEAT repeat family protein, putative, expressed	S7(Phospho)	1951.8	7.05661e+08	1.91378e+09	1.22239e+09	7.11515e+08	7.22492e+08	6.82975e+08	2.41323e+09	1.69109e+09	1.63702e+09	1.22381e+09	1.20441e+09	1.23894e+09	1	S(7): 100.0; S(13): 0.0; T(14): 0.0	0	3.047e-10	559.586	High	142.94	5.76761e-13	High	134.75	3.77004e-12	High	128.18	1.7243e-11	High	119.96	1.13238e-10	High	95.16	3.43193e-08	High	119.81	1.17322e-10	High	98.53	1.57957e-08	High	103.19	5.44258e-09	High
AIQESLNVESPPR	6	1	1	LOC_Os06g08400.1	LIM domain-containing protein, putative, expressed	S10(Phospho)	1519.72	0	2.25133e+07	0		5.08588e+07		2.56185e+07	4.19214e+07		5.24182e+07			1	S(5): 0.0; S(10): 100.0	0	5.866e-05	372.328	High	28.63	0.162861	High	17.51	1.87975				High	40.62	0.00937619	High	52.08	0.000666828							High	47.04	0.00212821
AISSSQFFGNQSR	13	2	1	LOC_Os03g63710.1	GTPase-activating protein, putative, expressed	S3(Phospho)	1508.66	4.06886e+07	1.37024e+07	2.76695e+07		5.69641e+07	6.51015e+07	1.61937e+07	2.49134e+07			4.61224e+07	3.6886e+07	0.999999	S(3): 100.0; S(4): 0.0; S(5): 0.0; S(12): 0.0	0	6.377e-05	370.326	High	31.58	0.1054				High	49.45	0.00173089	High	52.26	0.000890844	High	52.86	0.000786504	High	33.7					High	57.97	0.000242015	High
AIYPDPTFAQSTR	20	1	1	LOC_Os11g31950.1	expressed protein	S11(Phospho)	1546.69	1.19452e+08	0	1.0669e+08	1.23082e+08	1.15171e+08	1.20103e+08	6.86271e+07			1.08155e+08	1.05141e+08	1.06773e+08	0.994846	Y(3): 0.0; T(7): 0.0; S(11): 99.5; T(12): 0.5	0	0.003591	499.828	High	43.94	0.00445019	High	46.82	0.00229079	High	37.21	0.0206457	High	40.78	0.00920835				High	25.63		High	46.21	0.00262427	High	51.86	0.000711578	High
AKAEDFDSEEEDLLR	4	2	1	LOC_Os03g49420.2	HEAT repeat family protein, putative, expressed	S8(Phospho)	1846.78	0	0	1.53785e+07	16121301				2.90386e+07		2.37348e+07	2.24007e+07		1	S(8): 100.0	0	2.078e-06	439.107													High	48.69	0.00147646				High	41.95	0.0072794
AKSSDSIEPPSQPVETTDEAK	86	1	1	LOC_Os05g28190.1	ranBP1 domain containing protein, expressed	S3(Phospho); S6(Phospho)	2375.99	0	1.50857e+08	1.22899e+08				2.6121e+08		1.91361e+08		1.64426e+08	2.0427e+08	0.985855	S(3): 98.6; S(4): 1.4; S(6): 100.0; S(11): 0.0; T(16): 0.0; T(17): 0.0	0	3.816e-16	436.014	High	40.99	0.0123882	High	16.61	3.42579	High	17.72	2.60581	High	40.91	0.0122536	High	27.17		High	39.21	0.0189461	High	27.1		High	30.72		High
ALAYAFSHQWK	13	3	2	LOC_Os01g61720.6 ;LOC_Os05g03190.1	IQ calmodulin-binding motif domain containing protein, expressed	S7(Phospho)	1401.64	5.75174e+07	0	4.52703e+07	6.13688e+07	5.70906e+07	5.40929e+07				5.72677e+07	3.57138e+07	4.28293e+07	1	Y(4): 0.0; S(7): 100.0	0	5.507e-06	432.422				High	34.94	0.0299786													High	48.79	0.00127373	High	40.82	0.00797308	High
ALDADNSPHAPSMSEEEINALPVFK	13	2	1	LOC_Os03g16570.3	zinc finger, C3HC4 type domain containing protein, expressed	S7(Phospho)	2762.25	3.3905e+07	4.57207e+07	0	5.39621e+07	4.77529e+07		3.11816e+07	7.66075e+07	2.93731e+07				1	S(7): 100.0; S(12): 0.0; S(14): 0.0	0	7.465e-09	379.649	High	51.69	0.00159246	High	43.7	0.00976441	High	26.4	0.52541	High	40.23	0.0218705	High	40.51	0.0208562	High	41.18	0.0175545	High	45.75	0.00575382	High	53.93	0.000949944
ALEDGSDSDASAELDEK	6	1	1	LOC_Os01g73950.1	PPR repeat containing protein, expressed	S6(Phospho)	1831.71	0	0	3.11352e+07		1.91745e+07				5.31613e+07	6.27728e+07		3.06328e+07	0.999905	S(6): 100.0; S(8): 0.0; S(11): 0.0	0	3.816e-16	349.428																High	42.31	0.00489966				High	87.28	1.4928e-07
ALIAEGSCGSPR	6	1	1	LOC_Os09g29070.1	glucose-6-phosphate isomerase, putative, expressed	C8(Carbamidomethyl); S10(Phospho)	1297.56	3.1542e+08	0	0	299267400	3.26549e+08	3.20443e+08						2.90405e+08	1	S(7): 0.0; S(10): 100.0	0	1.267e-06	432.982																			High	67.1	1.51893e-05	High	55.41	0.000223286	High
ALLLQEQPTSPSDGSSR	8	1	1	LOC_Os09g33600.1	ARF GTPase-activating domain-containing protein, putative, expressed	S10(Phospho)	1865.87	8.63473e+07	0	0	1.25784e+08	1.33258e+08							1.10559e+08	0.999768	T(9): 0.0; S(10): 100.0; S(12): 0.0; S(15): 0.0; S(16): 0.0	0	8.872e-07	382.489	High	24.96	0.49405	High	21.59	1.06025													High	54.49	0.00054625	High	37.08	0.0300193
ALLSPLPSPR	29	1	1	LOC_Os05g38950.2	TBC domain containing protein, expressed	S8(Phospho)	1130.6	5.39816e+07	0	0		6.56123e+07	9.63324e+07				6.36628e+07			1	S(4): 0.0; S(8): 100.0	0	0.00505	292.61	High	31.32	0.0630539	High	37.91	0.0138265	High	36.85	0.01769	High	26.48		High	24.57		High	25.52		High	24.22		High	42.31	0.00518166	High
ALLSPLPSPR	47	1	1	LOC_Os05g38950.2	TBC domain containing protein, expressed	S4(Phospho); S8(Phospho)	1210.57	0	0	4.10329e+08								4.61554e+08	7.69433e+08	1	S(4): 100.0; S(8): 100.0	0	0.002467	393.378	High	31.88	0.0627229	High	31.93	0.062005	High	34.84	0.0314479	High	31.75		High	28.96		High	28.55		High	32.62		High	32.04		High
ALLSSYSQTPR	24	1	1	LOC_Os04g28090.1	MYB family transcription factor, putative, expressed	T9(Phospho)	1302.61	4.554e+07	0	4.9679e+07		6.90285e+07	6.75915e+07				7.58992e+07		7.31377e+07	0.992798	S(4): 0.0; S(5): 0.0; Y(6): 0.0; S(7): 0.7; T(9): 99.3	0	0.005121	319.615	High	25.82	0.305411				High	14.5	4.15309	High	21.59		High	15.89		High	31.59		High	24.47		High	37.54	0.0207825	High
ALPGMPDPDAEVIALSPK	15	1	1	LOC_Os03g10140.1	ZOS3-04 - C2H2 zinc finger protein, expressed	S16(Phospho)	1900.92	0	0	1.13167e+08							1.74118e+08		1.65381e+08	1	S(16): 100.0	0	5.379e-07	586.155	High	22.57	0.770263	High	11.9	8.97782	High	17.51	2.45903	High	33.94		High	23.93		High	24.76		High	22.36		High	20.52		High
ALSAAGSFGK	57	2	1	LOC_Os01g27990.2	NPL4, putative, expressed	S7(Phospho)	988.453	1.047e+09	4.71613e+08	8.80862e+08	1.08648e+09	1.04539e+09	1.00913e+09	4.83165e+08	4.4637e+08	4.85302e+08	9.37034e+08	8.55896e+08	8.49656e+08	1	S(3): 0.0; S(7): 100.0	0	0.01174	235.119	High	44.91	0.0019484	High	49.84	0.000635486	High	56.02	0.000150896	High	44.91	0.0019371	High	45.19	0.00178437	High	44.88	0.00192127	High	44.32	0.00224116	High	48.75	0.000808114	High
ALSASAADDPDQDDDLHRPSSPAQASR	56	1	1	LOC_Os01g01150.2	RNA recognition motif, putative, expressed	S21(Phospho)	2873.24	0	0	5.32048e+08	1.31824e+09					4.98882e+08		7.3935e+08	8.56793e+08	0.333333	S(3): 0.0; S(5): 0.0; S(20): 33.3; S(21): 33.3; S(26): 33.3	0	3.521e-10	400.847	High	36.69	0.0413256	High	32.74	0.101925	High	24.84	0.647824	High	33.21		High	28.43		High	39.65	0.0215864	High	36.27	0.0462654	High	34.45		High
ALSFSVSR	10	1	1	LOC_Os02g01930.1	expressed protein	S3(Phospho)	946.441	1.11252e+07	0	0	1.55616e+07	6.61789e+06	1.11962e+07	1.30683e+07						1	S(3): 100.0; S(5): 0.0; S(7): 0.0	0	0.009324	212.111				High	17.74	0.94398				High	33.76	0.0257064				High	19.56		High	33	0.0300712	High	35.58	0.0161451	High
ALSHGVEVENSSSK	13	1	1	LOC_Os06g40460.1	expressed protein	S3(Phospho)	1523.67	2.51471e+07	0	2.66988e+07	2.4845e+07	2.62778e+07	2.43185e+07		2.30768e+07		3.15763e+07	2.28286e+07	2.56915e+07	1	S(3): 100.0; S(11): 0.0; S(12): 0.0; S(13): 0.0	0	4.551e-14	297.72	High	35.27	0.0284388	High	29.75	0.100152	High	29.78	0.101567				High	33.51	0.0418694				High	54.92	0.000295372	High	54.75	0.000320059	High
ALSLNSPR	18	1	1	LOC_Os07g46670.2	early response to dehydration 15, putative, expressed	S3(Phospho)	937.455	1.32009e+08	4.61254e+07	6.07245e+07	1.62148e+08	1.55606e+08	7.82741e+07	4.72161e+07	4.64911e+07	4.4669e+07	6.36427e+07	5.51089e+07	6.3422e+07	1	S(3): 100.0; S(6): 0.0	0	0.01292	215.612	High	35.65	0.0173436	High	24	0.264542	High	33.79	0.0319013	High	37.59	0.0132987	High	39.23	0.00913998	High	43.93	0.00266211	High	44.53	0.0023186	High	50.31	0.000710901	High
ALSLVSPK	23	2	1	LOC_Os01g19500.1	hypothetical protein	S6(Phospho)	894.473	8.26702e+07	0	0	8.39985e+07	1.64012e+08						1.12867e+08		1	S(3): 0.0; S(6): 100.0	0	0.003984	239.945										High	7.04		High	5.42					High	31.35	0.0386199	High	31.87	0.0341968	High
ALTAVQLTSR	11	1	1	LOC_Os01g11040.1	SCAR-like protein 2, putative, expressed	T3(Phospho)	1139.58	3.48032e+07	0	4.74288e+07	36666880	3.59916e+07	3.17511e+07				5.59985e+07	4.50733e+07	4.12148e+07	1	T(3): 100.0; T(8): 0.0; S(9): 0.0	0	6.485e-05	319.937	High	36.09	0.0192155	High	43.2	0.00364955	High	31.92	0.0493263	High	29.3								High	45.39	0.00220414	High	53.3	0.000347527	High
ALVGAFETVMSFKE	6	1	1	LOC_Os04g21710.1	expressed protein	S11(Phospho)	1608.76	4.34098e+06	0	0	3.32565e+06	6.89566e+06	2.80164e+06							0.989305	T(8): 1.1; S(11): 98.9	0	0.001326	233.794																			High	36.84	0.035151	High	56.68	0.000364916	High
AMELSGPR	3	1	1	LOC_Os04g38480.1	BRASSINOSTEROID INSENSITIVE 1-associated receptor kinase 1 precursor, putative, expressed	S5(Phospho)	940.4	6.80987e+07	0	0	7.08087e+07	6.74728e+07	6.60146e+07							1	S(5): 100.0	0	0.008504	178.932																			High	39.81	0.0147253	High	42.92	0.0069199	High
AMNKPAEYDSDDEIIATSR	26	2	1	LOC_Os08g18044.1	tetraspanin family protein, putative, expressed	S10(Phospho)	2205.94	8.00652e+07	2.50552e+08	1.42287e+08	8.51463e+07	6.4166e+07	9.08833e+07	2.9331e+08	2.29395e+08	2.28952e+08	1.65634e+08	1.16236e+08	1.44991e+08	1	Y(8): 0.0; S(10): 100.0; T(17): 0.0; S(18): 0.0	0	6.723e-09	588.565	High	48.05	0.0023893	High	48.19	0.0023044	High	59.01	0.000190665	High	64.88	4.96733e-05	High	68.61	2.12779e-05	High	75.13	4.70941e-06	High	69.16	1.86195e-05	High	64.43	5.43212e-05	High
AMSAAQDSECNEDDR	5	1	1	LOC_Os07g25680.1	protein kinase domain containing protein, expressed	S8(Phospho); C10(Carbamidomethyl)	1778.6	6.62916e+06	0	0	5.50283e+06	7.84339e+06	6.54126e+06							1	S(3): 0.0; S(8): 100.0	0	2.679e-05	381.838																			High	37.5	0.00617952	High	45.38	0.000947431	High
ANDCNLHISGGR	10	1	1	LOC_Os02g08350.1	expressed protein	C4(Carbamidomethyl); S9(Phospho)	1393.58	0	1.37076e+07	1.55671e+07				1.9315e+07	2.18076e+07		1.47361e+07	1.4693e+07	1.72723e+07	1	S(9): 100.0	0	2.421e-11	303.87				High	14.77	2.55238	High	27.89	0.128337	High	32.06	0.0462991	High	56.97	0.000157814	High	26.12		High	27.37		High	30.75
ANLHITSDDDDKEVEDWLK	21	1	1	LOC_Os01g56100.1	BSD domain containing protein, expressed	S7(Phospho)	2323.02	0	1.29572e+08	0				1.3144e+08	1.20906e+08	1.36368e+08		1.24626e+08		0.987201	T(6): 1.3; S(7): 98.7	0	8.412e-06	361.725	High	31.46	0.117749	High	21.67	1.08889	High	20.25	1.54637	High	38.76	0.02156	High	37.86	0.0268765	High	39.74	0.017518	High	30.41		High	32.76		High
ANSGAVVTIQESLGSPDDITVEMK	20	1	1	LOC_Os10g41440.1	KH domain containing protein, putative, expressed	S15(Phospho)	2541.2	2.09034e+07	0	1.01121e+07	1.10503e+07	2.46963e+07	2.69636e+07				1.69654e+07		1.3371e+07	0.999997	S(3): 0.0; T(8): 0.0; S(12): 0.0; S(15): 100.0; T(20): 0.0	0	5.905e-10	442.457																			High	80.82	1.36114e-06	High	84.74	5.56317e-07	High
APASPEQPIIAPLLK	12	3	1	LOC_Os10g41030.3	agenet domain containing protein, putative, expressed	S4(Phospho)	1624.87	1.511e+08	0	1.19658e+08	1.45184e+08	1.42781e+08	1.65334e+08				1.25612e+08	1.10767e+08	1.22595e+08	1	S(4): 100.0	0	1.154e-07	617.004	High	75.6	1.69247e-06	High	67.83	1.01692e-05	High	59.94	6.29132e-05										High	62.18	3.06908e-05	High	64.88	1.63356e-05	High
APATSAAAAAAAAAAVPSFLTNPSR	3	1	1	LOC_Os07g36200.1	eukaryotic translation initiation factor-related, putative, expressed	S24(Phospho)	2335.16	3.24495e+07	0	0	3.35275e+07	3.0101e+07	3.372e+07							0.999996	T(4): 0.0; S(5): 0.0; S(18): 0.0; T(21): 0.0; S(24): 100.0	0	4.44e-08	441.258																			High	47.44	0.00263691	High	52.29	0.000974127	High
APDADGADKTDDEENPMMETVR	16	1	1	LOC_Os07g37750.1	ATMIN7, putative, expressed	T10(Phospho)	2486.97	7.89771e+07	0	0	8.14135e+07	6.41127e+07	9.1405e+07	4.97547e+07						1	T(10): 100.0; T(20): 0.0	0	1.314e-09	389.944	High	37.18	0.0213344	High	22.67	0.605645	High	25.24	0.341866	High	45.92	0.00258417	High	30.21		High	36.7	0.02247	High	54.52	0.000381085	High	43.82	0.00587575	High
APNPSLSPR	32	1	1	LOC_Os06g10710.1	expressed protein	S7(Phospho)	1018.47	2.70434e+08	7.23076e+08	4.29526e+08	418403759		3.92897e+08	6.57252e+08	7.60622e+08	7.51355e+08	3.61829e+08	4.34656e+08	4.92095e+08	1	S(5): 0.0; S(7): 100.0	0	0.003406	372.393	High	34.8	0.0258945	High	34.43	0.0291167	High	40.71	0.00664059	High	50.68	0.000699445	High	33.22	0.0372569	High	39.95	0.00825449	High	35.08	0.0255505	High	28.61		High
APPHHQQQGPGASPSPPPPPPR	26	1	1	LOC_Os03g13560.1	hydroxyproline-rich glycoprotein family protein, putative, expressed	S15(Phospho)	2314.09	3.22872e+07	0	0	4.03283e+07		5.65333e+07						8.40982e+07	1	S(13): 0.0; S(15): 100.0	0	2.319e-07	526.889	High	15.5	4.93217	High	24.38	0.637043	High	25.2	0.540269	High	28.76		High	28.31		High	22.76		High	36.35	0.0412496	High	32.19		High
APPPPALPSAPLFTTEKSPK	26	1	1	LOC_Os03g51250.1	adenylyl cyclase-associated protein, putative, expressed	S18(Phospho)	2126.1	4.88929e+08	0	0		6.94843e+08	7.71944e+08						5.2683e+07	0.999999	S(9): 0.0; T(14): 0.0; T(15): 0.0; S(18): 100.0	0	6.992e-09	538.849																			High	31.9		High	34.15	0.0396514	High
APPSIAR	2	1	1	LOC_Os03g22190.1	expressed protein	S4(Phospho)	791.392	3.39513e+07	0	0	93158163	8.69572e+06								1	S(4): 100.0	0.007	0.1098	140.884																			High	39.41	0.00894073	High	39.28	0.0092183
APPSPAVLPEAENPTIHR	52	1	1	LOC_Os03g64320.1	expressed protein	S4(Phospho)	1975.97	1.7156e+08	4.22307e+07	6.97399e+07	1.39859e+08	1.35891e+08	2.38929e+08	5.41687e+07	6.38809e+07	8.64252e+06	9.2418e+07	8.25254e+07	3.42764e+07	1	S(4): 100.0; T(15): 0.0	0	1.372e-09	509.914	High	67.83	2.26045e-05	High	56.39	0.000308832	High	75.38	3.9317e-06	High	61.02	0.000105714	High	54.88	0.000441469	High	47.43	0.00245685	High	58.66	0.000181413	High	60.87	0.000108324	High
APPSPSPSTSSR	47	1	1	LOC_Os02g01960.1	tetratricopeptide repeat domain containing protein, expressed	S4(Phospho); S8(Phospho)	1330.51	7.53187e+07	0	0		9.92474e+07	1.26709e+08							0.991508	S(4): 100.0; S(6): 0.0; S(8): 99.2; T(9): 0.8; S(10): 0.0; S(11): 0.0	0	0.002198	446.331				High	22.61	0.283185	High	15.42	1.42534				High	18.75		High	11.66		High	27.67		High	36.72	0.00974688	High
APSDAPPPPPPAPYAGGSPYHR	32	1	1	LOC_Os08g41470.2	proteophosphoglycan ppg4, putative, expressed	S18(Phospho)	2279.04	1.4052e+08	0	6.04646e+07	1.62931e+08	1.66592e+08	9.20353e+07	3.2888e+07			7.06245e+07	6.67027e+07	4.40667e+07	0.999903	S(3): 0.0; Y(14): 0.0; S(18): 100.0; Y(20): 0.0	0	2.4e-11	613.433	High	38.21	0.0268794	High	26.97	0.357217	High	30.21	0.169407	High	37.06	0.0348906	High	29.31		High	23.32		High	56.98	0.000359803	High	56.65	0.000386802	High
APSNFSSPR	73	1	1	LOC_Os02g15660.1	tetratricopeptide repeat, putative, expressed	S7(Phospho)	1042.44	5.26128e+08	7.99673e+08	3.21129e+08	532987242	4.99018e+08	5.46379e+08	8.1074e+08	7.5397e+08	8.34308e+08	3.60288e+08	3.79989e+08	2.23111e+08	0.5	S(3): 0.0; S(6): 50.0; S(7): 50.0	0	0.0008124	300.585	High	43.72	0.00280674	High	47.35	0.00122135	High	50.85	0.000543502	High	44.12	0.00255784	High	51.13	0.000509567	High	44.26	0.00249545	High	49.28	0.000780192	High	51.99	0.000416443	High
APSPSFR	29	1	1	LOC_Os07g48340.2	OsCML24 - Calmodulin-related calcium sensor protein, expressed	S5(Phospho)	841.364	4.12744e+08	0	3.86323e+08	5.02792e+08	3.23844e+08	4.11594e+08		2.70821e+08		2.82529e+08	4.76539e+08	3.99902e+08	1	S(3): 0.0; S(5): 100.0	0	0.01204	321.113	High	40.89	0.00362136	High	42.67	0.00234417	High	40.36	0.00399015	High	29.08		High	30.8	0.036057	High	26.6		High	39.16	0.00539351	High	38.48	0.00631481	High
APSPSPPPPPR	53	1	1	LOC_Os02g57500.1	expressed protein	S3(Phospho)	1179.56	1.12096e+08	0	1.35782e+08	158667327	7.10593e+07	1.06561e+08				1.25125e+08	2.26992e+08	5.52277e+07	0.999837	S(3): 100.0; S(5): 0.0	0	0.0004035	237.14	High	37.7	0.0129831	High	40.91	0.00588352	High	34.42	0.0265275	High	5.85		High	19.97		High	3.06		High	42.06	0.00460191	High	37.58	0.0132159	High
APTHSFK	17	1	1	LOC_Os10g42420.1	GTPase-activating protein, putative, expressed	S5(Phospho)	867.378	2.38465e+08	0	3.2633e+08	195181655	2.42176e+08	2.78037e+08			6.12446e+08	3.35365e+08	3.52111e+08	2.91513e+08	0.999999	T(3): 0.0; S(5): 100.0	0.001	0.02731	204.579	High	29.14	0.048211							High	21.19					High	35.42	0.0113539	High	29.56	0.0439883	High	30.04	0.0392865	High
APVIIYDASPK	19	2	1	LOC_Os02g33600.1	VQ domain containing protein, putative	S9(Phospho)	1253.62	5.5181e+07	3.01591e+07	7.86151e+07	8.7399e+07	7.81438e+07		5.10948e+07		3.93825e+07	9.47773e+07	7.00252e+07	7.10429e+07	1	Y(6): 0.0; S(9): 100.0	0	3.696e-07	388.406	High	48.27	0.00146702	High	40.62	0.00859593	High	46.92	0.00199069	High	36.72	0.0208026	High	29.02		High	33.77	0.0410314	High	43.82	0.00412464	High	65.36	2.86706e-05	High
APVSQSQPATPVASVAR	25	4	1	LOC_Os06g15360.4	RAD23 DNA repair protein, putative, expressed	T10(Phospho)	1745.86	2.24989e+08	0	1.19662e+08	2.20914e+08	2.26219e+08	2.27833e+08				1.16621e+08	1.18317e+08	1.24048e+08	1	S(4): 0.0; S(6): 0.0; T(10): 100.0; S(14): 0.0	0	6.64e-07	374.427	High	59.8	0.000134242	High	49.04	0.0016085	High	55.54	0.000361914				High	27.78		High	30.03		High	42.78	0.00664573	High	44.4	0.00463832	High
APVSQSQPATPVASVAR	30	4	1	LOC_Os06g15360.4	RAD23 DNA repair protein, putative, expressed	S6(Phospho); T10(Phospho)	1825.83	2.49281e+08	4.4457e+07	1.07053e+08	248738081	2.50438e+08	2.48668e+08	2.66619e+07	5.22852e+07	5.4424e+07	1.08999e+08	1.13287e+08	9.88738e+07	0.999998	S(4): 0.0; S(6): 100.0; T(10): 100.0; S(14): 0.0	0	9.749e-07	434.531	High	58.42	0.00021323	High	66	3.67489e-05	High	56.68	0.000315731	High	38.18	0.0222	High	47.47	0.00263756	High	36.53	0.0319934	High	61.62	0.000101852	High	69	1.85188e-05	High
AQDSSSIVSPIR	13	2	1	LOC_Os08g43060.3	expressed protein	S9(Phospho)	1339.63	1.65666e+08	0	1.30177e+08	169949940	1.68394e+08	1.58655e+08				1.42444e+08	1.03352e+08	1.44734e+08	1	S(4): 0.0; S(5): 0.0; S(6): 0.0; S(9): 100.0	0	0.0002777	332.151	High	36	0.0244783																High	59.13	0.000120958	High	60.07	9.74171e-05	High
AQIATVR	14	2	1	LOC_Os05g22614.3	PTAC16, putative, expressed	T5(Phospho)	838.421	4.16132e+09	1.93474e+09	0	4.0131e+09	3.96681e+09	4.50406e+09	2.05488e+09	1.79126e+09	1.95809e+09		2.39517e+09		1	T(5): 100.0	0.001	0.02956	163.468										High	36.78	0.0162563	High	35.87	0.0200457	High	35.44	0.022132	High	39.81	0.00809136	High	34.38	0.0282502	High
AQLLHDAGSLASVVSIGHGGAGR	5	1	1	LOC_Os10g39030.1	homeobox domain containing protein, expressed	S15(Phospho)	2253.12	1.70147e+07	0	0	2.53464e+07	2.56976e+07								1	S(9): 0.0; S(12): 0.0; S(15): 100.0	0	5.921e-12	422.674																			High	47.65	0.00288093	High	35.71	0.0446573	High
AQLPSPSPSPR	28	2	1	LOC_Os01g61860.2	TBC domain containing protein, expressed	S5(Phospho)	1216.57	1.84853e+08	0	0	2.94316e+08	2.60242e+08								1	S(5): 100.0; S(7): 0.0; S(9): 0.0	0	0.008177	336.565	High	24.5	0.397923	High	18.75	1.50221													High	36.53	0.0249233	High	34.99	0.0355625	High
AQPAVSPR	50	1	1	LOC_Os07g37750.1	ATMIN7, putative, expressed	S6(Phospho)	905.426	2.642e+09	0	0	3481646257	1.6759e+09	2.76845e+09		1.7862e+09		9.25574e+08			1	S(6): 100.0	0	0.02137	210.169	High	35.1	0.0268701	High	34.66	0.0297351	High	33.22	0.0414257	High	30.55		High	32.56	0.0482247	High	30.81		High	34.5	0.0307978	High	35.42	0.0251193	High
AQQHQPLSPAGDVK	34	1	1	LOC_Os06g22100.2	DNA binding protein, putative, expressed	S8(Phospho)	1555.73	0	0	1.37751e+08			3.01704e+08					2.00645e+08	2.12608e+08	1	S(8): 100.0	0	2.628e-06	487.544	High	22.17	0.735364	High	20.35	1.12369	High	25.57	0.338484	High	20.64		High	20.19		High	32.33		High	33.44		High	29.18		High
AQSGVMTAETGTYR	10	1	1	LOC_Os09g37230.1	protein kinase family protein, putative, expressed	T7(Phospho)	1551.65	0	1.11973e+08	2.18437e+08				1.05127e+08	1.15523e+08	1.1527e+08	2.5273e+08	2.05063e+08	1.97519e+08	1	S(3): 0.0; T(7): 100.0; T(10): 0.0; T(12): 0.0; Y(13): 0.0	0	3.816e-16	376.55	High	50.07	0.00113063	High	39.56	0.0128368	High	57.96	0.00017995	High	58.46	0.000163731	High	62.17	7.05634e-05	High	58.16	0.000177885
AQSGVMTAETGTYR	9	1	1	LOC_Os09g37230.1	protein kinase family protein, putative, expressed	M6(Oxidation); T7(Phospho)	1567.64	0	0	8.15993e+06								1.00695e+07	1.44103e+07	0.999998	S(3): 0.0; T(7): 100.0; T(10): 0.0; T(12): 0.0; Y(13): 0.0	0	5.748e-06	332.962				High	21.5	0.799979	High	18.16	1.68796
AQSMESLHSSVK	29	2	1	LOC_Os03g05200.2	DENN domain containing protein, expressed	S3(Phospho)	1383.6	1.52837e+08	0	1.85323e+08	1.54497e+08	1.50033e+08	1.5398e+08		1.75828e+08		2.12035e+08	1.64546e+08	1.79387e+08	1	S(3): 100.0; S(6): 0.0; S(9): 0.0; S(10): 0.0	0	1.965e-05	334.818	High	47.98	0.0012865	High	37.77	0.0134105	High	40.9	0.0065758	High	28.5		High	55.27	0.000243825	High	31.17		High	44.22	0.00316378	High	55.09	0.000258635	High
AQTNTTSGGSSSPGGGR	16	2	1	LOC_Os01g15460.3	zinc finger C-x8-C-x5-C-x3-H type family protein, expressed	S12(Phospho)	1601.66	2.48089e+07	0	2.04456e+07	2.31326e+07	2.48412e+07	2.64529e+07			1.51804e+07	1.72474e+07	2.13067e+07	2.27827e+07	0.983996	T(3): 0.0; T(5): 0.0; T(6): 0.0; S(7): 0.8; S(10): 0.8; S(11): 0.0; S(12): 98.4	0	5.544e-12	470.904				High	10.51	6.97578	High	70.6	6.79352e-06							High	93.2	3.73331e-08	High	88.95	9.85691e-08	High	94.54	2.75272e-08	High
ARDSPMTTFSVLEGAGR	27	1	1	LOC_Os01g64300.1	DUF584 domain containing protein, putative, expressed	S4(Phospho); S10(Phospho)	1954.82	0	0	3.91329e+07							5.61514e+07		6.12474e+07	0.333333	S(4): 100.0; T(7): 33.3; T(8): 33.3; S(10): 33.3	0	3.703e-06	363.888	High	32.93	0.0778767	High	44.3	0.00575322	High	33.84	0.0628658	High	23.97		High	32.89					High	31.05		High	34.28		High
ARLSPPSQTDLR	50	1	1	LOC_Os02g58440.1	zinc finger C-x8-C-x5-C-x3-H type family protein, expressed	S4(Phospho)	1420.7	0	0	4.14678e+08							4.61138e+08	4.78007e+08	3.04889e+08	1	S(4): 100.0; S(7): 0.0; T(9): 0.0	0	3.816e-16	301.798	High	42.98	0.0057097	High	37.78	0.0188316	High	31.1	0.0877547	High	28.2		High	23.61		High	34.57	0.0404828	High	29.72		High	31.8
ARPSTPPQTQADAK	50	1	1	LOC_Os09g23690.1	UBX domain containing protein, expressed	T5(Phospho)	1547.72	3.38649e+08	0	0	3.56653e+08	3.37888e+08	3.21406e+08				3.13156e+08			0.999915	S(4): 0.0; T(5): 100.0; T(9): 0.0	0	0.0003214	351.56	High	16.61	3.44653	High	51.87	0.00101778	High	62.73	8.21336e-05	High	24.86		High	33.6		High	28.8		High	45.25	0.00459749	High	45.17	0.00472097	High
ARSHTDETATPTK	25	1	1	LOC_Os08g43680.1	glutathione S-transferase, C-terminal domain containing protein, expressed	S3(Phospho)	1494.66	3.63065e+07	0	2.64182e+07	3.2847e+07	3.46568e+07	4.14156e+07			3.99068e+07	3.62669e+07	4.29878e+07		1	S(3): 100.0; T(5): 0.0; T(8): 0.0; T(10): 0.0; T(12): 0.0	0	0.0005007	412.663	High	21.48	0.851323	High	20.09	1.18714				High	17.96		High	32.57		High	46.56	0.00266837	High	39.43	0.0141619	High	45.17	0.00367491	High
ASAAAADAEDEDEAAAPATPSK	39	1	1	LOC_Os05g47470.2	VIP1 protein, putative, expressed	T19(Phospho)	2138.88	2.85082e+08	8.03661e+07	2.42483e+08	2.6866e+08	2.74179e+08	3.12406e+08	8.90841e+07	6.54438e+07	8.65704e+07	2.43014e+08	2.28799e+08	2.55635e+08	0.990717	S(2): 0.0; T(19): 99.1; S(21): 0.9	0	3.816e-16	673.579	High	55.44	0.000372201	High	62.3	7.88167e-05	High	62.8	6.73066e-05	High	49.2	0.00160082	High	55.54	0.000373223	High	62.22	7.69532e-05	High	81.31	9.81826e-07	High	72.48	7.56733e-06	High
ASAEVLGR	21	1	1	LOC_Os04g55620.1	receptor kinase, putative, expressed	S2(Phospho)	882.41	7.80367e+07	1.16312e+08	0	1.3159e+08		1.0252e+08	1.26739e+08	1.07352e+08	1.14844e+08			6.69573e+07	1	S(2): 100.0	0	0.01399	177.262	High	43.07	0.00393799	High	31.17	0.0610687	High	27.84	0.133359	High	45.78	0.00214299	High	41.8	0.00535822	High	46.12	0.00195352	High	40.45	0.00721257	High	25.81		High
ASAPIDGDQGTSQKPTVSDGERPA	30	1	1	LOC_Os02g45110.1	MT-A70 domain containing protein, expressed	S18(Phospho)	2464.11	4.58378e+08	0	3.39983e+08	4.48424e+08	4.64545e+08	4.62165e+08					5.08663e+08	5.11287e+08	0.999999	S(2): 0.0; T(11): 0.0; S(12): 0.0; T(16): 0.0; S(18): 100.0	0	1.418e-05	538.702	High	26.59	0.445578	High	26.62	0.44262	High	32.22	0.121938	High	23.37		High	33.27		High	32.15		High	41.1	0.0158354	High	46.5	0.00456811	High
ASASPPPASASTGGDR	76	2	1	LOC_Os08g40560.2	ZOS8-11 - C2H2 zinc finger protein, expressed	S2(Phospho); S4(Phospho)	1588.61	4.9846e+08	2.46849e+08	3.65419e+08	481919684	5.63847e+08	4.49612e+08	2.32746e+08	2.60807e+08	2.46994e+08	5.19116e+08	5.23056e+08	5.40836e+07	1	S(2): 100.0; S(4): 100.0; S(9): 0.0; S(11): 0.0; T(12): 0.0	0	2.568e-12	397.169	High	51.76	0.000385414	High	51.83	0.000379908	High	56.7	0.000123681	High	52.68	0.000312377	High	49.87	0.000602776	High	47.96	0.000926144	High	49.98	0.000581673	High	47.61	0.00102121	High
ASASPPPASASTGGDR	54	2	1	LOC_Os08g40560.2	ZOS8-11 - C2H2 zinc finger protein, expressed	S4(Phospho)	1508.64	1.61583e+08	0	0	1.48704e+08	1.72597e+08	1.6345e+08	4.05691e+07			8.34403e+07			1	S(2): 0.0; S(4): 100.0; S(9): 0.0; S(11): 0.0; T(12): 0.0	0	1.976e-05	302.001	High	44.02	0.00474939	High	36.89	0.0242094	High	33.37	0.0548626	High	33.86	0.0494202	High	30.44		High	27.57		High	41.93	0.00764322	High	41.78	0.00792509	High
ASDAKPDSPPAGVDPPPPK	114	1	1	LOC_Os01g70020.1	DEK C terminal domain containing protein, expressed	N-Term(Acetyl); S8(Phospho)	1964.91	1.20495e+08	2.54336e+08	0	174150520	1.02395e+08	8.49404e+07	1.14181e+08	3.33532e+08	3.15295e+08		7.93942e+07		1	S(2): 0.0; S(8): 100.0	0	5.248e-06	414.935	High	41.1	0.0159907	High	31.62	0.143171	High	37.98	0.0330702	High	46.86	0.00425829	High	44.55	0.0072325	High	46.87	0.00427522	High	38.73	0.0276107	High	40.77	0.017228	High
ASDAKPDSPPAGVDPPPPK	40	1	1	LOC_Os01g70020.1	DEK C terminal domain containing protein, expressed	S8(Phospho)	1922.89	0	8.93011e+07	0		5.89221e+07		9.81195e+07	1.20294e+08	4.94901e+07		5.26168e+07		1	S(2): 0.0; S(8): 100.0	0	1.015e-05	376.102	High	36.08	0.0415651	High	35.47	0.0469817	High	37.38	0.0309497	High	49.05	0.00210696	High	46.18	0.00407756	High	45.55	0.0047169	High	34.42		High	35.79	0.0443035	High
ASDFDSLGSDGGPGPVR	18	2	1	LOC_Os05g04850.2	RNA recognition motif containing protein, putative, expressed	S9(Phospho)	1713.72	0	0	1.72586e+07					2.41886e+07		2.63775e+07	9.33168e+06	1.60667e+07	0.999999	S(2): 0.0; S(6): 0.0; S(9): 100.0	0	1.171e-06	309.192	High	79.12	1.44443e-06	High	57.34	0.000213745	High	54.88	0.000385066	High	23.57		High	39.8	0.0126388	High	33.26					High	28.28
ASEAEAEVAAGPEVVLPIGAQK	8	1	1	LOC_Os03g60800.1	transposon protein, putative, unclassified, expressed	N-Term(Acetyl); S2(Phospho)	2258.11	0	1.47419e+07	2.54384e+07				1.96862e+07	1.44287e+07	1.01107e+07	2.58815e+07	2.30839e+07	2.73499e+07	1	S(2): 100.0	0	2.545e-07	395.7							High	49.4	0.00184279	High	67.36	2.93938e-05	High	46.32	0.00371487	High	61.82	0.000105686
ASEEDEGSVKPSEGNDALEK	24	1	1	LOC_Os06g13030.1	OsLIM - LIM domain protein, putative actin-binding protein and transcription factor, expressed	S8(Phospho)	2170.91	2.89769e+07	0	0	6.79789e+07		1.89517e+07							1	S(2): 0.0; S(8): 100.0; S(12): 0.0	0	3.147e-05	352.572	High	14.78	4.52583	High	33.77	0.0559958	High	17.14	2.53764	High	26.76		High	24.7		High	9.88		High	37.83	0.0225633	High	12.22		High
ASGPATPPDISDK	27	1	1	LOC_Os01g19740.1	calvin cycle protein CP12, putative, expressed	S2(Phospho)	1335.59	0	0	1.44366e+08							2.19655e+08		2.13444e+08	1	S(2): 100.0; T(6): 0.0; S(11): 0.0	0	0.0004556	230.317	High	26.39	0.250395	High	32.86	0.0571956	High	30.7	0.0946465	High	31.24		High	31.36		High	33.15		High	25.09		High	26.72		High
ASGSSSSSEEGEDDVAAQR	10	1	1	LOC_Os10g36180.1	expressed protein	S8(Phospho)	1948.74	0	1.6127e+08	1.63519e+07				1.47083e+08	1.65598e+08	1.71129e+08	9.97272e+06		3.9083e+07	0.999843	S(2): 0.0; S(4): 0.0; S(5): 0.0; S(6): 0.0; S(7): 0.0; S(8): 100.0	0	1.819e-08	340.82										High	92.44	3.87712e-08	High	68.09	1.07037e-05	High	39.62	0.00785837
ASLDADEFIALMHGSDPVR	23	1	1	LOC_Os06g14080.1	ATMAP70 protein, putative, expressed	S2(Phospho)	2123.98	3.80375e+07	0	2.61978e+07	3.79657e+07	4.16784e+07	3.44683e+07				2.54215e+07	2.64791e+07	2.66928e+07	1	S(2): 100.0; S(15): 0.0	0	3.944e-07	527.826	High	60.52	0.000170689	High	68.71	2.54771e-05	High	36.65	0.0411241										High	67.18	3.68207e-05	High	71.77	1.15292e-05	High
ASLEEEDDILSDEDDFYDR	6	1	1	LOC_Os06g16430.1	FHA domain containing protein, putative, expressed	S11(Phospho)	2355.89	0	1.04946e+07	0	9014669				1.48154e+07	1.66684e+07			1.14738e+07	1	S(2): 0.0; S(11): 100.0; Y(17): 0.0	0	4.592e-09	380.291	High	81.7	4.96583e-07										High	66.69	1.7636e-05	High	66.27	1.90963e-05	High	81.09	6.4188e-07
ASLEGSAPVPIHK	3	3	1	LOC_Os12g06810.2	WD domain, G-beta repeat domain containing protein, expressed	S2(Phospho)	1385.69	3.02207e+07	0	0	4.90026e+07		4.16594e+07							1	S(2): 100.0; S(6): 0.0	0	0.003864	222.896																			High	35.17	0.0290557	High	28.75		High
ASLKSPVAAEEQAATAAAAAAK	36	1	1	LOC_Os03g54000.1	oligopeptide transporter, putative, expressed	N-Term(Acetyl); S5(Phospho)	2149.06	4.7099e+08	2.16046e+08	3.42639e+08	5.03834e+08	4.48756e+08	4.60381e+08	1.9585e+08	2.50003e+08	2.02285e+08	3.70604e+08	3.38671e+08	3.18641e+08	1	S(2): 0.0; S(5): 100.0; T(15): 0.0	0	1.885e-14	627.33	High	78.82	1.99126e-06	High	85.55	4.18893e-07	High	82.47	8.53039e-07	High	74.09	5.93492e-06	High	92.36	8.72889e-08	High	80.16	1.46647e-06	High	94.3	5.32782e-08	High	88.98	1.82375e-07	High
ASLSDPNSPPPHVVEDCR	209	1	1	LOC_Os07g06840.1	gibberellin receptor GID1L2, putative, expressed	N-Term(Acetyl); S8(Phospho); C17(Carbamidomethyl)	2098.9	1.13711e+08	3.47936e+07	1.67233e+08	8.98181e+07	1.37634e+08	1.13681e+08	4.07411e+07	4.19231e+07	2.17167e+07	3.19409e+08	8.59263e+07	9.63631e+07	1	S(2): 0.0; S(4): 0.0; S(8): 100.0	0	3.157e-08	564.84	High	38.8	0.020545	High	42.2	0.0092041	High	53.65	0.000654183	High	38.69	0.0203893	High	46.77	0.00326506	High	46.61	0.00330902	High	51.52	0.00110566	High	51.99	0.000995732	High
ASPGPATAGELLR	9	1	1	LOC_Os08g06020.1	MSP domain containing protein, expressed	N-Term(Acetyl); S2(Phospho)	1361.65	1.51801e+08	0	1.17767e+08	157412005	1.34173e+08	1.63819e+08					1.97622e+08	1.55678e+08	1	S(2): 100.0; T(7): 0.0	0	0.0002202	301.686	High	42.81	0.00620728	High	46.04	0.0029157	High	42.18	0.00708551										High	46.51	0.00261998	High	44.85	0.0037726	High
ASPLHAGSDPAMR	23	1	1	LOC_Os03g63140.2	nitrate-induced NOI protein, expressed	S2(Phospho)	1389.6	3.77082e+08	0	3.99339e+08	377111472	3.7435e+08	3.79783e+08		5.96696e+08		4.11504e+08	3.91557e+08	3.94955e+08	1	S(2): 100.0; S(8): 0.0	0	4.272e-06	295.629	High	37.41	0.0202067	High	34.02	0.0442444	High	27.03	0.220544	High	31.11		High	37.15	0.0216076	High	33.15		High	48.07	0.00172487	High	39.47	0.0126707	High
ASPPHSVVHQNSHAHVNR	88	1	1	LOC_Os08g01900.1	armadillo/beta-catenin repeat family protein, putative, expressed	S12(Phospho)	2053.95	2.83933e+08	0	0		3.71928e+08	4.7987e+08							1	S(2): 0.0; S(6): 0.0; S(12): 100.0	0	0.003119	278.864	High	42.93	0.00798631	High	37.96	0.025169	High	37.89	0.0254886	High	9.38		High	24.11		High	23.35		High	30.82		High	45.4	0.00449909	High
ASPPHSVVHQNSHAHVNR	44	1	1	LOC_Os08g01900.1	armadillo/beta-catenin repeat family protein, putative, expressed	S2(Phospho); S12(Phospho)	2133.92	3.14737e+08	0	0	523632984	4.20579e+08								1	S(2): 100.0; S(6): 0.0; S(12): 100.0	0	3.705e-05	278.372	High	36.48	0.0294851	High	40.52	0.0118302	High	33.22	0.0642705	High	25.41		High	15.92		High	27.19		High	37.94	0.0211554	High	40.78	0.0112263	High
ASPPISPAEALDR	45	1	1	LOC_Os07g42220.1	expressed protein	S2(Phospho)	1403.66	8.20938e+07	0	1.42753e+08	1.35902e+08	1.10379e+08				6.1695e+07	2.30956e+08	1.97302e+08		1	S(2): 100.0; S(6): 0.0	0	0.0001244	264.587	High	36.91	0.0221936	High	28.73	0.14435	High	27.42	0.197255	High	28.15		High	33.37		High	36.1	0.0269036	High	35.11	0.0327126	High	35.51	0.0306357	High
ASPQCCANPPTLNPAGGEGK	26	1	1	LOC_Os05g33100.1	endo-1,3;1,4-beta-D-glucanase precursor, putative, expressed	N-Term(Acetyl); S2(Phospho); C5(Carbamidomethyl); C6(Carbamidomethyl)	2147.89	1.88768e+08	0	9.38003e+07	2.23631e+08	2.40015e+08	1.02658e+08				9.01948e+07	1.71536e+08	1.967e+07	1	S(2): 100.0; T(11): 0.0	0	2.048e-07	340.828	High	26.37	0.331018	High	42.29	0.00856087	High	24.58	0.542884										High	78.32	2.1297e-06	High	75.58	3.90692e-06	High
ASPSAPGPK	35	1	1	LOC_Os01g32780.1	universal stress protein domain containing protein, putative, expressed	N-Term(Acetyl); S2(Phospho)	933.411	4.08436e+08	0	5.74566e+08	394571024	4.14369e+08	4.16367e+08				6.16968e+08	5.32708e+08	5.74023e+08	1	S(2): 100.0; S(4): 0.0	0	0.0007118	252.545	High	33.1	0.0217217	High	31.15	0.0340325	High	46.28	0.00103151	High	12.4		High	7.62		High	26.75		High	37.68	0.00756648	High	38.99	0.00578548	High
ASPTPSSEQQIAAYLSR	10	1	1	LOC_Os03g19590.1	phytochrome B, putative, expressed	S2(Phospho)	1885.87	3.52572e+07	0	2.78753e+07	3.86734e+07	3.31822e+07	3.39159e+07				3.26762e+07	2.57896e+07	2.51601e+07	0.999998	S(2): 100.0; T(4): 0.0; S(6): 0.0; S(7): 0.0; Y(14): 0.0; S(16): 0.0	0	6.485e-09	400.942							High	73.8	6.62405e-06										High	74.04	5.44351e-06	High	78.72	1.8698e-06	High
ASPVSVPLAAVPK	25	2	1	LOC_Os01g15020.1	lissencephaly type-1-like homology motif, putative, expressed	S2(Phospho)	1315.71	5.73342e+08	2.43002e+08	2.49469e+08	6.04282e+08	5.65021e+08	5.50723e+08	2.74486e+08	2.28788e+08	2.25731e+08		3.59046e+08	3.8936e+08	1	S(2): 100.0; S(5): 0.0	0	0.002724	333.399	High	39.04	0.0104967	High	42.01	0.00530044	High	37.67	0.0138255	High	39.66	0.00945173	High	36.9	0.0178346	High	36.55	0.0193314	High	43.88	0.00358103	High	44.04	0.00344361	High
ASQLEVVPAAGPSPAPPVEAR	12	1	1	LOC_Os03g59360.1	remorin, putative, expressed	S13(Phospho)	2123.06	0	0	2.81087e+07							4.48285e+07		3.94974e+07	1	S(2): 0.0; S(13): 100.0	0	5.627e-06	363.635							High	29.87	0.140287				High	20.9		High	18.94		High	23.62		High	17.72		High
ASSDDTSSSAATGDELIEDLK	17	2	1	LOC_Os02g49870.2	expressed protein	T6(Phospho)	2191.91	0	4.0252e+07	1.67567e+07		1.19357e+07		2.74316e+07	5.17137e+07	4.16109e+07		1.60942e+07	3.41757e+07	0.999812	S(2): 0.0; S(3): 0.0; T(6): 100.0; S(7): 0.0; S(8): 0.0; S(9): 0.0; T(12): 0.0	0	8.04e-08	374.173	High	68.62	2.00748e-05	High	77.01	2.75211e-06	High	76.28	3.23584e-06	High	97.18	2.57372e-08	High	87.19	2.77215e-07	High	98.09	2.19896e-08				High	62.76	7.24844e-05
ASSEAWSAGER	17	1	1	LOC_Os03g12450.1	nucleoporin, putative, expressed	S3(Phospho)	1230.48	8.29584e+07	1.12418e+08	0	1.27548e+08	1.21327e+08		1.00324e+08	1.13681e+08	1.23248e+08	1.14866e+08			0.999997	S(2): 0.0; S(3): 100.0; S(7): 0.0	0	0.001221	181.864	High	45.2	0.00139522	High	34.76	0.0152393	High	42.64	0.00254827	High	31.4	0.0341934	High	34.89	0.0153575	High	30.81	0.0395839	High	40.98	0.00373861	High	36.41	0.011428	High
ASSFSLAEAK	12	1	1	LOC_Os04g55040.1	vacuolar ATP synthase subunit D 1, putative, expressed	S3(Phospho)	1090.48	3.13902e+07	0	1.87427e+07	3.14747e+07	3.09793e+07	3.17166e+07				2.98329e+07	2.63952e+07		0.99991	S(2): 0.0; S(3): 100.0; S(5): 0.0	0	0.002506	212.333	High	53	0.000508705	High	33.39	0.0465014	High	47.9	0.00164857							High	21.53		High	39.83	0.010888	High	36.47	0.0236695	High
ASSGDDDDHPHPR	18	1	1	LOC_Os07g43990.1	expressed protein	S3(Phospho)	1485.54	2.23595e+07	4.17715e+07	1.03161e+07	1.46097e+07	2.64435e+07	2.60253e+07	4.54154e+07	3.49027e+07	4.49964e+07		1.54314e+07	1.5517e+07	1	S(2): 0.0; S(3): 100.0	0	3.629e-05	409.41				High	49.26	0.000535375				High	54.26	0.00016855	High	54.94	0.000144763	High	60.78	3.82706e-05	High	58.26	6.81461e-05	High	70.54	3.9562e-06	High
ASSGPITR	12	1	1	LOC_Os01g62670.1	avr9/Cf-9 rapidly elicited protein, putative, expressed	S3(Phospho)	868.393	0	5.19301e+07	2.07664e+07				5.2303e+07	4.98185e+07	5.36687e+07	3.14607e+07		3.08384e+07	1	S(2): 0.0; S(3): 100.0; T(7): 0.0	0	0.009384	226.375	High	34.7	0.0242104	High	30.69	0.0616365	High	31.65	0.04825	High	39.78	0.00760042	High	45.99	0.00181902	High	35.27	0.0214703
ASSHASMAAAAADPDDFDLTR	52	1	1	LOC_Os04g35280.1	neutral/alkaline invertase, putative, expressed	S3(Phospho)	2199.91	7.44135e+07	0	7.31469e+07	8.05583e+07	7.79867e+07	6.46954e+07	3.75281e+07			8.27245e+07	6.65852e+07	7.01312e+07	0.989787	S(2): 1.0; S(3): 99.0; S(6): 0.0; T(20): 0.0	0	7.695e-11	544.242	High	46.41	0.0031827	High	47.1	0.00270346	High	57.47	0.000245671	High	35.23	0.042978							High	61.23	0.000103963	High	75.34	4.23125e-06	High
ASSLSELGFDADGPSFFR	34	1	1	LOC_Os06g01590.1	lactate/malate dehydrogenase, putative, expressed	S3(Phospho)	1982.86	7.60177e+07	1.58922e+07	7.52994e+07	2.16737e+07	1.00759e+08	1.0562e+08		2.0222e+07	2.74547e+07	9.27167e+07	6.508e+07	6.81016e+07	0.988806	S(2): 1.1; S(3): 98.9; S(5): 0.0; S(15): 0.0	0	2.801e-07	333.179	High	52.78	0.000746557	High	69.64	1.43028e-05	High	49.74	0.0015023				High	51.1	0.00102154	High	79.9	1.45308e-06	High	68.88	1.86299e-05	High	54.89	0.000426831	High
ASSLSELGFDAEGASSGFFRPVADGGSTPTSHR	15	1	1	LOC_Os02g01510.1	lactate/malate dehydrogenase, putative, expressed	S3(Phospho)	3377.53	3.54901e+07	0	1.43894e+08		4.70502e+07	5.94202e+07				1.706e+08	1.18282e+08	1.42799e+08	0.5	S(2): 50.0; S(3): 50.0; S(5): 0.0; S(15): 0.0; S(16): 0.0; S(27): 0.0; T(28): 0.0; T(30): 0.0; S(31): 0.0	0	1.46e-09	330.261	High	7.49	36.7348				High	25.48	0.588363													High	45.93	0.00525984	High
ASSPASAASEEEAVK	47	3	1	LOC_Os07g39780.3	SUMO-activating enzyme subunit 2, putative, expressed	N-Term(Acetyl); S3(Phospho)	1555.65	4.92172e+08	7.99199e+07	4.02007e+08	561762642	3.629e+08	5.51854e+08	9.65586e+07		1.43201e+08	5.30593e+08	4.5082e+08	2.24608e+08	0.987227	S(2): 1.3; S(3): 98.7; S(6): 0.0; S(9): 0.0	0	4.178e-07	304.411	High	59.83	9.72845e-05	High	48.46	0.00126523	High	56.66	0.000189558	High	39.5	0.00985693	High	48.41	0.00130439	High	45	0.00281917	High	62.81	4.83283e-05	High	58.04	0.000142982	High
ASSPHQVVAPQPQSQAQAGGGGGGGGGTAEQFWSLLDK	12	3	1	LOC_Os09g40000.5	AGAP005770-PA, putative, expressed	N-Term(Acetyl); S3(Phospho)	3784.75	4.53416e+07	0	0	3.36727e+07	4.42851e+07	5.80669e+07							0.999619	S(2): 0.0; S(3): 100.0; S(14): 0.0; T(28): 0.0; S(34): 0.0	0	1.258e-12	523.3																			High	90.81	2.09413e-07	High	76.4	5.27587e-06	High
ASSPVADKHEQSDR	29	1	1	LOC_Os02g50840.1	BAH domain containing protein, putative, expressed	S3(Phospho)	1606.69	1.15307e+08	2.65357e+08	1.76425e+08	1.13272e+08	1.09807e+08	1.22843e+08	1.2256e+08	3.52745e+08	3.20765e+08	1.62508e+08	1.97075e+08	1.6969e+08	0.990507	S(2): 0.9; S(3): 99.1; S(12): 0.0	0	2.935e-05	358.987				High	41.74	0.0063974	High	36.59	0.0209413	High	45.79	0.00254933	High	49.72	0.00103353	High	56.55	0.000211351	High	46.45	0.00219784	High	47.83	0.00159707	High
ASSQVSGENHTALAALK	12	1	1	LOC_Os02g10970.1	peptidyl-prolyl cis-trans isomerase, putative, expressed	S3(Phospho); S6(Phospho)	1843.8	2.07583e+07	0	4.64231e+07	18948073	2.16958e+07	2.16311e+07				4.46106e+07	4.3524e+07	5.11348e+07	0.999736	S(2): 0.0; S(3): 100.0; S(6): 100.0; T(11): 0.0	0	7.205e-05	305.097																High	27.33		High	50.68	0.00116888	High	51.21	0.00102324	High
ASSSENVEAPR	59	1	1	LOC_Os07g03070.1	tetratricopeptide repeat containing protein, putative, expressed	N-Term(Acetyl); S3(Phospho)	1268.52	1.39436e+08	0	1.02986e+08	191272507	1.3268e+08	9.43545e+07	1.10909e+08			1.48074e+08		1.60884e+08	0.499965	S(2): 0.0; S(3): 50.0; S(4): 50.0	0	0.0003918	242.641	High	56.76	0.000148869	High	57.12	0.000137027	High	40.14	0.00683604	High	43.92	0.00313661	High	27.22		High	29.71		High	39.84	0.00788522	High	32.99	0.0389064	High
ASSSGDSTPKPIR	29	1	1	LOC_Os04g53660.1	transposon protein, putative, unclassified, expressed	S3(Phospho)	1382.63	0	0	9.71926e+07	59226318			3.57534e+07			9.51349e+07	9.50246e+07	1.01418e+08	0.999836	S(2): 0.0; S(3): 100.0; S(4): 0.0; S(7): 0.0; T(8): 0.0	0	0.001475	239.262	High	21.92	1.10928	High	17.38	3.1553				High	41.84	0.0113219	High	12.68		High	12.06		High	40.63	0.014951	High	23.83		High
ASSSSSSSFPAFASK	9	1	1	LOC_Os01g74020.1	MYB family transcription factor, putative, expressed	S3(Phospho)	1527.64	0	0	5.81605e+07							6.09301e+07	5.34512e+07	6.01002e+07	0.988023	S(2): 0.0; S(3): 98.8; S(4): 1.2; S(5): 0.0; S(6): 0.0; S(7): 0.0; S(8): 0.0; S(14): 0.0	0	6.303e-06	241.94	High	58.53	0.000121764	High	41.19	0.0069836	High	30.8	0.0758984
ASSWTFDEK	17	1	1	LOC_Os01g12660.1	AAA-type ATPase family protein, putative, expressed	S3(Phospho)	1150.45	0	0	3.22112e+07						3.34695e+07	5.24632e+07	4.41705e+07		0.999946	S(2): 0.0; S(3): 100.0; T(5): 0.0	0	0.00273	225.767	High	34.17	0.0177822	High	21.85	0.296195	High	19.9	0.464063	High	18.06		High	18.92		High	31.24	0.0349129	High	20.49		High	9.06		High
ASTAGGSGGFSGGGGSNMLR	6	2	1	LOC_Os11g01300.1	protein transport protein Sec61 subunit beta, putative, expressed	S16(Phospho)	1807.74	0	4.78036e+07	0				4.17829e+07	4.81763e+07	5.34515e+07				0.999773	S(2): 0.0; T(3): 0.0; S(7): 0.0; S(11): 0.0; S(16): 100.0	0	0.0002586	349.233										High	60.14	0.000100701	High	68.76	1.37835e-05	High	60.54	9.36065e-05
ASTEEGEAEVSKPGSR	15	1	1	LOC_Os02g47880.1	tetratricopeptide repeat domain containing protein, expressed	S15(Phospho)	1713.74	4.02406e+07	0	3.12067e+07	40847997	4.12851e+07	3.85887e+07	2.63967e+07			5.10859e+07		4.25341e+07	1	S(2): 0.0; T(3): 0.0; S(11): 0.0; S(15): 100.0	0	2.569e-06	405.873	High	42.07	0.00745353	High	25.74	0.32469	High	27.89	0.19661	High	38.09	0.0190633				High	30.76		High	64.07	4.74595e-05	High	48.97	0.00157189	High
ASVASYTNDSSGAESSPR	40	1	1	LOC_Os02g50550.1	dynamin, putative, expressed	S16(Phospho)	1865.76	2.79614e+08	3.90942e+07	1.2753e+08	2.90999e+08	2.62094e+08	2.8575e+08	3.9784e+07	3.85564e+07	3.89421e+07	1.35437e+08	1.20319e+08	1.26833e+08	0.999925	S(2): 0.0; S(5): 0.0; Y(6): 0.0; T(7): 0.0; S(10): 0.0; S(11): 0.0; S(15): 0.0; S(16): 100.0	0	2.991e-07	496.317	High	69.73	9.94442e-06	High	54.79	0.000317125	High	71.7	6.34166e-06	High	46.76	0.00200847	High	70.51	8.72306e-06	High	52.32	0.000573829	High	69.88	1.00283e-05	High	76.53	2.1655e-06	High
ASVIAPTILETGKSFTAK	30	1	1	LOC_Os03g52780.1	expressed protein	S14(Phospho)	1914.01	1.11744e+08	5.46947e+07	9.22907e+07	119836435	1.12933e+08	1.02463e+08	5.70522e+07	5.15941e+07	5.54378e+07	9.60605e+07	9.61191e+07	8.46925e+07	0.990627	S(2): 0.0; T(7): 0.0; T(11): 0.0; S(14): 99.1; T(16): 0.9	0	1.437e-05	466.97	High	51.49	0.000939126	High	55.18	0.000400929	High	50.01	0.00133442	High	48.96	0.0016816	High	57.61	0.000227822	High	44.24	0.00497437	High	47.18	0.00252777	High	60.19	0.000121755	High
ATAFDSPTASPAASPFDDDSFLR	36	2	1	LOC_Os06g51510.1	expressed protein	N-Term(Acetyl); T2(Phospho)	2508.05	3.56712e+08	1.25434e+08	3.13198e+08	1.61828e+08	2.15576e+08	6.92733e+08	9.89056e+07	1.40204e+08	1.37192e+08	2.94093e+08	3.36525e+08	3.08975e+08	0.999846	T(2): 100.0; S(6): 0.0; T(8): 0.0; S(10): 0.0; S(14): 0.0; S(20): 0.0	0	1.238e-08	468.289	High	87.82	2.57789e-07	High	74.3	5.87583e-06	High	79.39	1.79582e-06	High	84.93	5.01652e-07	High	88.46	2.23963e-07	High	68.18	2.37357e-05	High	103.11	7.84287e-09	High	98.59	2.20886e-08	High
ATAVSPPESPTGVGAR	4	1	1	LOC_Os01g56030.1	EF hand family protein, putative, expressed	S5(Phospho); S9(Phospho)	1656.7	1.59032e+07	0	0		2.14666e+07	2.62431e+07							0.985861	T(2): 0.0; S(5): 100.0; S(9): 98.6; T(11): 1.4	0	0.0004226	339.34																			High	31.02		High	34.94	0.0364553	High
ATGAFILTASHNPGGPTEDFGIK	170	2	1	LOC_Os03g50480.2	phosphoglucomutase, putative, expressed	S10(Phospho)	2381.12	3.5139e+09	1.03722e+09	4.05242e+09	3.49542e+09	3.44467e+09	3.60161e+09	9.12766e+08	1.17429e+09	1.02462e+09	4.56251e+09	3.87629e+09	3.71847e+09	0.999999	T(2): 0.0; T(8): 0.0; S(10): 100.0; T(17): 0.0	0	1.884e-12	524.645	High	92.64	1.05634e-07	High	83.86	7.90024e-07	High	83.06	9.44381e-07	High	72.16	1.16458e-05	High	82.62	1.05219e-06	High	74.53	6.82895e-06	High	69.8	2.02724e-05	High	83.01	9.65567e-07	High
ATGAPAGVASPGASPSNLIVMK	6	3	1	LOC_Os07g38360.2	expressed protein	S10(Phospho)	2076.03	2.52492e+07	0	0	2.42613e+07	2.7057e+07	2.44291e+07							1	T(2): 0.0; S(10): 100.0; S(14): 0.0; S(16): 0.0	0	7.485e-10	474																			High	58.56	0.000202983	High	70.95	1.17074e-05	High
ATHPASPVAGGEK	26	1	1	LOC_Os05g42230.1	universal stress protein domain containing protein, putative, expressed	N-Term(Acetyl); S6(Phospho)	1343.6	1.16396e+09	0	6.81644e+08	1157628211	1.10086e+09	1.2334e+09				7.0064e+08	6.40115e+08	7.04176e+08	1	T(2): 0.0; S(6): 100.0	0	4.931e-05	353.431	High	45.02	0.00317136	High	41.22	0.0077699	High	50.84	0.000849686	High	22.58		High	20.87					High	42.63	0.0056868	High	40.97	0.00825429	High
ATIMSPTASAMSPTAAPWVK	19	1	1	LOC_Os03g08270.2	ataxin-2 C-terminal region family protein, expressed	S5(Phospho); S12(Phospho)	2177.96	6.84791e+07	2.99782e+07	3.46664e+07	65352423	6.71118e+07	7.29732e+07		3.61543e+07	5.37802e+07	5.35684e+07		5.04309e+07	0.999996	T(2): 0.0; S(5): 100.0; T(7): 0.0; S(9): 0.0; S(12): 100.0; T(14): 0.0	0	2.207e-06	500.68							High	34.61	0.0496423				High	65.37	4.7626e-05	High	52.99	0.000929585	High	66.14	4.48255e-05	High	78.55	2.57909e-06	High
ATQTVEDSSRPGPR	385	2	1	LOC_Os04g16848.1	photosystem II reaction center protein H, putative	T2(Phospho)	1580.71	3.82046e+10	8.08143e+10	3.446e+10	2.63576e+10	4.58136e+10	4.24427e+10	7.80537e+10	7.77918e+10	8.65974e+10	2.11064e+10	4.22622e+10	4.00113e+10	0.999903	T(2): 100.0; T(4): 0.0; S(8): 0.0; S(9): 0.0	0	0.009436	301.809	High	46.43	0.00230126	High	43.31	0.00475293	High	42.75	0.00548404	High	43.04	0.0051149	High	41.62	0.00706557	High	45.02	0.00320598	High	44.2	0.00394066	High	48.17	0.00158044	High
ATSLSSSTVPSMSR	8	1	1	LOC_Os05g40220.2	transposon protein, putative, unclassified, expressed	S3(Phospho)	1490.66	6.2139e+07	0	3.63174e+07	9.60124e+07	9.04046e+07					6.14725e+07	4.74799e+07		0.999998	T(2): 0.0; S(3): 100.0; S(5): 0.0; S(6): 0.0; S(7): 0.0; T(8): 0.0; S(11): 0.0; S(13): 0.0	0	1.366e-09	240.327							High	27.3	0.176898										High	54.47	0.000354415	High	42.54	0.00556071
ATSSNNLNSAATTR	5	2	1	LOC_Os01g04880.1	retrotransposon protein, putative, unclassified, expressed	T2(Phospho)	1487.65	2.48302e+07	0	0	2.74222e+07	2.29014e+07	2.4167e+07							0.0115638	T(2): 1.2; S(3): 97.7; S(4): 1.2; S(9): 0.0; T(12): 0.0; T(13): 0.0	0	4.242e-06	222.799																			High	57.88	0.000258569	High	57.41	0.000289756	High
ATTAAASSPSQDHHDADK	8	1	1	LOC_Os11g42660.1	Leucine Rich Repeat family protein	S8(Phospho)	1889.77	0	0	1.56749e+07							2.31686e+07	2.38559e+07		0.986625	T(2): 0.0; T(3): 0.0; S(7): 1.3; S(8): 98.7; S(10): 0.0	0	5.304e-09	302.804													High	26.9											High
AVDAGMMEYDSDDNPIVVDK	12	1	1	LOC_Os03g19530.1	DEAD-box ATP-dependent RNA helicase, putative, expressed	S11(Phospho)	2263.92	2.38694e+07	5.84009e+07	5.59979e+07	39767968	3.18404e+07		5.22845e+07	6.70545e+07	5.58638e+07	5.51113e+07	5.45796e+07	5.83029e+07	1	Y(9): 0.0; S(11): 100.0	0	1.402e-10	451.008	High	60.69	0.000115296	High	70.03	1.19124e-05	High	53.41	0.000622262	High	60.01	0.000130998	High	77.08	2.64444e-06	High	56.88	0.000280394	High	59.16	0.000165203	High	60.46	0.000122242
AVLFAVPGAFTPTCSQK	13	1	1	LOC_Os02g09940.1	peroxiredoxin, putative, expressed	T13(Phospho); C14(Carbamidomethyl)	1873.92	1.96329e+07	0	0	3.01136e+07	2.8785e+07								0.988976	T(11): 0.0; T(13): 98.9; S(15): 1.1	0	0.002025	375.818				High	26.38	0.324964	High	26.31	0.339599										High	34.9	0.0448663	High	34.9	0.0445912
AVNPSAVSVGMQPTVSSPR	55	1	1	LOC_Os05g03760.1	zinc finger family protein, putative, expressed	S17(Phospho)	1963.94	2.69312e+08	0	5.42397e+07	2.79884e+08	2.26571e+08	3.01481e+08			4.26852e+07		7.72477e+07	8.54714e+07	0.989269	S(5): 0.0; S(8): 0.0; T(14): 0.0; S(16): 1.1; S(17): 98.9	0	9.396e-10	464.751	High	35.89	0.0653741	High	25.88	0.638722	High	38.53	0.0345092	High	33.14		High	26.81		High	59.52	0.000275139	High	57.29	0.000459129	High	43.33	0.0113737	High
AVPTAGMGPNSPPSR	77	1	1	LOC_Os08g40150.1	AT hook motif domain containing protein, expressed	S11(Phospho)	1518.68	1.16324e+09	3.95552e+08	3.07228e+08	1139805768	1.2416e+09	1.10831e+09	5.00595e+08	6.45909e+08	4.01531e+07	8.62506e+08	5.91779e+07		0.00782611	T(4): 0.0; S(11): 0.8; S(14): 99.2	0	1.01e-05	463.003	High	60.65	0.000111843	High	55.04	0.000407327	High	61.13	0.000101258	High	54.3	0.00047798	High	61.04	0.00010149	High	61.96	8.27834e-05	High	58.02	0.000199095	High	63.05	6.28231e-05	High
AVQLSPSICR	14	3	1	LOC_Os12g02690.3	expressed protein	S7(Phospho); C9(Carbamidomethyl)	1210.57	2.26539e+07	2.22743e+07	0	3.34134e+07	3.45484e+07		3.44485e+07		3.23745e+07				1	S(5): 0.0; S(7): 100.0	0	0.008047	315.622	High	32.77	0.0518669	High	25.47	0.274001	High	15.11	2.98761	High	35.65	0.0263285	High	27.5		High	36.59	0.0212483	High	33.73	0.0418136	High	37.99	0.0153374
AVSPFSR	6	2	1	LOC_Os01g73410.1	FYVE zinc finger domain containing protein, expressed	S3(Phospho)	843.379	5.16264e+07	0	0	8.13156e+07	7.35637e+07								1	S(3): 100.0; S(6): 0.0	0.003	0.06146	227.116	High	29.93	0.0510665																High	30.16	0.0454445	High	35.22	0.0145795	High
AWSGALHVGAR	22	2	1	LOC_Os06g14780.2	expressed protein	S3(Phospho)	1204.56	5.06966e+07	0	3.68285e+07	5.07628e+07	5.14903e+07	4.98366e+07				7.61871e+07	3.42985e+07		1	S(3): 100.0	0	0.0005983	286.265	High	38.61	0.0194118	High	36.54	0.0307775	High	36.48	0.0318016	High	28.61					High	15.99		High	44.65	0.00484674	High	44.51	0.00500375	High
AYSPCITELR	16	1	1	LOC_Os12g37840.1	boron transporter protein, putative, expressed	S3(Phospho); C5(Carbamidomethyl)	1289.56	1.02893e+08	5.40961e+07	4.08506e+07	9.60761e+07	1.00642e+08	1.11962e+08	8.12707e+07		8.10178e+07	5.93038e+07		6.32481e+07	1	Y(2): 0.0; S(3): 100.0; T(7): 0.0	0	0.002842	266.825	High	34.77	0.0384941	High	34.39	0.0416683	High	34.15	0.0432089	High	34.58	0.0428107	High	31.33		High	39.56	0.0134787	High	34.53	0.0405755	High	45.7	0.0031168	High
AYSQIGR	21	1	1	LOC_Os10g30610.1	white-brown complex homolog protein, putative, expressed	S3(Phospho)	874.385	3.07035e+07	0	6.85534e+07	4.70288e+07		4.50818e+07		1.38436e+08		1.14627e+08	9.10333e+07		1	Y(2): 0.0; S(3): 100.0	0.001	0.01561	178.626	High	32.1	0.0564801	High	23.22	0.436411	High	28.57	0.12732	High	27.69		High	38.27	0.0135383	High	27.5		High	36.23	0.0219173	High	30.83		High
CFAGKPSEQDK	17	1	1	LOC_Os06g43840.1	protein kinase domain containing protein, expressed	C1(Carbamidomethyl); S7(Phospho)	1346.55	3.98757e+07	0	0	6.19352e+07		5.76919e+07	2.66721e+07			5.00039e+07			1	S(7): 100.0	0	0.002187	321.924	High	30.21	0.0554527	High	14.21	2.45037	High	17.35	1.07593	High	43.55	0.00278631	High	20.82		High	16.59		High	30.95	0.0476893	High	24.76		High
CSSFELR	4	1	1	LOC_Os12g33090.1	zinc finger family protein, putative, expressed	C1(Carbamidomethyl); S3(Phospho)	978.38	1.70926e+07	0	0	1.60829e+07	1.7359e+07	1.78359e+07					1.1585e+07		0.988871	S(2): 1.1; S(3): 98.9	0.001	0.03681	126.218																			High	34.5	0.0147248	High	37.84	0.00711191	High
CVLVESSSPR	26	2	1	LOC_Os06g39344.2	enoyl-CoA hydratase/isomerase family protein, putative, expressed	C1(Carbamidomethyl); S8(Phospho)	1213.53	1.03067e+08	0	1.18181e+08		1.48613e+08	1.60588e+08					1.78648e+08	1.75895e+08	0.986107	S(6): 0.7; S(7): 0.7; S(8): 98.6	0	0.001654	257.896	High	32.87	0.0458578	High	32.59	0.0489117	High	31.13	0.0686104										High	30.93		High	34.5	0.0315607	High
DAAAAAAAPAPAPAAPAASSPRPR	58	1	1	LOC_Os09g23730.1	HMG-Y-related protein A, putative, expressed	S19(Phospho)	2206.08	4.54321e+09	0	0	4.56509e+09	4.48901e+09	4.57553e+09					8.4491e+08		0.999884	S(19): 100.0; S(20): 0.0	0	2.425e-10	544.841	High	16.34	3.25415																High	46.73	0.0026668	High	43.48	0.00628692	High
DAALLDDGGGGGDGGGEEGSGVGR	7	1	1	LOC_Os03g55704.1	expressed protein	S20(Phospho)	2154.86	0	5.2785e+07	2.64242e+07	1.17321e+07			5.12227e+07	5.44363e+07	5.26959e+07	2.76302e+07	2.35159e+07	2.81264e+07	1	S(20): 100.0	0	1.898e-11	674.345										High	94.59	4.91069e-08	High	100.32	1.34189e-08	High	94.13	5.49221e-08	High	52.52	0.000794576
DADNKGQSSSPTPLFSFK	36	1	1	LOC_Os05g28190.1	ranBP1 domain containing protein, expressed	S10(Phospho)	2005.89	0	7.19337e+07	0	6.9542e+07			7.30739e+07	7.66038e+07	6.61234e+07	7.01612e+07			0.978891	S(8): 0.0; S(9): 1.1; S(10): 97.9; T(12): 1.1; S(16): 0.0	0	3.477e-05	366.317	High	37	0.0336002	High	42.83	0.00858668	High	30.25	0.157564	High	43.65	0.00703808	High	35.47	0.047223	High	46.76	0.00347396	High	41.59	0.0115074	High	30.93		High
DAEEEAEEESGSGAR	27	1	1	LOC_Os04g34600.1	abscisic stress-ripening, putative, expressed	S12(Phospho)	1645.59	1.80942e+08	6.04917e+07	1.42803e+08	168779608	1.74108e+08	1.99939e+08	6.14814e+07	5.66514e+07	6.33424e+07	1.52637e+08	1.36505e+08	1.39266e+08	1	S(10): 0.0; S(12): 100.0	0	3.816e-16	450.407	High	53.85	0.000171639	High	47.13	0.000892691	High	49.44	0.000499987	High	56.47	9.89611e-05	High	46.85	0.000974859	High	36.94	0.00830449	High	72.44	2.39469e-06	High	62.84	2.25678e-05	High
DAGLSPAPIGTLTSALANANPEQQR	22	1	1	LOC_Os04g42600.1	polyadenylate-binding protein, putative, expressed	S5(Phospho)	2572.25	2.18833e+08	0	9.85216e+07	2.48128e+08	1.51883e+08	2.56489e+08				1.20238e+08	1.26185e+08	4.91423e+07	1	S(5): 100.0; T(11): 0.0; T(13): 0.0; S(14): 0.0	0	2.283e-10	478.821	High	69.43	1.84834e-05	High	54.39	0.000593182	High	56.06	0.000403448										High	61.55	0.00011278	High	75.72	4.35097e-06	High
DASAQSPLR	16	1	1	LOC_Os03g04050.1	protein kinase family protein, putative, expressed	S6(Phospho)	1024.45	2.83999e+08	0	0	302938990	2.53948e+08	2.95109e+08	3.01846e+08			4.9602e+08			1	S(3): 0.0; S(6): 100.0	0	0.001155	239.842	High	24.25	0.190737				High	11.63	3.22922	High	30.9	0.0412511	High	24.27					High	30.29	0.047238	High	44.08	0.00199524	High
DASLDHSLVSPTQR	16	1	1	LOC_Os09g30400.3	OsWRKY80 - Superfamily of TFs having WRKY and zinc finger domains, expressed	S10(Phospho)	1605.73	4.91387e+07	0	0	5.77436e+07	4.91781e+07	4.04945e+07							1	S(3): 0.0; S(7): 0.0; S(10): 100.0; T(12): 0.0	0	1.317e-05	516.818	High	27.8	0.246864				High	28.3	0.217651										High	49.3	0.00172357	High	42.81	0.0078095	High
DASLEALPVDELIEK	15	3	1	LOC_Os04g56160.1	plasma membrane ATPase, putative, expressed	S3(Phospho)	1721.82	4.57102e+07	0	7.51458e+07	4.27186e+07	4.37537e+07	5.06585e+07				1.03413e+08	9.33663e+07	2.86578e+07	1	S(3): 100.0	0	1.036e-06	325.84	High	33.73	0.0539721	High	28.8	0.168275	High	36.92	0.0258008	High	31.62		High	31.23		High	31.28		High	37.01	0.0254508	High	45.07	0.00400945	High
DASPGQVNQDSSQEFQPR	11	2	1	LOC_Os01g61860.2	TBC domain containing protein, expressed	S3(Phospho)	2069.87	2.92844e+07	0	1.13983e+07	3.13046e+07	3.55457e+07	2.10029e+07				1.60633e+07	1.81317e+07		1	S(3): 100.0; S(11): 0.0; S(12): 0.0	0	1.129e-08	315.699																			High	43.52	0.00546674	High	66.12	2.9651e-05	High
DASSLGSSSPIQEQNQK	26	1	1	LOC_Os02g58410.1	expressed protein	S9(Phospho)	1855.8	1.28783e+08	3.30094e+08	2.02579e+08	1.9157e+08		1.94778e+08	3.39133e+08	3.19342e+08	3.31808e+08	2.18616e+08	1.81746e+08	2.07374e+08	0.999998	S(3): 0.0; S(4): 0.0; S(7): 0.0; S(8): 0.0; S(9): 100.0	0	9.114e-07	359.653	High	42.72	0.00732086	High	33.23	0.0611519	High	36.07	0.0300067	High	54.22	0.000486488	High	55.44	0.000391061	High	49.25	0.00145354	High	45.66	0.00349334	High	31.97		High
DAYSDADDDDDDRPHAPPGPVDPSK	18	1	1	LOC_Os01g01150.2	RNA recognition motif, putative, expressed	S4(Phospho)	2747.08	0	5.85137e+08	0		3.87552e+08		5.82241e+08	5.35665e+08	6.37506e+08	3.45538e+08			0.5	Y(3): 50.0; S(4): 50.0; S(24): 0.0	0	1.989e-07	402.951	High	33.92	0.0486407	High	34.11	0.0497221	High	50.49	0.00114879	High	41.65	0.00878143	High	48.74	0.00172287	High	42.4	0.00736851	High	30.96		High	39.01	0.0161211	High
DAYVGDEAQSKR	10	11	1	LOC_Os03g50885.1	actin, putative, expressed	S10(Phospho)	1418.59	0	0	2.16935e+07								1.89724e+07	4.61081e+07	1	Y(3): 0.0; S(10): 100.0	0	0.002599	354.152				High	28.19	0.186445	High	10.41	10.8371
DDDGEGLGSPR	34	1	1	LOC_Os02g54730.1	transmembrane amino acid transporter protein, putative, expressed	S9(Phospho)	1197.44	8.52915e+07	1.94257e+08	6.44751e+07	88355744	7.85363e+07	8.89825e+07	2.00591e+08	1.93393e+08	1.88788e+08	1.0438e+08	8.90455e+07		1	S(9): 100.0	0	0.0005131	338.044	High	46.88	0.0015394	High	43.39	0.00346126	High	43.96	0.00302548	High	45.24	0.00224869	High	57.46	0.000134874	High	55.18	0.000229059	High	48.49	0.00106751	High	60.71	7.26049e-05	High
DDESLASSPSVPSYMAPTK	8	1	1	LOC_Os05g03190.1	IQ calmodulin-binding motif domain containing protein, expressed	S8(Phospho)	2061.89	1.64545e+07	0	0	2.86193e+07	2.07442e+07								0.983627	S(4): 0.0; S(7): 1.6; S(8): 98.4; S(10): 0.0; S(13): 0.0; Y(14): 0.0; T(18): 0.0	0	3.365e-07	273.805							High	16.04	3.57151										High	50.49	0.00131495	High	47.99	0.00220093	High
DDGAPVTGGEAGGSDGGNFPR	13	1	1	LOC_Os12g04410.1	BTBA6 - Bric-a-Brac,Tramtrack, Broad Complex BTB domain with Ankyrin repeat region, expressed	S14(Phospho)	2012.81	2.60119e+07	0	0	3.04213e+07	2.8574e+07	1.90402e+07							1	T(7): 0.0; S(14): 100.0	0	2.506e-08	487.101	High	33.91	0.045542				High	28.69	0.174891										High	54.81	0.000386698	High	46.19	0.00278906	High
DDSDEDMESGWDDR	4	1	1	LOC_Os08g36450.1	transcription regulator, putative, expressed	S3(Phospho)	1751.54	0	6.10108e+07	0		1.42894e+07		8.52748e+07	7.10113e+07	2.67462e+07				1	S(3): 100.0; S(9): 0.0	0	7.866e-06	360.665										High	76.86	2.89519e-07	High	75.68	3.86666e-07	High	79.85	1.38191e-07				High	54.57	4.99271e-05
DDVDGSFGSPDHGEAVEK	2	2	1	LOC_Os05g03120.3	retrotransposon protein, putative, unclassified, expressed	S9(Phospho)	1940.76	1.63558e+07	0	0	2.43213e+07		2.47462e+07							1	S(6): 0.0; S(9): 100.0	0	1.102e-07	432.503																			High	54.2	0.000331525				High
DDVFSDSEAEDGSSK	4	1	1	LOC_Os12g21890.1	PTEN, putative, expressed	S5(Phospho)	1667.6	0	1.24469e+07	0			1.78597e+07		1.95141e+07	1.78266e+07				1	S(5): 100.0; S(7): 0.0; S(13): 0.0; S(14): 0.0	0	2.664e-05	264.021													High	37.68	0.00746411	High	31.44	0.0304704				High	17.72		High
DFGSMNMDELLR	15	6	3	LOC_Os09g28310.1 ;LOC_Os06g10880.2 ;LOC_Os08g36790.1	bZIP transcription factor, putative, expressed	S4(Phospho)	1507.6	2.32656e+07	8.2887e+07	3.63732e+08	1.71691e+07	1.94841e+07	3.31438e+07	8.73372e+07	8.73999e+07	7.39239e+07	4.38172e+08	3.40942e+08	3.12082e+08	1	S(4): 100.0	0	8.876e-05	340.194	High	56.88	0.000152401	High	66.04	1.88158e-05	High	70.6	6.39287e-06	High	49.02	0.000927324	High	58.29	0.000106964	High	61.69	5.02471e-05	High	59.74	7.87778e-05	High	65.19	2.2717e-05	High
DFGSMNMDELLR	4	6	3	LOC_Os09g28310.1 ;LOC_Os06g10880.2 ;LOC_Os08g36790.1	bZIP transcription factor, putative, expressed	S4(Phospho); M5(Oxidation)	1523.59	0	0	1.47748e+07							1.18481e+07	9.66782e+06	2.28086e+07	1	S(4): 100.0	0	0.000284	277.549
DGASDPDVDKK	18	1	1	LOC_Os07g38360.2	expressed protein	S4(Phospho)	1226.5	0	0	3.03519e+07							4.91514e+07	4.19042e+07		1	S(4): 100.0	0	0.0002754	295.261	High	15.54	1.83889	High	14.83	1.90405	High	16.35	1.35799	High	29.51		High	9.39		High	29.09		High	29.83		High	24.49		High
DGASSPFAAALSEEER	15	2	1	LOC_Os03g15050.2	phosphoenolpyruvate carboxykinase, putative, expressed	S5(Phospho)	1716.72	1.70884e+08	6.7568e+07	1.01031e+08	1.80683e+08	1.58246e+08	1.73723e+08	6.75747e+07	5.75696e+07	7.75596e+07	1.12472e+08	9.39449e+07	9.66766e+07	0.999994	S(4): 0.0; S(5): 100.0; S(12): 0.0	0	1.472e-06	248.367				High	50.52	0.000951918	High	70.26	1.01442e-05	High	66.81	1.94691e-05	High	54.4	0.000389583	High	58.15	0.000164898	High	56.9	0.000222141	High	54.44	0.00041677	High
DGAVASFSK	11	1	1	LOC_Os10g21000.1	nucleoside-triphosphatase, putative, expressed	S6(Phospho)	961.406	0	1.3168e+08	0	105047224				2.03424e+08	1.91615e+08			1.28346e+08	0.999871	S(6): 100.0; S(8): 0.0	0	0.005188	228.748	High	15.64	3.45079	High	25.1	0.390768	High	37.7	0.0214573	High	30.15		High	40.97	0.0101859	High	35.84	0.0331894	High	50.14	0.0012331
DGDEVDDGAQDSDIR	14	3	1	LOC_Os07g05610.4	zinc ion binding protein, putative, expressed	S12(Phospho)	1686.62	0	2.84595e+07	0			2.37801e+07	3.65507e+07		4.88279e+07	4.10683e+07			1	S(12): 100.0	0	1.289e-05	379.39	High	46.93	0.000889139	High	28.92	0.0554608	High	36.36	0.00966443	High	29.5	0.0453856	High	26.4		High	35.42	0.0118133				High	21.88		High
DGDPGGKSPPTLEVTDGK	48	1	1	LOC_Os03g64320.1	expressed protein	S8(Phospho)	1849.83	2.72035e+08	0	0	3.39441e+08	3.24507e+08	1.52158e+08							0.9999	S(8): 100.0; T(11): 0.0; T(15): 0.0	0	6.743e-06	477.065	High	38.47	0.0209082	High	35.03	0.0458357	High	44.47	0.00519475	High	27.52		High	27.92		High	26.94		High	45.93	0.0037563	High	44.77	0.00486469	High
DGEEGDENVASEEEDEEDGLK	11	2	1	LOC_Os08g03390.2	pre-mRNA-splicing factor SLU7, putative, expressed	S11(Phospho)	2374.86	3.89024e+07	2.89458e+07	0	3.87714e+07	3.91393e+07	3.87963e+07	4.20488e+07	4.47886e+07					1	S(11): 100.0	0	1.861e-10	491.875	High	68.68	8.77485e-06	High	82.3	3.90698e-07	High	74.51	2.55232e-06	High	80	6.83e-07	High	67.87	1.10149e-05				High	80.67	5.87928e-07	High	78.14	1.05812e-06	High
DGGDGGAYGDASGDDGR	20	1	1	LOC_Os02g12850.1	RNA recognition motif containing protein, expressed	S12(Phospho)	1621.54	9.28778e+06	2.55626e+07	3.53885e+07		1.58276e+07	1.20358e+07	1.17715e+07	3.34223e+07	3.1494e+07	3.64553e+07	3.36874e+07	3.60229e+07	1	Y(8): 0.0; S(12): 100.0	0	2.473e-05	429.035	High	52.59	0.000202973	High	38.7	0.0046809	High	48.38	0.000535103	High	37.16	0.00667313	High	48.05	0.000549146	High	57.86	5.67975e-05	High	28.22		High	36.93	0.00728952	High
DGGDGGAYGDASGDDGRAPGGDSSGK	28	1	1	LOC_Os02g12850.1	RNA recognition motif containing protein, expressed	S12(Phospho)	2377.88	1.00143e+08	0	1.47317e+08	1.5727e+08	1.43161e+08		1.56525e+08			1.51681e+08	1.28944e+08	1.61326e+08	1	Y(8): 0.0; S(12): 100.0; S(23): 0.0; S(24): 0.0	0	4.449e-07	392.351	High	22.23	0.522114	High	15.61	2.27388	High	45.18	0.00251661	High	45.1	0.00265302	High	28.31		High	25.63		High	51.97	0.000531454	High	37.25	0.0162088	High
DGGGSAGEEEEEHDVGTK	14	1	1	LOC_Os03g62340.1	protein kinase family protein, putative, expressed	S5(Phospho)	1882.7	1.66923e+07	0	1.79733e+07	1.69979e+07	1.64944e+07	1.65846e+07	2.93523e+07			2.00187e+07	1.46618e+07	1.92393e+07	1	S(5): 100.0; T(17): 0.0	0	7.048e-08	418.928	High	39.99	0.00737196	High	41.8	0.00453566				High	47.55	0.00122351				High	7.34		High	59.49	8.45703e-05	High	33.64	0.0309247	High
DGGGYGGGGGDRYSR	9	1	1	LOC_Os03g61990.2	glycine-rich RNA-binding protein 7, putative, expressed	S14(Phospho)	1510.57	0	0	7.65271e+07			4.04457e+07			9.78413e+07	8.35353e+07	6.7458e+07	7.85881e+07	0.990458	Y(5): 0.0; Y(13): 1.0; S(14): 99.0	0	0.006911	388.595																High	38.56	0.00858185	High	28.49		High	30.88		High
DGGSPAKPGSPK	22	1	1	LOC_Os08g41400.1	expressed protein	S10(Phospho)	1177.53	0	7.54e+07	0				9.47155e+07	1.31485e+08		9.42987e+07			1	S(4): 0.0; S(10): 100.0	0	0.001928	334.818	High	32.6	0.0547617	High	30.36	0.0871206				High	44.85	0.00307537	High	33.88	0.03845	High	30.29		High	31.29		High	29.25		High
DGGSPAKPGSPK	18	1	1	LOC_Os08g41400.1	expressed protein	S4(Phospho); S10(Phospho)	1257.49	9.9005e+07	0	1.29156e+08	1.52537e+08		1.44478e+08	2.12553e+08				1.96949e+08	1.90518e+08	1	S(4): 100.0; S(10): 100.0	0	0.01888	348.446	High	24.07	0.195283	High	27.48	0.0886991	High	34.9	0.0156296	High	31.39	0.0353614	High	23.3		High	17.02		High	31.66	0.0332299	High	26.83		High
DGLPAAAAAAAAASPLLAHSSALQQK	6	1	1	LOC_Os05g06350.1	importin subunit alpha, putative, expressed	S14(Phospho)	2481.26	7.86705e+07	0	0	1.20278e+08	1.15733e+08								0.333333	S(14): 33.3; S(20): 33.3; S(21): 33.3	0	5.163e-10	337.554																			High	35.47	0.0285353	High	37.69	0.0172088	High
DGNAATIKEDAK	31	2	1	LOC_Os07g49330.1	phospholipase C, putative, expressed	T6(Phospho)	1312.58	5.94144e+08	1.42537e+09	6.70559e+08	5.99534e+08	5.96729e+08	5.8617e+08	1.52744e+09	1.35375e+09	1.39491e+09	6.90856e+08	6.58923e+08	6.61899e+08	1	T(6): 100.0	0	8.992e-06	517.302	High	54.18	0.000358455	High	62.13	5.72241e-05	High	51.35	0.000685557	High	67.03	1.63575e-05	High	69.24	1.11798e-05	High	60.25	7.77434e-05	High	52.84	0.000428217	High	52.92	0.000480385	High
DGNKDEAEEEEVSEADK	10	1	1	LOC_Os03g40010.1	DEK C terminal domain containing protein, expressed	S13(Phospho)	1973.75	1.77937e+07	6.83296e+07	1.02675e+07	26835000		2.6546e+07	6.80101e+07	6.20072e+07	7.49716e+07	1.54927e+07		1.53098e+07	1	S(13): 100.0	0	1.236e-06	534.602										High	79.02	1.20991e-06	High	63.7	4.11436e-05	High	70.2	9.23478e-06	High	75.61	2.6476e-06				High
DGNKDEAEEEEVSEADKK	21	1	1	LOC_Os03g40010.1	DEK C terminal domain containing protein, expressed	S13(Phospho)	2101.85	0	0	1.30991e+08			1.44789e+08			3.59035e+08	8.08063e+07	1.5231e+08	1.59855e+08	1	S(13): 100.0	0	7.528e-09	467.006	High	27.24	0.220895	High	38.01	0.018216	High	26.5	0.252975	High	34.6	0.0418511	High	26.12		High	84.94	3.84913e-07	High	28.25		High	22.5		High
DGPEGSPAAADEAADK	14	1	1	LOC_Os03g51520.2	fip1 motif family protein, expressed	S6(Phospho)	1580.62	2.75907e+07	8.386e+07	5.85108e+07	4.18957e+07	4.08765e+07		8.43225e+07	8.51729e+07	8.20845e+07	6.45417e+07	5.18405e+07	5.91502e+07	1	S(6): 100.0	0	6.556e-07	359.458				High	43	0.00369876	High	65.13	2.16826e-05	High	69.93	7.48467e-06	High	61.19	5.5998e-05	High	59.7	7.92924e-05	High	76.69	1.5761e-06	High	51.97	0.000478087
DGQPAGTDGCITSPMQSSSPK	8	1	1	LOC_Os04g43130.1	transcriptional corepressor LEUNIG, putative, expressed	C10(Carbamidomethyl); S19(Phospho)	2200.89	2.92624e+07	0	0	5.22677e+07	3.55195e+07								0.999846	T(7): 0.0; T(12): 0.0; S(13): 0.0; S(17): 0.0; S(18): 0.0; S(19): 100.0	0	1.618e-12	412.791																			High	58.31	0.000220471	High	48.01	0.00241378	High
DGSQTEPCEASETPYQTHEER	20	2	1	LOC_Os02g46956.2	expressed protein	S3(Phospho); C8(Carbamidomethyl)	2530.97	0	0	4.38711e+07		5.67401e+07					4.91506e+07	3.93996e+07	4.30632e+07	0.999819	S(3): 100.0; T(5): 0.0; S(11): 0.0; T(13): 0.0; Y(15): 0.0; T(17): 0.0	0	1.084e-08	335.143	High	27.01	0.192896	High	20.93	0.747903	High	20.83	0.778954	High	12.52		High	31.69		High	16.2		High	24.6		High	47.46	0.00178307	High
DGSSFGLTPK	36	1	1	LOC_Os04g28090.1	MYB family transcription factor, putative, expressed	T8(Phospho)	1088.47	4.38776e+07	0	4.349e+07		7.25748e+07	5.90579e+07			7.61227e+07		6.77729e+07	6.2697e+07	1	S(3): 0.0; S(4): 0.0; T(8): 100.0	0	0.0009722	287.876	High	29.85	0.0645929	High	38.22	0.0093937	High	33.59	0.0272795	High	28.4		High	26.92		High	44.08	0.00243885	High	21.24		High	37.25	0.0117446	High
DHASSSNADSVMAEAEPASNAADDKK	50	1	1	LOC_Os03g13970.1	26S proteasome non-ATPase regulatory subunit 4, putative, expressed	S6(Phospho)	2698.1	6.47214e+07	0	0	6.78419e+07	6.08904e+07	6.5432e+07							0.496566	S(4): 0.7; S(5): 49.7; S(6): 49.7; S(10): 0.0; S(19): 0.0	0	7.621e-14	505.77	High	38.23	0.022006	High	35.75	0.0373167	High	33.72	0.0608692										High	50.99	0.00117553	High	49.27	0.00176096	High
DIAASPTSSR	27	2	1	LOC_Os03g57854.1	MBTB3 - Bric-a-Brac, Tramtrack, Broad Complex BTB domain with Meprin and TRAF Homology MATH domain, expressed	S5(Phospho)	1084.47	1.8926e+08	0	2.8587e+08	266794812		3.00984e+08				3.02597e+08	2.82059e+08	2.72953e+08	1	S(5): 100.0; T(7): 0.0; S(8): 0.0; S(9): 0.0	0	0.006461	350.398	High	33.89	0.0250096	High	31.6	0.0423746	High	34.14	0.0244201	High	30.62		High	29.53		High	23.58		High	32.96	0.0309818	High	30.61		High
DIASPTSSQSVVLSSGR	23	1	1	LOC_Os05g37500.1	expressed protein	S4(Phospho)	1770.84	2.81015e+07	1.43077e+07	4.2142e+07	42940250	2.02487e+07	2.11156e+07	2.28944e+07	7.8611e+06	1.21677e+07	4.42168e+07	4.31147e+07	3.90944e+07	1	S(4): 100.0; T(6): 0.0; S(7): 0.0; S(8): 0.0; S(10): 0.0; S(14): 0.0; S(15): 0.0	0	2.16e-09	384.089	High	58.59	0.00019536	High	60.1	0.000137009	High	45.36	0.00409392	High	44.87	0.00463829	High	41.57	0.00979805	High	58.17	0.000214358	High	97.4	2.62947e-08	High	97.2	2.70766e-08	High
DIEASAPEGGEFSAK	10	4	1	LOC_Os02g41860.3	aquaporin protein, putative, expressed	S13(Phospho)	1587.66	0	1.55299e+07	0				3.05819e+07	1.6008e+07					1	S(5): 0.0; S(13): 100.0	0	0.003007	295.44				High	10.58	7.32799				High	33.16	0.0404079	High	47.35	0.00160331	High	29.26					High	21.59		High
DIFAGSESMSPR	22	1	1	LOC_Os03g10180.1	expressed protein	S10(Phospho)	1376.56	4.141e+07	0	4.76108e+07	5.04283e+07	4.93795e+07	2.44221e+07		1.83975e+07		6.13914e+07	5.88401e+07	2.26008e+07	0.999928	S(6): 0.0; S(8): 0.0; S(10): 100.0	0	1.798e-11	355.674	High	43.53	0.00289898	High	33.32	0.0442772	High	21.77	0.430764	High	19.58		High	39.16	0.0080569	High	20.26		High	54.08	0.000255415	High	54.48	0.000236505	High
DIHPEPSPPHLPPPPLR	52	1	1	LOC_Os07g10780.1	remorin, putative, expressed	S7(Phospho)	1975.98	1.41875e+08	0	8.22993e+07	1.8479e+08	1.26364e+08	1.14471e+08				1.82122e+08	2.87802e+07	3.59956e+07	1	S(7): 100.0	0	6.89e-07	459.07	High	41.29	0.00940291	High	26.7	0.273125	High	34.87	0.0412346	High	18.4		High	28.02		High	20.33		High	42.67	0.00675132	High	45.15	0.00379879	High
DIHPLTPPSPTTTTTPPTR	47	1	1	LOC_Os03g59360.1	remorin, putative, expressed	T11(Phospho)	2110.03	1.62593e+08	0	2.74046e+08	286699443	9.1322e+07	1.09759e+08				3.60282e+08	2.63967e+08	1.9789e+08	0.491406	T(6): 0.0; S(9): 0.6; T(11): 49.1; T(12): 49.1; T(13): 0.6; T(14): 0.6; T(15): 0.0; T(18): 0.0	0	1.187e-05	414.935	High	36.95	0.0305682	High	38.1	0.0230386	High	32.54	0.0832157	High	33.87					High	33.83		High	53.11	0.000728092	High	63.83	6.15204e-05	High
DIMGLGGSDDEDPAAAAAAAAPAQR	13	1	1	LOC_Os06g10880.2	bZIP transcription factor, putative, expressed	S8(Phospho)	2421.05	2.3461e+07	4.66662e+07	7.22236e+07	32576856		3.78062e+07	4.79709e+07	5.58692e+07	3.61584e+07	7.86542e+07	7.59236e+07	6.20932e+07	1	S(8): 100.0	0	3.279e-07	430.657										High	69.71	1.72439e-05	High	60.73	0.000142725	High	71.66	1.10505e-05	High	44.98	0.00505123				High
DKESLGNVPASPSFSAWNAAPVSQGNER	5	1	1	LOC_Os02g05880.1	RNA polymerase Rpb1, domain 2 family protein, expressed	S11(Phospho)	2995.37	4.20599e+07	0	0	4.47805e+07	4.11428e+07	4.02563e+07							0.999413	S(4): 0.0; S(11): 99.9; S(13): 0.1; S(15): 0.0; S(23): 0.0	0	6.184e-10	291.555																			High	43.95	0.00754088	High	46.14	0.00452147	High
DLAPQTEAFVDRPPTADGSGPPGGAVK	78	1	1	LOC_Os02g54700.2	RNA recognition motif containing protein, putative, expressed	T15(Phospho)	2730.29	2.68419e+09	8.52644e+08	1.29528e+09	3.01438e+09	2.48035e+09	2.55784e+09	1.02866e+09	5.4741e+08	9.81864e+08	2.32447e+09	1.56137e+09		1	T(6): 0.0; T(15): 100.0; S(19): 0.0	0	3.956e-11	484.456	High	39.02	0.0239037	High	35.92	0.0483061	High	37.1	0.0372225	High	35.92	0.0481398	High	39.67	0.0203004	High	37.46	0.0337948	High	57.07	0.000364203	High	57.44	0.000337976	High
DLEILPTGNAALPSSPEKK	52	1	1	LOC_Os08g01300.1	zinc finger DHHC domain-containing protein, putative, expressed	S15(Phospho)	2060.05	8.85378e+07	0	7.4944e+07	1.0323e+08	8.36275e+07	7.87555e+07	6.02662e+07			7.25002e+07	7.73675e+07	7.49642e+07	0.988891	T(7): 0.0; S(14): 1.1; S(15): 98.9	0	9.719e-06	446.435	High	65.02	4.0244e-05	High	42.22	0.00749139	High	39.3	0.0166894	High	69.42	1.42517e-05	High	31.49		High	25.68		High	65.38	3.73033e-05	High	65.21	3.79789e-05	High
DLFGMPKSPPAAAAAPPQSVR	10	1	1	LOC_Os08g40150.1	AT hook motif domain containing protein, expressed	S8(Phospho)	2188.07	1.30986e+08	0	0	1.33282e+08	1.28515e+08	1.31161e+08					3.61369e+07		1	S(8): 100.0; S(19): 0.0	0	2.137e-08	436.083																			High	48.07	0.00278146	High	43.55	0.00758618	High
DLGGGSVVAGEAK	11	1	1	LOC_Os05g28190.1	ranBP1 domain containing protein, expressed	S6(Phospho)	1239.56	0	4.90803e+07	2.13106e+07			3.48125e+07	4.86734e+07	4.90246e+07	4.95428e+07	3.34066e+07	3.05252e+07		1	S(6): 100.0	0	0.0004278	297.315	High	59.34	0.000102327							High	50.82	0.000754255	High	58.74	0.000118556	High	49.83	0.00091773	High	32.03					High
DLGNAASLLVGSPVSSSMSK	4	1	1	LOC_Os12g33090.1	zinc finger family protein, putative, expressed	S12(Phospho)	1999.96	2.30817e+07	0	0	22464416	1.72857e+07	2.9495e+07							0.999997	S(7): 0.0; S(12): 100.0; S(15): 0.0; S(16): 0.0; S(17): 0.0; S(19): 0.0	0	2.419e-08	416.78																			High	60.56	0.000150533	High	73.77	7.42764e-06	High
DLSVSSDDLHSDAK	7	2	1	LOC_Os02g11750.3	RNA recognition motif containing protein, putative, expressed	S6(Phospho)	1568.66	0	1.58397e+08	0				2.36044e+08		2.39148e+08				0.999999	S(3): 0.0; S(5): 0.0; S(6): 100.0; S(11): 0.0	0	2.005e-05	358.987							High	35	0.033362	High	43.57	0.00463936	High	19.41		High	42.74	0.00563503
DMNSLYQSPHEAR	3	1	1	LOC_Os03g50090.4	transposon protein, putative, CACTA, En/Spm sub-class, expressed	S8(Phospho)	1627.66	0	0	1.30224e+07					2.71423e+07		2.02033e+07	1.88638e+07		0.999937	S(4): 0.0; Y(6): 0.0; S(8): 100.0	0	2.979e-13	318.156													High	36.61	0.0178111
DMSGNASTTSTDGDKR	12	1	1	LOC_Os03g51220.1	SWI/SNF-related matrix-associated actin-dependent regulator of chromatin subfamily C member, putative, expressed	S10(Phospho)	1722.66	8.94889e+06	0	0		1.27358e+07	1.41109e+07			3.96533e+07				0.978595	S(3): 0.0; S(7): 0.0; T(8): 0.0; T(9): 1.1; S(10): 97.9; T(11): 1.1	0	5.888e-05	363.254							High	16.78	1.86596							High	33.79	0.0368317				High	52.36	0.000515138	High
DNDLSEPHDTNDEEEGNSDSSSVR	6	1	1	LOC_Os09g36090.1	plus-3 domain containing protein, expressed	S18(Phospho)	2728.02	2.13257e+07	0	0		3.05756e+07	3.34015e+07							0.999782	S(5): 0.0; T(10): 0.0; S(18): 100.0; S(20): 0.0; S(21): 0.0; S(22): 0.0	0	6.13e-06	394.349													High	9.72					High	30		High	34.62	0.033548	High
DNLQGSAFLGSSR	12	3	1	LOC_Os07g06130.2	ethylene-insensitive protein, putative, expressed	S12(Phospho)	1431.63	0	2.5224e+07	7.01634e+07				1.34772e+07	3.16133e+07	3.05815e+07	8.64356e+07	5.75812e+07	6.64735e+07	0.0115307	S(6): 0.0; S(11): 98.8; S(12): 1.2	0	0.0003301	264.609										High	59.32	0.000110459	High	43.14	0.00467575	High	71	7.49052e-06	High	13.99
DNNPVSPGKGEGR	28	1	1	LOC_Os09g36090.1	plus-3 domain containing protein, expressed	S6(Phospho)	1406.61	0	3.78037e+08	0		2.53902e+08		3.75496e+08	3.60876e+08	3.97739e+08				1	S(6): 100.0	0	0.000484	408.796	High	34.59	0.0344756	High	41.78	0.00657438	High	26.98	0.198743	High	40.65	0.00853675	High	43.2	0.00480545	High	42.26	0.00599938	High	28.05		High	33.36	0.0469852	High
DNTVEDGKEPEPIGTTSSMDTIEVK	19	1	1	LOC_Os01g59670.1	expressed protein	S18(Phospho)	2772.22	0	6.97646e+07	0					9.95658e+07	1.09728e+08				0.4949	T(3): 0.0; T(15): 0.0; T(16): 1.0; S(17): 49.5; S(18): 49.5; T(21): 0.0	0	3.31e-07	304.439	High	27.49	0.428929	High	37.83	0.0458684				High	28.63		High	40.8	0.0202867	High	38.87	0.0311712	High	31.85		High	23.54		High
DNVALPSDSFKK	40	2	1	LOC_Os05g07130.2	6PF-2-K/Fru-2,6-P2ASE liver isozyme, putative, expressed	S9(Phospho)	1400.65	1.06219e+09	8.03542e+08	0	1.07001e+09	1.03035e+09	1.08622e+09	8.03518e+08	8.06783e+08	8.00326e+08				0.999999	S(7): 0.0; S(9): 100.0	0	0.002475	342.691	High	33.91	0.0668599	High	43.84	0.00682561	High	34.51	0.0575246	High	35.29	0.0486593	High	35.74	0.0432031	High	39.11	0.0201914	High	36.36	0.0379872	High	36.42	0.0375116	High
DPSPEPQQQPYDDLEDDLGDDWNR	9	1	1	LOC_Os01g05420.1	IWS1 C-terminus family protein, putative, expressed	S3(Phospho)	2924.15	0	4.7245e+07	0			5.08541e+07	8.69609e+07		5.47741e+07			2.70125e+07	1	S(3): 100.0; Y(11): 0.0	0	1.854e-06	392.278	High	52.54	0.000840793				High	47.51	0.00260362	High	39.76	0.0158787	High	29.27		High	44.73	0.00515536							High
DQDDITSPK	68	1	1	LOC_Os02g03840.2	expressed protein	S7(Phospho)	1098.44	0	1.3735e+09	0	1808724492				2.06817e+09	2.05234e+09				0.999958	T(6): 0.0; S(7): 100.0	0	0.007543	311.672	High	33.96	0.0240874	High	30.55	0.0497352	High	29.28	0.0709963	High	27.81		High	34.53	0.019909	High	33.95	0.0227132	High	37.05	0.0111343	High	28.2		High
DQLEGGGGAHGPEVVADEEVTSHR	41	1	1	LOC_Os10g31040.1	Citrate transporter protein, putative, expressed	S22(Phospho)	2526.1	0	9.2475e+07	7.75949e+07				9.74632e+07	7.36589e+07	1.06303e+08	1.12615e+08	1.2017e+08		0.999825	T(21): 0.0; S(22): 100.0	0	3.816e-16	460.176	High	27.7	0.344574	High	18.94	2.56054	High	23.64	0.878652	High	43.56	0.00892784	High	44.17	0.00770818	High	40.39	0.0184011	High	15.51		High	23.76		High
DQSGVMTAETGTYR	11	4	1	LOC_Os07g29330.3	serine/threonine-protein kinase CTR1, putative, expressed	T7(Phospho)	1595.65	0	1.37481e+08	1.12871e+08				1.35481e+08	1.45916e+08	1.31047e+08	120877539	1.05763e+08	1.11971e+08	1	S(3): 0.0; T(7): 100.0; T(10): 0.0; T(12): 0.0; Y(13): 0.0	0	2.285e-06	414.657	High	52.73	0.000416001	High	49.13	0.000942618	High	48.1	0.00119801	High	34.49	0.0284149	High	47.61	0.00134283	High	36.06	0.0203892
DQSVNQVTSPVAASEPVGSILPK	32	2	1	LOC_Os01g15460.3	zinc finger C-x8-C-x5-C-x3-H type family protein, expressed	S9(Phospho)	2403.18	1.73132e+08	0	8.15062e+07	1.21157e+08	1.57626e+08	2.40613e+08	3.96415e+07			1.78555e+08	6.59639e+07		0.999995	S(3): 0.0; T(8): 0.0; S(9): 100.0; S(14): 0.0; S(19): 0.0	0	3.154e-10	340.06	High	24.27	0.62252	High	63.57	7.22387e-05	High	47.88	0.00267856	High	49.98	0.00165611				High	9.81		High	67.79	2.71469e-05	High	55.56	0.000436554	High
DRWGSPDPYGR	9	1	1	LOC_Os03g16800.1	clathrin assembly protein, putative, expressed	S5(Phospho)	1385.57	0	9.5917e+08	0					1.47748e+09	1.40003e+09				1	S(5): 100.0; Y(9): 0.0	0.001	0.01396	292.011	High	27.83	0.119409										High	31.81	0.0480538	High	44.19	0.00278559				High	24.97		High
DSDDDTNAASVTR	5	1	1	LOC_Os09g07900.1	ubiquitin-protein ligase 1, putative, expressed	S2(Phospho)	1446.54	0	9.72325e+06	0					1.76121e+07	1.15576e+07	6.68138e+06			1	S(2): 100.0; T(6): 0.0; S(10): 0.0; T(12): 0.0	0	4.623e-06	221.227	High	28.85	0.0627475	High	68.43	6.96212e-06							High	51.33	0.000366999	High	39.45	0.00560695
DSEDSPVADADGGK	7	1	1	LOC_Os03g22730.1	nucleolar protein NOP5-1, putative	S5(Phospho)	1442.53	0	4.5965e+07	8.86769e+07			2.08012e+07	6.74093e+07		7.04858e+07	9.65893e+07	8.28107e+07	8.66307e+07	1	S(2): 0.0; S(5): 100.0	0	1.749e-06	335.894										High	69.97	3.96731e-06				High	52.11	0.000220233							High
DSELTNEDEKPIAPKPNDQVPEVSPDLGSPIK	27	1	1	LOC_Os03g26630.2	SAP domain containing protein, expressed	S29(Phospho)	3538.7	8.7505e+07	0	0		1.25909e+08	1.36606e+08		2.29456e+08				1.13532e+08	1	S(2): 0.0; T(5): 0.0; S(24): 0.0; S(29): 100.0	0	2.014e-10	549.815	High	30.18	0.167847	High	30.5	0.148126	High	34.99	0.0546909	High	34.03		High	36.05	0.0415925	High	30.99		High	31.82		High	39.37	0.0196597	High
DSGSGAELGEEQPNEAGAGK	14	1	1	LOC_Os01g52090.2	transcription factor like protein, putative, expressed	S4(Phospho)	1982.8	1.21633e+07	0	0		1.62816e+07	2.02084e+07			1.87593e+07				0.5	S(2): 50.0; S(4): 50.0	0	7.425e-07	359.186				High	57.91	0.000221515	High	50.25	0.00116356							High	43.78	0.0057291				High	55.53	0.000353931	High
DSLMQETDLSPSTASHK	22	1	1	LOC_Os02g34500.1	expressed protein	S10(Phospho)	1926.82	4.48009e+07	0	0	6.97941e+07	6.46086e+07				5.6451e+07				0.99966	S(2): 0.0; T(7): 0.0; S(10): 100.0; S(12): 0.0; T(13): 0.0; S(15): 0.0	0	1.152e-07	414.25	High	16.95	2.45131	High	28.84	0.170521	High	36.76	0.0272013	High	24.85		High	25.38		High	38.53	0.0181033	High	35.36	0.0378539	High	52.04	0.000808973	High
DSNNEASGTSLTR	18	2	1	LOC_Os07g47350.2	potassium transporter, putative, expressed	S10(Phospho)	1431.58	1.00459e+08	0	1.59473e+08	1.20625e+08	1.06195e+08	7.45579e+07			2.31371e+08	1.7326e+08	1.55017e+08	1.50142e+08	0.992597	S(2): 0.0; S(7): 0.0; T(9): 0.0; S(10): 99.3; T(12): 0.7	0	1.322e-06	336.67							High	51.06	0.000480634							High	67.96	9.15747e-06	High	63.67	2.70608e-05	High	77.71	1.06235e-06	High
DSPMTTFSVLEGAGR	15	1	1	LOC_Os01g64300.1	DUF584 domain containing protein, putative, expressed	S8(Phospho)	1647.71	3.05169e+07	0	1.95207e+07	3.18795e+07	2.8202e+07	3.14693e+07		1.9981e+07		3.06676e+07		2.78945e+07	1	S(2): 0.0; T(5): 0.0; T(6): 0.0; S(8): 100.0	0	7.059e-06	358.52	High	42.7	0.00673975	High	60.9	0.000101766	High	71.78	8.31006e-06	High	26.1		High	36.16	0.0323813	High	25.59		High	53.59	0.00056681	High	44.33	0.00482623	High
DSQSVLALPGTPSNK	21	1	1	LOC_Os03g14250.1	plant protein of unknown function DUF869 domain containing protein, expressed	T11(Phospho)	1593.76	1.94198e+08	0	7.31672e+07	2.11597e+08	1.50237e+08	2.2076e+08				8.76647e+07	8.40118e+07	4.78252e+07	0.990568	S(2): 0.0; S(4): 0.0; T(11): 99.1; S(13): 0.9	0	2.74e-05	317.298	High	27.81	0.198444	High	9.64	12.9937				High	33.76		High	29.72		High	21.07		High	34.06	0.0470585	High	39.06	0.0149309	High
DSSSSVNEELR	12	1	1	LOC_Os01g56790.1	expressed protein	S4(Phospho)	1302.52	2.2883e+07	2.23503e+07	0	2.24388e+07	2.00864e+07	2.61238e+07	3.74125e+07		2.96385e+07		9.62662e+06		0.988518	S(2): 0.0; S(3): 0.0; S(4): 98.9; S(5): 1.1	0	0.005555	199.579	High	48.21	0.000933985	High	46.74	0.00130915	High	41.83	0.00409763	High	45.71	0.0016958	High	25.95		High	35.07	0.0190748	High	39.1	0.00768303	High	55	0.000204916	High
DTNSEPEAQLELEK	12	1	1	LOC_Os01g13470.1	KH domain containing protein, putative, expressed	S4(Phospho)	1682.72	0	7.12714e+06	0					1.33391e+07	8.04233e+06				1	T(2): 0.0; S(4): 100.0	0	0.0001536	256.626				High	5.92	32.9674				High	33.8		High	39.73	0.013637	High	45.93	0.00322151				High	13.44		High
DTSPILDTMESGR	20	1	1	LOC_Os08g27040.1	lipid phosphatase protein, putative, expressed	S11(Phospho)	1501.63	5.41506e+07	3.64596e+07	0	8.87514e+07		7.37005e+07		7.70245e+07	3.23544e+07			5.78128e+07	1	T(2): 0.0; S(3): 0.0; T(8): 0.0; S(11): 100.0	0	0.0004478	378.591	High	43.91	0.00367831	High	33.06	0.0452789	High	32.38	0.0509014	High	29.54		High	37.86	0.0151815	High	43.17	0.00440259	High	48.56	0.0012622	High	33.61	0.0398493	High
DTSSDTELEQPK	8	1	1	LOC_Os03g53630.1	PHD finger family protein, putative, expressed	S4(Phospho)	1429.58	4.56676e+07	0	0		5.8177e+07	7.88259e+07						1.24339e+08	0.999849	T(2): 0.0; S(3): 0.0; S(4): 100.0; T(6): 0.0	0	1.665e-05	241.145	High	53.37	0.000402725	High	48.22	0.00135293																High	40.04	0.00872923	High
DTSSSDVSASHVGR	7	2	1	LOC_Os01g55360.4	phosphatidate cytidylyltransferase, putative, expressed	S3(Phospho)	1484.6	0	1.03593e+07	0				1.55185e+07		1.55595e+07				0.499916	T(2): 0.0; S(3): 50.0; S(4): 50.0; S(5): 0.0; S(8): 0.0; S(10): 0.0	0	2.995e-05	238.631										High	50.78	0.000902869				High	61.36	7.87437e-05							High
DVAVSPPGTVLKPILEQK	6	1	1	LOC_Os04g55230.1	tetratricopeptide repeat domain containing protein, putative, expressed	S5(Phospho)	1971.06	2.51082e+07	0	0	3.941e+07	3.59145e+07								1	S(5): 100.0; T(9): 0.0	0	1.132e-05	397.877																			High	35.72	0.0192364	High	36.71	0.0155392	High
DVDDADSDLEEEIQDVPR	2	1	1	LOC_Os07g01320.1	expressed protein	S7(Phospho)	2139.86	9.30558e+06	0	0		1.27331e+07	1.51837e+07							1	S(7): 100.0	0	1.121e-11	485.278																						High	92.4	1.02946e-07	High
DVFADLGSPVSPLR	6	1	1	LOC_Os05g50990.1	TTL3, putative, expressed	S11(Phospho)	1552.76	1.42041e+07	0	0	1.56608e+07	6.97579e+06	1.99758e+07							0.999999	S(8): 0.0; S(11): 100.0	0	4.952e-05	373.61	High	30.75	0.102272	High	17.83	2.01817													High	46.17	0.00284783	High	43.51	0.005232	High
DVFGESDEDEPAPYR	10	1	1	LOC_Os12g38970.1	VIP4, putative, expressed	S6(Phospho)	1805.69	1.43869e+07	3.20111e+07	1.97273e+07	14984963	1.68005e+07	1.13752e+07	3.01573e+07	3.20053e+07	3.38709e+07	2.43552e+07	1.7509e+07	1.73177e+07	1	S(6): 100.0; Y(14): 0.0	0	7.186e-06	304.297				High	46.26	0.0017354				High	73.43	3.32512e-06	High	60.1	7.16804e-05	High	49.36	0.000850543	High	48.93	0.000973609	High	54.52	0.000263828	High
DVFGESDEDGPAPYR	4	1	1	LOC_Os07g01880.1	VIP4, putative, expressed	S6(Phospho)	1733.67	0	2.01684e+07	0				1.71362e+07	2.0407e+07	2.2962e+07			4.47513e+06	1	S(6): 100.0; Y(14): 0.0	0	1.534e-05	307.568										High	74.14	3.43076e-06	High	70.44	8.17803e-06	High	58.88	0.000115442
DVSAGTDMEK	23	1	1	LOC_Os10g42190.1	leucine rich repeat containing protein, expressed	S3(Phospho)	1132.43	0	0	5.28742e+07							2.50039e+07	6.61116e+07	6.75072e+07	1	S(3): 100.0; T(6): 0.0	0	0.004052	236.57	High	18.16	0.472782	High	23.83	0.133101	High	20.98	0.318001				High	18.81		High	26.4		High	24.64		High	20.87		High
DVSYTDLAAR	7	1	1	LOC_Os02g54510.3	protein kinase domain containing protein, expressed	S3(Phospho)	1190.51	0	0	9.53093e+06							1.96286e+07		8.96417e+06	0.999879	S(3): 100.0; Y(4): 0.0; T(5): 0.0	0	0.001113	204.414																			High	12.64		High	16.3
DVVDDGKLSER	26	1	1	LOC_Os02g39920.1	AT hook motif family protein, expressed	S9(Phospho)	1312.58	0	1.59385e+09	9.05186e+08		5.07059e+08		1.60451e+09	1.49854e+09	1.67849e+09	9.39429e+08	8.53009e+08	9.2312e+08	1	S(9): 100.0	0	0.0003657	478.385	High	45.69	0.00222024	High	40.83	0.00680242	High	46.5	0.00184359	High	46.91	0.00162658	High	41.86	0.00537919	High	53.24	0.000391013	High	18.15		High	38.37	0.0134412	High
DVVLSDPAIQDER	6	1	1	LOC_Os03g13614.1	transcription factor, putative, expressed	S5(Phospho)	1536.7	0	3.48364e+07	1.55156e+07	9.3914e+06			4.1384e+07	4.62118e+07	1.69134e+07	2.36973e+07	2.28494e+07		1	S(5): 100.0	0	5.899e-05	339.472										High	43.47	0.00639812	High	59.94	0.000144432	High	48.34	0.00213823	High	46.18	0.00342689
DWSSDMPGDIDNDESVDK	9	1	1	LOC_Os03g11580.1	expressed protein	S3(Phospho)	2104.77	1.06697e+07	1.55709e+07	0	1.60879e+07		1.59211e+07		2.41953e+07	2.25173e+07				0.999998	S(3): 100.0; S(4): 0.0; S(15): 0.0	0	3.284e-06	339.829													High	49.5	0.00082244	High	45.81	0.0019616	High	35.57	0.020481				High
EAGSFISPSGTSVDGPSFR	19	1	1	LOC_Os01g69990.1	GYF domain containing protein, putative, expressed	T11(Phospho)	1977.87	1.48122e+08	0	1.55935e+08	140911320	1.5743e+08	1.46025e+08	7.92636e+07			1.84434e+08	1.57276e+08	1.26096e+08	0.984982	S(4): 0.0; S(7): 0.0; S(9): 0.0; T(11): 98.5; S(12): 1.5; S(17): 0.0	0	2.755e-05	320.346	High	24.96	0.518465	High	50.35	0.00144936	High	51.14	0.00121984	High	41.86	0.0108757				High	34.27		High	57.47	0.000293659	High	57.95	0.00026197	High
EALAQVTAQASHSPLR	25	1	1	LOC_Os12g32250.1	WRKY DNA-binding domain containing protein, expressed	S13(Phospho)	1758.86	9.01164e+07	0	2.29705e+07	8.96704e+07	9.14325e+07	8.92464e+07					3.60526e+07	3.2859e+07	1	T(7): 0.0; S(11): 0.0; S(13): 100.0	0	1.848e-08	562.592				High	8.05	23.1017	High	35.94	0.0374893										High	65.07	4.54155e-05	High	65.05	4.56095e-05	High
EALEEASEDGSLAK	4	1	1	LOC_Os03g55704.1	expressed protein	S7(Phospho)	1528.64	0	5.17265e+07	0				8.0476e+07	7.47034e+07					0.999997	S(7): 100.0; S(11): 0.0	0	1.431e-06	278.315										High	46.23	0.00244069	High	45.52	0.00296955
EANLSASNHNASK	15	1	1	LOC_Os03g11580.1	expressed protein	S5(Phospho)	1422.6	0	2.29168e+07	8.25858e+06			8.95773e+06	2.38091e+07	1.90193e+07	2.59218e+07		1.1984e+07	1.27917e+07	0.999999	S(5): 100.0; S(7): 0.0; S(12): 0.0	0	0.00014	292.882	High	21.04	0.637901	High	37.28	0.0150964	High	24.9	0.26114	High	49.15	0.000981462	High	45.43	0.00232285	High	50.14	0.000798829	High	30.84		High	31.22		High
EASSSLSPAK	6	1	1	LOC_Os09g34070.2	RNA recognition motif containing protein, expressed	S7(Phospho)	1056.46	7.94161e+07	0	1.43881e+08	1.26308e+08	1.11941e+08		1.1753e+08			1.42602e+08	1.35668e+08	1.53374e+08	1	S(3): 0.0; S(4): 0.0; S(5): 0.0; S(7): 100.0	0	0.0001498	232.772										High	48	0.00124256							High	53.96	0.000319424	High	41.52	0.00547194
EATPPVQDPVIEAVK	3	1	1	LOC_Os06g08480.1	CHD3-type chromatin-remodeling factor PICKLE, putative, expressed	T3(Phospho)	1672.82	0	2.25622e+07	0				3.59534e+07	3.17333e+07					1	T(3): 100.0	0	0.0006751	304.411										High	43.53	0.0056671	High	40.23	0.0120259	High	30.73
EATSSGGGGGGGAGVNDPR	7	1	1	LOC_Os03g54980.1	expressed protein	S5(Phospho)	1682.68	3.53639e+06	1.46191e+07	0	5.98324e+06		4.62594e+06	2.31834e+07	2.06741e+07			1.33787e+07		0.00606933	T(3): 49.7; S(4): 49.7; S(5): 0.6	0	3.067e-05	251.503										High	37.3	0.0254734	High	58.63	0.000186097				High	69.84	1.40222e-05				High
EDAKPAESEAAPPAPSEGGEK	31	2	1	LOC_Os12g42550.2	methyl-CpG binding domain containing protein, putative, expressed	S8(Phospho)	2146.92	3.07877e+08	0	0	3.18899e+08	3.22761e+08	2.81969e+08							1	S(8): 100.0; S(16): 0.0	0	1.715e-08	433.042	High	41.01	0.0107344	High	23.47	0.617098	High	40.46	0.0124311	High	24.49		High	17.33		High	34.01		High	46.65	0.00298671	High	38.97	0.0175316	High
EDASSHISGTDPVPSTP	46	1	1	LOC_Os06g20370.1	microtubule associated protein, putative, expressed	T16(Phospho)	1776.74	5.73757e+08	0	2.55324e+08	665096841	5.06226e+08	5.49949e+08	1.21773e+08			2.79696e+08	2.8064e+08	2.05635e+08	0.999832	S(4): 0.0; S(5): 0.0; S(8): 0.0; T(10): 0.0; S(15): 0.0; T(16): 100.0	0	7.426e-06	295.298	High	41.5	0.00708654	High	42.08	0.00623467	High	42.01	0.00632024	High	60.78	8.48973e-05	High	30.74		High	30.74		High	52.96	0.000513412	High	49.88	0.00104344	High
EDDVSDDEDR	10	1	1	LOC_Os02g08360.1	RNA recognition motif, putative, expressed	S5(Phospho)	1274.41	0	1.69198e+07	1.6625e+07				2.66554e+07		2.41038e+07	1.67578e+07	1.75778e+07	1.55392e+07	1	S(5): 100.0	0	0.001231	230.277	High	11.91	1.0661							High	30.39	0.0151286	High	20.56		High	30.13	0.016159	High	13.88					High
EDKSITAEQNQK	5	1	1	LOC_Os02g49320.1	sucrase-related, putative, expressed	S4(Phospho)	1470.65	0	5.89101e+06	0				8.51928e+06		9.15376e+06				1	S(4): 100.0; T(6): 0.0	0	0.001088	281.443										High	37.24	0.0197295				High	35.32	0.0282014	High	15.91		High	12.44
EEASASTPSEEQTEVIFSEVEDEKPK	13	1	1	LOC_Os08g42010.1	nodulin, putative, expressed	S18(Phospho)	2975.29	0	2.85839e+08	1.44098e+08				2.79043e+08	2.94667e+08	2.83808e+08	1.58411e+08	1.35992e+08	1.37892e+08	1	S(4): 0.0; S(6): 0.0; T(7): 0.0; S(9): 0.0; T(13): 0.0; S(18): 100.0	0	3.144e-08	367.013	High	37.12	0.0431071	High	36.66	0.0476106				High	45.89	0.00569496	High	41.28	0.0165554	High	45.13	0.00682244	High	20.11		High	15.16
EEEEEASPPR	18	1	1	LOC_Os09g33970.1	expressed protein	S7(Phospho)	1252.47	0	8.54546e+07	0				1.1908e+08		1.37284e+08				1	S(7): 100.0	0	0.001625	303.078	High	19.82	0.539399	High	7.96	7.49393	High	22.43	0.267738	High	41.52	0.00331558	High	23.46		High	41.06	0.00366253	High	29.58		High	21.99		High
EEELSGDELEEFIK	11	1	1	LOC_Os05g43060.1	retrotransposon, putative, centromere-specific, expressed	S5(Phospho)	1746.74	0	5.21428e+07	3.13029e+07				5.11446e+07	5.10332e+07	5.42507e+07	2.87624e+07	3.02013e+07	3.49452e+07	1	S(5): 100.0	0	9.77e-07	374.418	High	78.69	1.72862e-06	High	64.24	5.01769e-05	High	77.38	2.34362e-06	High	91.75	8.61829e-08	High	91.65	8.77459e-08	High	91.77	8.47891e-08
EEGGSPIRNPPTAAEDAR	74	1	1	LOC_Os06g11380.1	geminivirus Rep-interacting motor protein, putative, expressed	S5(Phospho)	1946.87	8.57297e+08	0	9.06284e+08	903266705	9.54158e+08	7.14465e+08	3.65295e+08			9.77013e+08	7.53494e+08	9.88345e+08	1	S(5): 100.0; T(12): 0.0	0	0.0007111	304.038	High	36.81	0.0312361	High	44.59	0.00520957	High	29.43	0.168187	High	36.26	0.0350511	High	30.14		High	23.16		High	47.43	0.00271076	High	43.52	0.00667614	High
EEGYGSDGNDDKR	6	2	1	LOC_Os08g04840.2	MYB family transcription factor, putative, expressed	S6(Phospho)	1521.55	5.63199e+06	1.02412e+07	0		8.71943e+06	8.17653e+06	1.62592e+07		1.44642e+07				0.999997	Y(4): 0.0; S(6): 100.0	0	5.313e-05	260.163										High	59.43	6.54503e-05	High	23.74		High	45.78	0.00132385				High	67.84	9.43047e-06	High
EEHSGGDEEGSQNDFR	6	1	1	LOC_Os02g58440.1	zinc finger C-x8-C-x5-C-x3-H type family protein, expressed	S4(Phospho)	1872.67	7.53344e+06	1.17084e+07	0	1.0676e+07	1.19243e+07		1.68805e+07	1.82447e+07					1	S(4): 100.0; S(11): 0.0	0	9.325e-08	366.948										High	50.96	0.000353941	High	42.43	0.00282882				High	60.84	3.824e-05	High	36.01	0.012305
EEPKPEPEAEAAAETTSR	165	1	1	LOC_Os01g13210.1	salt stress root protein RS1, putative, expressed	T15(Phospho)	2021.88	0	2.69256e+09	0			3.80047e+09	4.79345e+09	3.28425e+09				4.60563e+09	0.999926	T(15): 100.0; T(16): 0.0; S(17): 0.0	0	2.065e-06	512.574	High	33.41	0.0647572	High	32.72	0.0768971	High	30.15	0.136358	High	37.31	0.0266595	High	38.05	0.0225377	High	31.58		High	34.32		High	33.08		High
EESDNETLSVWK	15	1	1	LOC_Os06g17840.1	expressed protein	S3(Phospho)	1516.62	0	1.20378e+08	8.32388e+07				1.32139e+08	1.45124e+08	8.38723e+07	1.23606e+08	1.26111e+08		0.999933	S(3): 100.0; T(7): 0.0; S(9): 0.0	0	2.054e-05	237.41	High	31.3	0.0775411	High	19.08	1.29157	High	31.53	0.073682	High	52.73	0.000553868	High	74.99	3.2916e-06	High	82.97	5.30651e-07
EESNVKGDSEDDEPVMVVAK	28	1	1	LOC_Os04g50204.1	protein transport protein-related, putative, expressed	S9(Phospho)	2256.96	2.50922e+08	3.88119e+07	6.73383e+07	2.08209e+08	2.61611e+08	2.82946e+08	3.26856e+07	3.93546e+07	4.43955e+07	1.48466e+08	5.35492e+07		1	S(3): 0.0; S(9): 100.0	0	1.338e-08	610.817	High	41.92	0.00950214	High	54.56	0.000525093	High	56.39	0.000346948	High	57.25	0.000289423	High	45.45	0.00431644	High	36.58	0.0332866	High	60.07	0.000148684	High	67.16	2.86829e-05	High
EFDDVSEQYVAVTK	12	2	1	LOC_Os06g02130.1	G-protein alpha subunit, putative, expressed	S6(Phospho)	1709.73	1.47558e+07	1.08667e+08	5.78595e+07	2.21085e+07	9.51346e+06	1.26454e+07	1.28587e+08	1.14981e+08	8.2434e+07	6.75395e+07	5.3579e+07	5.246e+07	0.999999	S(6): 100.0; Y(9): 0.0; T(13): 0.0	0	2.219e-07	318.584				High	48.52	0.00202471	High	60.18	0.000136763	High	78.17	2.14968e-06	High	75.02	4.52017e-06	High	75.6	3.95783e-06	High	41.69	0.00975804	High	43.09	0.00655853	High
EFGLSFPGPVSPTSGR	15	1	1	LOC_Os07g45160.1	SAC3/GANP family protein, expressed	S11(Phospho)	1714.79	5.91297e+07	0	5.20674e+07		8.07644e+07	9.66248e+07		1.00137e+08		9.08779e+07	6.53245e+07		0.999999	S(5): 0.0; S(11): 100.0; T(13): 0.0; S(14): 0.0	0	3.816e-16	450.852	High	36.05	0.0403509	High	27.59	0.277992	High	34.98	0.0514495	High	32.32		High	36.1	0.0401222	High	25.72		High	32.5		High	46.41	0.00381695	High
EGDAEEEDGANEAGAEDKISK	2	1	1	LOC_Os05g28190.1	ranBP1 domain containing protein, expressed	S20(Phospho)	2243.89	1.53538e+07	0	0	2.24371e+07	2.36243e+07								1	S(20): 100.0	0	0.0002068	463.542																			High	53.11	0.000568791	High	42.91	0.00594063
EGDSDVDTSDESGTIEK	21	2	1	LOC_Os02g25060.2	NTMC2Type1.2 protein, putative, expressed	S4(Phospho)	1863.71	1.14453e+08	2.72121e+08	1.3997e+08	116382842	1.09978e+08	1.16998e+08	2.78204e+08	2.63252e+08	2.74908e+08	1.49064e+08	1.29014e+08	1.4183e+08	1	S(4): 100.0; T(8): 0.0; S(9): 0.0; S(12): 0.0; T(14): 0.0	0	1.921e-10	352.542	High	56.72	0.000159398	High	62.51	3.85159e-05	High	41.27	0.00514676	High	65.22	2.0757e-05	High	81.37	5.00773e-07	High	68.21	1.03591e-05	High	99.08	8.56512e-09	High	49.33	0.000808599	High
EGDSDVDTSDESGTIEK	2	2	1	LOC_Os02g25060.2	NTMC2Type1.2 protein, putative, expressed	S4(Phospho); T8(Phospho)	1943.67	0	9.36814e+06	0				9.84195e+06		1.82625e+07				0.984032	S(4): 100.0; T(8): 98.4; S(9): 1.6; S(12): 0.0; T(14): 0.0	0	2.029e-05	223.652										High	32.08	0.0262333				High	41.35	0.00308153
EGEDYGSDHGGDDIEDSLQSPLISR	22	2	1	LOC_Os10g39440.2	transporter family protein, putative, expressed	S7(Phospho)	2771.14	7.07404e+07	0	0	1.12553e+08	9.96679e+07								0.5	Y(5): 50.0; S(7): 50.0; S(17): 0.0; S(20): 0.0; S(24): 0.0	0	3.739e-07	302.897	High	20.38	1.44717	High	24.7	0.511824	High	24.42	0.568136	High	17.13					High	8.19		High	44.36	0.00579338	High	39.11	0.019461	High
EGGASISHIDEQDGHQETNAQTSLDNSEGLPSPSGR	67	1	1	LOC_Os07g37750.1	ATMIN7, putative, expressed	S32(Phospho)	3800.64	2.50896e+08	5.35148e+07	2.48145e+08	358942160	1.28926e+08	2.64821e+08	9.98674e+07		6.0677e+07	2.0984e+08	2.22206e+08	3.12388e+08	0.5	S(5): 0.0; S(7): 0.0; T(18): 0.0; T(22): 0.0; S(23): 0.0; S(27): 0.0; S(32): 50.0; S(34): 50.0	0	6.696e-11	372.528	High	48.61	0.0033597	High	39.03	0.0298812	High	44.65	0.00843037	High	38.5	0.0343317	High	44.2	0.00935076	High	38.66	0.0330899	High	53.79	0.000997152	High	51.83	0.00157409	High
EGSFSWALPR	16	2	1	LOC_Os10g03830.2	expressed protein	S3(Phospho)	1229.54	6.35682e+07	1.31755e+08	8.88372e+07	6.50408e+07	5.45346e+07	7.11294e+07	1.10885e+08	1.51777e+08	1.32602e+08	1.03069e+08	8.20735e+07	8.13688e+07	0.999999	S(3): 100.0; S(5): 0.0	0	8.007e-05	221.68	High	54.73	0.000309422	High	56.8	0.000192111	High	55.05	0.000289319	High	35.16	0.0242917	High	34.34	0.0292294	High	43.27	0.00437538	High	64.13	3.5623e-05	High	64.6	3.09116e-05	High
EGSHNYDIESTDGSGGLWR	33	1	1	LOC_Os02g35190.2	chloride channel protein, putative, expressed	S3(Phospho)	2159.87	4.40472e+07	7.49384e+07	0	5.28097e+07	4.6758e+07	3.25738e+07	1.00739e+08	4.40513e+07	8.00254e+07		4.17207e+07		1	S(3): 100.0; Y(6): 0.0; S(10): 0.0; T(11): 0.0; S(14): 0.0	0	3.174e-08	322.106	High	31.57	0.0909098				High	44.24	0.00503653	High	50.89	0.00111696	High	47.83	0.00225633	High	56.97	0.00026289	High	54.33	0.000484099	High	47.05	0.00251878	High
EHASDGTSSVLEPEVELSHDGK	43	4	1	LOC_Os03g61930.4	ACBP4, putative, expressed	S18(Phospho)	2403.04	2.16263e+07	0	0	2.13209e+07	4.35581e+07								1	S(4): 0.0; T(7): 0.0; S(8): 0.0; S(9): 0.0; S(18): 100.0	0	0.0006825	307.146	High	31.81	0.105534	High	7.04	31.6513	High	3.44	72.5315	High	23.32		High	20.61		High	21.38		High	40.67	0.013764	High	42.62	0.00876046	High
EHEHSGSLDDTDR	15	1	1	LOC_Os03g12350.2	two-component response regulator, putative, expressed	S5(Phospho); S7(Phospho)	1657.55	0	3.67938e+07	0		1.61977e+07		3.76625e+07	3.99222e+07	3.27966e+07		1.95501e+07		1	S(5): 100.0; S(7): 100.0; T(11): 0.0	0	0.000134	384.402	High	16.25	0.844209	High	19.75	0.36915	High	14.66	1.21745	High	45.77	0.000926975	High	33	0.0178172	High	34.48	0.0126718	High	15.54		High	34.37	0.0128141	High
EIAAPHGSIMGAVGR	15	2	1	LOC_Os10g39440.2	transporter family protein, putative, expressed	S8(Phospho)	1545.73	2.63375e+07	0	2.77347e+07		4.89128e+07	3.00998e+07		9.83431e+07			2.1481e+07	6.1723e+07	1	S(8): 100.0	0	1.648e-06	432.549				High	24.1	0.485723	High	39.95	0.0126801	High	30.44		High	47.44	0.00225738	High	22.52		High	20.66		High	35.12	0.037836	High
EIDADDSDVEPR	15	1	1	LOC_Os06g01700.1	CWC15 homolog A, putative, expressed	S7(Phospho)	1440.56	2.56244e+07	9.25252e+07	4.36069e+07	2.72685e+07	2.28806e+07	2.6724e+07	9.50618e+07	8.80163e+07	9.44974e+07	4.58637e+07	4.04312e+07	4.45259e+07	1	S(7): 100.0	0	0.0001326	329.335	High	36.75	0.0161788							High	49.96	0.000772078	High	37.31	0.0142586	High	38.36	0.0112256	High	38.92	0.00992524	High	46.6	0.00167911	High
EIDPLTQSPTITGVSHEHEGR	47	1	1	LOC_Os08g10310.1	SHR5-receptor-like kinase, putative, expressed	S8(Phospho)	2383.1	0	4.11526e+08	4.74698e+08			2.54378e+08	2.94548e+08	5.57306e+08	3.82725e+08	5.55735e+08	3.87865e+08	4.80495e+08	0.999771	T(6): 0.0; S(8): 100.0; T(10): 0.0; T(12): 0.0; S(15): 0.0	0	4.785e-08	389.069	High	44.69	0.00674496	High	43.25	0.00939678	High	37.31	0.036961	High	55.36	0.000579524	High	40.01	0.0194402	High	41.42	0.0140724	High	31.03		High	35.66		High
EIDTDPEDADNLNTK	10	1	1	LOC_Os06g43610.1	formamidopyrimidine-DNA glycosylase, putative, expressed	T4(Phospho)	1769.71	3.92851e+07	8.0163e+07	4.56107e+07	4.18234e+07	3.72564e+07	3.87754e+07	7.92749e+07	7.8906e+07	8.23081e+07	4.76556e+07	4.71501e+07	4.20265e+07	1	T(4): 100.0; T(14): 0.0	0	3.195e-06	337.596										High	39.35	0.0108595	High	56.74	0.000192029	High	48.08	0.00145405	High	41.31	0.00695599	High	57.33	0.000177992	High
EIMKQEDDSDEEDNR	14	1	1	LOC_Os08g32100.1	transposon protein, putative, CACTA, En/Spm sub-class, expressed	S9(Phospho)	1932.72	1.23001e+07	2.16856e+07	3.3515e+07	19386231		1.75141e+07	2.27387e+07	1.97828e+07	2.25353e+07	3.6154e+07	3.22106e+07	3.21804e+07	1	S(9): 100.0	0	1.251e-06	437.67	High	34.28	0.0332193	High	49.38	0.00103234	High	45.74	0.0023375	High	41.96	0.00569932	High	43.72	0.00380247	High	40	0.009245	High	55.45	0.000253741				High
EIQELWDTIAGGDSEDDQEGVR	31	1	1	LOC_Os01g05420.1	IWS1 C-terminus family protein, putative, expressed	S14(Phospho)	2542.06	5.89224e+07	3.0385e+08	1.47343e+08	5.92689e+07	5.96332e+07	5.7865e+07	2.97693e+08	3.15032e+08	2.98823e+08	1.59507e+08	1.30172e+08	1.52351e+08	1	T(8): 0.0; S(14): 100.0	0	1.422e-11	548.624	High	88.57	2.3108e-07	High	85.22	4.90291e-07	High	87.23	3.56328e-07	High	90.96	1.33119e-07	High	88.49	2.64541e-07	High	83.07	8.04366e-07	High	89.95	2.03327e-07	High	73.76	7.94332e-06	High
EISDDEDDDIDDSK	13	1	1	LOC_Os04g01740.1	heat shock protein, putative, expressed	S3(Phospho)	1690.59	5.93397e+07	0	2.9203e+07	5.55215e+07	6.02022e+07	6.22955e+07				3.17287e+07	2.64267e+07	2.94537e+07	1	S(3): 100.0; S(13): 0.0	0	7.584e-07	271.252	High	50.89	0.000334029	High	46.67	0.000954759	High	41.71	0.00290722										High	53.04	0.000218997	High	59.17	5.369e-05	High
EIVTSPGPER	15	2	1	LOC_Os01g72790.1	cyclin-dependent kinase, putative, expressed	S5(Phospho)	1164.53	1.21871e+08	0	0		1.81055e+08	1.84558e+08					1.6789e+08		1	T(4): 0.0; S(5): 100.0	0	0.0003682	333.142	High	44.48	0.00251476	High	43.72	0.00299357	High	33.43	0.0321618	High	31.34		High	27.35					High	29.07		High	37.34	0.0138653	High
EKDGAVQVSPK	23	1	1	LOC_Os02g15660.1	tetratricopeptide repeat, putative, expressed	S9(Phospho)	1237.59	0	1.54085e+08	0				1.49795e+08	1.53062e+08	1.59399e+08			1.81954e+08	1	S(9): 100.0	0	0.0002957	342.125	High	22.38	0.691114	High	37.47	0.0210396	High	27.79	0.200358	High	34.67	0.0408408	High	35.42	0.0336886	High	38.05	0.0187853	High	31.55		High	20.73		High
EKEALGEGSDAAQD	20	1	1	LOC_Os06g51420.1	coiled-coil domain-containing protein 12, putative, expressed	S9(Phospho)	1499.59	1.10591e+08	0	0		1.59158e+08	1.72613e+08					2.04437e+08		1	S(9): 100.0	0	0.001454	347.378	High	24.11	0.272676	High	41.85	0.00464702	High	18.49	1.00309	High	26.86		High	9.2		High	16.71		High	31.29		High	37.02	0.0141013	High
EKGDSDEEDDDYDK	3	1	1	LOC_Os02g39890.1	RNA recognition motif containing protein, putative, expressed	S5(Phospho)	1739.59	5.85254e+06	0	0	8.42529e+06	9.13234e+06								1	S(5): 100.0; Y(12): 0.0	0	9.236e-06	333.863																			High	32.45	0.015615	High	49.13	0.000435572
EKSDEEDGPPDPNAVPTDFTSR	24	1	1	LOC_Os01g14920.1	zinc knuckle family protein, putative, expressed	S3(Phospho)	2483.02	3.10144e+08	0	0	3.30288e+08	2.51875e+08	3.48269e+08							1	S(3): 100.0; T(17): 0.0; T(20): 0.0; S(21): 0.0	0	1.499e-07	385.397	High	15.17	4.64495	High	20.9	1.17291	High	9.79	15.1344	High	12.94		High	13.87		High	14.06		High	53.23	0.000717281	High	58.34	0.000208987	High
ELDYLVGAVSSPK	12	2	1	LOC_Os05g41640.1	phosphoglycerate kinase protein, putative, expressed	S11(Phospho)	1457.69	0	0	6.71863e+07					2.10667e+07		7.54258e+07	6.52368e+07	6.08963e+07	0.986459	Y(4): 0.0; S(10): 1.4; S(11): 98.6	0	2.562e-07	244.48	High	42.57	0.00688644	High	29.58	0.139179	High	47	0.00250206				High	38.89	0.0163275	High	25.65
ELEGSSGAGDDPSGADDTHSPTTTAAAHHQHR	63	3	1	LOC_Os03g52239.1	homeobox domain containing protein, expressed	S20(Phospho)	3292.36	4.19783e+08	0	3.40519e+08	7.14527e+08	5.44821e+08			3.6166e+08		5.8464e+08	4.36918e+08		0.999495	S(5): 0.0; S(6): 0.0; S(13): 0.0; T(18): 0.0; S(20): 99.9; T(22): 0.0; T(23): 0.0; T(24): 0.0	0	3.452e-11	476.361	High	17.13	3.79926	High	9.89	19.4925	High	11.92	12.4007	High	9.16		High	41.14	0.0148135	High	12.59		High	41.51	0.0134094	High	54.95	0.000624104	High
ELGEGSASVSPVSGLSSSR	19	1	1	LOC_Os05g05950.1	TOC159, putative, expressed	S6(Phospho); S8(Phospho)	1965.83	5.68602e+07	0	4.49337e+07	56358975	5.06329e+07	6.35887e+07		7.31291e+07		5.09166e+07	5.30493e+07	3.08351e+07	0.000320792	S(6): 100.0; S(8): 0.0; S(10): 98.2; S(13): 1.7; S(16): 0.0; S(17): 0.0; S(18): 0.0	0	3.816e-16	334.975	High	54.78	0.000419816	High	37.55	0.0219301	High	35.87	0.0323915	High	32.59		High	44.31	0.00477807	High	33.11		High	37.66	0.0221015	High	38.14	0.019927	High
ELPSVSPR	14	2	1	LOC_Os07g37560.2	myosin-Vb, putative, expressed	S6(Phospho)	964.456	5.15806e+07	0	0	74901935	7.98398e+07								0.999999	S(4): 0.0; S(6): 100.0	0.001	0.03538	219.027	High	20.99	0.474511							High	20.43		High	23.72					High	38.07	0.0087101	High	38.58	0.00829973	High
ELSDLELGEFR	11	1	1	LOC_Os03g08820.1	expressed protein	S3(Phospho)	1387.62	0	7.61844e+07	4.15115e+07				8.26384e+07	7.48174e+07	7.10974e+07	3.98557e+07	3.61448e+07	4.85339e+07	1	S(3): 100.0	0	3.816e-16	293.546	High	29.24	0.143962	High	59.7	0.000119421	High	59.65	0.000121075	High	59.7	0.0001281	High	60.08	0.000112606	High	60.06	0.00011791
ELSDTDSSSECR	6	2	1	LOC_Os02g53700.6	DENN domain containing protein, expressed	S3(Phospho); C11(Carbamidomethyl)	1465.52	0	1.02286e+07	0	7.30076e+06				1.31066e+07	1.75793e+07				1	S(3): 100.0; T(5): 0.0; S(7): 0.0; S(8): 0.0; S(9): 0.0	0	1.084e-05	260.948							High	42.37	0.0019266				High	58.68	4.51956e-05	High	47.73	0.000568368	High	60.21	3.17758e-05
ELSEIAEQAK	8	3	1	LOC_Os04g56160.1	plasma membrane ATPase, putative, expressed	S3(Phospho)	1197.55	0	2.90729e+07	0				4.03925e+07		4.68264e+07			3.87056e+07	1	S(3): 100.0	0	0.0007931	205.519	High	41.07	0.00879722	High	20.78	0.928773	High	34.37	0.039667	High	39.31	0.0128121	High	19.07		High	44.84	0.00370256
ELSHVNSPCDSTEEAGNLK	22	2	1	LOC_Os08g37280.2	PWWP domain containing protein, expressed	C9(Carbamidomethyl); S11(Phospho)	2166.91	0	1.00461e+08	8.63674e+07	2.17795e+07			1.30653e+08	1.32177e+08	3.85546e+07	1.33796e+08		1.25307e+08	0.999853	S(3): 0.0; S(7): 0.0; S(11): 100.0; T(12): 0.0	0	3.627e-06	344.693	High	30.32	0.127454	High	31.11	0.118802	High	36.26	0.0317625	High	37.26	0.0302852	High	42.98	0.00690803	High	36.43	0.0306569	High	38.81	0.0202676				High
ELSPETDDGDNK	30	1	1	LOC_Os04g42320.1	AT hook motif family protein, expressed	S3(Phospho)	1399.53	6.72537e+07	1.43539e+08	8.07804e+07	4.96579e+07	7.57324e+07	7.63709e+07	1.3405e+08	1.49282e+08	1.47286e+08	7.14165e+07	6.70494e+07	1.03875e+08	1	S(3): 100.0; T(6): 0.0	0	2.094e-05	260.805	High	31.21	0.0382957	High	31.61	0.0351677	High	27.8	0.0861326	High	44.32	0.0018251	High	40.82	0.00418939	High	43.47	0.00226239	High	43.13	0.00240528	High	38.66	0.00686168	High
EMNETDVPISYSGAGNPEK	27	1	1	LOC_Os03g15740.1	uncharacterized TPR repeat-containing protein, putative, expressed	S12(Phospho)	2117.88	0	1.47819e+08	1.16952e+08				1.72115e+08	1.84846e+08	8.64974e+07	1.1871e+08	1.23169e+08	1.08978e+08	0.999999	T(5): 0.0; S(10): 0.0; Y(11): 0.0; S(12): 100.0	0	0.0003758	404.294	High	45.87	0.00442843	High	39.95	0.0172677	High	37.25	0.0331899	High	51.65	0.00116846	High	53.59	0.0007521	High	46.52	0.00391425	High	33.15		High	30.08		High
EMPQAEQSPHR	12	1	1	LOC_Os04g52060.1	transposable element protein, putative, containing Pfam profile: PF03004, Transposase_24, expressed	S8(Phospho)	1389.57	1.67176e+07	0	0	2.32162e+07	2.69367e+07								1	S(8): 100.0	0	0.0005911	275.921										High	31.9		High	20.11		High	19.21		High	35.81	0.0251007	High	32.66	0.0477232	High
EMSDDESTDK	10	1	1	LOC_Os04g58620.1	potasium efflux antiporter protein, putative, expressed	S3(Phospho)	1236.4	0	7.14811e+07	4.61183e+07				1.19619e+08		9.48243e+07		7.29848e+07	6.53703e+07	1	S(3): 100.0; S(7): 0.0; T(8): 0.0	0	5.526e-09	218.509	High	18.18	0.246329	High	37.8	0.00263045				High	38.14	0.00253979				High	40.29	0.00148262							High
ENSGFTFLH	15	1	1	LOC_Os03g48140.1	myosin, putative, expressed	S3(Phospho)	1131.45	3.38828e+07	0	4.53953e+07	3.41577e+07	3.14524e+07	3.60383e+07		4.26307e+07		4.95534e+07	4.58727e+07	4.07599e+07	0.999998	S(3): 100.0; T(6): 0.0	0	0.001276	202.639	High	46.1	0.00121263	High	49.95	0.00049972	High	49.82	0.000514905	High	27.52		High	44.76	0.00175285	High	28.36		High	46.48	0.00112115	High	50.11	0.00048652	High
ENSVDVDTSR	13	1	1	LOC_Os03g51220.1	SWI/SNF-related matrix-associated actin-dependent regulator of chromatin subfamily C member, putative, expressed	S3(Phospho)	1201.47	5.3651e+07	0	5.13248e+07	7.78478e+07	8.31052e+07				1.08877e+08		7.54433e+07	7.85312e+07	1	S(3): 100.0; T(8): 0.0; S(9): 0.0	0	3.861e-05	256.352	High	31.67	0.0303964	High	30.86	0.0382284	High	32.16	0.0278222	High	22.28					High	33.3	0.0212352	High	39.43	0.00527936	High	43.7	0.00198786	High
EPSVAVR	14	2	1	LOC_Os07g27950.2	RING zinc finger protein, putative, expressed	S3(Phospho)	837.39	0	1.04412e+07	0					2.29139e+07	8.40962e+06	2.54437e+07			1	S(3): 100.0	0.003	0.0381	146.566										High	41.37	0.00344669	High	31.41	0.0342232	High	39.79	0.00484364
EQMTPLSDFEDKL	15	2	1	LOC_Os02g32030.1	elongation factor, putative, expressed	S7(Phospho)	1632.69	0	0	1.00517e+08		8.32051e+07					1.52737e+08		1.48813e+08	1	T(4): 0.0; S(7): 100.0	0	0.001084	313.554	High	31.08	0.0842217	High	33.8	0.0447301	High	27.45	0.192929	High	18.57		High	22.5		High	27		High	27.58		High	35.19	0.0341436	High
EQSPGPAAR	16	1	1	LOC_Os07g39560.3	RNA recognition motif containing protein, putative, expressed	S3(Phospho)	992.421	3.31203e+07	4.8061e+07	0	1.99852e+07	3.8712e+07	4.06636e+07	5.11443e+07	4.69965e+07	4.60421e+07	4.54677e+07			1	S(3): 100.0	0	0.004731	215.544	High	17.14	1.31374	High	30.35	0.0626426	High	29.56	0.077353	High	50.08	0.000684278	High	43.09	0.00341917	High	35.94	0.0179934	High	34.99	0.0221553	High	34.71	0.0236307	High
ERGSPDYGR	36	4	1	LOC_Os02g03040.4	RNA recognition motif containing protein, expressed	S4(Phospho)	1116.45	9.89485e+08	4.68355e+09	3.36764e+09	881637880	1.00069e+09	1.08613e+09	4.93399e+09	4.16688e+09	4.94978e+09	3.04804e+09	3.64025e+09	3.41464e+09	1	S(4): 100.0; Y(7): 0.0	0	0.009745	221.128	High	35.56	0.0115636	High	33.86	0.0176589	High	45.17	0.00126501	High	35.55	0.0115345	High	46.19	0.00102306	High	47.6	0.000722925	High	41.71	0.00287012	High	37.81	0.00702046	High
ESDYDSDDDPSVPAR	11	1	1	LOC_Os04g58330.1	expressed protein	S6(Phospho)	1747.64	1.57353e+07	7.30057e+07	4.19284e+07	2.36942e+07		2.35118e+07	7.31299e+07	6.9207e+07	7.66802e+07	4.32597e+07	3.72538e+07	4.52717e+07	1	S(2): 0.0; Y(4): 0.0; S(6): 100.0; S(11): 0.0	0	2.642e-07	294.963	High	20.53	0.358472				High	29.15	0.0490731	High	64.82	1.32998e-05	High	69.32	4.64876e-06	High	71.31	2.9954e-06	High	39.46	0.00475042				High
ESIDILSPNDENTASQK	18	2	1	LOC_Os01g73620.2	expressed protein	S7(Phospho)	1940.85	0	1.02451e+07	1.85467e+07	1.29969e+07				1.41697e+07	1.65655e+07	3.35287e+07	1.27908e+07	9.32061e+06	0.999998	S(2): 0.0; S(7): 100.0; T(13): 0.0; S(15): 0.0	0	2.46e-07	328.026	High	47.41	0.00274506	High	21.91	0.979781	High	34.99	0.0488272	High	40.43	0.0135679	High	45.9	0.00396998	High	37.5	0.0266208	High	61.41	0.000107187	High	29.07		High
ESQVSDFEDLEEDK	7	1	1	LOC_Os05g05480.1	OsDegp6 - Putative Deg protease homologue, expressed	S5(Phospho)	1749.68	0	2.89035e+07	0				2.80545e+07	2.91393e+07	2.95169e+07	2.36555e+07			1	S(2): 0.0; S(5): 100.0	0	1.392e-05	238.631	High	50.89	0.000673353	High	56.5	0.000184918	High	17.18	1.58022	High	44.05	0.00325269	High	50.56	0.000741455	High	65.5	2.38576e-05
ESQVSDFEDLEEDKFLNAVVK	12	1	1	LOC_Os05g05480.1	OsDegp6 - Putative Deg protease homologue, expressed	S5(Phospho)	2521.14	0	0	3.56514e+07								4.75535e+07	5.94006e+07	0.0136644	S(2): 98.6; S(5): 1.4	0	1.225e-08	297.45	High	35.4	0.0644004	High	42.18	0.0133387	High	32.67	0.118723	High	17.73		High	11.8
ESSHSSVTSSTAPER	47	1	1	LOC_Os07g06740.2	CAMK_CAMK_like.31 - CAMK includes calcium/calmodulin depedent protein kinases, expressed	S5(Phospho)	1641.68	1.71851e+08	0	0	1.82236e+08	1.6774e+08	1.65578e+08				5.6517e+08			0.999897	S(2): 0.0; S(3): 0.0; S(5): 100.0; S(6): 0.0; T(8): 0.0; S(9): 0.0; S(10): 0.0; T(11): 0.0	0	4.234e-06	315.062	High	9.72	10.058	High	7.57	16.8773	High	18.52	1.30622	High	23.81		High	24.63		High	24.44		High	43.91	0.00385715	High	45.89	0.00249646	High
ESVASPSSTVESK	12	2	1	LOC_Os04g46190.2	ubiquitin carboxyl-terminal hydrolase, family 1, putative, expressed	S5(Phospho)	1387.6	1.07165e+08	0	1.1325e+08	116022664	1.13943e+08	9.15297e+07				1.22666e+08	1.08955e+08	1.08129e+08	0.999998	S(2): 0.0; S(5): 100.0; S(7): 0.0; S(8): 0.0; T(9): 0.0; S(12): 0.0	0	3.609e-05	303.87				High	27.02	0.214995				High	28.25					High	26.97		High	43.69	0.00478657	High	39.98	0.0111563	High
ESWESAAGSR	6	1	1	LOC_Os07g38170.1	remorin, putative, expressed	S9(Phospho)	1159.44	8.28109e+07	3.92081e+07	0	8.50299e+07	7.97027e+07	8.37001e+07	5.60122e+07	6.16122e+07		1.14472e+08			0.999862	S(2): 0.0; S(5): 0.0; S(9): 100.0	0	0.001819	200.299										High	50.89	0.000481083	High	51.39	0.000428766				High	32.07	0.0370969	High	48.11	0.000895475	High
ETRPADAGGVVVSEEK	15	3	1	LOC_Os05g51850.3	AT hook-containing DNA-binding protein, putative, expressed	S13(Phospho)	1723.8	3.26755e+07	0	0		4.84907e+07	4.95357e+07							1	T(2): 0.0; S(13): 100.0	0	0.0002352	342.505	High	33.26	0.0819974	High	37.7	0.0290654	High	38.95	0.021605	High	29.93		High	29.04		High	28.84		High	34.87		High	35.64	0.0470749	High
ETSPCALPIDQR	29	2	1	LOC_Os02g41550.1	FAD binding domain of DNA photolyase domain containing protein, expressed	S3(Phospho); C5(Carbamidomethyl)	1466.63	3.69144e+07	1.33895e+08	1.19824e+08	3.66529e+07	3.54256e+07	3.86647e+07	1.14459e+08	1.46775e+08	1.40452e+08	1.2393e+08	1.10986e+08	1.24556e+08	0.999883	T(2): 0.0; S(3): 100.0	0	0.002621	220.685	High	59.07	0.000133852	High	59.46	0.000130283	High	59.06	0.000132608	High	54.89	0.000367801	High	54.64	0.000367435	High	71.45	8.22133e-06	High	54.51	0.000398955	High	39.26	0.0134525	High
EVAGAAADLLHSASTYGK	41	1	1	LOC_Os10g18340.1	expressed protein	S14(Phospho)	1840.85	1.28456e+09	5.33879e+08	7.66218e+08	1.26513e+09	1.26208e+09	1.32647e+09	5.45187e+08	5.20582e+08	5.35867e+08	7.88598e+08	7.43068e+08	7.66986e+08	0.999917	S(12): 0.0; S(14): 100.0; T(15): 0.0; Y(16): 0.0	0	1.599e-12	763.295	High	114.19	5.32921e-10	High	114.64	4.82699e-10	High	99.95	1.42228e-08	High	106.13	3.4556e-09	High	101.42	1.00847e-08	High	110.82	1.16616e-09	High	99.28	1.66012e-08	High	100.23	1.31688e-08	High
EVANECPLKSFK	3	5	1	LOC_Os12g26290.5	alpha-DOX2, putative, expressed	C6(Carbamidomethyl); S10(Phospho)	1501.68	0	4.6841e+07	0				7.85534e+07		6.19696e+07				1	S(10): 100.0	0	1.266e-05	447.526										High	49.26	0.00116976	High	30.09		High	33.7	0.0435324
EVLLQSSPTK	28	1	1	LOC_Os01g56100.1	BSD domain containing protein, expressed	S7(Phospho)	1181.58	0	0	5.98031e+07							9.76387e+07		8.17706e+07	0.989474	S(6): 0.0; S(7): 98.9; T(9): 1.0	0	0.006374	246.072	High	26.34	0.318679	High	40.62	0.0118991	High	26.86	0.2855	High	24.3		High	19.78		High	26.94		High	29.74		High	32.93		High
EVNAGIASVSR	11	2	1	LOC_Os11g36430.2	zinc finger, C3HC4 type domain containing protein, expressed	S10(Phospho)	1182.56	2.51575e+07	0	1.88392e+07	2.50224e+07	2.3688e+07	2.67623e+07				2.1484e+07	1.71148e+07	1.79188e+07	0.999999	S(8): 0.0; S(10): 100.0	0	0.001086	251.83							High	24.39	0.409768										High	43.51	0.00506934	High	35.26	0.0337764	High
EVPAPVSPVKETPILR	28	1	1	LOC_Os01g71050.1	MSP domain containing protein, putative, expressed	S7(Phospho)	1811.97	0	0	6.88996e+07		8.13938e+07				1.17689e+08		9.263e+07	1.14069e+08	1	S(7): 100.0; T(12): 0.0	0	0.001296	456.673	High	28.92	0.0839285	High	35	0.0206022	High	18.56	0.932022	High	31.23		High	21.15		High	34.41	0.0240167	High	23.18		High	36.43	0.014572	High
EVQMEGMPLHSQFTLDSDEEKEDER	8	1	1	LOC_Os06g13160.1	viral-response family protein, expressed	S17(Phospho)	3059.27	4.40196e+07	0	0	6.74872e+07		6.45715e+07							1	S(11): 0.0; T(14): 0.0; S(17): 100.0	0	5.926e-08	485.906				High	17.62	3.15778	High	13.84	7.64757										High	40.86	0.0149017				High
EYLSLVR	11	2	1	LOC_Os04g08740.3	ethylene receptor, putative, expressed	S4(Phospho)	959.461	0	2.91276e+07	0				2.85976e+07	2.65603e+07	3.22248e+07		1.63231e+07		1	Y(2): 0.0; S(4): 100.0	0.001	0.03025	157.718	High	21.98	0.457654	High	33.85	0.0297534	High	33.37	0.0332305	High	39.03	0.00902687	High	31.95	0.0459869	High	31.72	0.049733	High	27.16					High
FADETGSPPR	19	1	1	LOC_Os05g02140.1	clathrin assembly protein, putative, expressed	S7(Phospho)	1156.47	5.26619e+07	0	0	79655323	7.83305e+07		7.41194e+07						0.999999	T(5): 0.0; S(7): 100.0	0	0.0065	271.523	High	23.54	0.20868	High	21.65	0.302973	High	23.37	0.206195	High	30.72	0.0393961	High	27.93		High	21.96		High	31.57	0.0323931	High	32.95	0.0239046	High
FAESVSAPLSAPSGVAAAR	6	2	1	LOC_Os11g33120.2	respiratory burst oxidase, putative, expressed	S6(Phospho)	1867.91	6.57449e+07	0	0	6.29998e+07	6.20593e+07	7.21756e+07							0.999896	S(4): 0.0; S(6): 100.0; S(10): 0.0; S(13): 0.0	0	7.37e-06	361.104																			High	79.54	1.93942e-06	High	79.02	2.20741e-06	High
FASPEDCK	7	1	1	LOC_Os10g38900.1	erythronate-4-phosphate dehydrogenase, putative, expressed	S3(Phospho); C7(Carbamidomethyl)	1033.37	7.5297e+07	0	1.03129e+08	1.11397e+08	1.14494e+08			1.60478e+08		1.76474e+08	1.32913e+08		1	S(3): 100.0	0	3.883e-05	330.725													High	47.84	0.000305031				High	51.74	0.000125938	High	48.92	0.000239796
FASPEDSK	14	1	1	LOC_Os03g03460.1	erythronate-4-phosphate dehydrogenase, putative, expressed	S3(Phospho)	960.374	0	1.61745e+08	0				2.64733e+08	2.20502e+08					1	S(3): 100.0; S(7): 0.0	0	0.007284	332.129	High	18.01	0.464096	High	22.98	0.147777				High	31.05	0.0232037	High	31.85	0.019398	High	25.13		High	26.13		High	25.3		High
FDADGDGRISPSELAAVTR	58	1	1	LOC_Os01g04330.1	OsCML16 - Calmodulin-related calcium sensor protein, expressed	S10(Phospho)	2056.95	7.12121e+08	0	1.02462e+09	8.16019e+08	6.79483e+08	6.4086e+08				1.09096e+09	1.04022e+09	9.42687e+08	0.999998	S(10): 100.0; S(12): 0.0; T(18): 0.0	0	4.838e-05	430.274	High	44.63	0.00642213	High	53.96	0.000732063	High	56.78	0.000390298	High	31.77		High	11.36		High	24.93		High	59.14	0.000229658	High	71.14	1.45096e-05	High
FDEMSETSSSHGGHTSAGSAPVPELPR	148	1	1	LOC_Os01g16870.1	argonaute, putative, expressed	T7(Phospho)	2850.21	1.36881e+08	0	1.26055e+08	2.04923e+08	6.3282e+07	1.42437e+08				1.28744e+08	1.32118e+08	1.17304e+08	0.927151	S(5): 1.8; T(7): 92.7; S(8): 1.8; S(9): 1.8; S(10): 1.8; T(15): 0.0; S(16): 0.0; S(19): 0.0	0	3.986e-09	346.31	High	48.59	0.00309919	High	43.91	0.00906775	High	62.12	0.00013693	High	29.74		High	34.86		High	24.94		High	53.77	0.000936063	High	44.65	0.00766772	High
FDHPMGTLMYGSATSPR	62	1	1	LOC_Os12g21700.1	zinc finger C-x8-C-x5-C-x3-H type family protein, expressed	S15(Phospho)	1947.82	5.68502e+08	0	0	7.03782e+08	3.96035e+08	6.05688e+08							0.999929	T(7): 0.0; Y(10): 0.0; S(12): 0.0; T(14): 0.0; S(15): 100.0	0	2.337e-10	541.397	High	26.65	0.34398	High	3.81	66.1714	High	22.38	0.920907										High	56.21	0.000392743	High	44.85	0.00519653	High
FDHPMGTVMYGLATSPTGDVSAR	24	2	1	LOC_Os11g28270.2	zinc finger C-x8-C-x5-C-x3-H type family protein, expressed	S15(Phospho)	2490.08	1.08095e+09	0	3.49289e+08	1.0945e+09	1.04424e+09	1.10411e+09				5.43584e+08		5.04284e+08	0.991715	T(7): 0.0; Y(10): 0.0; T(14): 0.8; S(15): 99.2; T(17): 0.0; S(21): 0.0	0	2.131e-14	534.771	High	25.28	0.587778	High	28.34	0.291497	High	34.36	0.0730127	High	7.13								High	73.2	9.49363e-06	High	74.03	7.84605e-06	High
FDPDGSDDDGAAASAAAGR	7	1	1	LOC_Os12g29660.1	DEAD-box ATP-dependent RNA helicase, putative, expressed	S6(Phospho)	1845.69	1.31441e+07	1.58083e+07	3.59439e+07	1.90692e+07		2.03631e+07	2.53257e+07	2.20993e+07		3.75808e+07	3.40652e+07	3.61857e+07	1	S(6): 100.0; S(14): 0.0	0	3.816e-16	421.477										High	82.6	3.93471e-07	High	104.26	2.55732e-09				High	84	2.81064e-07				High
FDWDHPMHLQPTSPTAFK	99	2	1	LOC_Os03g55070.2	UDP-glucose 6-dehydrogenase, putative, expressed	M7(Oxidation); S13(Phospho)	2250.98	3.78941e+09	0	0	4.03618e+09	3.76627e+09	3.56578e+09				1.60232e+09			0.986252	T(12): 1.4; S(13): 98.6; T(15): 0.0	0	1.44e-05	328.208	High	30.81	0.133855	High	31.27	0.120141	High	30.61	0.139468	High	30.41		High	30.88		High	32.36		High	38.42	0.0229273	High	43.76	0.0067148	High
FDWDHPMHLQPTSPTAFK	99	2	1	LOC_Os03g55070.2	UDP-glucose 6-dehydrogenase, putative, expressed	S13(Phospho)	2234.98	2.06431e+10	1.06293e+09	3.2831e+09	1.94017e+10	2.07223e+10	2.18053e+10	1.65829e+09		1.53051e+09	5.67002e+09		4.17928e+09	0.972358	T(12): 1.4; S(13): 97.2; T(15): 1.4	0	3.905e-06	350.931	High	36.85	0.0322819	High	43.36	0.00712966	High	26.16	0.377438	High	38.03	0.0245463	High	32.41		High	43.12	0.00760544	High	41.42	0.0113322	High	43.66	0.00803578	High
FFDPLGLGGETR	15	1	1	LOC_Os04g38410.1	chlorophyll A-B binding protein, putative, expressed	T11(Phospho)	1388.63	0	3.35448e+07	6.37818e+07	1.68017e+07				5.01602e+07	5.04742e+07	5.99122e+07	6.35053e+07	6.79279e+07	1	T(11): 100.0	0	1.309e-05	449.194	High	42.34	0.00707427	High	36.53	0.0267131	High	42.25	0.00714497	High	30.31		High	37.44	0.0216633	High	43.81	0.0050346	High	48.89	0.00151137	High	28.93		High
FFGLADSQK	9	1	1	LOC_Os06g18850.1	cadmium tolerance factor, putative, expressed	S7(Phospho)	1092.48	0	1.76181e+07	1.49576e+07	7386983			1.49985e+07	1.8289e+07	1.95669e+07	1.6899e+07	1.31332e+07	1.48407e+07	1	S(7): 100.0	0	0.003179	264.606										High	34.21	0.0300986	High	35.38	0.0230339	High	42.25	0.00472658	High	49.61	0.000867507	High	27.06		High
FGAADTFK	10	3	2	LOC_Os08g08110.1 ;LOC_Os04g54200.2	diacylglycerol kinase, putative, expressed	T6(Phospho)	936.389	0	0	1.80137e+07					3.59411e+07		2.74552e+07	2.65857e+07		1	T(6): 100.0	0.002	0.03822	236.997	High	32.84	0.0219438	High	24.17	0.161552	High	33.74	0.0178366				High	34.07	0.0165315				High	25.8
FGAADTFKFPDEVDVAHLS	5	2	1	LOC_Os04g54200.2	diacylglycerol kinase, putative, expressed	T6(Phospho)	2145.97	6.58708e+06	0	1.09426e+07	1.02186e+07		9.54261e+06				1.7764e+07		1.50637e+07	1	T(6): 100.0; S(19): 0.0	0	1.837e-05	316.327							High	14.94	4.97292										High	39.22	0.0201112				High
FGAADTFKIPDEVDIAHLS	28	1	1	LOC_Os08g08110.1	diacylglycerol kinase, putative, expressed	T6(Phospho)	2125.99	4.48003e+07	0	6.43637e+07	4.56563e+07	5.00849e+07	3.86596e+07		5.76817e+07		5.34648e+07	5.16559e+07	8.79704e+07	1	T(6): 100.0; S(19): 0.0	0	3.816e-16	494.358	High	44.59	0.00556405	High	46.76	0.00339595	High	41.93	0.0102594	High	32.14		High	44.83	0.00526327	High	35.06		High	41.84	0.0103007	High	38.76	0.0214004	High
FGGTTPSWSSGR	7	4	1	LOC_Os08g12760.4	YT521-B, putative, expressed	T5(Phospho)	1319.54	3.77201e+07	0	4.39802e+07	5.97724e+07		5.33881e+07				4.90423e+07	4.47098e+07	3.81886e+07	0.5	T(4): 50.0; T(5): 50.0; S(7): 0.0; S(9): 0.0; S(10): 0.0	0	0.0002203	260.805																			High	48.03	0.00112146	High	15.81		High
FGSLLKK	2	2	1	LOC_Os05g02820.1	protein transport protein-related, putative, expressed	S3(Phospho)	872.466	1.99503e+07	0	0	3.00899e+07		2.9761e+07							1	S(3): 100.0	0.001	0.0145	223.989																			High	38.27	0.017634				High
FGSSSPGGDMK	16	1	1	LOC_Os05g41790.1	zinc finger C-x8-C-x5-C-x3-H type family protein, expressed	S5(Phospho)	1149.43	3.63279e+07	0	4.63975e+07		5.44125e+07	5.45713e+07				5.24432e+07	4.36499e+07	4.30993e+07	0.999998	S(3): 0.0; S(4): 0.0; S(5): 100.0	0	0.0004866	257.191	High	27.66	0.0614454	High	24.57	0.125167	High	26.13	0.0854453	High	23.01		High	23.86		High	9.87		High	27.66		High	37.62	0.0065906	High
FGTDMSPDAK	3	2	1	LOC_Os03g30570.1	protein of unknown function DUF1675 domain containing protein, expressed	S6(Phospho)	1148.44	0	7.46534e+07	0				8.10937e+07	7.18222e+07	7.10442e+07				1	T(3): 0.0; S(6): 100.0	0	0.00668	264.309										High	32.45	0.0298648	High	40.53	0.00464686	High	33.32	0.0250718
FHGHGHHSSGTTPTGAAASPK	28	1	1	LOC_Os04g33110.1	expressed protein	S19(Phospho)	2121.93	5.58632e+07	0	0	9.42016e+07	7.33879e+07								0.999997	S(8): 0.0; S(9): 0.0; T(11): 0.0; T(12): 0.0; T(14): 0.0; S(19): 100.0	0	1.475e-09	443.407																			High	42.26	0.00978799	High	36.97	0.03315	High
FHGHHSTNTTPTGAAASSPR	85	1	1	LOC_Os02g32469.2	expressed protein	S18(Phospho)	2113.92	1.13134e+09	0	0	1.18068e+09	1.08795e+09	1.1254e+09						4.57025e+08	0.999998	S(6): 0.0; T(7): 0.0; T(9): 0.0; T(10): 0.0; T(12): 0.0; S(17): 0.0; S(18): 100.0	0	6.528e-08	434.293	High	19.59	1.83589	High	28.66	0.227497	High	16.58	3.67372	High	13.17		High	10.1		High	17.99		High	44.18	0.00636128	High	44.22	0.00633891	High
FHGHHSTNTTPTGAAASSPR	54	1	1	LOC_Os02g32469.2	expressed protein	S6(Phospho); S18(Phospho)	2193.89	2.08044e+08	0	0	2.13573e+08	2.08203e+08	2.02355e+08				1.09056e+08			0.493364	S(6): 49.4; T(7): 49.4; T(9): 1.2; T(10): 0.0; T(12): 0.0; S(17): 0.1; S(18): 99.9	0	6.225e-05	307.716	High	31.39	0.0972256	High	18.1	2.04444	High	25.74	0.337224	High	26.4		High	33.94		High	22.3		High	46.31	0.00297968	High	40.82	0.0108336	High
FIDAPPSPPQSK	37	1	1	LOC_Os05g46330.1	MYB family transcription factor, putative, expressed	S7(Phospho)	1363.63	1.32137e+08	0	2.55632e+07	1.38901e+08	1.42041e+08	1.15469e+08				3.86933e+07	3.79962e+07		0.999999	S(7): 100.0; S(11): 0.0	0	5.609e-05	288.185	High	34.5	0.0398988	High	50.88	0.000887217													High	49.04	0.00142825	High	45.15	0.00350705	High
FKTEDGIFGTSGGIGFTK	42	2	1	LOC_Os01g64960.1	chlorophyll A-B binding protein, putative, expressed	T3(Phospho)	1941.9	1.91013e+08	9.06427e+08	6.68992e+08	1.93356e+08	1.96586e+08	1.83096e+08	9.10233e+08	9.50534e+08	8.58515e+08	6.50155e+08	7.30214e+08	6.26606e+08	1	T(3): 100.0; T(10): 0.0; S(11): 0.0; T(17): 0.0	0	1.042e-11	456.96	High	119.73	1.6441e-10	High	115.83	3.76674e-10	High	128.67	1.9451e-11	High	95.64	3.92018e-08	High	110.93	1.25606e-09	High	126.08	3.5326e-11	High	77.57	2.55128e-06	High	82.47	8.13686e-07	High
FNEQSEHDVPAVER	12	1	1	LOC_Os04g44430.1	transporter, major facilitator family, putative, expressed	S5(Phospho)	1736.73	0	8.56629e+07	3.02643e+07				7.7506e+07	8.44967e+07	9.49861e+07	5.11156e+07		3.96774e+07	1	S(5): 100.0	0	5.461e-06	456.57										High	76.41	2.42616e-06	High	76.37	2.46591e-06	High	76.84	2.21505e-06							High
FNPSPPSPK	52	1	1	LOC_Os09g04990.1	cytoskeletal protein, putative, expressed	S7(Phospho)	1050.47	1.46486e+08	0	9.33993e+07	179523688	1.75294e+08	8.46412e+07		6.10412e+07		6.76045e+07	9.18604e+07	1.20733e+08	1	S(4): 0.0; S(7): 100.0	0	0.01549	293.387	High	33.28	0.0337619	High	29.3	0.0844164	High	33.67	0.0264165				High	33.71	0.0304728	High	21.77		High	38.5	0.0102621	High	41.28	0.00545144	High
FNSEPMMK	7	1	1	LOC_Os01g45990.1	potassium channel AKT1, putative, expressed	S3(Phospho)	1063.4	0	0	2.3575e+07							2.63354e+07	2.10135e+07	2.3376e+07	1	S(3): 100.0	0	0.01079	252.012				High	21.32	0.340543																High	20.98		High
FQDQGGNMTAETGTYR	5	1	1	LOC_Os12g06670.1	protein kinase family protein, putative, expressed	M8(Oxidation); T9(Phospho)	1871.73	0	0	7.30851e+06						2.48687e+07	4.4816e+06		1.74439e+07	0.999997	T(9): 100.0; T(12): 0.0; T(14): 0.0; Y(15): 0.0	0	6.651e-05	290.374										High	7.9		High	30.35		High	39.81	0.00940248
FRPSSSFDTK	58	3	1	LOC_Os02g02400.2	catalase isozyme A, putative, expressed	S6(Phospho)	1251.54	1.37219e+09	6.22856e+08	1.71276e+09	1349990336	1.32674e+09	1.43983e+09	6.4787e+08	6.21925e+08	5.98774e+08	1.78188e+09	1.57387e+09	1.78252e+09	0.990365	S(4): 0.0; S(5): 1.0; S(6): 99.0; T(9): 0.0	0	0.01706	237.755	High	35.62	0.0257571	High	37.57	0.0162211	High	45.22	0.00280617	High	45.76	0.00246746	High	45.83	0.00245021	High	35.17	0.0284627	High	50.15	0.000904224	High	37.74	0.0157246	High
FRSLDFGER	19	1	1	LOC_Os12g38000.1	60S ribosomal protein L8, putative, expressed	S3(Phospho)	1206.53	0	0	1.54174e+08							1.67068e+08	1.4172e+08	1.53734e+08	1	S(3): 100.0	0	0.0004533	289.609	High	25.56	0.218207	High	15.43	2.28418	High	22.43	0.447754	High	23.14		High	24.72		High	23.48		High	20.13					High
FSASSLDNASGK	18	1	1	LOC_Os02g40430.1	HEAT repeat family protein, putative, expressed	S4(Phospho)	1263.53	1.12857e+08	7.82085e+07	0	1.12695e+08	1.13348e+08	1.12527e+08	8.21052e+07	7.38746e+07	7.86456e+07			8.29092e+07	0.999952	S(2): 0.0; S(4): 100.0; S(5): 0.0; S(10): 0.0	0	3.617e-05	374.714	High	73	4.86152e-06	High	73.48	4.35732e-06	High	74.33	3.58831e-06	High	54.76	0.000324838	High	61.77	6.38995e-05	High	66.24	2.3198e-05	High	69.22	1.24401e-05	High	68.45	1.48534e-05	High
FSEIPYIMEDASNANDSPR	19	1	1	LOC_Os01g48720.1	RNA polymerase III subunit RPC82 family protein, putative, expressed	S17(Phospho)	2235.93	5.85143e+07	1.81154e+07	6.571e+07	62698492	4.66263e+07	6.62183e+07		2.81609e+07	2.61853e+07	6.069e+07	6.74969e+07	6.89431e+07	1	S(2): 0.0; Y(6): 0.0; S(12): 0.0; S(17): 100.0	0	9.814e-08	537.275	High	42.96	0.00729146	High	40.41	0.0130118	High	39.11	0.0165213				High	38.51	0.0186167	High	47.67	0.00234614	High	43	0.0078085	High	48.09	0.00247916	High
FSFEETTATLHLK	11	1	1	LOC_Os03g62620.3	late embryogenesis abundant protein, putative, expressed	S2(Phospho)	1603.74	3.18263e+07	0	4.36834e+07	4.14983e+07	2.92513e+07	2.47293e+07				3.76045e+07	4.66652e+07	4.67805e+07	1	S(2): 100.0; T(6): 0.0; T(7): 0.0; T(9): 0.0	0	1.446e-05	328.251	High	53.93	0.000540716				High	63.45	5.90576e-05										High	54.75	0.000442657	High	68.38	1.89646e-05	High
FSVSPVVR	5	5	1	LOC_Os02g32030.1	elongation factor, putative, expressed	S4(Phospho)	970.479	6.76453e+06	0	0	5.37289e+06	6.97824e+06	7.94248e+06							1	S(2): 0.0; S(4): 100.0	0	0.01052	248.199				High	26.48	0.144727													High	36.55	0.0141195	High	38.5	0.00908968	High
FVESNPLNSYSSNEELVMMPK	38	1	1	LOC_Os01g72860.1	MAC/Perforin domain containing protein, putative, expressed	S9(Phospho)	2495.09	3.49142e+07	4.75567e+07	7.77594e+07	4.77915e+07	2.43603e+07	3.25909e+07	3.99978e+07	5.66826e+07	4.59898e+07	7.76074e+07	7.00098e+07	8.56611e+07	0.987424	S(4): 0.0; S(9): 98.7; Y(10): 1.3; S(11): 0.0; S(12): 0.0	0	2.862e-07	419.455	High	41.01	0.0158342	High	30.51	0.177262	High	23.62	0.891615	High	79.54	2.20401e-06	High	53.58	0.000884736	High	70.15	1.94418e-05	High	73.65	8.91087e-06	High	68.45	2.86636e-05	High
FVPGISKSQEFDTK	16	1	1	LOC_Os05g35530.1	expressed protein	S8(Phospho)	1662.79	0	2.96493e+07	4.74067e+07		2.46031e+07		4.72541e+07	4.16937e+07		4.68954e+07	4.71898e+07	4.81348e+07	1	S(6): 0.0; S(8): 100.0; T(13): 0.0	0	0.001933	383.694	High	25.19	0.43633	High	31.66	0.101532	High	21.08	1.11399	High	51.01	0.0011729	High	51.05	0.00115862	High	28.87		High	28.4		High	39.95	0.0148904	High
FYMEPDTSDSGSMASGAHTR	13	2	1	LOC_Os02g45070.2	PINHEAD, putative, expressed	S8(Phospho)	2226.85	1.53655e+07	0	5.96111e+07	1.37479e+07		3.23487e+07				7.11148e+07	4.85641e+07	5.91543e+07	0.977852	Y(2): 0.0; T(7): 0.1; S(8): 97.8; S(10): 2.2; S(12): 0.0; S(15): 0.0; T(19): 0.0	0	3.172e-07	260.193				High	20.15	0.753037				High	25.56								High	36.52	0.0176492	High	23.57		High
GAAAATPPEPVSPSAR	22	2	1	LOC_Os01g56360.1	wax synthase, putative, expressed	S12(Phospho)	1558.73	0	6.14398e+08	0				9.17822e+08	9.25371e+08					0.990065	T(6): 0.0; S(12): 99.0; S(14): 1.0	0	0.002825	357.183	High	23.03	0.63561	High	25.99	0.317857	High	27.75	0.212956	High	34.2	0.0479229	High	38.07	0.0196582	High	32.06		High	28.63		High	38.04	0.0198572	High
GAASASGGGGAAPEAQQQLSGGGDTPR	9	1	1	LOC_Os07g02710.1	expressed protein	T25(Phospho)	2435.07	8.55223e+07	0	0	1.29424e+08	1.27143e+08							7.00108e+07	1	S(4): 0.0; S(6): 0.0; S(20): 0.0; T(25): 100.0	0	3.305e-09	477.134										High	20.79								High	48.83	0.00263931	High	50.74	0.00150198	High
GAASSASASMRK	8	1	1	LOC_Os12g36180.1	auxilin, putative, expressed	S9(Phospho)	1203.52	0	0	7.19074e+06							1.1127e+07		1.04452e+07	0.999999	S(4): 0.0; S(5): 0.0; S(7): 0.0; S(9): 100.0	0	0.0005858	312.133										High	25.34								High	24.13		High	31.19		High
GADHQNAGGATSEPSESHR	27	1	1	LOC_Os12g31350.1	SSXT protein, putative, expressed	S15(Phospho)	1987.79	1.65305e+07	0	0		3.4203e+07	1.53884e+07							0.991514	T(11): 0.0; S(12): 0.0; S(15): 99.2; S(17): 0.8	0	2.146e-05	390.995				High	10.25	9.80879							High	0.22					High	27.97		High	43.78	0.00435545	High
GAGALMPTTPTPTSAGLR	28	1	1	LOC_Os02g56280.1	zinc finger family protein, putative, expressed	T9(Phospho)	1778.86	3.75323e+07	0	3.71584e+07	60546046	5.20507e+07					6.00381e+07	5.14371e+07		0.987986	T(8): 0.0; T(9): 98.8; T(11): 1.2; T(13): 0.0; S(14): 0.0	0	1.752e-05	313.717	High	42.3	0.0101576	High	27.13	0.330547	High	32.29	0.10178	High	18.54		High	20.61		High	15.69		High	50.17	0.00165445	High	37.14	0.0334617	High
GANSGAQSGDGEYLK	7	2	1	LOC_Os03g52320.2	GRF-interacting factor 1, putative, expressed	S8(Phospho)	1533.63	2.96647e+07	0	0	4.41653e+07	4.48289e+07								0.999895	S(4): 0.0; S(8): 100.0; Y(13): 0.0	0	4.111e-05	299.265	High	25.57	0.192191	High	8.27	11.0436													High	51.26	0.000571227	High	50.67	0.000694201
GAPSPHPQPVHHHHPHVTPTIAVSDSSLK	78	2	1	LOC_Os03g15050.2	phosphoenolpyruvate carboxykinase, putative, expressed	S4(Phospho)	3147.54	9.10668e+08	0	1.50763e+08	9.83284e+08	9.63704e+08	7.85017e+08					2.14044e+08	2.38244e+08	1	S(4): 100.0; T(18): 0.0; T(20): 0.0; S(24): 0.0; S(26): 0.0; S(27): 0.0	0	2.712e-08	340.748	High	25.42	0.559659	High	20.08	2.05971	High	21.29	1.463	High	24.53								High	77.45	3.48351e-06	High	60.64	0.000168367	High
GASGIGGKPVAGYDAADEAR	15	1	1	LOC_Os02g51860.1	dehydration response related protein, putative, expressed	S3(Phospho)	1941.88	5.30179e+07	0	5.74534e+07	5.6874e+07	4.87709e+07	5.34088e+07	8.83709e+06			5.68148e+07	5.51062e+07	6.04392e+07	1	S(3): 100.0; Y(13): 0.0	0	3.816e-16	525.847	High	50.76	0.0013104				High	45.22	0.00440841	High	36.05	0.0359185	High	29.2		High	34.2		High	60.11	0.00014776	High	51.01	0.00120817	High
GASPPRNDIVNEEVDQR	17	1	1	LOC_Os01g41190.1	glycine-rich protein, putative, expressed	S3(Phospho)	1975.89	0	0	7.60926e+07		9.69159e+08					1.26361e+08	7.79387e+07	2.39779e+07	1	S(3): 100.0	0	0.0005884	369.698	High	8.57	19.7651	High	34.46	0.0538398	High	28.07	0.234245										High	34.07		High	35.33	0.0439341	High
GASQRHDEAGYAPVATSAAAAAAADEPAGK	4	1	1	LOC_Os02g46090.1	CAMK_CAMK_like.15 - CAMK includes calcium/calmodulin depedent protein kinases, expressed	S3(Phospho)	2891.32	5.72736e+07	0	0	5.7001e+07	5.42252e+07	6.05947e+07							0.999714	S(3): 100.0; Y(11): 0.0; T(16): 0.0; S(17): 0.0	0	4.858e-11	518.126																			High	88.57	3.01759e-07	High	70.14	2.20671e-05	High
GASVSEEGDKSPR	33	1	1	LOC_Os02g50840.1	BAH domain containing protein, putative, expressed	S11(Phospho)	1398.59	2.15805e+08	4.78207e+08	3.15963e+08	2.08592e+08	2.0532e+08	2.33503e+08	4.68174e+08	4.42252e+08	5.24194e+08	3.25236e+08	3.12948e+08	3.09707e+08	1	S(3): 0.0; S(5): 0.0; S(11): 100.0	0	6.145e-07	465.037	High	65.15	2.54628e-05	High	59.65	9.03453e-05	High	38.33	0.0121921	High	58.49	0.000117936	High	58.38	0.000120525	High	51.3	0.000617511	High	48.64	0.00114342	High	48.09	0.00129624	High
GASVSEEGDKSPR	14	1	1	LOC_Os02g50840.1	BAH domain containing protein, putative, expressed	S5(Phospho); S11(Phospho)	1478.56	0	0	5.57662e+07	44941222					9.47811e+07	4.48849e+07	6.59477e+07	5.64659e+07	1	S(3): 0.0; S(5): 100.0; S(11): 100.0	0	8.168e-05	391.509				High	22.06	0.366224				High	34.67	0.0201986	High	33.8	0.0247204	High	39.7	0.00633804	High	35.27	0.0176071	High	28.35		High
GATDSDSEVDFDR	3	1	1	LOC_Os07g49380.1	PWWP domain containing protein, expressed	S5(Phospho)	1493.55	0	0	1.78963e+07			2.08325e+07					2.65515e+07	2.71374e+07	0.999922	T(3): 0.0; S(5): 100.0; S(7): 0.0	0	0.0001335	294.818																									High
GDEDDEKFSISDEPEAEQVLVATK	5	2	1	LOC_Os01g35050.1	early-responsive to dehydration protein-related, putative, expressed	S9(Phospho)	2731.2	2.29181e+07	0	0	3.49305e+07	3.38238e+07								0.999611	S(9): 100.0; S(11): 0.0; T(23): 0.0	0	6.818e-07	298.858							High	15.27	5.18259							High	32.32		High	48.27	0.00263468	High	44.35	0.00649355
GDGDGAITPEDGSAVTENPK	17	1	1	LOC_Os02g15660.1	tetratricopeptide repeat, putative, expressed	T8(Phospho)	2009.84	0	5.78917e+07	5.80768e+07			4.40562e+07	3.78854e+07	6.01708e+07	7.56189e+07	6.53142e+07	5.58755e+07	5.30409e+07	1	T(8): 100.0; S(13): 0.0; T(16): 0.0	0	1.915e-08	366.22	High	41.51	0.0104535	High	36.8	0.0309216	High	52.9	0.000755188	High	48.88	0.00197818	High	42.24	0.00971078	High	48.77	0.00196454	High	40.41	0.0134167	High	26.64		High
GDGDLSSPMAPVPYPFEGVIR	36	1	1	LOC_Os08g36790.1	bZIP transcription factor, putative, expressed	S6(Phospho)	2284.04	4.2342e+07	0	4.5955e+07		3.94581e+07	8.75679e+07		5.80423e+07		8.21232e+07	5.57419e+07		0.999997	S(6): 100.0; S(7): 0.0; Y(14): 0.0	0	8.252e-07	368.231	High	31.2	0.133472	High	28.37	0.256234	High	36.46	0.0399694	High	34.08		High	37.35	0.0321675	High	34.51					High	49.15	0.0022019	High
GDGEGSTGGGGGGGDPQR	6	1	1	LOC_Os01g42010.1	expressed protein	S6(Phospho)	1597.59	2.4565e+06	0	6.87938e+06	3.84462e+06	3.52489e+06		1.06042e+07			7.34855e+06	6.20099e+06	7.0886e+06	0.984997	S(6): 98.5; T(7): 1.5	0	5.959e-06	318.084										High	72.43	2.90025e-06							High	69.42	5.6401e-06	High	56.04	0.000125438
GDQGSGAGQDEPVKK	9	1	1	LOC_Os02g57820.1	AT hook motif domain containing protein, expressed	S5(Phospho)	1552.66	8.43017e+06	0	7.64246e+06	1.32429e+07	1.20476e+07					1.07493e+07		1.2178e+07	1	S(5): 100.0	0	2.403e-05	299.784				High	14.39	3.64097													High	41.4	0.00733491	High	37.51	0.0182121	High
GDRSPSLDGADDQMFDAFR	25	1	1	LOC_Os06g48530.1	ZOS6-09 - C2H2 zinc finger protein, expressed	S4(Phospho); S6(Phospho)	2259.84	8.9344e+07	3.04626e+07	2.22168e+08	9.89558e+07	8.02698e+07	8.88064e+07	1.63208e+07	3.94669e+07	3.56002e+07	2.99868e+08	1.82628e+08	1.84007e+08	1	S(4): 100.0; S(6): 100.0	0	3.816e-16	672.516	High	58.54	9.8321e-05	High	46.78	0.0014829	High	54.57	0.000247191	High	32.06	0.0441211	High	56.84	0.000149154	High	42.54	0.0039393	High	43.18	0.00368323	High	54.28	0.000335552	High
GDRSPSLDGADDQMFDAFR	11	1	1	LOC_Os06g48530.1	ZOS6-09 - C2H2 zinc finger protein, expressed	S4(Phospho)	2179.88	1.84603e+07	0	0		2.9355e+07	2.60261e+07				4.44606e+07			0.999841	S(4): 100.0; S(6): 0.0	0	8.973e-09	408.064				High	29.58	0.119572																High	52.19	0.000669477	High
GDSDEDARPK	9	1	1	LOC_Os11g34190.1	expressed protein	S3(Phospho)	1169.45	0	1.07745e+07	6.76899e+06			3.88937e+06	1.74595e+07	1.48639e+07		4.78052e+06	8.48963e+06	7.03682e+06	1	S(3): 100.0	0	0.0008911	253.58										High	37.39	0.00732294	High	34.56	0.0137353	High	26.04								High
GDSEDDEPVMVVAK	26	1	1	LOC_Os04g50204.1	protein transport protein-related, putative, expressed	S3(Phospho)	1570.64	4.5469e+08	1.87308e+08	2.75612e+08	4.46286e+08	4.29736e+08	4.8805e+08	1.97882e+08	1.97037e+08	1.67004e+08	3.04834e+08	2.47448e+08	2.74554e+08	1	S(3): 100.0	0	9.062e-07	414.69	High	101.85	5.0389e-09	High	101.74	5.13132e-09	High	101.8	4.91556e-09	High	78.12	1.18094e-06	High	96.09	1.88095e-08	High	76.92	1.5324e-06	High	101.84	4.89013e-09	High	108.89	9.87137e-10	High
GDSEDDEPVMVVAK	12	1	1	LOC_Os04g50204.1	protein transport protein-related, putative, expressed	S3(Phospho); M10(Oxidation)	1586.64	4.42712e+07	0	0	4.73546e+07	4.34803e+07	4.19787e+07					1.82458e+07		1	S(3): 100.0	0	3.048e-06	263.931	High	52.18	0.000504854	High	47.94	0.00134099	High	47.71	0.00141054				High	24.35					High	52.92	0.000453584	High	41.51	0.00617322	High
GEDAGDPSVAYGDSTTGNTPR	6	1	1	LOC_Os06g43630.1	sucrose-phosphate synthase, putative, expressed	T19(Phospho)	2146.86	1.45616e+07	0	0	2.07977e+07		2.2887e+07							0.999999	S(8): 0.0; Y(11): 0.0; S(14): 0.0; T(15): 0.0; T(16): 0.0; T(19): 100.0	0	1.79e-08	526.483																			High	54.41	0.00040535	High	25.76		High
GEDNSPHASAAVVTDAEVTK	28	1	1	LOC_Os09g04990.1	cytoskeletal protein, putative, expressed	S5(Phospho)	2077.91	1.57104e+07	0	0	2.68299e+07	2.03014e+07								1	S(5): 100.0; S(9): 0.0; T(14): 0.0; T(19): 0.0	0	6.583e-08	428.87				High	12.5	11.6855	High	7.47	36.8507	High	19.54		High	12.15					High	64.83	6.44714e-05	High	48.45	0.00295424	High
GEGMSAVADSGEGR	37	2	1	LOC_Os06g02370.3	expressed protein	S10(Phospho)	1402.53	6.7789e+07	2.01707e+08	1.45631e+08	7.37886e+07	6.81109e+07	6.14676e+07	1.99444e+08	1.95334e+08	2.10343e+08	1.51421e+08	1.35787e+08	1.49685e+08	1	S(5): 0.0; S(10): 100.0	0	9.854e-08	382.854	High	39.82	0.005665	High	37.88	0.00896113	High	42.63	0.00300167	High	65.27	1.63442e-05	High	64.12	2.14347e-05	High	63.74	2.25071e-05	High	52.76	0.000282311	High	63.49	2.4669e-05	High
GEGMSAVADSGEGR	6	2	1	LOC_Os06g02370.3	expressed protein	M4(Oxidation); S10(Phospho)	1418.52	0	1.81989e+07	0				1.91586e+07	1.67869e+07	1.86512e+07			1.40301e+07	1	S(5): 0.0; S(10): 100.0	0	0.0001688	311.447										High	47.02	0.000766633	High	50.02	0.000410107	High	50.32	0.000357652
GEKPGSGAAEVESGGEVGGK	11	3	1	LOC_Os11g01620.2	inactive receptor kinase At2g26730 precursor, putative, expressed	S13(Phospho)	1881.83	3.04225e+07	0	0	2.71497e+07	2.97627e+07	3.4355e+07						2.27969e+07	1	S(6): 0.0; S(13): 100.0	0	3.175e-07	431.014	High	23.41	0.590112							High	26.85		High	29.99		High	23.93		High	50.67	0.00111115	High	38.33	0.0191621	High
GETGVAVASSPR	33	1	1	LOC_Os09g26800.1	polygalacturonase, putative, expressed	S9(Phospho)	1210.55	9.03858e+07	0	9.76506e+07	139174040	1.31983e+08						1.50754e+08	1.42197e+08	0.5	T(3): 0.0; S(9): 50.0; S(10): 50.0	0	4.658e-13	336.897	High	33.99	0.0427755	High	31.55	0.0748131	High	30.93	0.0823783	High	30.22		High	25.75					High	34.35	0.038987	High	38.4	0.0154951	High
GEVADQLSNDEDVGGR	3	1	1	LOC_Os10g08570.1	RNA recognition motif family protein, expressed	S8(Phospho)	1740.71	0	2.00031e+07	0				1.50263e+07	2.28514e+07	2.21316e+07				1	S(8): 100.0	0	4.919e-07	401.923										High	57.9	0.000143044	High	61.03	6.93014e-05	High	68.42	1.24672e-05
GFEQFPPEYESELQLNATFTPAAFSPR	41	1	1	LOC_Os01g38229.2	peptidyl-prolyl isomerase, putative, expressed	S25(Phospho)	3153.44	5.42388e+07	0	4.72304e+07	5.00271e+07	2.47405e+07	8.79488e+07				6.59475e+07	7.57435e+07		1	Y(9): 0.0; S(11): 0.0; T(18): 0.0; T(20): 0.0; S(25): 100.0	0	3.745e-07	381.014	High	33.62	0.0920944	High	32.95	0.102691				High	26.18		High	30.47		High	34.63		High	39.36	0.0234594	High	38.45	0.0299925	High
GFFLHPSPR	19	2	2	LOC_Os01g54400.1 ;LOC_Os05g44270.1	VQ domain containing protein, putative, expressed	S7(Phospho)	1137.53	1.83365e+08	0	6.01717e+07	1.85766e+08	1.73934e+08	1.90395e+08				1.00643e+08		7.9872e+07	1	S(7): 100.0	0	0.0003094	389.383	High	23.65	0.318893	High	23.05	0.367129				High	21.8		High	27.09		High	21.69		High	38.92	0.0092969	High	38.33	0.0115972	High
GFMSPNMGKPVGDLELGR	19	2	1	LOC_Os09g33450.2	zinc finger DHHC domain-containing protein, putative, expressed	S4(Phospho)	1984.92	3.59478e+07	0	0	38378810	3.50253e+07	3.44394e+07				3.30317e+07			1	S(4): 100.0	0	8.477e-07	389.233	High	13.63	7.9831							High	25.97		High	24.35		High	30.67		High	53.31	0.000895519	High	47.67	0.00329434	High
GFVPFVPGSPVER	20	1	1	LOC_Os05g05590.1	transporter, monovalent cation:proton antiporter-2 family, putative, expressed	S9(Phospho)	1467.71	0	0	4.15435e+08		3.10532e+08		8.12673e+08			6.85243e+08	5.61062e+08		1	S(9): 100.0	0	0.0002327	515.261	High	28.02	0.204222	High	28.65	0.176031	High	34.44	0.0464077	High	34.78	0.0423143	High	30.99		High	26.36		High	33.51		High	35.33	0.0404903	High
GGDRGSPDYHR	93	4	1	LOC_Os02g03040.4	RNA recognition motif containing protein, expressed	S6(Phospho)	1296.51	4.31185e+08	1.76784e+09	2.12797e+09	5.76921e+08	7.16635e+08		2.35877e+09		2.94475e+09	1.87078e+09	2.4208e+09	2.09235e+09	1	S(6): 100.0; Y(9): 0.0	0	0.01171	269.025	High	33.45	0.0342055	High	33.88	0.0311038	High	31.68	0.0516195	High	39.81	0.00793987	High	28.62		High	36.93	0.0154104	High	33.98	0.0303958	High	32.84	0.0397797	High
GGDSDSDFDEFGSMDVTK	10	1	1	LOC_Os06g22820.1	cyclin-dependent kinase F-1, putative, expressed	S4(Phospho)	1988.71	2.09781e+07	0	0	2.20753e+07	1.89572e+07	2.19018e+07				2.90288e+07			1	S(4): 100.0; S(6): 0.0; S(13): 0.0; T(17): 0.0	0	1.223e-07	388.86	High	67.87	7.84681e-06				High	72.89	2.46741e-06										High	70.54	4.59643e-06	High	74.53	1.79357e-06	High
GGDSWDEPFPSSAAAAAAAAGGGR	7	1	1	LOC_Os01g04650.1	PB1 domain containing protein, expressed	S4(Phospho)	2255.94	2.66448e+07	0	1.41317e+07	3.7586e+07		4.23484e+07				1.83172e+07	2.40778e+07		1	S(4): 100.0; S(11): 0.0; S(12): 0.0	0	2.613e-10	396.725																			High	98.3	2.1277e-08	High	33.03		High
GGEAAAAAAGESPGQR	5	1	1	LOC_Os01g43580.1	kinesin motor domain containing protein, putative, expressed	S12(Phospho)	1479.63	5.12886e+07	0	0	6.04187e+07	5.51956e+07	3.82513e+07							1	S(12): 100.0	0	1.641e-06	390.795																			High	43.96	0.00367839	High	49.14	0.00110319	High
GGFDGMYSPGGGLR	30	2	1	LOC_Os02g34560.2	plant neutral invertase domain containing protein, expressed	M6(Oxidation); S8(Phospho)	1466.58	1.4987e+08	3.74085e+08	3.67072e+08	2.39369e+08	7.70661e+07	1.33174e+08	3.77096e+08	3.34169e+08	4.10988e+08	3.60676e+08	3.32693e+08	4.07846e+08	0.999921	Y(7): 0.0; S(8): 100.0	0	3.816e-16	384.098	High	62.58	4.30344e-05	High	63.02	3.91624e-05	High	66.36	1.81844e-05	High	69.29	9.3973e-06	High	62.23	4.69753e-05	High	62.98	3.85681e-05	High	55.43	0.000229134	High	50.63	0.000691974	High
GGGEESAGSGGAAGGLFK	27	2	1	LOC_Os10g18340.1	expressed protein	S9(Phospho)	1588.67	6.0251e+07	1.34515e+08	9.71176e+07	6.85288e+07	4.7625e+07	6.45993e+07	1.43267e+08	1.32998e+08	1.2728e+08	1.09798e+08	8.81876e+07	9.33666e+07	1	S(6): 0.0; S(9): 100.0	0	1.087e-08	446.727	High	70.13	9.97684e-06	High	77.28	1.91932e-06	High	74.54	3.64744e-06	High	74	4.13832e-06	High	74.4	3.76512e-06	High	74.41	3.70393e-06	High	62.28	6.19661e-05	High	67.06	2.01216e-05	High
GGGGGGGDEDTDDEDWTGGGAR	5	1	1	LOC_Os07g01940.1	sister chromatid cohesion 2, putative, expressed	T11(Phospho)	2117.74	0	2.91035e+07	0			2.99467e+07	4.04419e+07	4.68686e+07		3.77243e+07			1	T(11): 100.0; T(17): 0.0	0	2.202e-08	373.736										High	75.69	1.42441e-06	High	75.47	1.45018e-06										High
GGGGSAGLGSMNVEEILR	13	2	1	LOC_Os01g64730.2	bZIP transcription factor domain containing protein, expressed	S10(Phospho)	1783.81	0	5.14649e+07	4.26883e+07				5.75465e+07	5.69922e+07	3.98559e+07	5.31445e+07	3.66796e+07	3.82407e+07	1	S(5): 0.0; S(10): 100.0	0	5.191e-10	429.103	High	75.62	4.20146e-06	High	83.81	6.42998e-07	High	81.4	1.10802e-06	High	86.18	3.6739e-07	High	82.44	7.17267e-07	High	91.67	1.04464e-07
GGGGSAGLGSMNVEEILR	6	2	1	LOC_Os01g64730.2	bZIP transcription factor domain containing protein, expressed	S5(Phospho); S10(Phospho)	1863.76	0	2.76044e+07	2.51044e+07				3.05294e+07	3.94746e+07	1.28091e+07	2.98252e+07	2.30391e+07	2.24488e+07	1	S(5): 100.0; S(10): 100.0	0	3.816e-16	467.637										High	74.76	3.48064e-06	High	81.96	9.40229e-07	High	79.99	1.04991e-06
GGGPMLGFDSSPGR	45	1	1	LOC_Os07g33630.1	HEAT repeat family protein, putative, expressed	S11(Phospho)	1414.58	4.42051e+08	1.34229e+08	2.78122e+08	4.56197e+08	4.25494e+08	4.44461e+08	2.00395e+08	2.02291e+08		2.98478e+08	2.93577e+08	2.42309e+08	0.990103	S(10): 1.0; S(11): 99.0	0	7.701e-06	354.841	High	46.39	0.00156712	High	42.08	0.00428963	High	52.22	0.000415355	High	40.48	0.00624517	High	38.65	0.0094088	High	27.36		High	41.99	0.00433518	High	50.36	0.000636031	High
GGGVGVGDESGSDYESGGGMR	3	1	1	LOC_Os05g49270.1	transporter family protein, putative, expressed	S10(Phospho); S12(Phospho)	2089.72	0	0	1.85771e+07							3.19333e+07	2.37981e+07		0.982662	S(10): 100.0; S(12): 98.3; Y(14): 1.7; S(16): 0.0	0	7.747e-09	469.948																High	20.26
GGGVGVGGANYYVQSPSR	8	1	1	LOC_Os06g06780.1	harpin-induced protein, putative, expressed	S15(Phospho)	1804.81	8.01585e+07	0	0	1.06314e+08	4.95449e+07	8.46171e+07							0.990456	Y(11): 0.0; Y(12): 0.0; S(15): 99.0; S(17): 1.0	0	4.923e-09	478.801																			High	64.45	4.94594e-05	High	82.23	8.21918e-07	High
GGHFSGTSPNHPLPPPPR	35	1	1	LOC_Os01g46710.1	transposon protein, putative, CACTA, En/Spm sub-class, expressed	S8(Phospho)	1931.9	0	0	1.24159e+08						2.3015e+08		1.16685e+08	2.55792e+08	0.497479	S(5): 0.5; T(7): 49.7; S(8): 49.7	0	6.061e-06	314.241	High	29.64	0.152045	High	24.95	0.46352	High	19.66	1.52536	High	26.08		High	25.67		High	35.44	0.0403635				High	12.78		High
GGLEKPPAAAVAAAGMVSSGGGVQR	3	2	1	LOC_Os01g66120.1	No apical meristem protein, putative, expressed	S19(Phospho)	2318.14	2.75124e+07	0	0	28615506	3.20187e+07	2.1903e+07							0.98608	S(18): 1.4; S(19): 98.6	0	2.122e-11	475.627																			High	49.06	0.00178736	High	47.18	0.00283023	High
GGMEAVGGSGGR	28	1	1	LOC_Os05g30970.1	copine, putative, expressed	S9(Phospho)	1114.44	5.21756e+07	0	1.74175e+08		7.52375e+07	8.12894e+07		2.02965e+08		1.33984e+08	1.97246e+08	1.91293e+08	1	S(9): 100.0	0	0.001874	270.761	High	22.75	0.282165	High	20.8	0.443746	High	18.57	0.743625	High	28.28		High	34.09	0.0207644	High	28.81		High	22.98		High	37.62	0.00761984	High
GGMTSHAAVVAR	83	5	2	LOC_Os03g31750.2 ;LOC_Os05g33570.2	pyruvate, phosphate dikinase, chloroplast precursor, putative, expressed	M3(Oxidation); T4(Phospho)	1252.55	1.40466e+09	2.86316e+09	3.56553e+09	1399295390	1.43805e+09	1.37665e+09	2.76232e+09	2.50169e+09	3.32549e+09	3.35536e+09	3.26819e+09	4.07305e+09	1	T(4): 100.0; S(5): 0.0	0	0.0002472	352.231	High	46.41	0.00161249	High	62.97	3.58814e-05	High	47.6	0.0012321	High	39.43	0.00810718	High	50.09	0.000687602	High	53.55	0.000313957	High	34.7	0.0240918	High	40.36	0.00647536	High
GGNTSYVTSHSGSTTPK	46	1	1	LOC_Os08g10310.1	SHR5-receptor-like kinase, putative, expressed	S11(Phospho)	1760.75	2.11765e+07	0	1.02388e+08	31332066	3.21975e+07					1.04989e+08	1.03082e+08	9.90927e+07	0.987569	T(4): 0.0; S(5): 0.0; Y(6): 0.0; T(8): 0.0; S(9): 1.2; S(11): 98.8; S(13): 0.0; T(14): 0.0; T(15): 0.0	0	7.473e-07	338.471	High	15.42	3.3703	High	26.83	0.236125	High	37.71	0.0191206	High	20.2		High	23.19		High	15.09		High	36.96	0.0228356	High	38.64	0.0153733	High
GGSESGGGSAEDGSWWAER	5	1	1	LOC_Os04g41030.1	inactive receptor kinase At1g27190 precursor, putative, expressed	S3(Phospho)	1961.73	0	6.89339e+07	1.04733e+07				6.89846e+07	7.53921e+07	6.24249e+07	1.09397e+07	2.04801e+07		0.990203	S(3): 99.0; S(5): 1.0; S(9): 0.0; S(14): 0.0	0	6.098e-07	390.671										High	82.74	3.58375e-07	High	83.1	3.38192e-07	High	101.11	5.18889e-09
GGSLEKPLTFADK	8	1	1	LOC_Os05g41790.1	zinc finger C-x8-C-x5-C-x3-H type family protein, expressed	S3(Phospho)	1442.7	3.99538e+07	0	3.98675e+07	40975241	3.75167e+07	4.13695e+07				3.79641e+07	4.28134e+07	3.88251e+07	1	S(3): 100.0; T(9): 0.0	0	0.001351	343.323																			High	44.61	0.00468921	High	44.51	0.00484445	High
GGSQGSSSGLIVK	18	1	1	LOC_Os02g49080.1	KH domain containing protein, putative, expressed	S3(Phospho)	1256.59	7.33463e+07	6.86836e+07	0		1.16825e+08	1.03214e+08	8.8537e+07		1.17514e+08				1	S(3): 100.0; S(6): 0.0; S(7): 0.0; S(8): 0.0	0	2.077e-05	245.593	High	23.33	0.528154	High	30.09	0.108821	High	31.65	0.07588	High	45.69	0.003039	High	33.51		High	46.55	0.00248752	High	18.3		High	36.99	0.0228784	High
GGSTEMDSQR	15	1	1	LOC_Os01g21960.1	serine/threonine-protein kinase, putative, expressed	S3(Phospho)	1147.41	9.87926e+06	0	1.19769e+07	1.11997e+07	8.80164e+06	9.6364e+06			1.38473e+07	1.18444e+07	1.32261e+07	1.08603e+07	0.999873	S(3): 100.0; T(4): 0.0; S(8): 0.0	0	0.004248	202.693				High	9.94	2.20019				High	19.2		High	19.01		High	32.04	0.0150041	High	34.36	0.00754861	High	28.1	0.0336093	High
GGVASDDDDDKQASR	8	1	1	LOC_Os01g09080.1	WRKY DNA-binding domain containing protein, expressed	S5(Phospho)	1615.62	3.88752e+06	0	4.6916e+06		5.18585e+06	6.47672e+06				6.92896e+06	7.14584e+06		1	S(5): 100.0; S(14): 0.0	0	2.449e-06	352.398				High	52.7	0.000342626																High	52.83	0.000372133	High
GGVDSPSWR	30	2	1	LOC_Os09g36270.2	pantothenate kinase, putative, expressed	S5(Phospho)	1040.42	6.72451e+08	7.26482e+08	0	694551688	6.70884e+08	6.51918e+08	7.43693e+08	7.35621e+08	7.00131e+08				0.999999	S(5): 100.0; S(7): 0.0	0	0.005872	244.013	High	14.53	1.61914	High	21.07	0.359158	High	15.05	1.43643	High	36.58	0.0100992	High	29.98	0.0461621	High	32.51	0.0258643	High	50.52	0.000402325	High	35.27	0.0134765	High
GHTITLSPNK	26	1	1	LOC_Os01g65330.1	expressed protein	S7(Phospho)	1147.55	1.01975e+08	0	0	155402559	1.50523e+08						1.62476e+08		0.999884	T(3): 0.0; T(5): 0.0; S(7): 100.0	0	0.007264	219.286	High	26.63	0.210643	High	28.48	0.137578	High	19.08	1.2001	High	29.9		High	22.51		High	22.11		High	38.26	0.0144726	High	35.79	0.0274047	High
GIDSPVNETK	13	1	1	LOC_Os03g53630.1	PHD finger family protein, putative, expressed	S4(Phospho)	1139.5	0	1.53254e+08	6.68369e+07			8.85118e+07	1.62354e+08	1.47048e+08	1.5036e+08		9.74665e+07	1.03044e+08	1	S(4): 100.0; T(9): 0.0	0	0.004008	275.648	High	35.12	0.0255162	High	43.45	0.00374815	High	36.24	0.0205002	High	40.18	0.00824125	High	38.19	0.0130846	High	48.11	0.00133201							High
GILAADESTGTIGKR	15	7	3	LOC_Os01g67860.1 ;LOC_Os05g33380.1 ;LOC_Os06g40640.3	fructose-bisphospate aldolase isozyme, putative, expressed	T11(Phospho)	1568.77	0	3.55632e+07	7.49345e+07				3.43159e+07	3.70627e+07	3.5311e+07	7.79149e+07	6.7406e+07	7.94825e+07	0.99996	S(8): 0.0; T(9): 0.0; T(11): 100.0	0	8.942e-08	516.56	High	64.48	4.39861e-05	High	67.25	2.32348e-05	High	67.71	2.1103e-05	High	42.74	0.00651034	High	50.69	0.00106595	High	62.96	6.30005e-05
GISAASGINEWVTDGMER	10	1	1	LOC_Os03g57160.1	zinc ion binding protein, putative, expressed	S3(Phospho)	1972.87	2.31409e+07	0	3.06213e+07	37915075		3.15075e+07			4.22471e+07	4.82224e+07		4.36414e+07	1	S(3): 100.0; S(6): 0.0; T(13): 0.0	0	1.749e-07	357.02													High	4.16		High	48.18	0.00239562	High	72.08	9.10578e-06				High
GISTDSASVNCLLGLEDDSSTHSR	20	1	1	LOC_Os01g04650.1	PB1 domain containing protein, expressed	S6(Phospho); C11(Carbamidomethyl)	2601.11	0	0	5.13043e+07		4.23502e+07					5.1312e+07	5.8247e+07	4.4354e+07	0.49996	S(3): 0.0; T(4): 0.0; S(6): 50.0; S(8): 50.0; S(19): 0.0; S(20): 0.0; T(21): 0.0; S(23): 0.0	0	1.268e-10	493.488	High	94.18	8.08194e-08	High	50.16	0.00200814	High	82.95	1.07254e-06													High	61.89	0.0001348
GISVGAATNMLVAGGER	8	1	1	LOC_Os04g55040.1	vacuolar ATP synthase subunit D 1, putative, expressed	S3(Phospho)	1682.81	2.50926e+07	0	8.64506e+06	1.60418e+07	2.86185e+07	3.06174e+07				1.94679e+07		6.4673e+06	1	S(3): 100.0; T(8): 0.0	0	3.232e-08	343.389																			High	83.65	5.22138e-07	High	83.83	5.00526e-07	High
GKSLPAESGSADAEQAK	16	1	1	LOC_Os02g02290.1	SNF2 family N-terminal domain containing protein, expressed	S3(Phospho)	1725.78	0	0	1.37743e+07				4.34354e+07			1.93727e+07	2.19503e+07		1	S(3): 100.0; S(8): 0.0; S(10): 0.0	0	1.022e-15	251.832	High	24.02	0.714886	High	11.09	14.1369				High	45.35	0.00530242	High	25.37		High	23.28		High	27.41		High	18.81		High
GLAYDISDDQQDITR	9	2	1	LOC_Os11g47970.1	AAA-type ATPase family protein, putative, expressed	S7(Phospho)	1789.77	0	0	7.47944e+07					4.15713e+07		7.86214e+07	7.47465e+07	7.10152e+07	1	Y(4): 0.0; S(7): 100.0; T(14): 0.0	0	3.816e-16	422.006	High	75.83	3.57605e-06	High	63.86	5.6307e-05	High	59.14	0.000165234				High	65.92	3.51806e-05
GLDIDTIQQNYTV	31	3	1	LOC_Os04g56160.1	plasma membrane ATPase, putative, expressed	T12(Phospho)	1559.7	6.28487e+08	1.61906e+08	4.98228e+08	5.40398e+08	6.32723e+08	7.1234e+08	2.29161e+08	2.56557e+08		8.35838e+08	6.58845e+08		1	T(6): 0.0; Y(11): 0.0; T(12): 100.0	0	0.000132	321.865	High	45.02	0.00611293	High	34.19	0.07366	High	33.57	0.0852051	High	36.06	0.0481487	High	43.42	0.00884952	High	33.8		High	52.5	0.00108813	High	42.55	0.0107567	High
GLDIETIQQSYTV	14	3	2	LOC_Os12g44150.2 ;LOC_Os07g09340.1	plasma membrane ATPase, putative, expressed	T12(Phospho)	1546.71	1.70558e+07	0	0		3.74953e+07	1.36722e+07							0.999997	T(6): 0.0; S(10): 0.0; Y(11): 0.0; T(12): 100.0	0	0.001554	247.231																			High	32.04		High	37.56	0.0216166	High
GLGNEASSSSSR	18	1	1	LOC_Os02g44980.1	transmembrane amino acid transporter protein, putative, expressed	S9(Phospho)	1231.5	0	2.151e+08	6.5489e+07				2.29084e+08	2.04165e+08	2.12051e+08		9.86051e+07	9.7862e+07	0.978372	S(7): 1.1; S(8): 1.1; S(9): 97.8; S(10): 0.0; S(11): 0.0	0	0.0001793	274.064	High	37.34	0.00947415	High	11.51	3.47508	High	28.59	0.0710461	High	41.28	0.00377579	High	42.8	0.00267652	High	36.81	0.0106309	High	16.46		High	14.78
GLLASPDGSTVYETSR	11	3	1	LOC_Os02g07230.1	porphobilinogen deaminase, chloroplast precursor, putative, expressed	S9(Phospho)	1732.78	1.86153e+07	0	0		2.64833e+07	2.93627e+07		3.46453e+07			2.60396e+07		0.992183	S(5): 0.0; S(9): 99.2; T(10): 0.8; Y(12): 0.0; T(14): 0.0; S(15): 0.0	0	5.508e-06	426.909				High	46.72	0.00287512	High	57.36	0.000248116				High	39.44	0.0155798							High	53.17	0.000652557	High
GLNVVSPK	34	1	1	LOC_Os02g03840.2	expressed protein	S6(Phospho)	893.452	0	0	6.02374e+08					8.62566e+08		8.69794e+08	9.37328e+08		1	S(6): 100.0	0	0.003632	226.818	High	30.93	0.0622782	High	23.66	0.332151	High	20.38	0.706864	High	21.68		High	32.83	0.039715	High	13.06		High	21.05		High	31.53		High
GLTPPSTASGELGEVTSSTSK	14	1	1	LOC_Os05g51070.1	inactive receptor kinase At2g26730 precursor, putative, expressed	S9(Phospho)	2085.96	4.35523e+07	0	3.77739e+07	6.44802e+07	1.18589e+07	5.43179e+07					4.86563e+07	6.46654e+07	0.999998	T(3): 0.0; S(6): 0.0; T(7): 0.0; S(9): 100.0; T(16): 0.0; S(17): 0.0; S(18): 0.0; T(19): 0.0; S(20): 0.0	0	2.993e-07	454.077										High	38.38	0.022181	High	23.87					High	41.73	0.0102494	High	69.4	1.7538e-05	High
GNLADQEMASASSPGR	19	1	1	LOC_Os05g43280.1	MATH domain containing protein, expressed	S13(Phospho)	1670.68	1.06331e+08	2.99873e+07	3.54754e+07	107527421	1.00523e+08	1.10941e+08	5.18889e+07	3.8073e+07		3.89939e+07	3.3034e+07	3.43983e+07	0.99995	S(10): 0.0; S(12): 0.0; S(13): 100.0	0	4.788e-08	472.942	High	79.57	1.68869e-06	High	56.33	0.000350494	High	64.54	5.43337e-05	High	60.26	0.000141849	High	66.27	3.60209e-05				High	50.65	0.00136769	High	63.22	7.34895e-05	High
GNLSTANEGSPNQDGDK	4	2	1	LOC_Os03g53720.2	SRPK4, putative, expressed	S10(Phospho)	1783.72	0	1.8853e+07	0					2.29356e+07	3.36235e+07				1	S(4): 0.0; T(5): 0.0; S(10): 100.0	0	3.569e-05	353.414				High	28.66	0.143292							High	55.28	0.000297817	High	41.18	0.00764746
GNLSTANEGSPNQDGDKK	22	2	1	LOC_Os03g53720.2	SRPK4, putative, expressed	S10(Phospho)	1911.81	0	8.62309e+07	3.60223e+07	3.74492e+07			9.14373e+07	8.14386e+07	8.58168e+07	5.05056e+07		5.75614e+07	1	S(4): 0.0; T(5): 0.0; S(10): 100.0	0	4.02e-06	470.464	High	28.23	0.21307	High	19.25	1.68292	High	2.96	69.4244	High	55.96	0.000340595	High	53.98	0.000544125	High	56.32	0.000317584	High	42.68	0.00764217	High	10.55		High
GNLSTANEGSPNQDGDKKEEGEGSR	9	2	1	LOC_Os03g53720.2	SRPK4, putative, expressed	S10(Phospho)	2656.11	0	3.18715e+07	0			3.10965e+07	4.65762e+07		4.90384e+07				1	S(4): 0.0; T(5): 0.0; S(10): 100.0; S(24): 0.0	0	1.637e-05	317.538										High	37.44	0.0281181	High	30.96		High	42.55	0.00866377	High	24.36					High
GPFCGSPDINSR	15	1	1	LOC_Os06g42490.1	expressed protein	C4(Carbamidomethyl); S6(Phospho)	1386.55	0	3.03026e+07	3.7281e+07	5.26505e+07				2.56336e+07	6.52743e+07		5.2454e+07	5.93889e+07	1	S(6): 100.0; S(11): 0.0	0	0.001215	303	High	27.11	0.137148	High	28.33	0.0991525	High	25.5	0.193341	High	25.71		High	31.9	0.0455186	High	32.18	0.0413448	High	31.93	0.0440511	High	31.23		High
GPPSPPSHPNPIDPFAAAAAAAAEAEGEAAPPPR	11	1	1	LOC_Os05g23840.1	expressed protein	S7(Phospho)	3308.58	2.05159e+07	0	0	3.00065e+07	6.36444e+06	2.51767e+07							0.980212	S(4): 2.0; S(7): 98.0	0	4.675e-13	417.867																			High	70.61	1.50808e-05	High	103.09	8.34052e-09	High
GPSDGDVEMAEAETAK	2	1	1	LOC_Os03g40010.1	DEK C terminal domain containing protein, expressed	S3(Phospho)	1686.66	0	1.39489e+07	0				1.8257e+07	2.35899e+07					1	S(3): 100.0; T(14): 0.0	0	6.099e-08	447.205										High	90	6.505e-08	High	83.37	3.06071e-07
GPSGFPGGGGGGGSDSDEPQEYYTGGEK	58	1	1	LOC_Os04g39040.1	UBA and UBX domain-containing protein, putative, expressed	S14(Phospho)	2726.05	9.63139e+07	0	4.40039e+07	6.87067e+07	5.15361e+07	1.68699e+08		8.81366e+07		7.34654e+07	5.85464e+07		0.999994	S(3): 0.0; S(14): 100.0; S(16): 0.0; Y(22): 0.0; Y(23): 0.0; T(24): 0.0	0	2.222e-11	409.264	High	30.66	0.0964672	High	22.96	0.56273	High	37.06	0.0216467	High	17.24		High	62.3	7.178e-05	High	22.82		High	81.35	7.94015e-07	High	79.22	1.37206e-06	High
GPSPLEDPALVR	55	2	1	LOC_Os06g05530.3	RNA recognition motif containing protein, putative, expressed	S3(Phospho)	1330.64	0	2.92664e+07	0					8.11499e+07	6.64939e+06	7.7304e+07			1	S(3): 100.0	0	0.001116	294.004	High	34.6	0.0549231	High	27.98	0.248942	High	41.29	0.0115985	High	29.64		High	44.99	0.00493819	High	40.7	0.0131245	High	30.72		High	33.52		High
GQFMTEYVVTR	15	2	1	LOC_Os06g48590.1	CGMC_MAPKCMGC_2_SLT2y_ERK.2 - CGMC includes CDA, MAPK, GSK3, and CLKC kinases, expressed	T5(Phospho); Y7(Phospho)	1490.58	0	1.69494e+07	3.91015e+07	2.90456e+07			1.85833e+07		3.22648e+07	4.29712e+07	4.40164e+07	3.0317e+07	0.999999	T(5): 100.0; Y(7): 100.0; T(10): 0.0	0	2.425e-05	281.275										High	37.08	0.0128206	High	28.5		High	68.83	8.57514e-06	High	31.52	0.044748	High	30.48		High
GQLSFSSR	36	3	2	LOC_Os08g39630.1 ;LOC_Os09g31300.2	helix-loop-helix DNA-binding domain containing protein, expressed	S4(Phospho)	961.417	9.32022e+08	7.59388e+08	4.26404e+08	9.65373e+08	9.21744e+08	9.08948e+08	7.77822e+08	7.16081e+08	7.84262e+08		6.3428e+08	6.44931e+08	0.999999	S(4): 100.0; S(6): 0.0; S(7): 0.0	0	0.01129	189.177	High	41.95	0.00366044	High	51.35	0.000421008	High	45.74	0.00154011	High	45.68	0.00155072	High	46.22	0.00137896	High	46.01	0.00144853	High	35.38	0.0169639	High	35.52	0.0160892	High
GQSLPPPPPLPASFVPQSVGNR	3	1	1	LOC_Os01g68810.1	expressed protein	S3(Phospho)	2322.19	3.63134e+07	0	0	3.39041e+07	3.62105e+07	3.88255e+07							1	S(3): 100.0; S(13): 0.0; S(18): 0.0	0	1.834e-08	509.458																			High	48.08	0.00180881	High	49.99	0.00112258	High
GRDSDDDDFRDR	53	5	1	LOC_Os01g40340.3	SIT4 phosphatase-associated protein domain containing protein, expressed	S4(Phospho)	1548.57	1.18876e+09	2.2581e+09	3.02193e+09	1905440250	1.66083e+09		2.16786e+09	2.33119e+09	2.27524e+09	2.9544e+09	3.04939e+09	3.062e+09	1	S(4): 100.0	0	0.005143	314.494	High	35.5	0.0149938	High	34.55	0.0186074	High	33.82	0.0216606	High	33.98	0.0211171	High	40.75	0.00442153	High	32.45	0.0298932	High	35.95	0.0134799	High	32.16	0.0324744	High
GRDTDDDDEVEEK	4	1	1	LOC_Os03g49485.1	expressed protein	T4(Phospho)	1602.58	5.49338e+06	1.06099e+07	0		8.12192e+06	8.35823e+06		1.47871e+07	1.70427e+07				1	T(4): 100.0	0	1.248e-06	468.156													High	32.95	0.0190882	High	34.08	0.0144807				High	40.65	0.00323734	High
GRLPISSSPDAAEDNDNFR	37	1	1	ChrSy.fgenesh.mRNA.49	#N/A	S8(Phospho)	2140.94	2.92365e+07	0	6.035e+07	3.91122e+07		4.85975e+07	4.2863e+07			7.38535e+07	4.9939e+07	5.72573e+07	0.496228	S(6): 0.8; S(7): 49.6; S(8): 49.6	0	3.816e-16	306.114	High	38.29	0.0268113	High	42.35	0.0104895	High	38.89	0.0234421	High	39.07	0.0223169							High	41.67	0.0123321	High	25.38		High
GRPEPPSDAGAAPHAPPSPPR	50	1	1	LOC_Os06g12780.1	OsDegp10 - Putative Deg protease homologue, expressed	S18(Phospho)	2141	1.89866e+08	0	1.53486e+08	2.02618e+08	1.95853e+08	1.71126e+08				1.35425e+08	1.94888e+08	1.30145e+08	1	S(7): 0.0; S(18): 100.0	0	3.816e-16	671.72	High	43.09	0.0104956	High	19.29	2.51478	High	24.9	0.692976	High	34.48		High	31.33		High	25.03		High	50.44	0.00191935	High	47.91	0.00345541	High
GRPGSPESNVECQEK	70	3	1	LOC_Os05g38710.3	lipin, N-terminal conserved region family protein, expressed	S5(Phospho); C12(Carbamidomethyl)	1753.73	1.34142e+08	2.54669e+08	1.18803e+08	1.33153e+08	1.97499e+08	7.17735e+07	2.2158e+08	2.98673e+08	2.43754e+08	7.43156e+07	1.20179e+08	1.61915e+08	1	S(5): 100.0; S(8): 0.0	0	1.457e-06	458.847	High	36.24	0.0271792	High	44.04	0.00459937	High	39.94	0.0115687	High	42.28	0.00679113	High	36.61	0.0252214	High	35.93	0.029305	High	46.86	0.00235221	High	41.63	0.00790129	High
GRPPPQQHRPSSGGGGGGGSGDLASSAK	50	1	1	LOC_Os03g11220.1	keratin, type I cytoskeletal 9, putative, expressed	S11(Phospho)	2639.21	1.16157e+08	0	1.05135e+08	128302904	6.26656e+07	1.57503e+08		8.91629e+07		1.47085e+08	1.68319e+08		0.978478	S(11): 97.8; S(12): 2.2; S(20): 0.0; S(25): 0.0; S(26): 0.0	0	2.468e-11	345.375	High	46.98	0.00392676	High	28.59	0.271317	High	45.84	0.00512891				High	47.71	0.00332937				High	61.31	0.000144445	High	60.48	0.000172358	High
GRSPAFNALAANFENPNAR	22	1	1	LOC_Os06g44890.1	villin protein, putative, expressed	S3(Phospho)	2096.97	2.32367e+08	5.38819e+07	1.90807e+08	2.47567e+08	2.11224e+08	2.38312e+08	8.37238e+07	7.79219e+07		3.01182e+08	1.85644e+07	2.52673e+08	1	S(3): 100.0	0	3.554e-10	457.38	High	39.75	0.0198451	High	38.41	0.0269459	High	48.24	0.00278192	High	49.38	0.00215119	High	46.59	0.00410822				High	44.66	0.00642579	High	42.73	0.010032	High
GRSPTPVHGDDGAGSSSKPR	59	1	1	LOC_Os01g05420.1	IWS1 C-terminus family protein, putative, expressed	S3(Phospho); T5(Phospho)	2124.88	4.71322e+08	1.18298e+09	7.28145e+08	4.74046e+08	4.63133e+08	4.76788e+08	1.17815e+09	1.11602e+09	1.25476e+09	7.44312e+08	6.95399e+08	7.44724e+08	1	S(3): 100.0; T(5): 100.0; S(15): 0.0; S(16): 0.0; S(17): 0.0	0	2.822e-05	408.214	High	29.73	0.163133	High	46.64	0.00331225	High	38.02	0.0247054	High	51.66	0.00104193	High	39.87	0.0157495	High	48.57	0.00217667	High	52.78	0.000807716	High	39.32	0.0182851	High
GRSPTPVHGDDGAGSSSKPR	19	1	1	LOC_Os01g05420.1	IWS1 C-terminus family protein, putative, expressed	S3(Phospho)	2044.92	6.2023e+07	0	0	9.13438e+07		9.47252e+07			2.56002e+08	1.29196e+08			0.999783	S(3): 100.0; T(5): 0.0; S(15): 0.0; S(16): 0.0; S(17): 0.0	0	1.526e-09	364.672	High	24.94	0.602298	High	19.82	1.95487	High	9.28	22.1605	High	32.65		High	26.78		High	37.19	0.0363159	High	42.34	0.0109425	High	27.93		High
GRSSPSLPPPPPGPPPQVPHGSK	349	2	1	LOC_Os08g40560.2	ZOS8-11 - C2H2 zinc finger protein, expressed	S3(Phospho)	2350.18	1.05972e+08	4.26925e+07	5.69708e+07	99060840	1.11731e+08	1.07125e+08	2.4028e+07	6.34849e+07	4.05646e+07	1.06263e+08	4.58843e+07	1.87648e+07	0.333333	S(3): 33.3; S(4): 33.3; S(6): 33.3; S(22): 0.0	0	2.209e-08	392.269	High	48.99	0.00186246	High	40.09	0.0144083	High	40.11	0.0143323	High	41.02	0.011536	High	44.37	0.0053907	High	38.61	0.0241838	High	48.07	0.00228396	High	44.34	0.00523848	High
GSAAAADAPHAASMK	13	1	1	LOC_Os02g46090.1	CAMK_CAMK_like.15 - CAMK includes calcium/calmodulin depedent protein kinases, expressed	S13(Phospho); M14(Oxidation)	1451.6	0	2.5388e+07	1.25053e+07		1.92258e+07		2.42502e+07	2.21688e+07	2.9745e+07	1.2209e+07		2.53068e+07	1	S(2): 0.0; S(13): 100.0	0	1.348e-05	413.821	High	31.55	0.0525931	High	24.91	0.244074				High	42.27	0.00448252	High	36.43	0.0170974	High	32.81	0.0383014	High	27.95		High	51.99	0.000483795	High
GSAAAADAPHAASMKR	24	1	1	LOC_Os02g46090.1	CAMK_CAMK_like.15 - CAMK includes calcium/calmodulin depedent protein kinases, expressed	S13(Phospho)	1591.71	2.96024e+08	0	1.88476e+08	2.67833e+08	2.59455e+08	3.60783e+08				2.77442e+08		2.87985e+08	1	S(2): 0.0; S(13): 100.0	0	4.407e-06	370.008	High	29.74	0.116256	High	29.85	0.113193	High	40.97	0.00883017	High	23.17		High	28.05		High	25.12		High	41.34	0.00822656	High	43.66	0.00506084	High
GSAAALASPSSQQVGHR	14	1	1	LOC_Os07g36940.1	eukaryotic translation initiation factor 4G, putative, expressed	S8(Phospho)	1703.79	7.69574e+07	3.15011e+07	0		1.27155e+08	1.03717e+08	4.73323e+07		4.7171e+07	3.07338e+07			1	S(2): 0.0; S(8): 100.0; S(10): 0.0; S(11): 0.0	0	2.959e-08	459.819	High	63.48	6.38116e-05	High	65.92	3.68564e-05	High	67.47	2.55788e-05	High	45.12	0.00435575	High	24.81		High	40.2	0.0135561	High	9.81		High	36.99	0.028568	High
GSASFPHSSPLQR	37	2	1	LOC_Os12g37570.2	protein kinase family protein, putative, expressed	S4(Phospho)	1450.65	0	1.35376e+08	0	1.70379e+08				2.10587e+08	1.95542e+08		1.7342e+08		0.999903	S(2): 0.0; S(4): 100.0; S(8): 0.0; S(9): 0.0	0	0.00528	300.673	High	33.39	0.0627654	High	26.79	0.286998	High	22.86	0.708863	High	21.32		High	37.02	0.0266534	High	50.17	0.00128183	High	42.84	0.00710055	High	19.12		High
GSEHIPTPFAQPSMPVSPNEK	24	2	1	LOC_Os08g07830.2	DUF292 domain containing protein, expressed	S17(Phospho)	2330.06	2.05577e+08	0	1.60408e+08	1.68851e+08	2.33282e+08	2.14597e+08				3.0804e+08	1.73183e+08		1	S(2): 0.0; T(7): 0.0; S(13): 0.0; S(17): 100.0	0	7.756e-08	361.377	High	30.77	0.177598	High	30.37	0.176044	High	38.5	0.0270077				High	15.16		High	12.59		High	36.69	0.04544	High	44.7	0.00663118	High
GSFDATNAVK	18	1	1	LOC_Os02g49070.1	ZAC, putative, expressed	S2(Phospho)	1089.46	1.13832e+08	0	0		1.75364e+08	1.66133e+08			1.71606e+08		1.64737e+08		1	S(2): 100.0; T(6): 0.0	0	0.00192	251.527	High	16.49	1.21955	High	23.75	0.229825	High	19.7	0.581835	High	24.81		High	21.28		High	33.41	0.0247628	High	16.72		High	57.47	9.96472e-05	High
GSFIPSPR	57	3	1	LOC_Os01g68860.2	zinc finger C-x8-C-x5-C-x3-H type family protein, expressed	S6(Phospho)	940.429	7.78056e+07	0	0	8.76423e+07	7.24035e+07	7.33709e+07						5.10972e+07	1	S(2): 0.0; S(6): 100.0	0	0.008204	211.747	High	26.39	0.180707	High	35.1	0.0247687	High	24.78	0.260472	High	26.92		High	24.93		High	27.79		High	32.14	0.0478368	High	34.09	0.030552	High
GSFVDDQPVTGLDK	27	2	1	LOC_Os01g64960.1	chlorophyll A-B binding protein, putative, expressed	T10(Phospho)	1557.69	2.34883e+08	1.29308e+09	8.48507e+08	231845018	2.19624e+08	2.53181e+08	1.31119e+09	1.47758e+09	1.09048e+09	9.26891e+08	8.09297e+08	8.09335e+08	1	S(2): 0.0; T(10): 100.0	0	3.554e-05	340.677	High	48.7	0.00146565	High	55.09	0.000334986	High	46.42	0.00249469	High	42.67	0.00591585	High	47.31	0.00201293	High	42.62	0.00598435	High	44.87	0.00359235	High	38.57	0.0152061	High
GSGAGPSSLGSPLK	33	1	1	LOC_Os10g33680.1	serine/threonine-protein phosphatase 2A regulatory subunit B subunitbeta, putative, expressed	S11(Phospho)	1294.61	5.08296e+08	2.04279e+08	3.39948e+08	4.9779e+08	5.20652e+08	5.06445e+08	2.07731e+08	1.92165e+08	2.1294e+08	3.61837e+08	3.08303e+08	3.49702e+08	1	S(2): 0.0; S(7): 0.0; S(8): 0.0; S(11): 100.0	0	8.254e-05	415.032	High	41.5	0.00743697	High	37.92	0.0167167	High	41.66	0.00716797	High	44.45	0.0036287	High	51.47	0.000745644	High	47.71	0.00173077	High	56.01	0.000249984	High	49.83	0.00103004	High
GSGDWEGDAMDK	3	3	1	LOC_Os06g01680.4	expressed protein	S2(Phospho)	1347.46	0	0	9.51404e+06						1.99291e+07		1.60997e+07	1.24424e+07	1	S(2): 100.0	0	0.001766	205.696																High	29.86	0.0251477
GSGGGGGGGEFASDDGGGAR	14	1	1	LOC_Os04g38850.1	expressed protein	S2(Phospho)	1704.62	0	1.07959e+08	4.58657e+07			1.63347e+07	1.01936e+08	9.79844e+07	1.23958e+08	7.19666e+07	6.56304e+07		1	S(2): 100.0; S(13): 0.0	0	3.816e-16	396.539	High	65.1	1.51424e-05	High	76.91	9.92039e-07	High	72.68	2.71104e-06	High	122.74	2.63128e-11	High	80.63	4.29457e-07	High	95.46	1.3753e-08							High
GSHSNHEYAEGSGR	54	1	1	LOC_Os02g56270.1	ENTH domain containing protein, expressed	S4(Phospho)	1567.59	4.68174e+07	1.02978e+08	6.40291e+07	4.21205e+07	4.88516e+07	4.94802e+07	7.61045e+07	1.23572e+08	1.09256e+08	9.05866e+07	1.01501e+08		1	S(2): 0.0; S(4): 100.0; Y(8): 0.0; S(12): 0.0	0	5.395e-05	352.783	High	23.82	0.211419	High	29.18	0.0617797	High	41.77	0.00338957	High	37.72	0.0086128	High	46.09	0.00126463	High	41.2	0.00381565	High	31.45	0.0364875	High	33.74	0.02107	High
GSHSNHEYAEGSGRR	21	1	1	LOC_Os02g56270.1	ENTH domain containing protein, expressed	S12(Phospho)	1723.7	6.48985e+07	7.35368e+07	0	1.08633e+08	8.60624e+07		1.47944e+08		7.2667e+07			8.39665e+07	1	S(2): 0.0; S(4): 0.0; Y(8): 0.0; S(12): 100.0	0	1.989e-05	382.075				High	42.17	0.00600972	High	11.84	6.49399	High	56.26	0.000227247				High	34.74	0.0320629	High	44.52	0.00340645	High	33.34	0.0459739	High
GSLEVFNPSSASSFR	12	5	1	LOC_Os11g01140.3	AGC_PVPK_like_kin82y.18 - ACG kinases include homologs to PKA, PKG and PKC, expressed	S13(Phospho)	1664.74	1.97439e+07	0	0	3.47709e+07	2.44608e+07						8.90003e+07		0.498073	S(2): 0.0; S(9): 0.0; S(10): 0.4; S(12): 49.8; S(13): 49.8	0	0.0002993	335.839																			High	43.55	0.00512443	High	39.06	0.0144528	High
GSLMAGWDSPVLGDENR	21	2	1	LOC_Os03g61150.3	expressed protein	N-Term(Acetyl); S9(Phospho)	1925.81	0	1.31873e+08	2.25733e+08				9.86042e+07	1.62311e+08	1.34705e+08	2.19854e+08	2.42014e+08	2.15333e+08	1	S(2): 0.0; S(9): 100.0	0	3.475e-08	508.282	High	77.35	2.27151e-06	High	77.4	2.24642e-06	High	77.58	1.96405e-06	High	79.38	1.4274e-06	High	77.16	2.33656e-06	High	73.26	5.90787e-06
GSPASAAAASPR	11	1	1	LOC_Os01g55280.1	expressed protein	S10(Phospho)	1122.5	1.25125e+08	0	0	1.26444e+08	1.27572e+08	1.21359e+08							1	S(2): 0.0; S(5): 0.0; S(10): 100.0	0	0.0003217	400.305																			High	47.48	0.000997753	High	49.44	0.000662099	High
GSPDYHR	11	4	1	LOC_Os02g03040.4	RNA recognition motif containing protein, expressed	S2(Phospho)	911.341	0	0	2.3382e+07						5.48209e+07	1.44692e+07	3.02947e+07	2.53821e+07	1	S(2): 100.0; Y(5): 0.0	0.001	0.01511	181.756	High	30.16	0.0308907	High	18.61	0.435198	High	23.9	0.130565	High	20.65		High	23.8		High	28.55	0.0433572
GSPMPVSSPWSGGALVENNDSSASR	14	2	1	LOC_Os07g30820.2	zinc finger family protein, putative, expressed	S2(Phospho)	2569.11	7.18955e+07	0	3.13327e+07	8.179e+07	6.70064e+07	6.68901e+07					4.51802e+07	4.88178e+07	1	S(2): 100.0; S(7): 0.0; S(8): 0.0; S(11): 0.0; S(21): 0.0; S(22): 0.0; S(24): 0.0	0	5.539e-11	487.745	High	62.45	0.000112519	High	75.12	6.12451e-06	High	40	0.019805	High	42.25	0.0112253							High	44.52	0.00698596	High	75.31	5.87559e-06	High
GSQLPVQYDSAGAGTSPTR	31	1	1	LOC_Os02g18820.1	WD domain, G-beta repeat domain containing protein, expressed	S16(Phospho)	1971.89	0	9.11341e+07	1.05742e+08		9.39899e+07		9.30724e+07	8.80891e+07	9.22408e+07	1.17508e+08	9.81528e+07	1.01564e+08	0.990177	S(2): 0.0; Y(8): 0.0; S(10): 0.0; T(15): 0.0; S(16): 99.0; T(18): 1.0	0	3.816e-16	534.064	High	45.41	0.00541526	High	31.39	0.138069	High	18.26	2.82586	High	42.37	0.0109657	High	48.76	0.00252121	High	45.75	0.00503675	High	33.82		High	40.09	0.0184487	High
GSSDFSWTLPDHPK	24	2	1	LOC_Os05g40420.3	2,3-bisphosphoglycerate-independent phosphoglycerate mutase, putative, expressed	N-Term(Acetyl); S2(Phospho)	1695.71	3.06355e+07	0	2.9493e+07	3.17265e+07	3.02206e+07	2.99594e+07		2.41099e+07		3.51717e+07	1.96717e+07	3.36358e+07	0.5	S(2): 50.0; S(3): 50.0; S(6): 0.0; T(8): 0.0	0	2.697e-06	309.06				High	68.72	1.29443e-05	High	73.3	4.74283e-06				High	39.29	0.0118114				High	68.08	1.56452e-05	High	63.75	4.3013e-05	High
GSSFLAGNLSFSR	31	3	1	LOC_Os12g06810.2	WD domain, G-beta repeat domain containing protein, expressed	S10(Phospho)	1422.64	1.30175e+08	8.09024e+07	1.96197e+08		1.87393e+08	2.03132e+08	7.2303e+07	9.12996e+07	7.91045e+07	2.18384e+08	1.8524e+08	1.84968e+08	0.98919	S(2): 0.0; S(3): 0.0; S(10): 98.9; S(12): 1.1	0	3.277e-07	289.25	High	48.66	0.00123687	High	37.3	0.0167122	High	46.15	0.00224461	High	36.03	0.0227258	High	51.56	0.000627013	High	39.7	0.00973475	High	43.18	0.00460163	High	71.44	6.79392e-06	High
GSSIGGAGEDDSDGEVDGAPR	21	1	1	LOC_Os12g21710.1	nnrU, putative, expressed	S12(Phospho)	2027.78	5.51503e+07	2.76631e+08	1.6476e+08	5.34176e+07	5.13753e+07	6.06582e+07	2.62779e+08	2.57838e+08	3.09277e+08	1.7339e+08	1.50323e+08	1.70568e+08	1	S(2): 0.0; S(3): 0.0; S(12): 100.0	0	1.03e-09	510.734	High	77.96	1.50678e-06	High	91.97	6.02929e-08	High	55.1	0.000292651	High	81.28	7.03772e-07	High	63.73	4.03308e-05	High	76.35	2.21311e-06	High	79.55	1.07313e-06	High	83.88	3.87774e-07	High
GSSKETDPLSGAPVAHPVSSESR	78	1	1	LOC_Os06g48530.1	ZOS6-09 - C2H2 zinc finger protein, expressed	S3(Phospho)	2375.09	2.01121e+09	1.31138e+09	2.68432e+09	1814755181	1.99396e+09	2.22492e+09	9.18767e+08	1.67626e+09	1.3391e+09	2.39356e+09	2.63629e+09	3.02311e+09	0.987862	S(2): 1.2; S(3): 98.8; T(6): 0.0; S(10): 0.0; S(19): 0.0; S(20): 0.0; S(22): 0.0	0	1.114e-08	453.044	High	58.18	0.000340223	High	52.17	0.00135151	High	54.54	0.000787144	High	56.62	0.000485194	High	53.59	0.000979612	High	59.57	0.000245989	High	70.07	2.19877e-05	High	62.91	0.000113568	High
GSSPNADHIYSEAISELTHGK	24	1	1	LOC_Os03g14590.1	calcium-binding EF hand family protein, putative, expressed	S3(Phospho)	2293.03	3.22e+07	0	6.2956e+07	4.92844e+07	4.73154e+07					7.28123e+07	5.36406e+07	6.24152e+07	0.5	S(2): 50.0; S(3): 50.0; Y(10): 0.0; S(11): 0.0; S(15): 0.0; T(18): 0.0	0	6.009e-06	255.045	High	39.72	0.0177482	High	47.18	0.00317958	High	36.31	0.039234										High	37.2	0.0321546	High	41.36	0.0123453	High
GSSSFGLHIGSSDR	17	3	1	LOC_Os06g01680.4	expressed protein	S4(Phospho)	1486.64	6.19738e+07	0	4.05193e+07	5.34572e+07	6.03611e+07	7.2103e+07	3.9888e+07			4.65097e+07	3.31604e+07	4.18877e+07	0.988167	S(2): 1.2; S(3): 0.0; S(4): 98.8; S(11): 0.0; S(12): 0.0	0	2.954e-05	283.943	High	35.1	0.0258658	High	43.86	0.00342282	High	40.57	0.00744135	High	48.62	0.00115488							High	34.79	0.02768	High	49.55	0.000930598	High
GTHLDFGQAVSPVFPYSSQTR	7	3	1	LOC_Os10g41030.3	agenet domain containing protein, putative, expressed	S11(Phospho)	2374.09	9.61133e+07	0	0	1.10609e+08	9.05508e+07	8.71797e+07					4.15539e+07		1	T(2): 0.0; S(11): 100.0; Y(16): 0.0; S(17): 0.0; S(18): 0.0; T(20): 0.0	0	8.582e-08	421.697				High	44.85	0.00551733													High	51.5	0.00115395	High	41.84	0.0111223	High
GTSAEELESHVEDK	10	1	1	LOC_Os06g34710.1	expressed protein	S3(Phospho)	1610.66	3.93417e+07	0	3.33706e+07		5.86573e+07	5.93678e+07		7.70159e+07		4.83453e+07		5.17666e+07	0.999999	T(2): 0.0; S(3): 100.0; S(9): 0.0	0	2.53e-06	329.195	High	46.15	0.00188912				High	45.63	0.00215266				High	50.59	0.000686592							High	38.42	0.0114816	High
GTSTVSQLFK	16	1	1	LOC_Os01g55040.1	1,3-beta-glucan synthase component, putative, expressed	S3(Phospho)	1147.54	7.20104e+07	1.68385e+08	1.09011e+08	7.44366e+07	6.6023e+07	7.55716e+07	1.82645e+08	1.57522e+08	1.64988e+08	1.08858e+08	1.06884e+08	1.11292e+08	0.991813	T(2): 0.0; S(3): 99.2; T(4): 0.8; S(6): 0.0	0	0.001753	201.627	High	47.62	0.00206021	High	57.17	0.000225156	High	42.85	0.00608812	High	45.52	0.00327394	High	41.28	0.00873943	High	44.56	0.0041346	High	44.52	0.00357245	High	41.72	0.00688455	High
GTTSAGSSPLPEIDSK	38	1	1	LOC_Os02g50840.1	BAH domain containing protein, putative, expressed	S4(Phospho)	1626.73	0	4.02595e+07	4.16559e+07			4.93394e+07	7.76013e+07	4.09006e+07	2.2767e+06	5.37293e+07	7.44963e+06	6.37889e+07	0.984344	T(2): 0.0; T(3): 1.5; S(4): 98.4; S(7): 0.0; S(8): 0.0; S(15): 0.0	0	1.051e-05	250.05	High	46.7	0.00274942	High	38.61	0.0168915	High	35.66	0.0367942	High	58.74	0.000180908	High	45.02	0.00426363	High	44.03	0.0051536				High	30.61		High
GTVLIHSAEQLENYAK	4	1	1	LOC_Os03g59020.1	T-complex protein, putative, expressed	S7(Phospho)	1852.89	7.42334e+06	0	0		1.26742e+07	9.59578e+06					1.82718e+07		1	T(2): 0.0; S(7): 100.0; Y(14): 0.0	0	6.026e-08	448.886																						High	48.56	0.00209113	High
GVEPSGPDAGSPTFSVR	5	1	1	LOC_Os03g08360.1	3-ketoacyl-CoA synthase 10, putative, expressed	S11(Phospho)	1739.77	2.396e+07	1.15702e+07	0	42712918	2.91672e+07		1.79502e+07		1.67604e+07				0.991593	S(5): 0.0; S(11): 99.2; T(13): 0.8; S(15): 0.0	0	4.5e-05	450.979										High	37.76	0.022796	High	30.62		High	38.82	0.0184233	High	39.73	0.0143979	High	43.19	0.00668029
GVGEESVRPGK	19	1	1	LOC_Os02g09960.1	LYK8, putative, expressed	S6(Phospho)	1194.56	0	3.00731e+08	1.02623e+08	9.38322e+07			3.04981e+08	2.85235e+08	3.11977e+08	1.04352e+08	9.78902e+07	1.05626e+08	1	S(6): 100.0	0	0.0004475	326.83	High	47.78	0.00141966	High	32.01	0.0520287	High	33.44	0.0390624	High	56.09	0.000211592	High	48.59	0.00119609	High	51.27	0.000644559	High	54.56	0.000302178				High
GVGMGVGDPSSPSAR	32	1	1	LOC_Os06g08280.1	protein kinase domain containing protein, expressed	S11(Phospho)	1453.62	0	2.19707e+08	2.05409e+08			3.07236e+08	2.23983e+08	2.48078e+08	1.87059e+08	3.03892e+08		3.12334e+08	0.992372	S(10): 0.0; S(11): 99.2; S(13): 0.8	0	5.859e-05	443.91	High	45.76	0.00238915	High	47.63	0.00154549	High	33.93	0.0375446	High	49.8	0.000943986	High	40.04	0.00891749	High	34.17	0.0348562	High	29.89					High
GVLGLPGSFK	15	1	1	LOC_Os06g40630.1	SFT2, putative, expressed	S8(Phospho)	1054.54	3.92113e+07	8.26242e+07	0	5.88562e+07	5.87776e+07		1.22779e+08	1.25093e+08			6.19141e+07		1	S(8): 100.0	0	0.0004807	301.5	High	26.07	0.263115	High	36.3	0.0249543	High	34.39	0.0382111	High	33.96	0.0423889	High	35.21	0.0321488	High	25.02		High	36.75	0.0221811	High	36.74	0.0223487	High
GVNSELSPNSAPR	23	2	1	LOC_Os05g30980.2	RNA recognition motif containing protein, putative, expressed	S7(Phospho)	1407.63	1.75362e+08	4.27303e+07	1.04444e+08	176812014	1.78025e+08	1.71249e+08	5.92587e+07	4.55937e+07	2.33386e+07	1.09209e+08	1.02233e+08	1.01889e+08	0.999948	S(4): 0.0; S(7): 100.0; S(10): 0.0	0	3.494e-06	434.226	High	83.5	4.3373e-07	High	64.31	3.61043e-05	High	72.67	5.732e-06	High	65.73	2.60217e-05	High	70.43	8.90335e-06	High	65.91	2.4619e-05	High	70.16	1.01154e-05	High	67.83	1.56411e-05	High
GVSPQPAGYGGQWTA	31	1	1	LOC_Os08g01930.1	KH domain-containing protein, putative, expressed	S3(Phospho)	1555.66	1.2434e+09	0	1.06781e+09	1.20061e+09	1.21315e+09	1.31646e+09				1.22863e+09	1.04068e+09	9.34123e+08	1	S(3): 100.0; Y(9): 0.0; T(14): 0.0	0	2.831e-05	361.08	High	61.44	7.00567e-05	High	70.11	9.29653e-06	High	59.29	0.000112402										High	58.77	0.000126501	High	59.28	0.000112071	High
GVVSEEDHDSNPGHAR	34	1	1	LOC_Os06g43560.1	phox domain-containing protein, putative, expressed	S10(Phospho)	1785.72	5.54646e+07	0	5.12999e+07	6.20379e+07	4.62808e+07	5.8075e+07				7.88947e+07	7.50051e+07		1	S(4): 0.0; S(10): 100.0	0	4.117e-09	405.646	High	12.31	5.44309	High	14.55	3.21639	High	24.47	0.325476	High	30.32		High	28.87		High	24.12		High	42.31	0.00546071	High	56.49	0.000214852	High
HAAGGGETPPAR	23	1	1	LOC_Os08g41470.2	proteophosphoglycan ppg4, putative, expressed	T8(Phospho)	1200.52	1.22378e+08	3.1795e+08	1.63732e+08	1.92624e+08	1.74509e+08		3.25943e+08	2.96129e+08	3.31777e+08	2.45515e+08	2.4568e+08		1	T(8): 100.0	0	0.0007465	323.261	High	25.05	0.209604				High	38.08	0.0104327	High	31.96	0.0464542	High	32.63	0.0348194	High	40.37	0.00667169	High	33.84	0.0263524	High	33.26	0.0303064	High
HADHLAPGSPSPAASPSELGDDESWSR	9	1	1	LOC_Os03g44310.1	initiation factor 2 subunit family domain containing protein, expressed	S9(Phospho)	2853.22	0	0	8.42113e+07	1.2631e+08						1.19196e+08		1.33438e+08	0.982986	S(9): 98.3; S(11): 1.7; S(15): 0.0; S(17): 0.0; S(24): 0.0; S(26): 0.0	0	2.5e-13	435.538																			High	44.06	0.00706172	High	27.04
HADHLAPGSPSPAASPSELGDDESWSR	2	1	1	LOC_Os03g44310.1	initiation factor 2 subunit family domain containing protein, expressed	S9(Phospho); S11(Phospho); S15(Phospho)	3013.14	0	2.19911e+07	0					3.26034e+07	3.33699e+07				1	S(9): 100.0; S(11): 100.0; S(15): 100.0; S(17): 0.0; S(24): 0.0; S(26): 0.0	0	6.454e-07	414.566													High	46.76	0.00210863	High	48.91	0.00123966
HAETVDMASDLEK	9	1	1	LOC_Os03g16369.2	retrotransposon protein, putative, unclassified, expressed	S9(Phospho)	1525.63	0	2.82776e+08	0				2.75532e+08	286461252	2.86334e+08			1.91754e+08	1	T(4): 0.0; S(9): 100.0	0	9.977e-06	452.134	High	48.57	0.00106679	High	46.01	0.00198484	High	53.24	0.0003756	High	67.6	1.35114e-05	High	73.44	3.47599e-06	High	76.17	1.90218e-06	High	27.07
HDDDEHHLHNTQLLEGESSPVK	13	1	1	LOC_Os01g09570.1	6-phosphofructokinase, putative, expressed	S18(Phospho)	2617.14	7.44749e+07	0	0	1.081e+08	5.47708e+07	6.05543e+07							0.0120168	T(11): 0.0; S(18): 1.2; S(19): 98.8	0	7.266e-11	406.944																			High	39.32	0.02891	High	40.18	0.0240186	High
HDHAIQNLEPSSSGK	86	3	1	LOC_Os10g41030.3	agenet domain containing protein, putative, expressed	S12(Phospho)	1699.75	0	0	2.43913e+08			2.77335e+08			3.36781e+08	2.51202e+08	2.25501e+08	2.55035e+08	0.0106281	S(11): 0.0; S(12): 1.1; S(13): 98.9	0	2.569e-05	370.933	High	19.03	1.67722	High	32.47	0.075961	High	20.46	1.13067	High	33.25		High	20.76		High	39.73	0.0140999	High	30.34		High	31.49		High
HDLYEQTNRSPTPK	15	1	1	LOC_Os03g10590.1	splicing factor, putative, expressed	S10(Phospho); T12(Phospho)	1845.76	0	0	4.86194e+07								7.19552e+07	7.3903e+07	1	Y(4): 0.0; T(7): 0.0; S(10): 100.0; T(12): 100.0	0	3.816e-16	410.034	High	33.59	0.0527433				High	16.61	2.66075	High	29.23		High	32.61					High	31.12		High	29.98		High
HDPFAAGEATPDPSVR	20	1	1	LOC_Os02g05310.4	splicing factor 3B subunit 1, putative, expressed	T10(Phospho)	1746.76	1.27428e+08	2.88789e+07	1.33472e+08	1.10562e+08	1.20856e+08	1.50866e+08		5.33377e+07	3.3299e+07	1.24121e+08	1.38629e+08	1.37666e+08	1	T(10): 100.0; S(14): 0.0	0	1.835e-06	369.125	High	19.32	1.58584	High	30.81	0.112445	High	33.46	0.0618746	High	31.54		High	46.28	0.00331591	High	40.7	0.0117117	High	40.82	0.0114753	High	72.13	8.50555e-06	High
HDSPSSQSFTTR	40	1	1	LOC_Os07g39470.1	gibberellin response modulator protein, putative, expressed	S8(Phospho)	1429.58	0	9.35801e+07	0			1.32044e+08	1.75742e+08		1.04999e+08				0.991472	S(3): 0.0; S(5): 0.0; S(6): 0.8; S(8): 99.1; T(10): 0.0; T(11): 0.0	0	0.0001871	322.966	High	32.93	0.0461454	High	37	0.0186657	High	19.71	0.94451	High	32.7	0.047581	High	27.18		High	38.34	0.0129701	High	24.78					High
HDTDDNNNAAAADSPK	21	4	1	LOC_Os04g49510.1	CAMK_CAMK_like.27 - CAMK includes calcium/calmodulin depedent protein kinases, expressed	S14(Phospho)	1735.66	2.12237e+07	6.25942e+07	4.1813e+07	3.12767e+07	3.23945e+07		6.90481e+07	5.56015e+07	6.31331e+07	4.04802e+07	3.84384e+07	4.65204e+07	1	T(3): 0.0; S(14): 100.0	0	7.202e-11	695.937	High	86.52	1.44291e-07	High	51.23	0.000483654	High	88.63	9.12322e-08	High	84.05	2.53249e-07	High	96.96	1.29281e-08	High	67.14	1.27896e-05	High	93.09	3.14917e-08	High	78.16	9.92918e-07	High
HDTLDSPK	38	2	1	LOC_Os08g29500.1	histone-like transcription factor and archaeal histone, putative, expressed	S6(Phospho)	992.41	1.48354e+08	0	2.82736e+08		2.31123e+08	2.13939e+08			4.22813e+08	4.0375e+08	4.44458e+08		1	T(3): 0.0; S(6): 100.0	0	0.00151	255.821	High	42.96	0.00422111	High	31.13	0.064409	High	36.7	0.0163768				High	30.54		High	36.68	0.0178699	High	29.82		High	41.99	0.00498024	High
HFAPYLQSDPATTTSS	43	1	1	LOC_Os04g58900.1	hydrolase, NUDIX family, domain containing protein, expressed	S15(Phospho)	1802.77	1.82115e+08	0	1.14658e+08	1.78067e+08	1.74041e+08	1.94237e+08				1.30639e+08	1.36481e+08	7.68535e+07	0.499975	Y(5): 0.0; S(8): 0.0; T(12): 0.0; T(13): 0.0; T(14): 0.0; S(15): 50.0; S(16): 50.0	0	2.342e-06	346.776	High	55.38	0.00042533	High	51.98	0.000943198	High	61.63	0.000101343										High	75.47	4.22992e-06	High	64.31	5.4731e-05	High
HGQLMVEHGGASSGGGAAMSSHK	36	3	1	LOC_Os03g52239.1	homeobox domain containing protein, expressed	S12(Phospho)	2272.96	0	0	9.61656e+07	1.39634e+08						1.54764e+08	1.33733e+08		0.983311	S(12): 98.3; S(13): 1.7; S(20): 0.0; S(21): 0.0	0	3.816e-16	360.876	High	16.77	3.32081							High	19.58		High	16.81		High	6.63		High	38.47	0.021911	High	29.61		High
HHADSDVEMDDVKPLDDSGR	56	3	1	LOC_Os06g38470.1	histone deacetylase 19, putative, expressed	S5(Phospho)	2317.94	8.49155e+08	4.12182e+08	5.67188e+08	8.5657e+08	8.40913e+08	8.49981e+08	4.80082e+08	4.73088e+08	2.83377e+08	5.55428e+08	5.73768e+08	5.72369e+08	1	S(5): 100.0; S(18): 0.0	0	4.138e-11	616.006	High	60.92	0.000146649	High	54.81	0.000598795	High	57.23	0.000343082	High	58.36	0.000262587	High	47.06	0.00363173	High	48.28	0.00270069	High	62.32	0.000107058	High	51.73	0.00123912	High
HHIIMDPSASPR	14	1	1	LOC_Os04g56530.1	STE_MEKK_ste11_MAP3K.1 - STE kinases include homologs to sterile 7, sterile 11 and sterile 20 from yeast, expressed	S10(Phospho)	1440.65	3.31188e+07	0	0	4.79636e+07	5.13929e+07								0.989301	S(8): 1.1; S(10): 98.9	0	6.535e-05	260.805	High	35.42	0.0314638	High	38.57	0.0152339	High	37.47	0.0195892										High	35.82	0.0295593	High	42.15	0.0069731	High
HIDATLGSGNLR	18	3	1	LOC_Os03g38020.1	mps one binder kinase activator-like 1A, putative, expressed	T5(Phospho)	1333.63	2.28933e+08	0	0	2.32354e+08	2.20306e+08	2.3414e+08			1.78473e+08			2.47097e+08	1	T(5): 100.0; S(8): 0.0	0	0.0002159	346.902	High	55.69	0.000330743	High	37.61	0.020953	High	39.87	0.0124213	High	29.61		High	31.17		High	52.47	0.0006843	High	37.49	0.0212994	High	39.36	0.0138474	High
HLIPQQQAVAPGTGSPTTSQTNSPR	27	3	1	LOC_Os04g59550.4	phosphate/phosphate translocator, putative, expressed	T21(Phospho)	2653.28	3.59108e+08	8.75573e+07	1.31705e+08	3.43124e+08	3.70478e+08	3.63721e+08	9.82272e+07	8.342e+07	8.10249e+07	1.45292e+08	1.1014e+08	1.39682e+08	0.00819719	T(13): 0.0; S(15): 0.0; T(17): 0.0; T(18): 0.0; S(19): 0.0; T(21): 0.8; S(23): 99.2	0	2.387e-09	653.429	High	37.99	0.0334151	High	53.9	0.000760375	High	44.66	0.00639331	High	45.08	0.00580397	High	56.56	0.000401194	High	50.92	0.00150209	High	60.2	0.000177294	High	45.77	0.00487986	High
HLSSFSSFDNPR	33	1	1	LOC_Os01g43420.1	expressed protein	S4(Phospho)	1473.62	6.97664e+07	3.02781e+07	0	1.11444e+08		9.78549e+07	3.75603e+07	5.32741e+07				7.94087e+07	0.999999	S(3): 0.0; S(4): 100.0; S(6): 0.0; S(7): 0.0	0	2.021e-05	314.259	High	42.54	0.00646893	High	28.96	0.148911	High	39.17	0.014055	High	37.81	0.0148854	High	42.53	0.00654527	High	40.68	0.00990595	High	56.41	0.000265358	High	33.34		High
HMSPPTPPAAAEESK	28	1	1	LOC_Os12g10630.1	ZF-HD protein dimerisation region containing protein, expressed	S3(Phospho)	1629.7	5.53731e+07	0	0	6.52455e+07	5.20484e+07	4.88253e+07						1.00203e+07	1	S(3): 100.0; T(6): 0.0; S(14): 0.0	0	2.105e-05	438.265							High	11.63	8.78417										High	56.02	0.000316919	High	48.83	0.00164826	High
HNACGGGGGDGESPPSPLPSR	24	1	1	LOC_Os01g72940.1	phosphatidylserine decarboxylase, putative, expressed	C4(Carbamidomethyl); S13(Phospho)	2085.84	0	5.27901e+07	0	7.27794e+07				1.35693e+08	2.26776e+07			4.12838e+07	1	S(13): 100.0; S(16): 0.0; S(20): 0.0	0	0.000234	292.568	High	12.62	6.52317				High	26.45	0.30935	High	25.53		High	49.93	0.00124236	High	39.23	0.0156353	High	34.42	0.0471459	High	32.32		High
HNAPADVPDEPIEGLSDDEGDAPAK	44	1	1	LOC_Os06g50350.1	expressed protein	S16(Phospho)	2639.12	1.10153e+09	5.01502e+08	8.57303e+08	1.36497e+09	5.40791e+08	1.39882e+09	5.55571e+08	5.28604e+08	4.20331e+08	9.23869e+08	8.74367e+08	7.73672e+08	1	S(16): 100.0	0	2.171e-11	652.502	High	78.78	2.5871e-06	High	73.59	8.56012e-06	High	75.33	5.72697e-06	High	78.04	3.05907e-06	High	87.39	3.60037e-07	High	77.25	3.65428e-06	High	89.8	2.04609e-07	High	87.68	3.33966e-07	High
HPAPNPSPPPAAAAPASSR	19	1	1	LOC_Os02g52950.1	expressed protein	S7(Phospho)	1872.88	1.41161e+08	0	0		2.31074e+08	1.9241e+08							1	S(7): 100.0; S(17): 0.0; S(18): 0.0	0	1.52e-05	486.038																			High	26.75		High	40.12	0.0130591	High
HPEYFADSPSAGMAPAAR	11	1	1	LOC_Os09g26180.1	transcription initiation factor TFIID subunit 10, putative, expressed	S8(Phospho)	1954.82	0	7.83066e+06	1.4256e+07		8.02843e+06			1.72434e+07	6.24856e+06	2.42749e+07		1.8493e+07	0.98948	Y(4): 0.0; S(8): 98.9; S(10): 1.1	0	1.889e-08	410.224	High	45.54	0.00427957	High	53.98	0.000608116							High	49.21	0.00184783	High	52.09	0.000951127				High	43.38	0.00703032	High
HPFFAVSAPASPTR	8	1	1	LOC_Os07g39220.1	BES1/BZR1 homolog protein, putative, expressed	S11(Phospho)	1564.73	6.48631e+07	0	0	6.17345e+07	6.46943e+07	6.81606e+07					2.65112e+07		0.000101093	S(7): 100.0; S(11): 0.0; T(13): 0.0	0	1.755e-13	274.544																			High	38.38	0.0175052	High	43.97	0.00478635	High
HPHDVQSVPDSPMIDK	69	1	1	LOC_Os01g04650.1	PB1 domain containing protein, expressed	S11(Phospho)	1881.82	5.30665e+08	2.34351e+08	6.63812e+08		7.84704e+08	8.07292e+08	3.78086e+08	3.24966e+08		7.31354e+08	5.77843e+08	6.82238e+08	0.999999	S(7): 0.0; S(11): 100.0	0	1.379e-05	440.566	High	33.31	0.0605957	High	29.37	0.148907	High	32.54	0.0723506	High	38.73	0.0175833	High	36.15	0.0314367	High	30.38		High	32.34		High	38.91	0.0166188	High
HPSSGSPTFSSGSPSAHWDNACLPTGVLQPSPR	102	2	1	LOC_Os12g07450.1	WD domain, G-beta repeat domain containing protein, expressed	S6(Phospho); C22(Carbamidomethyl)	3498.57	0	0	1.4996e+08				1.23873e+08			1.86479e+08	2.63401e+08		0.999204	S(3): 0.0; S(4): 0.0; S(6): 99.9; T(8): 0.0; S(10): 0.0; S(11): 0.0; S(13): 0.0; S(15): 0.0; T(25): 0.0; S(31): 0.0	0	4.893e-08	470.108	High	39.3	0.0259182	High	30.6	0.191917	High	36.75	0.0468561	High	46.25	0.00525734	High	32.77		High	31.67		High	28.51		High	34.1		High
HPSSLGGGGGGGEEEAGEASSR	12	3	1	LOC_Os04g33450.3	expressed protein	S4(Phospho)	2064.83	4.69387e+07	0	0	75666134	6.51499e+07								0.5	S(3): 50.0; S(4): 50.0; S(20): 0.0; S(21): 0.0	0	1.968e-09	386.634																			High	36.4	0.0323012	High	41.46	0.010053	High
HPWLSFPYEPISS	20	1	1	LOC_Os03g51020.1	expressed protein	S13(Phospho)	1639.72	2.83608e+07	9.34281e+07	0	5.98797e+07		2.52029e+07		1.4308e+08	1.37204e+08				0.5	S(5): 0.0; Y(8): 0.0; S(12): 50.0; S(13): 50.0	0	2.986e-12	309.294	High	27.78	0.195818	High	8.16	17.9413							High	34.61	0.0407344	High	38.98	0.0148986	High	36.74	0.0261724				High
HQNEVGMSMTDYGLDK	26	1	1	LOC_Os08g16130.1	fiber protein Fb34, putative, expressed	S8(Phospho)	1904.76	0	1.67293e+07	0			3.78547e+07	1.24556e+07	3.77323e+07			3.12274e+07		0.999886	S(8): 100.0; T(10): 0.0; Y(12): 0.0	0	7.891e-06	396.241	High	12.8	5.59707	High	15.51	2.6924	High	7.89	16.987	High	55.18	0.000290647	High	46.41	0.00220903	High	13.61		High	23.63		High	32.02		High
HQSIDAQLR	40	2	1	LOC_Os02g14770.4	phosphoenolpyruvate carboxylase, putative, expressed	S3(Phospho)	1147.53	1.07341e+09	3.43522e+08	1.32141e+09	1.09835e+09	1.04898e+09	1.07292e+09	3.5057e+08	3.08924e+08	3.71073e+08	1.50667e+09	1.14046e+09	1.31711e+09	1	S(3): 100.0	0	0.0006967	287.599	High	44.82	0.00314942	High	39.67	0.0103201	High	42.57	0.00529833	High	33.76	0.0415888	High	34.38	0.0360559	High	34.48	0.0351283	High	46.1	0.00242771	High	53.46	0.000440899	High
HRHDDSPPR	4	1	1	LOC_Os12g15420.1	nucampholin, putative, expressed	S6(Phospho)	1196.5	0	6.92085e+07	0		1.44887e+07		8.4313e+07		1.23312e+08				1	S(6): 100.0	0	0.001153	298.776				High	44.58	0.00224329				High	48.4	0.000932309				High	44.9	0.00208394				High	34.32	0.0238169
HSASFDGFAFGAGAGGPGPGLGK	7	1	1	LOC_Os07g48180.1	bZIP transcription factor domain containing protein, expressed	S4(Phospho)	2141.95	1.11966e+07	0	0		1.62129e+07	1.7377e+07							0.5	S(2): 50.0; S(4): 50.0	0	6.087e-10	493.989																						High	68.29	2.21266e-05	High
HSGSDPDMVK	11	1	1	LOC_Os03g50810.1	receptor protein kinase TMK1 precursor, putative, expressed	S2(Phospho)	1152.44	6.16782e+07	0	0	8.99558e+07		9.50788e+07					9.14615e+07		1	S(2): 100.0; S(4): 0.0	0	0.009578	279.241										High	25.59		High	18.21		High	22.75		High	30.8	0.0402158	High	25.08		High
HSLSQMLQADSNEPEIIEWGNAENPPAIVFHK	2	2	1	LOC_Os03g21270.3	expressed protein	S4(Phospho)	3681.74	2.55429e+06	0	0		1.41329e+06	6.24957e+06							0.982123	S(2): 1.8; S(4): 98.2; S(11): 0.0	0	6.289e-08	456.039																						High	51.96	0.00122169	High
HSSLVATNSIPR	24	3	1	LOC_Os07g06130.2	ethylene-insensitive protein, putative, expressed	T7(Phospho)	1361.66	0	4.95534e+07	1.99923e+07	4.48309e+07			4.78846e+07	4.8072e+07	5.27035e+07	3.29592e+07	2.70177e+07		0.5	S(2): 0.0; S(3): 0.0; T(7): 50.0; S(9): 50.0	0	1.135e-05	316.071	High	34.37	0.0495747	High	46.77	0.00284641	High	30.19	0.139511	High	36.02	0.0373302	High	39.22	0.0169997	High	40.35	0.013285	High	47.82	0.00236726	High	32.44		High
HSSSPAGLLSR	27	1	1	LOC_Os01g67480.1	helix-loop-helix DNA-binding domain containing protein, expressed	S3(Phospho)	1191.56	7.72948e+08	0	0	7.66545e+08	7.57926e+08	7.94372e+08							0.99989	S(2): 0.0; S(3): 100.0; S(4): 0.0; S(10): 0.0	0	0.0008767	250.941	High	13.15	4.07915	High	21.74	0.568732	High	15.61	2.27526										High	43.01	0.0043328	High	46.04	0.00215535	High
HSSSVDGSGFFAAAR	13	1	1	LOC_Os03g21800.2	bZIP transcription factor family protein, putative, expressed	S4(Phospho)	1575.66	2.31836e+07	0	5.18504e+06	2.43945e+07	2.27226e+07	2.24338e+07				8.62534e+06	6.92979e+06		0.999999	S(2): 0.0; S(3): 0.0; S(4): 100.0; S(8): 0.0	0	4.333e-06	333.314	High	58.78	0.000123826				High	34.2	0.0367263										High	53.42	0.00046932	High	68.79	1.16538e-05	High
HSSVADLGSEVR	8	2	1	LOC_Os11g36430.2	zinc finger, C3HC4 type domain containing protein, expressed	S3(Phospho)	1336.6	3.00273e+07	0	2.99466e+07	44171618	4.59104e+07					4.63895e+07	4.34504e+07		0.999999	S(2): 0.0; S(3): 100.0; S(9): 0.0	0	0.0008753	279.672																			High	44.37	0.0036724	High	42.06	0.00620745
HSTGQSTPVNNDR	11	2	1	LOC_Os11g36430.2	zinc finger, C3HC4 type domain containing protein, expressed	S2(Phospho)	1492.62	1.13804e+07	0	0	1.31916e+07	1.00704e+07	1.08791e+07			1.28366e+07				0.999938	S(2): 100.0; T(3): 0.0; S(6): 0.0; T(7): 0.0	0	1.972e-06	334.487				High	33.54	0.0406075	High	41.9	0.00595293							High	43.68	0.0045919	High	42.32	0.00546574	High	36.86	0.0194833	High
HTTNPVSDHVVVSPVVSPGEFQR	27	1	1	LOC_Os02g56480.1	PB1 domain containing protein, expressed	S13(Phospho); S17(Phospho)	2648.2	9.40645e+08	5.54795e+08	2.71248e+08	1.04098e+09	8.62168e+08	9.18784e+08	6.30888e+08	5.54453e+08	4.79045e+08		3.28972e+08	4.84772e+08	1	T(2): 0.0; T(3): 0.0; S(7): 0.0; S(13): 100.0; S(17): 100.0	0	3.816e-16	539.177	High	40.43	0.0162081	High	39.93	0.0179317	High	46.95	0.00361187	High	41.54	0.0123667	High	40.09	0.017239	High	43.66	0.00764185	High	38.59	0.0246967	High	45.1	0.00542965	High
HTTNPVSDHVVVSPVVSPGEFQR	19	1	1	LOC_Os02g56480.1	PB1 domain containing protein, expressed	S13(Phospho)	2568.23	1.11934e+08	0	0	1.71188e+08	1.64613e+08							1.26336e+08	1	T(2): 0.0; T(3): 0.0; S(7): 0.0; S(13): 100.0; S(17): 0.0	0	1.464e-09	457.944				High	32.76	0.0840046				High	13.18								High	49.12	0.00192326	High	36.51	0.03586	High
HTVDSPDDSQQK	21	1	1	LOC_Os03g16369.2	retrotransposon protein, putative, unclassified, expressed	S5(Phospho)	1436.57	1.96195e+07	8.8013e+07	5.90684e+07	1.99101e+07	1.96546e+07	1.92939e+07	9.0092e+07	8.12196e+07	9.27275e+07	5.69345e+07	5.97065e+07	6.05642e+07	1	T(2): 0.0; S(5): 100.0; S(9): 0.0	0	6.271e-06	419.963	High	1.77	44.0078				High	38.27	0.00971808	High	53.51	0.000293242	High	44.35	0.00239652	High	47.63	0.00119859	High	46	0.00163901	High	47.69	0.00118215	High
HVANPWTAPPIRSPEQK	51	1	1	LOC_Os03g27800.1	paramyosin, putative, expressed	S13(Phospho)	2007.99	5.09086e+08	0	2.70705e+08	5.63779e+08	4.42828e+08	5.20651e+08	3.14623e+08			1.84899e+08	3.87268e+08	2.39949e+08	1	T(7): 0.0; S(13): 100.0	0	8.542e-06	480.838	High	32.61	0.074456	High	35.27	0.0394043	High	35.93	0.0335935	High	36.62	0.0291378	High	30.4		High	32.17		High	43.07	0.00638413	High	48.34	0.00187883	High
HVESMSELPSGAGR	32	1	1	LOC_Os02g32490.1	AMP-binding enzyme, putative, expressed	S4(Phospho); M5(Oxidation)	1552.65	0	5.82023e+07	1.59081e+08				8.07578e+07		9.38492e+07	1.6011e+08	1.34235e+08	1.82899e+08	1	S(4): 100.0; S(6): 0.0; S(10): 0.0	0	3.861e-06	392.429	High	52.25	0.000580771	High	42.21	0.00585844	High	42.43	0.00534333	High	32.92	0.0493403				High	39.14	0.0113366	High	27.9		High	13.93		High
HVESMSELPSGAGR	35	1	1	LOC_Os02g32490.1	AMP-binding enzyme, putative, expressed	S4(Phospho)	1536.66	1.39908e+09	8.67004e+08	1.8608e+09	1.33987e+09	1.35921e+09	1.49815e+09	9.5087e+08	8.30748e+08	8.19394e+08	2.26684e+09	1.55197e+09	1.76357e+09	1	S(4): 100.0; S(6): 0.0; S(10): 0.0	0	7.659e-08	403.978	High	77.33	2.12111e-06	High	83.45	5.18731e-07	High	68.1	1.77804e-05	High	59.5	0.00014216	High	68.63	1.74445e-05	High	68.05	1.99369e-05	High	53.5	0.000568405	High	36.18	0.0309673	High
HVPNSSSSPPFGGSDAGLPQNR	32	1	1	LOC_Os03g11460.1	expressed protein	S8(Phospho)	2288.02	2.46633e+07	0	0	3.30905e+07	1.56917e+07	2.52075e+07							0.981836	S(5): 0.0; S(6): 0.0; S(7): 1.8; S(8): 98.2; S(14): 0.0	0	1.16e-06	315.866	High	19.25	2.63491	High	14.13	8.53871	High	11.92	14.1391	High	8.33					High	15.25		High	38.76	0.0293831	High	47.35	0.00404786	High
HVSPDPSTFSGSVHQPSK	97	1	1	LOC_Os06g46880.1	surp module family protein, putative, expressed	S3(Phospho)	1973.88	1.69501e+09	6.43333e+08	1.54471e+09	1.65535e+09	1.74664e+09	1.68305e+09	4.57191e+08	9.03337e+08	5.69472e+08	1.61842e+09	1.48405e+09	1.53166e+09	1	S(3): 100.0; S(7): 0.0; T(8): 0.0; S(10): 0.0; S(12): 0.0; S(17): 0.0	0	1.076e-06	462.872	High	64.13	5.89403e-05	High	45.14	0.00462816	High	49.62	0.00166499	High	46.39	0.00349474	High	35.17	0.0462519	High	38.46	0.021712	High	48.56	0.00212526	High	42.62	0.00826815	High
IAAATASAYSDDDDDSDEAQATRPEGEVK	5	2	1	LOC_Os01g03760.2	expressed protein	S10(Phospho)	3078.28	9.24587e+07	0	0	9.40062e+07	9.07185e+07	9.26514e+07					3.40364e+07		0.999588	T(5): 0.0; S(7): 0.0; Y(9): 0.0; S(10): 100.0; S(16): 0.0; T(22): 0.0	0	3.055e-13	418.626																			High	43.67	0.00756843	High	67.35	3.14956e-05	High
IAATSSGGGSSR	37	1	1	LOC_Os01g04650.1	PB1 domain containing protein, expressed	S6(Phospho)	1130.48	7.93436e+07	1.56822e+08	1.83708e+08	7.46167e+07	8.45858e+07	7.88283e+07	1.57667e+08	1.53643e+08	1.59157e+08	1.74352e+08	1.9572e+08	1.81052e+08	0.999999	T(4): 0.0; S(5): 0.0; S(6): 100.0; S(10): 0.0; S(11): 0.0	0	0.0005763	374.372	High	39.72	0.00806347	High	51.52	0.000534157	High	49.71	0.000808205	High	47.59	0.00132377	High	45.12	0.00232553	High	53.77	0.000320486	High	41.49	0.00541763	High	47.83	0.00118338	High
IAPEEHVLATETTVDTPPVQETELEER	3	1	1	LOC_Os02g03840.2	expressed protein	T16(Phospho)	3113.47	0	3.55149e+07	0				5.78078e+07		4.8737e+07				1	T(10): 0.0; T(12): 0.0; T(13): 0.0; T(16): 100.0; T(22): 0.0	0	2.616e-09	395.733				High	26.86	0.501248				High	55.86	0.000631553				High	73.04	1.21913e-05
IAPNTQFAGPSNRPASQEGR	55	1	1	LOC_Os07g36940.1	eukaryotic translation initiation factor 4G, putative, expressed	S16(Phospho)	2178.01	3.22665e+09	0	1.26317e+09	3.17292e+09	3.31877e+09	3.18824e+09		6.01449e+08			1.74574e+09	2.04376e+09	1	T(5): 0.0; S(11): 0.0; S(16): 100.0	0	3.816e-16	455.047	High	40	0.02034	High	27.66	0.345448	High	35.13	0.0631912	High	34.02		High	39.01	0.0258177	High	17.87		High	38.93	0.0255428	High	37.59	0.0350974	High
IASKDGIDAR	12	1	1	LOC_Os06g05700.1	cysteine synthase, putative, expressed	S3(Phospho)	1125.53	0	0	7.68444e+07			4.61973e+07			4.62034e+07	8.19549e+07	6.58394e+07	8.27389e+07	1	S(3): 100.0	0	0.008991	230.955	High	40.42	0.00917807	High	24.33	0.367502							High	30.84		High	45.69	0.00277058				High	21.46		High
IDDANAVSTDDDVHPDPK	22	1	1	LOC_Os02g55080.1	snf1-related kinase interactor 2, putative, expressed	S8(Phospho)	2003.82	3.09479e+07	0	1.95852e+07		4.87676e+07	4.40762e+07	2.00406e+07				3.5993e+07	2.27625e+07	0.990609	S(8): 99.1; T(9): 0.9	0	1.283e-07	466.726	High	45.43	0.00356304	High	26.82	0.27504	High	36.63	0.0287448	High	37.67	0.0212726				High	29.67		High	8.9		High	40.33	0.0119098	High
IDDSSDAEDNANDPYTQSGGK	28	2	1	LOC_Os03g60790.3	heat shock protein DnaJ, putative, expressed	S4(Phospho)	2278.87	0	5.51053e+07	3.98965e+07				4.98993e+07	6.03869e+07	5.50297e+07		6.82172e+07	5.14722e+07	0.987971	S(4): 98.8; S(5): 1.2; Y(15): 0.0; T(16): 0.0; S(18): 0.0	0	3.816e-16	438.6	High	90.31	9.39022e-08	High	107.36	1.85307e-09	High	95.83	2.45543e-08	High	83.83	4.05513e-07	High	94.27	3.52225e-08	High	125.76	2.65991e-11
IDGIDELAQQLGYLSSTSPK	9	2	1	LOC_Os10g28340.3	heat stress transcription factor, putative, expressed	S18(Phospho)	2215.06	1.39446e+07	0	0	2.32494e+06	2.7461e+07	1.20477e+07							0.987824	Y(13): 0.0; S(15): 0.0; S(16): 0.0; T(17): 1.2; S(18): 98.8	0	3.628e-08	395.341																			High	41.55	0.0120513	High	55.48	0.000475957	High
IDIGGSPVSAAR	6	1	1	LOC_Os03g08820.1	expressed protein	S6(Phospho)	1222.59	0	3.09408e+07	4.03022e+07				4.88515e+07	4.39709e+07		4.39354e+07	3.87466e+07	3.82246e+07	1	S(6): 100.0; S(9): 0.0	0	7.889e-05	304.997										High	34.54	0.0301639	High	44.44	0.00302189	High	23.68
IDPVDLPAIPTAQPVSGPLVPGR	12	2	1	LOC_Os06g02130.1	G-protein alpha subunit, putative, expressed	S16(Phospho)	2389.26	2.78177e+07	0	1.71641e+07		4.05467e+07	4.29063e+07				3.92786e+07		1.22136e+07	1	T(11): 0.0; S(16): 100.0	0	6.671e-06	366.78	High	20.02	0.856546	High	14.94	2.69487	High	30.4	0.0778857				High	25.13					High	29.67		High	37.07	0.0160799	High
IEASSANITR	9	1	1	LOC_Os08g26710.1	plant protein of unknown function domain containing protein, expressed	S5(Phospho)	1141.53	0	6.81656e+07	0				1.0456e+08	9.99364e+07					0.999998	S(4): 0.0; S(5): 100.0; T(9): 0.0	0	0.007636	260.252										High	38.63	0.0138391	High	45.94	0.0026105	High	29.86
IEENDDHISTEDTEETSNNTNLVK	15	1	1	LOC_Os02g03840.2	expressed protein	S9(Phospho)	2827.18	7.177e+07	0	8.14405e+07	6.25301e+07	7.43422e+07	7.84378e+07				8.44919e+07	8.32035e+07	7.6626e+07	0.999782	S(9): 100.0; T(10): 0.0; T(13): 0.0; T(16): 0.0; S(17): 0.0; T(20): 0.0	0	1.887e-07	406.265	High	41.49	0.0126056	High	37.81	0.0287359	High	38.75	0.0229299	High	45.61	0.00478683	High	53.31	0.000801487	High	28.27		High	47.3	0.00325679	High	54.89	0.000560135	High
IEHGSPLR	11	1	1	LOC_Os01g66300.1	KH domain containing protein, putative, expressed	S5(Phospho)	988.463	2.47725e+08	0	0	363900153	3.79274e+08								1	S(5): 100.0	0	0.02115	259.869				High	32.95	0.0285182				High	27.49		High	29.12					High	31.52	0.039639	High	34.75	0.0187413
IEQLGGAGSAR	5	1	1	LOC_Os04g38910.1	atypical receptor-like kinase MARK, putative, expressed	S9(Phospho)	1138.53	1.22594e+07	0	0	1.98875e+07		1.68907e+07						2.90196e+07	1	S(9): 100.0	0	0.006455	190.671																			High	37.96	0.0114448	High	6.32		High
IEQPGDDSEDDKPLASR	20	1	1	LOC_Os08g05840.1	DNA topoisomerase 1, putative, expressed	S8(Phospho)	1951.83	6.62029e+07	0	1.20186e+08	65417224	6.46998e+07	6.84918e+07				1.14031e+08	1.1848e+08	1.28047e+08	1	S(8): 100.0; S(16): 0.0	0	3.077e-08	444.952	High	6.76	31.7032	High	13.55	6.61693	High	10.29	14.0779				High	20.08					High	52.44	0.000848975	High	40.98	0.0119021	High
IETGSPDKR	46	1	1	LOC_Os08g32100.1	transposon protein, putative, CACTA, En/Spm sub-class, expressed	S5(Phospho)	1082.49	4.34689e+08	1.31367e+09	8.17569e+08	423251543	4.50163e+08	4.30652e+08	1.3013e+09	1.22238e+09	1.41733e+09	7.82391e+08	8.34719e+08	8.35597e+08	1	T(3): 0.0; S(5): 100.0	0	0.004088	375.186	High	47.39	0.0013433	High	50.83	0.000636049	High	47.37	0.0013495	High	47.43	0.00139152	High	47.76	0.00128971	High	47.87	0.00125745	High	45.49	0.00221047	High	53.03	0.000366583	High
IETGSPDKRK	12	1	1	LOC_Os08g32100.1	transposon protein, putative, CACTA, En/Spm sub-class, expressed	S5(Phospho)	1210.59	0	1.05159e+07	1.71193e+07		2.84289e+06			1.19787e+07	1.95689e+07	1.1593e+07	2.30488e+07	1.6716e+07	1	T(3): 0.0; S(5): 100.0	0	0.01061	354.843							High	21.89	0.659438	High	19.22		High	41.71	0.0069645	High	39.8	0.0109477				High	38.34	0.0153663
IEVEPLPSPVAVSLKPPPK	14	1	1	LOC_Os10g25090.1	STRUBBELIG-RECEPTOR FAMILY 6 precursor, putative, expressed	S8(Phospho)	2077.14	0	0	2.67397e+07	8.14078e+06							4.02968e+07	3.99222e+07	0.999998	S(8): 100.0; S(13): 0.0	0	3.816e-16	327.013	High	33.1	0.0245869	High	31.14	0.0393026				High	26.58		High	20.52		High	22.23		High	32.78	0.0247271	High	26.86		High
IFNVLGEPVDNLGPVDTSATFPIHR	19	3	1	LOC_Os10g21266.1	ATP synthase subunit beta, putative	S18(Phospho)	2788.39	1.44844e+08	0	2.05368e+08	1.19338e+08	1.32147e+08	1.83048e+08	1.14712e+08			1.81577e+08	2.30138e+08	2.0439e+08	0.999655	T(17): 0.0; S(18): 100.0; T(20): 0.0	0	3.816e-16	488.878	High	58.18	0.000267084	High	34.23	0.0663206	High	45.72	0.00469256	High	38.54	0.0248847	High	32.44					High	42.97	0.00791561	High	43.58	0.00617451	High
IFPGFDSLMSHSR	14	2	1	LOC_Os06g04560.2	kinesin motor domain containing protein, expressed	S12(Phospho)	1573.69	3.60756e+07	0	1.84157e+07	5.89465e+07	2.53322e+07	2.39482e+07				1.37781e+07	1.41018e+07	2.73672e+07	0.99231	S(7): 0.0; S(10): 0.8; S(12): 99.2	0	0.005313	363.128							High	30.93	0.109542										High	57.46	0.000275222	High	62.3	8.6295e-05	High
IGEDELEETNPLAIVPDSNPIPSPR	30	1	1	LOC_Os07g38170.1	remorin, putative, expressed	S23(Phospho)	2782.35	1.68973e+08	1.52545e+08	3.79318e+08	1.71988e+08	1.52593e+08	1.82336e+08	2.26579e+08	2.31056e+08		5.24724e+08	4.07069e+08	2.06161e+08	1	T(9): 0.0; S(18): 0.0; S(23): 100.0	0	7.04e-06	486.427	High	45.66	0.00510419	High	40.93	0.0155231	High	37.08	0.0387166	High	40.22	0.0183277	High	38.09	0.0300076	High	22.96		High	36.55	0.0352989	High	44.21	0.00734543	High
IGGMIEGLIWSPR	4	1	1	LOC_Os02g08364.1	protein phosphatase 2C, putative, expressed	S11(Phospho)	1508.74	0	3.29752e+06	1.11914e+07				7.51951e+06		2.37305e+06	1.79837e+07	1.55905e+07		1	S(11): 100.0	0	6.267e-07	399.99										High	44.8	0.00438583				High	46.28	0.00310513
IGPGSTSSR	42	1	1	LOC_Os08g01850.1	esterase, putative, expressed	T6(Phospho)	941.412	1.43354e+08	0	2.22127e+08		2.33969e+08	1.96094e+08				2.13836e+08	2.32716e+08	2.1983e+08	0.986313	S(5): 0.7; T(6): 98.6; S(7): 0.7; S(8): 0.0	0	0.006251	303.485	High	27.92	0.14505	High	26.12	0.211479	High	28.84	0.117359	High	26.23		High	26.79		High	22.49		High	27.93		High	32.42	0.0494323	High
IGPLGLSPK	10	2	1	LOC_Os02g47140.2	L11 domain containing ribosomal protein, putative, expressed	S7(Phospho)	961.515	3.7028e+06	0	4.70719e+06	3.70228e+06		7.40612e+06				4.03092e+06	5.72868e+06	4.36196e+06	1	S(7): 100.0	0	0.001289	310.245				High	31.13	0.0679551										High	26.28		High	34.36	0.0323198				High
IGSAPAGTSSSFSSAPR	9	1	1	LOC_Os06g35770.1	expressed protein	S11(Phospho)	1659.75	0	0	1.50705e+07	3.14093e+07							1.68989e+07	2.83125e+07	0.984526	S(3): 0.0; T(8): 0.0; S(9): 0.0; S(10): 0.0; S(11): 98.5; S(13): 1.5; S(14): 0.0	0	9.947e-05	305.865																High	12.55		High	41.4	0.00983422
IGSFTISR	3	1	1	LOC_Os03g11210.1	DUF538 domain containing protein, putative, expressed	S3(Phospho)	960.457	3.90908e+07	0	0	4.68643e+07	3.28305e+07	3.75774e+07							1	S(3): 100.0; T(5): 0.0; S(7): 0.0	0	0.005408	246.313																			High	43.76	0.00317438	High	40.44	0.00684063	High
IGSGGLGSGR	8	4	1	LOC_Os06g08840.8	RNA recognition motif containing protein, expressed	S3(Phospho)	940.427	0	0	3.2922e+07							5.25727e+07		4.61932e+07	1	S(3): 100.0; S(8): 0.0	0	0.0001742	240.443				High	24.03	0.316886	High	29.75	0.0819862													High	22.96		High
IGSVAEDLGVLQSK	10	2	1	LOC_Os08g21350.3	cig3, putative, expressed	S3(Phospho)	1495.74	0	3.75013e+07	3.56443e+07				4.01623e+07	3.35024e+07	3.88393e+07	4.01262e+07	3.4809e+07	3.19976e+07	1	S(3): 100.0; S(13): 0.0	0	8.634e-09	465.419	High	109.18	1.25733e-09	High	106.13	2.40368e-09	High	93.55	4.35388e-08	High	76.1	2.57499e-06	High	105.86	2.61104e-09	High	96.8	2.16973e-08
IISLAGLTGDGAALISPTSR	5	1	1	LOC_Os10g39910.1	expressed protein	S16(Phospho)	1993.04	3.52881e+06	0	0	8.26042e+06	2.326e+06								0.00365772	S(3): 0.0; T(8): 0.0; S(16): 0.4; T(18): 49.8; S(19): 49.8	0	6.173e-10	465.538																			High	62.92	7.1777e-05	High	69.22	1.65749e-05
IISSSSMDTR	15	1	1	LOC_Os08g01900.1	armadillo/beta-catenin repeat family protein, putative, expressed	S3(Phospho); M7(Oxidation)	1192.49	5.79209e+07	0	1.21006e+08	5.71124e+07	5.57913e+07	6.08592e+07				1.20335e+08	1.11313e+08	1.31371e+08	0.999999	S(3): 100.0; S(4): 0.0; S(5): 0.0; S(6): 0.0; T(9): 0.0	0	0.0003423	206.19				High	32.41	0.0414225	High	31.54	0.0505048	High	29.41		High	28.92		High	27.64		High	37.41	0.013108	High	39.32	0.00857243	High
IIVSDDENEDAEAPFLQK	16	3	1	LOC_Os05g51620.3	expressed protein	S4(Phospho)	2112.95	0	1.16191e+08	5.34157e+07	3.10955e+07			9.81024e+07	1.13927e+08	1.36544e+08	4.8362e+07	5.52103e+07	5.66746e+07	1	S(4): 100.0	0	1.923e-10	536.749	High	107.35	2.93419e-09	High	126.12	3.90216e-11	High	90.34	1.46796e-07	High	82.03	9.63732e-07	High	67.94	2.55343e-05	High	72.43	9.04651e-06	High	70.42	1.45524e-05				High
ILEEELADNVGSDR	7	1	1	LOC_Os03g06950.1	ubiquitin carboxyl-terminal hydrolase domain containing protein, expressed	S12(Phospho)	1639.72	0	5.70497e+07	0			4.3186e+07	7.14181e+07	4.99613e+07	4.97698e+07				1	S(12): 100.0	0	5.779e-06	372.037				High	41.72	0.00793439	High	49.7	0.00125743	High	50.47	0.00105986	High	59.88	0.000121923	High	45.1	0.00364346							High
ILHSSSVDMGNMK	24	1	1	LOC_Os02g57660.2	phosphatidylinositol-4-phosphate 5-kinase, putative, expressed	S6(Phospho)	1498.65	5.45368e+07	0	5.6059e+07		8.47057e+07	7.89048e+07					8.3043e+07	8.51341e+07	0.499976	S(4): 0.0; S(5): 50.0; S(6): 50.0	0	6.425e-07	329.079	High	46.34	0.00231112	High	30.86	0.0773592	High	18.19	1.42299	High	32.94		High	23.16		High	19.95		High	30.26		High	41.92	0.00660683	High
ILPWGDEAYAGGSANAPR	11	2	1	LOC_Os03g21040.2	stress responsive protein, putative, expressed	S13(Phospho)	1924.86	0	0	7.18966e+07	5.54239e+07					8.81366e+07	7.73768e+07	8.01442e+07	5.81688e+07	1	Y(9): 0.0; S(13): 100.0	0	2.092e-09	442.034	High	79.49	1.58232e-06	High	18.85	1.84463	High	77.58	2.52533e-06							High	77.47	2.56325e-06	High	89.33	1.6522e-07
ILPWGPEAHSSSPGAATACTIGGVPVHTVR	22	2	1	LOC_Os07g48490.4	stress responsive protein, putative, expressed	S11(Phospho); C19(Carbamidomethyl)	3105.5	5.57317e+07	0	0	8.24542e+07		8.47408e+07							0.963247	S(10): 1.8; S(11): 96.3; S(12): 1.8; T(17): 0.0; T(20): 0.0; T(28): 0.0	0	1.715e-10	495.413																			High	44.65	0.00687078	High	28.33		High
ILQQEKSDEK	10	1	1	LOC_Os04g56740.1	IQ calmodulin-binding motif family protein, putative, expressed	S7(Phospho)	1297.61	0	9.30922e+07	0			5.93541e+07	1.40404e+08	1.38873e+08					1	S(7): 100.0	0.001	0.01039	255.915				High	25	0.365559	High	38.2	0.0173908	High	44.73	0.00380595	High	38.47	0.0160581				High	24		High	21.96		High
ILSGFDNR	28	1	1	LOC_Os02g30230.1	exo70 exocyst complex subunit domain containing protein, expressed	S3(Phospho)	1001.45	1.27665e+08	0	1.3246e+08	1.29801e+08	1.19525e+08	1.33669e+08	6.22974e+07			1.30139e+08	1.28761e+08	1.38479e+08	1	S(3): 100.0	0	0.004802	256.561	High	38.71	0.0077858	High	40.97	0.00473902	High	38.31	0.00910511	High	36.33	0.0149813	High	29.32		High	30.61		High	44.62	0.00225034	High	44.35	0.00236346	High
ILSGGGGVAALR	6	1	1	LOC_Os03g19890.1	NADH dehydrogenase 1 alpha subcomplex subunit 5, putative, expressed	S3(Phospho)	1150.6	0	0	5.96422e+06			5.42403e+06				6.26534e+06	5.29867e+06	6.32865e+06	1	S(3): 100.0	0	7.727e-05	274.064																									High
IMQSQTLSDASK	5	1	1	LOC_Os06g50300.1	heat shock protein, putative, expressed	S4(Phospho)	1388.62	0	0	3.82132e+07								5.2955e+07	6.16845e+07	0.999909	S(4): 100.0; T(6): 0.0; S(8): 0.0; S(11): 0.0	0	3.816e-16	243.626	High	60.68	9.39291e-05	High	36.75	0.0232484	High	45.08	0.00341812
INESSLAISPER	19	1	1	LOC_Os04g57600.1	zinc finger C-x8-C-x5-C-x3-H type family protein, expressed	S9(Phospho)	1395.66	1.68252e+08	4.71316e+08	3.26733e+08	1.70155e+08	1.70359e+08	1.64243e+08	4.60078e+08	4.74118e+08	4.79753e+08	3.41081e+08	3.03607e+08	3.35511e+08	1	S(4): 0.0; S(5): 0.0; S(9): 100.0	0	2.729e-08	405.377	High	55.19	0.000337955	High	65.4	3.24309e-05	High	64.99	3.53882e-05	High	68.73	1.51718e-05	High	71.06	8.83317e-06	High	39.49	0.012888	High	86.86	2.32439e-07	High	82.84	5.30656e-07	High
INFLDSAR	13	3	1	LOC_Os02g48790.4	AML1, putative, expressed	S6(Phospho)	1015.46	0	1.62011e+07	1.21915e+07	12290538			1.91557e+07	1.82113e+07	1.12364e+07	2.04663e+07	1.61083e+07		1	S(6): 100.0	0	0.009352	282.213	High	23.27	0.482045	High	34.56	0.0362193	High	36.07	0.0255823	High	35.7	0.0277901	High	40.04	0.0101164	High	40.96	0.00818513	High	33.3	0.0481533
INSETLVTSSR	2	2	1	LOC_Os06g51360.2	lysM domain containing protein, putative, expressed	S3(Phospho)	1286.6	2.01735e+07	0	0		3.21748e+07	2.83456e+07							1	S(3): 100.0; T(5): 0.0; T(8): 0.0; S(9): 0.0; S(10): 0.0	0	8.162e-05	322.315																						High	38.3	0.0145101	High
INSFDSAINFK	7	1	1	LOC_Os06g14750.1	phosphatidylinositol-4-phosphate 5-Kinase family protein, putative, expressed	S3(Phospho)	1335.6	0	1.79958e+07	0				2.95634e+07	2.4424e+07			2.21161e+07		1	S(3): 100.0; S(6): 0.0	0	0.0001317	294.026	High	48.39	0.00155743	High	58.45	0.000152677	High	57.61	0.000187684	High	41.02	0.00852747	High	51.41	0.00076975
IPASTFGSSR	17	1	1	LOC_Os06g16410.1	armadillo/beta-catenin repeat family protein, putative, expressed	S8(Phospho)	1102.5	9.0963e+07	0	0	1.42174e+08		1.30715e+08							0.497727	S(4): 0.0; T(5): 49.8; S(8): 49.8; S(9): 0.5	0	0.004392	256.422	High	25.18	0.199327	High	24.79	0.218221	High	24.59	0.22503										High	44.53	0.0022816	High	24.65		High
IPDLNLQDGPVVLSPPRK	14	1	1	LOC_Os05g32600.1	cyclin-dependent kinase D-1, putative, expressed	S14(Phospho)	2038.07	4.08842e+07	0	0	7.48758e+07	4.77767e+07				3.84236e+07				1	S(14): 100.0	0	2.611e-11	652.652	High	41.73	0.00623757	High	33.16	0.0427749	High	32.18	0.050667				High	19.96		High	32.73	0.0458135	High	36.71	0.0192827	High	56.57	0.000205974	High
IPELSRPSPEECEISDMPELAFPLK	14	1	1	LOC_Os12g08800.1	las1-like family protein, putative, expressed	S8(Phospho); C12(Carbamidomethyl)	2964.42	0	3.38793e+07	8.48153e+07	4.43551e+07			2.73962e+07		7.42418e+07	7.96621e+07	9.30736e+07	8.17102e+07	1	S(5): 0.0; S(8): 100.0; S(15): 0.0	0	5.951e-10	455.894	High	50.39	0.00177018	High	37.58	0.0336071	High	37.69	0.0328346	High	48.55	0.00270756	High	31.87		High	37.77	0.0321601	High	53.25	0.000837714	High	27.88		High
IPNFSAAFQSK	5	1	1	LOC_Os03g45420.1	armadillo/beta-catenin repeat family protein, putative, expressed	S10(Phospho)	1289.6	0	0	1.20612e+07							2.00401e+07	1.61436e+07		1	S(5): 0.0; S(10): 100.0	0	0.004918	282.66																			High	29.27		High	32.02
IPQPSSGQESPTGK	65	1	1	LOC_Os12g21890.1	PTEN, putative, expressed	S10(Phospho)	1492.67	2.45124e+09	8.14875e+08	9.88337e+08	2.64507e+09	2.21802e+09	2.49064e+09	6.1508e+08	9.55967e+08	8.73578e+08	8.8591e+08	1.20105e+09	8.78047e+08	1	S(5): 0.0; S(6): 0.0; S(10): 100.0; T(12): 0.0	0	0.0001472	444.602	High	75.79	4.06259e-06	High	67.31	2.8796e-05	High	58.78	0.000204809	High	61.39	0.000111239	High	62.99	7.78129e-05	High	61.05	0.000121672	High	67	3.0747e-05	High	56.63	0.000335465	High
IPSGNTESAQPVYTVDSPPSSSQPQGNLNDR	13	3	1	LOC_Os09g35710.3	UBX domain-containing protein, putative, expressed	S17(Phospho)	3322.49	3.77087e+07	0	3.35759e+06	1.30083e+07	2.78838e+07	7.22339e+07			6.42379e+06		6.78356e+06	3.28922e+06	1	S(3): 0.0; T(6): 0.0; S(8): 0.0; Y(13): 0.0; T(14): 0.0; S(17): 100.0; S(20): 0.0; S(21): 0.0; S(22): 0.0	0	1.997e-11	421.252																High	36.76	0.0484036	High	68.14	3.56722e-05	High	52.51	0.00129798	High
IPVPVPPSPSGKDDEILTEPQELSK	45	3	1	LOC_Os03g51000.3	3,4-dihydroxy-2-butanone kinase, putative, expressed	S8(Phospho)	2752.38	3.33827e+08	0	5.90849e+08		4.60124e+08	5.41356e+08	5.07379e+08			6.24127e+08	5.87959e+08	5.60461e+08	0.985694	S(8): 98.6; S(10): 1.4; T(18): 0.0; S(24): 0.0	0	3.816e-16	432.69	High	48.31	0.00163656	High	29.76	0.120583	High	40.01	0.0109498	High	47.32	0.00214083	High	33.07		High	30.64		High	33.26		High	38.76	0.0150009	High
ISAEDEMAGMDQTR	27	1	1	LOC_Os02g40730.1	ammonium transporter protein, putative, expressed	M7(Oxidation); M10(Oxidation); T13(Phospho)	1665.62	5.11127e+07	7.38794e+08	2.47687e+08	7.58895e+07		7.74485e+07	7.56471e+08	6.84687e+08	7.75225e+08	3.99221e+08	3.4384e+08		1	S(2): 0.0; T(13): 100.0	0	3.511e-07	500.581	High	33.24	0.022811	High	39.82	0.00493016	High	38.88	0.00611508	High	59.25	5.7167e-05	High	76.59	1.04597e-06	High	32.23	0.0283348	High	33.8	0.0201765	High	22.12		High
ISAEDEMAGMDQTR	15	1	1	LOC_Os02g40730.1	ammonium transporter protein, putative, expressed	T13(Phospho)	1633.62	0	1.1273e+09	6.7219e+08	123340333			1.12263e+09	1.16305e+09	1.09621e+09	6.98994e+08	6.44512e+08	6.73064e+08	1	S(2): 0.0; T(13): 100.0	0	1.994e-07	563.749	High	57.41	0.000100761	High	68.02	8.96872e-06	High	73.58	2.4777e-06	High	84.43	2.00482e-07	High	81.42	4.03099e-07	High	77.06	1.09906e-06	High	55.77	0.00014964
ISAEDEMAGMDQTR	41	1	1	LOC_Os02g40730.1	ammonium transporter protein, putative, expressed	M7(Oxidation); T13(Phospho)	1649.62	0	1.4998e+08	6.87775e+07				1.40737e+08	1.33542e+08	1.7566e+08	7.96334e+07	6.15846e+07	6.51144e+07	1	S(2): 0.0; T(13): 100.0	0	4.969e-07	577.188	High	44.42	0.00199679	High	47.21	0.00102468	High	31.43	0.0410086	High	66.01	1.34578e-05	High	68.81	7.12194e-06	High	74.05	2.14091e-06	High	14.41
ISAEDETSGMDLTR	29	1	1	LOC_Os04g43070.1	ammonium transporter protein, putative, expressed	T13(Phospho)	1604.66	1.97531e+08	1.57849e+09	1.19456e+09	2.02201e+08	1.86577e+08	2.03816e+08	1.77567e+09	1.5761e+09	1.38369e+09	1.40655e+09	1.07519e+09	1.10194e+09	1	S(2): 0.0; T(7): 0.0; S(8): 0.0; T(13): 100.0	0	5.19e-09	558.721	High	87.2	1.88545e-07	High	95.91	2.53756e-08	High	75.89	2.48229e-06	High	95.47	2.76555e-08	High	82.73	5.26402e-07	High	89.69	1.0466e-07	High	43.46	0.00445181	High	58.36	0.000143329	High
ISAEDETSGMDLTR	31	1	1	LOC_Os04g43070.1	ammonium transporter protein, putative, expressed	M10(Oxidation); T13(Phospho)	1620.65	3.06317e+08	2.01867e+09	1.06945e+09	309017217	3.06766e+08	3.03167e+08	2.05044e+09	1.92926e+09	2.0763e+09	1.08118e+09	9.89955e+08	1.13723e+09	1	S(2): 0.0; T(7): 0.0; S(8): 0.0; T(13): 100.0	0	9.078e-07	516.586	High	66.72	1.95257e-05	High	66.25	2.17929e-05	High	81.02	7.18332e-07	High	66.29	2.15579e-05	High	65.02	2.8613e-05	High	65.32	2.66885e-05	High	66.86	1.91742e-05	High	63.08	4.53168e-05	High
ISLSAIAK	24	1	1	LOC_Os03g61010.1	protein kinase family protein, putative, expressed	S2(Phospho)	882.471	3.74245e+07	0	0	57873863		5.43995e+07		4.26375e+07		5.91993e+07			1	S(2): 100.0; S(4): 0.0	0	0.01623	213.646	High	27.61	0.156042	High	34.6	0.031137	High	10.98	7.16599	High	30.49		High	34.39	0.0326796	High	28.25		High	36.97	0.0176097	High	31.68		High
ISNSDDNVVVEK	20	1	1	LOC_Os03g64320.1	expressed protein	S2(Phospho)	1398.62	1.82601e+08	5.81543e+07	7.30301e+07	1.93246e+08	1.67101e+08	1.87456e+08		8.42576e+07	9.02053e+07	1.15802e+08	1.03288e+08		1	S(2): 100.0; S(4): 0.0	0	0.0001242	274.064	High	63.67	3.73482e-05	High	25.16	0.262881	High	63.68	3.75409e-05	High	27.17		High	35.27	0.0256752	High	32.94	0.0441336	High	45.83	0.00231568	High	51.17	0.000663009	High
ISPSELAAVTR	21	1	1	LOC_Os01g04330.1	OsCML16 - Calmodulin-related calcium sensor protein, expressed	S2(Phospho)	1223.61	1.09218e+08	0	2.33479e+08	1.82217e+08	1.45436e+08					2.57027e+08	2.13284e+08	2.30124e+08	1	S(2): 100.0; S(4): 0.0; T(10): 0.0	0	1.842e-09	228.47	High	21.09	1.2149	High	25.26	0.466138	High	22.87	0.812323										High	42.72	0.00838999	High	35.64	0.0422173	High
ISRDSYPNLR	68	3	2	LOC_Os05g44922.2 ;LOC_Os01g53680.1	6-phosphofructokinase, putative, expressed	S5(Phospho)	1300.61	1.30174e+09	2.23631e+09	3.0346e+09	6.09113e+08	1.5616e+09	1.73451e+09	2.10927e+09	2.33122e+09	2.26845e+09	2.80949e+09	2.97292e+09	3.32138e+09	0.999956	S(2): 0.0; S(5): 100.0; Y(6): 0.0	0	0.0006307	312.569	High	54.56	0.000347496	High	54.38	0.000358006	High	54.43	0.000353547	High	54.46	0.000350218	High	54.34	0.000369049	High	54.38	0.00036366	High	54.46	0.000354336	High	50.22	0.000943951	High
ITETVQSPVK	15	1	1	LOC_Os07g48602.1	EMB1011, putative, expressed	S7(Phospho)	1181.58	0	2.4798e+08	2.22712e+08			2.41233e+08	2.48627e+08	2.38111e+08	2.57202e+08	2.24369e+08	2.15631e+08	2.28138e+08	1	T(2): 0.0; T(4): 0.0; S(7): 100.0	0	0.009055	327.753	High	41.62	0.00957571	High	54.14	0.000534466	High	54.15	0.000534775	High	53.23	0.000659052	High	55.95	0.000351544	High	53.48	0.000620839	High	29.46					High
ITHSDSQQIPSGER	26	2	1	LOC_Os11g28270.2	zinc finger C-x8-C-x5-C-x3-H type family protein, expressed	S6(Phospho)	1634.72	1.2501e+08	0	0	1.19338e+08	1.21811e+08	1.33881e+08				1.46099e+08			1	T(2): 0.0; S(4): 0.0; S(6): 100.0; S(11): 0.0	0	4.32e-06	455.676	High	49.32	0.00132621	High	42.86	0.00584637	High	31.7	0.0766678										High	42.32	0.00660871	High	47.79	0.00189047	High
ITSSGGTPVAELK	12	1	1	LOC_Os12g37840.1	boron transporter protein, putative, expressed	S3(Phospho); T7(Phospho)	1419.62	1.08709e+08	5.77868e+07	4.90121e+07	1.17663e+08	1.09711e+08	9.87523e+07		9.67223e+07	7.66381e+07	7.8518e+07	6.85183e+07		0.999994	T(2): 0.0; S(3): 100.0; S(4): 0.0; T(7): 100.0	0	0.001067	283.645	High	26.85	0.205815	High	33.28	0.0463551	High	36.38	0.0226232	High	30.69		High	40.53	0.00871839	High	33.97	0.0387037	High	35.37	0.0297808	High	42.35	0.00592872	High
ITSSGGTPVAELK	11	1	1	LOC_Os12g37840.1	boron transporter protein, putative, expressed	S3(Phospho)	1339.65	3.32155e+07	0	0	3.11132e+07	3.31004e+07	3.54329e+07			2.63762e+07			2.52484e+07	0.499953	T(2): 0.0; S(3): 50.0; S(4): 50.0; T(7): 0.0	0	0.0001339	247.231				High	19.1	1.25856	High	19.26	1.20948				High	29.28		High	40.87	0.00839745	High	42.13	0.00626128	High	47.81	0.00168143	High
IVSAPSDTPSDAAETAESPTENNASK	3	1	1	LOC_Os06g50310.1	E2F-related protein, putative, expressed	S18(Phospho)	2669.16	3.42247e+07	0	0		3.71095e+07	6.55647e+07							0.499878	S(3): 0.0; S(6): 0.0; T(8): 0.0; S(10): 0.0; T(15): 0.0; S(18): 50.0; T(20): 50.0; S(25): 0.0	0	3.734e-07	288.546																						High	42.18	0.0115499	High
IVSPTHSILETDR	10	1	1	LOC_Os01g46710.1	transposon protein, putative, CACTA, En/Spm sub-class, expressed	S3(Phospho)	1547.75	2.03326e+07	0	0	21095994	1.74896e+07	2.24123e+07							1	S(3): 100.0; T(5): 0.0; S(7): 0.0; T(11): 0.0	0	0.0005498	264.587																High	21.93		High	41.67	0.00877512	High	34.76	0.0429775	High
KAAAAAASPKPAAQAK	8	1	1	LOC_Os01g41880.1	hyaluronan/mRNA binding family domain containing protein, expressed	S8(Phospho)	1531.8	6.42873e+07	0	0	6.5127e+07	6.28192e+07	6.49156e+07						3.27192e+07	1	S(8): 100.0	0	2.668e-06	444.968																			High	42.67	0.00535617	High	47.56	0.00173722	High
KADPAESPVASSEAGAGTNHHQETPSSELKPR	48	1	1	LOC_Os04g54440.3	RNA binding protein, putative, expressed	S7(Phospho)	3365.55	9.97943e+08	0	0		1.25539e+09	1.73844e+09		6.04124e+08		5.32482e+08			1	S(7): 100.0; S(11): 0.0; S(12): 0.0; T(18): 0.0; T(24): 0.0; S(26): 0.0; S(27): 0.0	0	4.866e-10	410.912	High	40.02	0.0211822	High	42.16	0.0129472	High	35.72	0.0574146	High	27.52		High	39.48	0.0238177	High	31.29		High	34.31		High	42.33	0.0124297	High
KADVGEQSVK	19	1	1	LOC_Os02g08364.1	protein phosphatase 2C, putative, expressed	S8(Phospho)	1140.53	5.09535e+07	2.11434e+08	1.9533e+08	6.21857e+07		9.06747e+07	2.8986e+08	3.44442e+08		1.84218e+08	1.99028e+08	2.02744e+08	1	S(8): 100.0	0	0.001434	374.521	High	40.44	0.00694906	High	39.45	0.00866581	High	48.37	0.00113235	High	52.04	0.000477007	High	45.28	0.00230664	High	26.07		High	34.62	0.0271456				High
KAPASPEQPIIAPLLK	17	3	1	LOC_Os10g41030.3	agenet domain containing protein, putative, expressed	S5(Phospho)	1752.97	4.88063e+07	0	5.31881e+07	4.01432e+07	4.37735e+07	6.25023e+07				5.75616e+07	4.82698e+07	5.37329e+07	1	S(5): 100.0	0	4.573e-05	506.366	High	25.8	0.13901	High	34.56	0.0163949	High	40.3	0.00460094										High	30.21	0.0446385	High	31.12	0.0360842	High
KAPSPQAQQSAKR	2	2	1	LOC_Os01g25820.2	respiratory burst oxidase, putative, expressed	S10(Phospho)	1476.73	9.43764e+06	0	0	1.39745e+07	1.43384e+07								1	S(4): 0.0; S(10): 100.0	0	0.000138	442.168																			High	55.56	0.000279639	High	44.11	0.00385821
KASSHASMAAAAADPDDFDLTR	37	1	1	LOC_Os04g35280.1	neutral/alkaline invertase, putative, expressed	S3(Phospho)	2328	1.01982e+08	0	9.2835e+07	1.00276e+08	9.43756e+07	1.11296e+08		4.57939e+07		1.45684e+08		1.32821e+08	0.989385	S(3): 98.9; S(4): 1.0; S(7): 0.0; T(21): 0.0	0	8.836e-11	596.43	High	34.82	0.0498699	High	36.03	0.0378056	High	34.91	0.0494928	High	28.9		High	38.61	0.02145				High	56.9	0.000313305	High	77.74	2.58206e-06	High
KASSHASMAAAAADPDDFDLTR	13	1	1	LOC_Os04g35280.1	neutral/alkaline invertase, putative, expressed	S4(Phospho); S7(Phospho)	2407.96	0	2.57655e+07	0				3.07875e+07	4.65091e+07					0.495075	S(3): 50.5; S(4): 50.5; S(7): 99.0; T(21): 0.0	0	7.111e-05	309.33										High	49.53	0.00133715	High	37.91	0.0197244							High	25.25
KDDGQGDSVTVGGTR	16	1	1	LOC_Os02g48010.1	nuclear matrix constituent protein 1-like, putative, expressed	S8(Phospho); T10(Phospho)	1651.64	6.7159e+07	5.04184e+07	1.52932e+08		1.03012e+08	9.84646e+07	7.89411e+07		7.23141e+07	1.7485e+08	1.25891e+08	1.58054e+08	1	S(8): 100.0; T(10): 100.0; T(14): 0.0	0	1.786e-06	441.719	High	28.49	0.094575				High	21.63	0.515988	High	46.7	0.00144312	High	41.93	0.00435381	High	45.68	0.0018076				High	48.47	0.000975718	High
KDEAAAAAAAGGDEAGAIEGTGSFK	17	1	1	LOC_Os01g65380.1	patellin protein, putative, expressed	S23(Phospho)	2345.03	2.30019e+06	0	0	2.43752e+06	1.06456e+06	3.3985e+06							0.999996	T(21): 0.0; S(23): 100.0	0	3.771e-09	455.512	High	23.48	0.783958				High	30.38	0.164691										High	70.94	1.44565e-05	High	58.94	0.000226951	High
KDIGNASNSYSFK	10	1	1	LOC_Os06g40704.2	stromal membrane-associated protein, putative, expressed	S11(Phospho)	1510.67	1.02446e+08	0	0	1.11044e+08	9.45913e+07	1.01704e+08						4.7524e+07	0.999952	S(7): 0.0; S(9): 0.0; Y(10): 0.0; S(11): 100.0	0	1.276e-06	438.806	High	58.24	0.000153793	High	42.04	0.00635175	High	60.18	9.79548e-05										High	57.72	0.000171664	High	59.59	0.000115945	High
KDSAESIGSDLSSLR	8	1	1	LOC_Os06g43560.1	phox domain-containing protein, putative, expressed	S3(Phospho)	1644.75	2.4087e+07	0	0	3.48327e+07		3.74282e+07		1.26302e+07					1	S(3): 100.0; S(6): 0.0; S(9): 0.0; S(12): 0.0; S(13): 0.0	0	3.201e-09	374.118	High	43.83	0.00468648							High	16.21		High	59.96	0.000115761	High	63.97	4.50173e-05	High	47.11	0.00224495	High	57.08	0.00022801	High
KDSAESIGSDLSSLR	9	1	1	LOC_Os06g43560.1	phox domain-containing protein, putative, expressed	S3(Phospho); S6(Phospho)	1724.71	0	1.65176e+07	3.0765e+07	2.76943e+07				4.26703e+07	6.88265e+06	3.6715e+07	3.1176e+07	2.4404e+07	1	S(3): 100.0; S(6): 100.0; S(9): 0.0; S(12): 0.0; S(13): 0.0	0	2.772e-14	377.99				High	29.03	0.121838	High	28.84	0.127221				High	48.64	0.00134174	High	46.73	0.00207972	High	48.28	0.00146216
KDSELTNEDEKPIAPKPNDQVPEVSPDLGSPIK	33	1	1	LOC_Os03g26630.2	SAP domain containing protein, expressed	S30(Phospho)	3666.8	2.57924e+08	0	2.07699e+08	437779360	3.35991e+08				6.07952e+08		3.32673e+08	2.90424e+08	1	S(3): 0.0; T(6): 0.0; S(25): 0.0; S(30): 100.0	0	2.192e-10	477.875	High	35.95	0.0382925	High	34.69	0.0501627	High	28.87	0.19529	High	32.71		High	26.75		High	35.32	0.0441676	High	37.01	0.0299198	High	44.26	0.00549523	High
KEEAKEESDDDMGFSLFD	494	1	1	LOC_Os08g02340.1	60S acidic ribosomal protein, putative, expressed	S8(Phospho)	2171.84	1.14121e+09	8.92938e+08	2.23589e+09	851963152	7.24733e+08	1.84695e+09	5.23927e+08	9.58366e+08	1.19652e+09	2.6165e+09	1.99753e+09	2.09365e+09	1	S(8): 100.0; S(15): 0.0	0	1.713e-05	573.154	High	65.77	2.26712e-05	High	70.07	8.43298e-06	High	58.75	0.00011715	High	70.07	8.40837e-06	High	72.55	5.74805e-06	High	65.27	2.53483e-05	High	66.52	2.33206e-05	High	69.6	1.13376e-05	High
KEEAKEESDDDMGFSLFD	46	1	1	LOC_Os08g02340.1	60S acidic ribosomal protein, putative, expressed	S8(Phospho); M12(Oxidation)	2187.83	4.11434e+08	5.03625e+08	8.68041e+08	361884114	4.55261e+08	4.17157e+08	5.04383e+08	3.51734e+08	6.54757e+08	9.14902e+08	7.85576e+08	9.03645e+08	1	S(8): 100.0; S(15): 0.0	0	0.0004449	407.433	High	39.68	0.0083749	High	45.38	0.00236423	High	44.28	0.00300653	High	38.82	0.010865	High	46.42	0.00184138	High	40.87	0.00713701	High	44.31	0.00319712	High	40.47	0.00738135	High
KEEVPTVESEENESPQSK	22	1	1	LOC_Os01g51640.1	expressed protein	S14(Phospho)	2125.93	4.45991e+07	0	2.75667e+07	70600903	6.31963e+07				4.22307e+07	2.65809e+07	5.61193e+07		0.999875	T(6): 0.0; S(9): 0.0; S(14): 100.0; S(17): 0.0	0	6.85e-06	421.008	High	18.66	2.17082	High	12.78	8.41986				High	31.99					High	46.68	0.00336135	High	37.59	0.0278863	High	41.64	0.0109644	High
KEPTPPLPPPPPLLPELIPGR	9	1	1	LOC_Os12g15420.1	nucampholin, putative, expressed	T4(Phospho)	2335.28	0	2.21342e+07	3.02429e+07				2.11496e+07	2.88864e+07	1.63666e+07	6.41497e+07	7.42313e+06	1.91559e+07	1	T(4): 100.0	0	1.352e-10	521.409	High	17.9	0.517357	High	25.84	0.0785755	High	21.25	0.218219	High	43.29	0.00157052	High	39.88	0.00305835	High	49.86	0.000322738
KFDSFSR	10	1	1	LOC_Os07g43030.1	calmodulin-binding transcription activator, putative, expressed	S4(Phospho)	966.412	3.37776e+08	0	3.57439e+08		4.84063e+08	5.29264e+08					5.23968e+08	5.48349e+08	0.992484	S(4): 99.2; S(6): 0.8	0.001	0.01463	202.257										High	22.08								High	17.15		High	35.32	0.0118828	High
KFGAADTFKIPDEVDIAHLS	14	1	1	LOC_Os08g08110.1	diacylglycerol kinase, putative, expressed	T7(Phospho)	2254.08	0	2.45396e+07	0				2.67003e+07		4.69184e+07				1	T(7): 100.0; S(20): 0.0	0	4.306e-06	379.193	High	28.33	0.263599	High	30.62	0.154059	High	41.5	0.0126899	High	35.45	0.0464716	High	25.55		High	35.87	0.0421102	High	27.85		High	18.82
KFSPIIWDR	9	1	1	LOC_Os04g41100.5	cyclin-dependent kinase G-2, putative, expressed	S3(Phospho)	1241.61	6.71939e+06	0	2.21321e+07		8.96779e+06	1.11904e+07				2.32197e+07	1.97411e+07	2.34357e+07	1	S(3): 100.0	0	0.001077	370.53	High	32.01	0.0623841	High	32.63	0.0609884	High	19.05	1.37581													High	41.1	0.00858529	High
KGGGEESAGSGGAAGGLFK	17	2	1	LOC_Os10g18340.1	expressed protein	S10(Phospho)	1716.76	0	1.18605e+08	1.1874e+08				1.21034e+08	1.13455e+08	1.21327e+08	1.37038e+08	1.1625e+08	1.02931e+08	1	S(7): 0.0; S(10): 100.0	0	9.844e-12	521.279	High	43.67	0.00645378	High	64.69	5.15042e-05	High	50.7	0.00129075	High	37.27	0.0281718	High	46.36	0.00346116	High	43.48	0.00675811
KGPDPPLSPDTVHAQWDSR	33	3	1	LOC_Os01g49529.2	OsWAK10d - OsWAK receptor-like cytoplasmic kinase OsWAK-RLCK, expressed	S8(Phospho)	2183	6.00197e+07	0	1.30633e+08		7.79013e+07	1.02158e+08				1.58356e+08	1.28146e+08	1.05397e+08	1	S(8): 100.0; T(11): 0.0; S(18): 0.0	0	3.061e-08	472.574	High	30.54	0.15891	High	32.38	0.103855	High	27.32	0.336138	High	31.69		High	28.5		High	25.84		High	30.71		High	47.96	0.00287121	High
KGSFHDIDPGIPTTPGPQSATELDPK	20	2	1	LOC_Os01g14050.2	C2 domain containing protein, putative, expressed	S3(Phospho)	2785.3	0	3.00571e+08	0		3.57949e+08		5.52958e+08		3.48754e+08			4.38624e+08	1	S(3): 100.0; T(13): 0.0; T(14): 0.0; S(19): 0.0; T(21): 0.0	0	5.338e-08	442.671	High	14.19	7.08973	High	18.96	2.34548	High	20.97	1.4505	High	45.47	0.00533387	High	11.9		High	37.6	0.0325577	High	33.19		High	40.21	0.0178745	High
KGSTSEALSQEEK	5	1	1	LOC_Os07g05190.1	leucine-rich repeat family protein, putative, expressed	S3(Phospho)	1473.65	1.8096e+07	2.05531e+07	0	2.78265e+07	2.64615e+07		2.90859e+07		3.25733e+07		1.9626e+07		1	S(3): 100.0; T(4): 0.0; S(5): 0.0; S(9): 0.0	0	2.695e-07	444.809										High	66.1	3.32368e-05				High	63.68	5.82612e-05	High	53.48	0.000601094	High	61.85	8.84992e-05
KHIDATLGSGNLR	11	3	1	LOC_Os03g38020.1	mps one binder kinase activator-like 1A, putative, expressed	T6(Phospho)	1461.73	0	0	3.60071e+07							5.01646e+07		5.78568e+07	0.999999	T(6): 100.0; S(9): 0.0	0	0.0001336	292.882	High	33.46	0.0507845	High	17.26	2.11705	High	22.37	0.652726							High	11.04		High	23.83					High
KISDAFSSELVK	6	1	1	LOC_Os04g46320.1	inactive receptor kinase At2g26730 precursor, putative, expressed	S3(Phospho)	1403.68	0	0	6.97138e+06	7.04829e+06							3.94867e+06	1.69655e+07	1	S(3): 100.0; S(7): 0.0; S(8): 0.0	0	1.6e-09	346.902																			High	33.42	0.0478192	High	24.27		High
KKEDSEGGVSGGGGGAEDGGGSK	5	2	1	LOC_Os12g06340.3	BEL1-like homeodomain transcription factor, putative, expressed	S10(Phospho)	2101.87	8.62454e+06	0	0		1.28582e+07	1.30154e+07					1.72991e+07		0.975377	S(5): 2.5; S(10): 97.5; S(22): 0.0	0	9.329e-09	238.637																						High	41.92	0.00842885	High
KKEDSEGVSGGGTEDGGGAK	16	1	1	LOC_Os11g06020.1	homeobox domain containing protein, expressed	S9(Phospho)	1944.82	5.58531e+07	0	0	5.28878e+07	5.91017e+07	5.55697e+07							1	S(5): 0.0; S(9): 100.0; T(13): 0.0	0	8.999e-10	410.32				High	70.42	1.30908e-05				High	19.02		High	33.62					High	71.7	9.67813e-06	High	57.05	0.000284423	High
KKESLANLLIPPK	10	1	1	LOC_Os01g45640.1	tat pathway signal sequence family protein, expressed	S4(Phospho)	1530.87	0	3.685e+07	2.27742e+07	11146123			5.23012e+07	3.73815e+07	2.08673e+07	2.988e+07	2.15546e+07	1.68881e+07	1	S(4): 100.0	0	0.0001024	402.475										High	37.19	0.00712375	High	29.78	0.0402375	High	37.05	0.00717962	High	30.82	0.0310064	High	26.5		High
KKSDAALVR	21	1	1	LOC_Os01g37690.1	sodium/calcium exchanger protein, putative, expressed	S3(Phospho)	1067.56	1.30431e+08	3.36958e+08	1.11054e+08	6.29603e+07	1.31562e+08	1.96772e+08	3.64799e+08	2.84155e+08	3.61921e+08	1.54893e+08		1.78268e+08	1	S(3): 100.0	0	0.01399	266.666										High	41.85	0.00569203	High	46.5	0.00194657	High	45.42	0.00250189	High	44.13	0.00336719	High	45.47	0.00252717	High
KLADVHSETDDELIEELR	6	1	1	LOC_Os08g40230.1	expressed protein	T9(Phospho)	2192.02	0	2.57943e+07	0				4.39065e+07		3.34765e+07	3.28752e+07			0.999998	S(7): 0.0; T(9): 100.0	0	2.568e-08	434.169				High	60.51	0.000134136				High	46.55	0.00331632				High	69.52	1.64291e-05
KLEETPAGNTGTDQDSDVHGSGEQQK	25	1	1	LOC_Os02g54510.3	protein kinase domain containing protein, expressed	S21(Phospho)	2808.21	1.49404e+08	0	1.84413e+08	2.34173e+08	2.1404e+08			3.19595e+08		2.87738e+08		2.65501e+08	1	T(5): 0.0; T(10): 0.0; T(12): 0.0; S(16): 0.0; S(21): 100.0	0	2.186e-09	639.187	High	25.42	0.518463	High	48.98	0.00227653	High	47.76	0.00304086	High	20.12		High	40.47	0.0162479	High	33.93		High	41.22	0.0137276	High	46.67	0.00390622	High
KLFLASSPTK	32	1	1	LOC_Os01g69100.1	expressed protein	S7(Phospho)	1171.62	1.58396e+07	2.82027e+07	4.03313e+07	1.72066e+07	1.38842e+07	1.64279e+07	3.32854e+07	5.13227e+07		3.67474e+07	3.97316e+07	4.4515e+07	0.992374	S(6): 0.8; S(7): 99.2; T(9): 0.0	0	0.00506	283.43	High	33.98	0.0374348	High	18.3	1.37187	High	10.55	8.10124	High	34.33	0.0345916	High	34.74	0.0311397	High	30.9		High	34.27	0.0350729	High	34.36	0.0336939	High
KLNCSSSFNTASSK	15	2	1	LOC_Os01g62650.2	pumilio-family RNA binding protein, putative, expressed	C4(Carbamidomethyl); S7(Phospho)	1610.69	6.20131e+07	0	0	62970338	5.64604e+07	6.66084e+07					5.76059e+07		0.499978	S(5): 0.0; S(6): 50.0; S(7): 50.0; T(10): 0.0; S(12): 0.0; S(13): 0.0	0	6.528e-06	305.528	High	17.98	1.36293	High	4.06	34.9258	High	20.75	0.737904										High	53.2	0.000415451	High	36.14	0.0211359	High
KLSFQAGMAPPSPMR	23	1	1	LOC_Os05g03190.1	IQ calmodulin-binding motif domain containing protein, expressed	S3(Phospho)	1697.8	5.92911e+07	0	2.42014e+07	4.6801e+07	6.46853e+07	6.6387e+07					3.45719e+07	3.80324e+07	1	S(3): 100.0; S(12): 0.0	0	1.253e-06	448.983	High	68.64	1.75411e-05	High	80.97	1.02819e-06	High	48.67	0.00175766	High	27					High	9.91		High	81.01	1.01836e-06	High	69.09	1.58516e-05	High
KLSFQAGMAPPSPMR	31	1	1	LOC_Os05g03190.1	IQ calmodulin-binding motif domain containing protein, expressed	S3(Phospho); S12(Phospho)	1777.76	2.31027e+08	9.51746e+07	1.06616e+08	2.37316e+08	1.99366e+08	2.564e+08	1.346e+08	1.50923e+08		1.74103e+08		1.45744e+08	1	S(3): 100.0; S(12): 100.0	0	4.294e-07	515.229	High	35.53	0.0331119	High	44.58	0.00405639	High	47.64	0.00203353	High	45.12	0.00362979	High	45.45	0.00336705	High	26.48		High	52.77	0.000616167	High	50.9	0.00094776	High
KLSLDASSSDSR	23	1	1	LOC_Os03g24180.1	pleckstrin homology domain-containing protein, putative, expressed	S3(Phospho)	1345.6	5.07353e+07	0	6.11717e+07	64071244		8.81346e+07				4.80975e+07	5.52164e+07	8.02013e+07	1	S(3): 100.0; S(7): 0.0; S(8): 0.0; S(9): 0.0; S(11): 0.0	0	0.008192	270.061	High	40.31	0.00857085	High	41.48	0.00655028	High	35.88	0.0239892				High	21.85		High	8.9		High	44.34	0.00341808	High	41.91	0.00599722	High
KLSLPSPK	27	1	1	LOC_Os01g72080.1	calmodulin-like protein 1, putative, expressed	S3(Phospho)	949.516	2.23657e+08	0	1.45523e+08	2.44514e+08	2.58713e+08	1.67743e+08				1.18664e+08	1.42301e+08	1.75603e+08	1	S(3): 100.0; S(6): 0.0	0	0.0008816	215.612										High	23.86		High	25.33					High	40.57	0.00523569	High	39.57	0.00686737	High
KLTSLASNIMSDLQDR	23	1	1	LOC_Os10g42420.1	GTPase-activating protein, putative, expressed	S7(Phospho)	1871.91	1.64928e+07	0	0	1.36184e+07	1.62664e+07	1.95938e+07	7.60682e+06			3.48926e+07			1	T(3): 0.0; S(4): 0.0; S(7): 100.0; S(11): 0.0	0	2.816e-08	453.659	High	64.57	5.96855e-05	High	26.42	0.391535	High	51.2	0.00130399	High	35.84	0.0447477	High	21.85					High	54.6	0.000586679	High	50.78	0.0014293	High
KLVNSSFADLQKPQMELDGK	29	1	1	LOC_Os05g38150.1	amino acid kinase, putative, expressed	S6(Phospho)	2328.14	3.63775e+08	1.71465e+08	0	4.11365e+08	3.54961e+08	3.24998e+08	2.98917e+08		2.15478e+08				0.999828	S(5): 0.0; S(6): 100.0	0	1.736e-10	456.953	High	59.76	0.000151442	High	45.4	0.00406937	High	48.63	0.00196927	High	59.49	0.000161662				High	35.57	0.039395	High	61	0.000111405	High	50.08	0.00138525	High
KLVPGEPNISYICSR	11	1	1	LOC_Os10g37740.1	CGMC_GSK.9 - CGMC includes CDA, MAPK, GSK3, and CLKC kinases, expressed	Y11(Phospho); C13(Carbamidomethyl)	1812.88	0	0	1.69398e+07	1.23248e+07						2.13204e+07	1.66427e+07	1.28563e+07	0.987788	S(10): 1.2; Y(11): 98.8; S(14): 0.0	0	2.528e-05	253.641	High	6.78	33.9713				High	13.45	7.25681	High	21.65					High	32.33		High	38.57	0.021301
KMSAGVSNMSFK	6	1	1	LOC_Os10g42724.1	VHS and GAT domain containing protein, expressed	S3(Phospho); S10(Phospho)	1446.56	3.66769e+07	0	0	33625252	3.58842e+07	4.05214e+07				2.1418e+07			0.999772	S(3): 100.0; S(7): 0.0; S(10): 100.0	0	0.001677	294.097							High	41.74	0.00355374										High	38.49	0.00773023	High	37.92	0.00862875	High
KMTAGMSSMSFK	22	1	1	LOC_Os02g46962.1	VHS and GAT domain containing protein, expressed	S10(Phospho)	1385.57	1.69351e+08	5.94128e+07	1.05058e+08	1.67928e+08	1.69884e+08	1.70241e+08	6.08307e+07	6.24982e+07	5.49094e+07		1.53804e+08	1.6137e+08	0.999929	T(3): 0.0; S(7): 0.0; S(8): 0.0; S(10): 100.0	0	0.0007939	373.309	High	55.11	0.000228464	High	43.57	0.00299548	High	63.13	3.60185e-05	High	48.65	0.00098864	High	40.22	0.00711528	High	49.62	0.000807666	High	63.07	3.65688e-05	High	54.35	0.000271973	High
KPAAAGSPPPGAAAAAGHK	101	1	1	LOC_Os01g15260.1	dynein light chain type 1 domain containing protein, expressed	S7(Phospho)	1706.84	2.79922e+09	0	5.97995e+08	2424305296	3.0713e+09	2.90206e+09				7.09489e+08	4.03103e+08	6.81393e+08	1	S(7): 100.0	0	7.323e-10	633.315	High	37.67	0.0190154	High	40.71	0.00946412	High	37.33	0.0207026										High	92.49	6.38601e-08	High	83.67	4.81081e-07	High
KPAAGEEKSAEKAPAGK	19	1	1	LOC_Os03g17084.1	Core histone H2A/H2B/H3/H4 domain containing protein, putative	S9(Phospho)	1748.86	7.5025e+07	0	4.33442e+07	73338994	8.01615e+07	7.15744e+07		8.7911e+07			6.87604e+07	6.12722e+07	1	S(9): 100.0	0	2.668e-06	359.193				High	46.11	0.00273071				High	23.45		High	39.09	0.0137491	High	7.88		High	35.74	0.0302822	High	46.98	0.00225804	High
KPAGMPYGSASAGDAQNAASPVDR	11	2	1	LOC_Os03g53670.1	YT521-B-like family domain containing protein, expressed	S20(Phospho)	2398.06	1.5469e+08	0	6.30176e+07	1.56375e+08	1.49266e+08	1.58428e+08				7.24965e+07	5.14297e+07	6.51267e+07	1	Y(7): 0.0; S(9): 0.0; S(11): 0.0; S(20): 100.0	0	2.624e-10	519.75							High	44.98	0.00556747										High	79.78	1.85513e-06	High	82.82	9.19417e-07	High
KPALSQSASFPAR	119	1	1	LOC_Os11g36340.1	lymphoid organ expressed yellow head virus receptor protein, putative, expressed	S9(Phospho)	1439.71	2.50863e+09	1.08549e+09	1.6443e+09	2.01214e+09	2.70919e+09	2.80456e+09	9.97186e+08	1.27134e+09	9.87954e+08	1.1266e+09	1.63153e+09	2.17476e+09	1	S(5): 0.0; S(7): 0.0; S(9): 100.0	0	3.926e-06	480.563	High	80.8	1.0526e-06	High	86.61	2.68148e-07	High	82.37	7.13277e-07	High	85.91	3.14534e-07	High	92.27	7.50643e-08	High	92.33	7.14321e-08	High	87.18	2.33826e-07	High	87.31	2.26931e-07	High
KPATSIGSAYR	30	3	1	LOC_Os06g03860.2	uncharacterized membrane protein, putative, expressed	S8(Phospho)	1230.59	0	7.51244e+08	5.28851e+08				7.98281e+08	7.12289e+08	7.43162e+08	5.64911e+08	4.78852e+08	5.4279e+08	0.5	T(4): 0.0; S(5): 50.0; S(8): 50.0; Y(10): 0.0	0	0.003173	336.67	High	52.24	0.000524794	High	45.54	0.00225917	High	36.95	0.0164194	High	37.13	0.0173116	High	51.72	0.000544438	High	41.6	0.00619189	High	30.28		High	28.7		High
KPHAEILSSSPK	87	1	1	LOC_Os06g17840.1	expressed protein	S10(Phospho)	1373.69	1.97379e+08	4.85582e+08	3.89665e+08	2.01751e+08	1.58837e+08	2.3155e+08	5.26651e+08	3.77663e+08	5.52432e+08	3.20945e+08	3.4994e+08	4.98111e+08	0.993112	S(8): 0.0; S(9): 0.7; S(10): 99.3	0	0.0002848	417.739	High	22.2	0.624854	High	30.24	0.0981721	High	15.97	2.5685	High	33.23	0.0492923	High	46.33	0.00234322	High	40.76	0.00856669	High	37.82	0.0168583	High	36.6	0.0223152	High
KPMAGGPEKSPK	25	1	1	LOC_Os07g39620.1	C2 domain containing protein, putative, expressed	M3(Oxidation); S10(Phospho)	1322.62	0	5.23561e+07	0					6.49818e+07	9.20864e+07				1	S(10): 100.0	0	4.458e-05	440.161				High	32.3	0.0537614	High	41.71	0.00611122	High	26.45		High	37.77	0.0153323	High	42.37	0.00534523				High	32.17		High
KPSSPFGTAESSSGSR	12	2	1	LOC_Os02g16600.2	expressed protein	S4(Phospho)	1661.73	2.37599e+07	0	0	3.17022e+07		3.95774e+07			1.37204e+07			2.37247e+07	0.999854	S(3): 0.0; S(4): 100.0; T(8): 0.0; S(11): 0.0; S(12): 0.0; S(13): 0.0; S(15): 0.0	0	0.0005096	286.734										High	24.17					High	34.44	0.0443031	High	41.57	0.00898648	High	34.01		High
KQDTENSSIDDK	12	4	1	LOC_Os08g12760.4	YT521-B, putative, expressed	S8(Phospho)	1459.6	4.20422e+06	0	0	6.65499e+06	5.95766e+06								0.5	T(4): 0.0; S(7): 50.0; S(8): 50.0	0	0.002108	363.222							High	9.04	13.0539	High	10.56		High	29.38		High	22.29		High	41.57	0.00532223	High	44.55	0.00269904
KQENSDSFSR	37	1	1	LOC_Os03g20530.1	DUF630/DUF632 domains containing protein, putative, expressed	S7(Phospho)	1277.52	6.34767e+07	3.47142e+08	2.05067e+08	9.14406e+07		9.89896e+07	3.56439e+08	3.22382e+08	3.62606e+08	1.9095e+08	2.12502e+08	2.11751e+08	1	S(5): 0.0; S(7): 100.0; S(9): 0.0	0	0.001141	383.576	High	40.45	0.00859197	High	40.53	0.00828026	High	40.9	0.00772189	High	43.09	0.0046219	High	47.71	0.00160962	High	44.35	0.00340287	High	38.63	0.0130851	High	31.21		High
KQSPEEVSGPESGQCEAEADGEDNMK	16	1	1	LOC_Os03g01970.1	THO complex subunit 1, putative, expressed	S3(Phospho); C15(Carbamidomethyl)	2888.13	1.0139e+08	1.08014e+08	5.35937e+07	1.00424e+08	9.54873e+07	1.08259e+08	1.0753e+08	1.15603e+08	1.0091e+08		7.92782e+07	8.15028e+07	1	S(3): 100.0; S(8): 0.0; S(12): 0.0	0	1.44e-10	497.08	High	45.77	0.00320336	High	60.75	9.97474e-05	High	57.76	0.000197141	High	52.26	0.000735437	High	63.39	5.52748e-05	High	50.61	0.00105535	High	47.81	0.00205233	High	57.31	0.000219778	High
KQSQLQADSATIEPINK	22	1	1	LOC_Os01g56910.1	expressed protein	S3(Phospho)	1950.96	1.02863e+08	0	7.16808e+07	9.27944e+07	1.00564e+08	1.1523e+08				7.05306e+07	6.77778e+07	7.67341e+07	1	S(3): 100.0; S(9): 0.0; T(11): 0.0	0	3.816e-16	505.335	High	74.58	5.56991e-06	High	40.87	0.0128581	High	47.56	0.00275008										High	51.72	0.000889675	High	80.13	1.5072e-06	High
KRSDLGTLMKPK	21	1	1	LOC_Os03g45340.1	hsp20/alpha crystallin family protein, putative, expressed	S3(Phospho); M9(Oxidation)	1469.76	0	3.57632e+08	2.54367e+08				3.45134e+08	3.6538e+08	3.62382e+08	2.69083e+08	2.05427e+08	2.88591e+08	1	S(3): 100.0; T(7): 0.0	0	7.633e-05	279.494										High	45.46	0.00240926	High	50.18	0.00073682	High	41.92	0.00544356	High	10.96		High	13.48
KRSFDEQSWSELSHR	59	2	1	LOC_Os11g07440.2	plant neutral invertase domain containing protein, expressed	S3(Phospho)	1971.88	0	2.35143e+08	3.48594e+08			2.3901e+08	2.54191e+08	2.42608e+08	2.0863e+08	4.31447e+08	2.86202e+08	3.28131e+08	1	S(3): 100.0; S(8): 0.0; S(10): 0.0; S(13): 0.0	0	1.678e-08	428.644	High	43.75	0.00753782	High	27.61	0.306797	High	38.48	0.0251244	High	36.9	0.036149	High	46.25	0.00421037	High	40.79	0.0150229	High	35.05		High	29.02		High
KRSQDCLLAPDDLVGIEDNR	11	1	1	LOC_Os11g12340.1	disease resistance protein RPM1, putative, expressed	S3(Phospho); C6(Carbamidomethyl)	2394.12	6.13412e+07	0	9.76773e+07	6.50494e+07	5.7105e+07	6.18693e+07				1.00611e+08	9.04962e+07	1.01925e+08	1	S(3): 100.0	0	3.772e-09	435.167	High	34.67	0.0625918	High	41.94	0.011608	High	61.44	0.000131392										High	44.98	0.00559924	High	50.17	0.00165926	High
KRTPEADPSR	13	3	1	LOC_Os01g36860.1	DEAD-box ATP-dependent RNA helicase 40, putative, expressed	T3(Phospho)	1236.57	4.43149e+07	1.17989e+08	1.34294e+08	39999995	4.35834e+07	4.93612e+07		1.80604e+08	1.73364e+08	1.11937e+08	1.71621e+08	1.19326e+08	1	T(3): 100.0; S(9): 0.0	0	0.0001071	278.733				High	36.43	0.0177458				High	17.48		High	48.58	0.00107682	High	41.43	0.00572322	High	39.44	0.00887349	High	36.37	0.0179926	High
KRTPTLEDDR	16	1	1	LOC_Os06g41730.1	ARID/BRIGHT DNA-binding domain-containing protein, putative, expressed	T3(Phospho)	1310.61	4.38472e+07	3.72533e+07	0		5.91124e+07	7.24293e+07		6.92368e+07	4.2523e+07			5.31945e+07	0.999996	T(3): 100.0; T(5): 0.0	0	0.001046	149.02				High	52.45	0.000525336	High	29.44	0.105458	High	22.86		High	48.57	0.00128779	High	36.04	0.0230344	High	21.66		High	35.71	0.0250408	High
KSASFAFR	12	1	1	LOC_Os05g03760.1	zinc finger family protein, putative, expressed	S4(Phospho)	993.461	1.58944e+08	0	7.22326e+07	160845024	1.5819e+08	1.57797e+08				1.20526e+08	9.61713e+07		0.999999	S(2): 0.0; S(4): 100.0	0	0.007398	195.524				High	19.38	0.726099													High	35.69	0.0163483	High	38.63	0.00860228	High
KSNQATEDQVKGSPR	25	2	1	LOC_Os03g28300.2	protein kinase domain containing protein, expressed	S13(Phospho)	1724.8	8.87974e+07	0	0	120346055	1.46046e+08					1.61852e+08			1	S(2): 0.0; T(6): 0.0; S(13): 100.0	0	8.407e-06	429.644	High	27.3	0.269072	High	18.3	2.11956				High	29.35		High	34.08		High	24.68		High	50.15	0.00139015	High	46.81	0.00301209	High
KSPAATAAVGSPR	4	1	1	LOC_Os11g47770.1	selT/selW/selH selenoprotein domain containing protein, expressed	S11(Phospho)	1292.64	1.74225e+08	0	0	2.03986e+08	9.74834e+07	2.21206e+08							1	S(2): 0.0; T(6): 0.0; S(11): 100.0	0	1.392e-05	420.853																			High	67.82	2.50355e-05	High	68.74	2.01692e-05	High
KSPEQAAAGQFV	16	1	1	LOC_Os02g40710.1	ammonium transporter protein, putative, expressed	S2(Phospho)	1312.6	1.47305e+08	0	6.97889e+07	2.35652e+08	2.06264e+08						1.20975e+08	8.83915e+07	1	S(2): 100.0	0	0.001144	454.062				High	23.96	0.393554													High	41.37	0.00714504	High	39.56	0.010784	High
KSPSLLDLIQMR	8	2	1	LOC_Os06g08740.2	expressed protein	S2(Phospho)	1480.77	0	0	3.41974e+06							7.01424e+06	3.24497e+06		0.5	S(2): 50.0; S(4): 50.0	0	9.426e-06	275.486																			High	23.71		High	25.49
KSSVDEAPPGK	10	1	1	LOC_Os03g52700.1	expressed protein	S3(Phospho)	1194.54	7.74524e+06	6.39851e+06	1.43894e+07	7.87039e+06	7.30227e+06	8.06306e+06	1.52232e+07		3.97231e+06	1.49397e+07	1.24828e+07	1.57455e+07	0.999999	S(2): 0.0; S(3): 100.0	0	1.022e-10	294.376										High	40.39	0.0078888	High	30		High	46.36	0.00196872	High	40.73	0.00719755	High	49.21	0.00103637	High
KTESVENMEATTGNK	41	1	1	LOC_Os08g20660.1	sucrose-phosphate synthase, putative, expressed	S4(Phospho)	1718.74	2.14686e+08	4.64819e+08	3.58733e+08	210908721	2.0812e+08	2.25028e+08	4.6573e+08	4.40183e+08	4.88546e+08	3.87014e+08	3.35237e+08	3.53948e+08	1	T(2): 0.0; S(4): 100.0; T(11): 0.0; T(12): 0.0	0	5.829e-12	630.45	High	81.45	8.11032e-07	High	100.22	1.06278e-08	High	96.79	2.33075e-08	High	124.02	4.44822e-11	High	100.2	1.07675e-08	High	113.42	5.08904e-10	High	120.8	9.32407e-11	High	114.43	4.04028e-10	High
KTESVENMEATTGNK	17	1	1	LOC_Os08g20660.1	sucrose-phosphate synthase, putative, expressed	S4(Phospho); M8(Oxidation)	1734.73	1.21747e+07	4.75616e+07	3.0781e+07	1.21508e+07	1.22849e+07	1.20883e+07	4.23641e+07	4.24075e+07	5.79132e+07	3.04764e+07	2.97388e+07	3.21278e+07	1	T(2): 0.0; S(4): 100.0; T(11): 0.0; T(12): 0.0	0	1.601e-06	420.769	High	22.94	0.620971	High	70.67	1.05116e-05	High	15.98	3.05846	High	65.43	3.45993e-05	High	77.05	2.41918e-06	High	55.25	0.00036556	High	52.1	0.000744847	High	70.26	1.15476e-05	High
KTGIEKSPVHPR	49	1	1	LOC_Os03g63140.2	nitrate-induced NOI protein, expressed	S7(Phospho)	1428.74	1.46564e+08	2.62447e+08	0		2.09817e+08	2.29875e+08	3.92513e+08	3.94828e+08		3.44961e+08			1	T(2): 0.0; S(7): 100.0	0	0.000232	415.892				High	23.29	0.571249	High	27.18	0.235358	High	38.28	0.0181061	High	34.14	0.0418437	High	30.51		High	31.81		High	34.07	0.0426607	High
KTIDHVDLLR	3	1	1	LOC_Os02g53520.1	kinesin motor domain containing protein, putative, expressed	T2(Phospho)	1289.66	1.14544e+07	0	0		2.01083e+07	1.42549e+07							1	T(2): 100.0	0	0.0004269	327.575																						High	36.82	0.0183325	High
KTTPPPVAGEAVVMGAK	23	2	1	LOC_Os01g16110.2	la domain containing protein, putative, expressed	T3(Phospho)	1732.87	4.25781e+07	6.17234e+07	9.87756e+07		6.50827e+07	6.26518e+07	5.46005e+07	7.46018e+07	5.59679e+07	1.13412e+08	1.03803e+08	7.91123e+07	0.999907	T(2): 0.0; T(3): 100.0	0	0.0003226	480.085	High	17.5	1.98456	High	47.72	0.00174876	High	39.39	0.0128084	High	49.02	0.00139475	High	35.1	0.032649	High	33.99	0.0444913	High	32.86		High	63.94	4.03847e-05	High
KVELDDWEDAAEMSTPK	7	1	1	LOC_Os07g36940.1	eukaryotic translation initiation factor 4G, putative, expressed	T15(Phospho)	2043.87	9.56327e+06	4.52902e+06	0	1.38188e+07	1.4871e+07		7.81578e+06		5.77129e+06	1.61312e+07			1	S(14): 0.0; T(15): 100.0	0	3.907e-10	453.5										High	46.93	0.00372992				High	45.82	0.00473367	High	65.63	5.01922e-05	High	50.4	0.00168768
KVSGPLDPSVSMK	24	2	1	LOC_Os08g13350.2	expressed protein	S11(Phospho)	1424.69	1.68908e+08	4.61572e+08	3.81323e+08	1.86205e+08	2.02722e+08	1.17798e+08	4.99302e+08	4.4295e+08	4.42465e+08	3.92805e+08	3.87642e+08	3.63523e+08	1	S(3): 0.0; S(9): 0.0; S(11): 100.0	0	2.061e-05	424.026	High	55.68	0.000348811	High	46.3	0.00306625	High	58.07	0.00020243	High	49.29	0.00152029	High	59.12	0.000158527	High	81.6	8.92462e-07	High	55.01	0.000412675	High	66.51	2.86344e-05	High
KVSGPLDPSVSMK	6	2	1	LOC_Os08g13350.2	expressed protein	S3(Phospho); S11(Phospho); M12(Oxidation)	1520.65	0	1.30776e+08	0				1.77223e+08		2.15104e+08				0.999999	S(3): 100.0; S(9): 0.0; S(11): 100.0	0	0.004209	382.226										High	39.24	0.0138303	High	27.04		High	56.43	0.00026539	High	25.36					High
KVSGPLDSAASK	8	1	1	LOC_Os04g51710.1	expressed protein	S3(Phospho); S11(Phospho)	1319.57	1.17973e+08	0	0	1.15961e+08	1.22624e+08	1.15336e+08							0.999995	S(3): 100.0; S(8): 0.0; S(11): 100.0	0	0.01506	274.888																			High	51.24	0.000639255	High	51.17	0.000650788	High
KYDDPSPPPR	72	2	1	LOC_Os02g13130.2	KH domain-containing protein, putative, expressed	S6(Phospho)	1251.54	7.21706e+08	0	3.82336e+08	713153208	8.52458e+08	5.99506e+08				2.37215e+08	4.2434e+08	4.85453e+08	1	Y(2): 0.0; S(6): 100.0	0	0.0005382	330.305	High	34.57	0.032697	High	40.1	0.00906876	High	44.59	0.00325468				High	17.49		High	23.35		High	43.3	0.00438034	High	47.64	0.00160995	High
KYGPDGSMSLALVPVSTAAVAASGPFSPAAAAK	2	1	1	LOC_Os09g31470.1	AT hook motif domain containing protein, expressed	S27(Phospho)	3169.6	1.17349e+07	0	0		2.1157e+07	1.40476e+07							1	Y(2): 0.0; S(7): 0.0; S(9): 0.0; S(16): 0.0; T(17): 0.0; S(23): 0.0; S(27): 100.0	0	4.398e-06	376.068																						High	34.82	0.0395037	High
LAAAQAASAAAIHPTSPR	69	1	1	LOC_Os01g57450.1	universal stress protein domain containing protein, putative, expressed	S16(Phospho)	1783.89	3.80189e+09	0	0	3830529529	3.615e+09	3.96015e+09							0.99226	S(8): 0.0; T(15): 0.8; S(16): 99.2	0	5.054e-11	566.345																			High	65.87	2.81598e-05	High	64.93	3.51253e-05	High
LAAVSPSFR	10	1	1	LOC_Os08g05480.1	OsFBX261 - F-box domain containing protein, expressed	S5(Phospho)	1027.5	5.00539e+07	2.40612e+07	5.45143e+07	5.25267e+07	4.74432e+07	5.01918e+07	3.64387e+07	3.5745e+07		6.01406e+07	5.40935e+07	4.93089e+07	0.999967	S(5): 100.0; S(7): 0.0	0	0.001519	305.765										High	48.54	0.0010021	High	35.34	0.0212878				High	45.36	0.00208407	High	31.05	0.0464859	High
LAGGAAAAIQPNSPR	125	1	1	LOC_Os05g42230.1	universal stress protein domain containing protein, putative, expressed	S13(Phospho)	1473.72	1.99848e+09	8.88322e+07	8.63358e+08	2.07464e+09	2.01414e+09	1.90667e+09	8.1036e+07	9.16638e+07	9.37967e+07	8.76028e+08	8.91177e+08	8.22868e+08	1	S(13): 100.0	0	6.621e-10	455.845	High	56.95	0.000237965	High	52.67	0.000637549	High	56.83	0.00023903	High	51.71	0.0007865	High	51.4	0.000835275	High	47.46	0.00210971	High	57.05	0.000232549	High	57.13	0.000228401	High
LAIRPSSPESLQQLIEIAR	38	2	1	LOC_Os10g40780.3	CCR4-Not complex component, Not1domain containing protein, expressed	S7(Phospho)	2201.17	8.30671e+07	2.98812e+07	2.13198e+08	3.21048e+07		2.17097e+08		4.28927e+07	4.6751e+07	2.04474e+08	2.05626e+08	2.29493e+08	0.988579	S(6): 1.1; S(7): 98.9; S(10): 0.0	0	5.173e-06	374.058				High	32.13	0.047549	High	44.33	0.00244448	High	28.47		High	35.17	0.0236125	High	45.14	0.0020408	High	34.82	0.0256931	High	30.7		High
LAPEPESEGIAPGHVSTVIK	30	1	1	LOC_Os01g72990.1	expressed protein	S16(Phospho)	2111.04	0	0	1.29428e+08				1.35472e+08			145224042	1.17218e+08	1.25843e+08	0.989558	S(7): 0.0; S(16): 99.0; T(17): 1.0	0	1.467e-06	511.518	High	20.9	1.07456	High	32.61	0.0729757	High	37.93	0.0214377	High	34.31	0.0466687	High	25.92		High	29.45		High	10.55		High	8.84		High
LASELFAR	2	1	1	LOC_Os01g03520.1	ubiquitin conjugating enzyme protein, putative, expressed	S3(Phospho)	986.474	0	7.78e+06	0				1.51412e+07	8.19882e+06					1	S(3): 100.0	0	0.02273	215.612										High	36.83	0.014763	High	31.81	0.0459774
LASENSVSFSR	13	1	1	LOC_Os03g20530.1	DUF630/DUF632 domains containing protein, putative, expressed	S8(Phospho)	1276.56	0	3.10948e+07	1.44975e+07		1.1757e+07		2.6376e+07	3.98536e+07	2.70547e+07	1.96539e+07		2.38387e+07	0.992828	S(3): 0.0; S(6): 0.7; S(8): 99.3; S(10): 0.0	0	0.001653	257.973	High	43.3	0.00393365	High	38.57	0.0116895	High	42.82	0.00447955	High	41.2	0.00641377	High	45.05	0.00265404	High	44.47	0.00303503				High	33.13	0.0417094	High
LASIDSFDSR	23	1	1	LOC_Os01g65230.1	AGC_AGC_other_PDK1_Pk61C.1 - ACG kinases include homologs to PKA, PKG and PKC, expressed	S3(Phospho)	1190.51	5.76459e+07	0	1.12583e+08	8.31463e+07	7.20766e+07	1.77148e+07	4.45701e+07			1.13648e+08	1.08754e+08	1.15346e+08	1	S(3): 100.0; S(6): 0.0; S(9): 0.0	0	0.001181	273.226	High	12.53	4.25554	High	51.43	0.000558652	High	60.73	6.56359e-05	High	43.19	0.00375391	High	28.62		High	40.48	0.00696594	High	39.63	0.0084991	High	45.07	0.00242869	High
LASINVENVEPNR	14	3	1	LOC_Os06g40640.3	fructose-bisphospate aldolase isozyme, putative, expressed	S3(Phospho)	1534.73	1.94478e+07	0	3.07725e+07	20657338	8.37144e+06	2.93145e+07				3.28737e+07	3.80801e+07	2.13637e+07	1	S(3): 100.0	0	0.0001713	313.016	High	54.08	0.0003926	High	43	0.00499182	High	58.38	0.000145066										High	35.96	0.0255541	High	56.72	0.000217389	High
LASLSLR	23	1	1	LOC_Os01g74460.1	vacuolar fusion protein MON1 homolog A, putative, expressed	S5(Phospho)	839.442	6.34416e+07	1.26648e+08	1.8883e+08		9.1986e+07	9.83388e+07	1.53831e+08	9.55406e+07	1.30572e+08	2.1757e+08	1.61353e+08	1.87567e+08	0.999971	S(3): 0.0; S(5): 100.0	0.001	0.02349	223.017	High	39.11	0.0109058	High	37.95	0.0142448	High	40.8	0.00739022	High	53.83	0.000367839	High	53.89	0.000362792	High	53.71	0.000378144				High	54.16	0.000291618	High
LATSQNSPVR	17	1	1	LOC_Os01g26940.1	transposon protein, putative, CACTA, En/Spm sub-class, expressed	S7(Phospho)	1152.54	9.85215e+07	1.87937e+08	2.80842e+08		1.4089e+08	1.54675e+08		2.80639e+08	2.83171e+08	3.06492e+08	2.62111e+08	2.73922e+08	1	T(3): 0.0; S(4): 0.0; S(7): 100.0	0	0.002451	324.493	High	50.55	0.000813208	High	42.95	0.00465924	High	53.78	0.00038885	High	28.16		High	59.48	0.000103533	High	46.93	0.00191312				High	47.99	0.0015123	High
LDKVENSGHVEGR	13	1	1	LOC_Os09g38570.1	transcription factor like protein, putative, expressed	S7(Phospho)	1519.69	2.16077e+07	0	0	3.81766e+07	1.4004e+07	1.26426e+07					1.4725e+07		1	S(7): 100.0	0	4.193e-06	380.771							High	21.82	0.78064	High	8.71		High	14.15					High	43.78	0.0054862	High	43.85	0.00546441	High
LDVLEESMGSPKEDNK	50	1	1	LOC_Os05g38950.2	TBC domain containing protein, expressed	S10(Phospho)	1870.82	2.83864e+08	9.85504e+07	1.86474e+08	3.22316e+08	2.82467e+08	2.46809e+08	3.76744e+07	1.54996e+08	1.02981e+08	8.12791e+07	2.46778e+08	2.31366e+08	1	S(7): 0.0; S(10): 100.0	0	1.15e-08	621.825	High	69.75	1.50414e-05	High	61.72	9.56636e-05	High	59.74	0.000144975	High	58.16	0.000216991	High	55.1	0.000432178	High	57.43	0.000247312	High	71.37	1.01468e-05	High	68.84	1.81035e-05	High
LDVLEESMGSPKEDNK	21	1	1	LOC_Os05g38950.2	TBC domain containing protein, expressed	M8(Oxidation); S10(Phospho)	1886.81	0	2.63228e+07	3.40671e+07		2.876e+07			3.15107e+07	4.74577e+07	3.31833e+07	3.03684e+07	3.86495e+07	1	S(7): 0.0; S(10): 100.0	0	6.114e-08	499.383	High	47.27	0.0028003	High	35.46	0.0453834	High	48.16	0.00226996				High	45.07	0.00467224	High	43.11	0.0072687	High	34.07		High	43.43	0.00722675	High
LDYTTDDDFSSAASPPHSDVAQVGR	8	2	1	LOC_Os03g10880.2	BTBN5 - Bric-a-Brac, Tramtrack, Broad Complex BTB domain with non-phototropic hypocotyl 3 NPH3 and coiled-coil domains, expressed	S14(Phospho)	2731.16	7.59012e+07	0	2.83331e+07	9.03868e+07	8.86424e+07	4.86745e+07	5.51374e+07			4.97078e+07	3.52915e+07		1	Y(3): 0.0; T(4): 0.0; T(5): 0.0; S(10): 0.0; S(11): 0.0; S(14): 100.0; S(18): 0.0	0	4.063e-11	535.899										High	56.37	0.000354778							High	96.02	3.9693e-08	High	79.37	1.83648e-06	High
LEHPDSIEQDKESEDEIDAK	17	1	1	LOC_Os03g58590.1	expressed protein	S13(Phospho)	2407.03	1.3102e+08	3.66899e+08	1.14566e+08	1.3611e+08	1.2925e+08	1.27701e+08	3.86525e+08	3.72851e+08	3.41321e+08	1.64506e+08		1.79194e+08	1	S(6): 0.0; S(13): 100.0	0	4.692e-06	448.734	High	31.03	0.14661	High	41.59	0.0131439	High	46.29	0.00441496	High	57.07	0.000368915	High	47.08	0.0037218	High	65.48	5.38389e-05	High	41.98	0.0119928	High	46.32	0.00438807	High
LELSAVPSSYYSGQLDPDR	17	1	1	LOC_Os04g56290.2	aldose 1-epimerase, putative, expressed	S12(Phospho)	2176.99	2.12391e+08	7.10752e+07	1.36676e+08	2.05094e+08	1.92849e+08	2.39229e+08	8.03901e+07	6.70761e+07	6.57593e+07	1.26429e+08	1.39289e+08	1.44309e+08	0.999893	S(4): 0.0; S(8): 0.0; S(9): 0.0; Y(10): 0.0; Y(11): 0.0; S(12): 100.0	0	5.163e-07	460.072	High	35.65	0.0442711	High	55.17	0.000518319	High	53.4	0.000751224	High	58.77	0.000225392	High	38.72	0.0217461	High	35.77	0.0434619	High	64.08	6.41565e-05	High	62.93	8.65353e-05	High
LESDLSAVEASHVHEAELK	9	1	1	LOC_Os03g01710.1	expressed protein	S3(Phospho)	2144	2.2727e+08	0	0		3.44085e+08	3.37726e+08			1.29973e+08				1	S(3): 100.0; S(6): 0.0; S(11): 0.0	0	7.768e-09	387.591	High	50.42	0.00138624	High	50.55	0.0013414	High	70.01	1.51351e-05				High	25.91		High	52.76	0.000807207				High	51.55	0.00106481	High
LFGDTAAASESDEPAK	42	1	1	LOC_Os07g39350.1	transporter family protein, putative, expressed	S9(Phospho)	1688.71	3.11539e+08	9.70021e+08	5.58337e+08	3.1649e+08	3.00197e+08	3.1793e+08	8.45076e+08	1.073e+09	9.91984e+08	5.76728e+08	5.64758e+08	5.33526e+08	0.999952	T(5): 0.0; S(9): 100.0; S(11): 0.0	0	1.226e-08	537.424	High	98.08	2.12934e-08	High	106.88	2.72702e-09	High	114.13	5.16766e-10	High	110.33	1.23222e-09	High	120.91	1.08061e-10	High	117.51	2.3579e-10	High	99.07	1.65627e-08	High	96.82	2.77432e-08	High
LFGDTAAASESDEPAK	10	1	1	LOC_Os07g39350.1	transporter family protein, putative, expressed	S9(Phospho); S11(Phospho)	1768.67	0	0	2.76346e+07					2.60431e+07		3.06147e+07	5.22891e+07		1	T(5): 0.0; S(9): 100.0; S(11): 100.0	0	9.476e-06	402.668										High	36.9	0.0168954	High	34.63	0.0281334	High	13.55		High	39.37	0.00952058
LFGDTAAASESDEPAKEK	27	1	1	LOC_Os07g39350.1	transporter family protein, putative, expressed	S9(Phospho)	1945.84	2.56089e+07	1.31489e+08	1.01458e+08	4.46527e+07	3.21739e+07		1.30622e+08	1.31769e+08	1.32075e+08	1.06867e+08	9.61375e+07	1.0137e+08	0.999917	T(5): 0.0; S(9): 100.0; S(11): 0.0	0	1.837e-10	489.583	High	60.11	0.000122751	High	52.84	0.000657795	High	51.76	0.000831175	High	64.34	4.6145e-05	High	69.34	1.44119e-05	High	66.68	2.69016e-05	High	44.45	0.00464266	High	49.16	0.0015222	High
LFLFPAKPESSSSLGSLLDDSSK	37	1	1	LOC_Os01g04650.1	PB1 domain containing protein, expressed	S10(Phospho)	2505.23	4.51693e+07	0	9.28742e+07	4.52082e+07	4.2134e+07	4.81658e+07	2.25136e+07			7.96293e+07	9.4242e+07	1.04751e+08	0.974468	S(10): 97.4; S(11): 1.3; S(12): 1.3; S(13): 0.0; S(16): 0.0; S(21): 0.0; S(22): 0.0	0	2.572e-10	445.442	High	47.54	0.00254341	High	45.52	0.00404263	High	40.06	0.0145032	High	54.23	0.000546158							High	87.05	2.84029e-07	High	56.87	0.000303038	High
LFQFGIDGSKEPFVNIPEDR	13	1	1	LOC_Os09g05020.1	tyrosine phosphatase family protein, putative, expressed	S9(Phospho)	2388.14	1.67881e+07	0	0	3.01096e+07	9.93596e+06	1.03187e+07						4.9047e+06	1	S(9): 100.0	0	1.428e-06	368.054	High	31.39	0.106738	High	17.5	2.61318	High	26.8	0.311723							High	22.66		High	35.72	0.0399732	High	37.14	0.0303416	High
LGANKFSER	30	1	1	LOC_Os04g47220.1	aquaporin protein, putative, expressed	S7(Phospho)	1101.51	3.10729e+08	8.42075e+08	6.27272e+08	3.17961e+08	3.0001e+08	3.14216e+08	8.57262e+08	8.283e+08	8.40662e+08	6.68847e+08	5.97678e+08	6.15293e+08	1	S(7): 100.0	0	0.006898	321.031	High	56.45	0.000146862	High	52.85	0.000336442	High	47.77	0.0010837	High	69.08	7.82973e-06	High	63.46	2.85592e-05	High	62.96	3.2044e-05	High	64.46	2.33121e-05	High	64.85	2.39941e-05	High
LGIPAAAAAAGASSAASADGASPR	18	1	1	LOC_Os03g25720.1	GA20734-PA, putative, expressed	S22(Phospho)	2090.99	1.36895e+08	0	0	1.76884e+08	2.30909e+08	2.8928e+06							1	S(13): 0.0; S(14): 0.0; S(17): 0.0; S(22): 100.0	0	5.163e-06	440.793																			High	44.29	0.00578697	High	36.82	0.0325888	High
LGLGGLGGSPR	25	2	1	LOC_Os10g41400.2	peptide methionine sulfoxide reductase, putative, expressed	S9(Phospho)	1063.53	6.63995e+08	2.58201e+08	5.73035e+08	6.74498e+08	6.05066e+08	7.1242e+08	3.0756e+08	2.57743e+08	2.093e+08	6.29326e+08	5.30286e+08	5.59493e+08	1	S(9): 100.0	0	2.786e-05	555.816	High	51.67	0.000536787	High	59.39	9.06831e-05	High	57.4	0.000143483	High	54.26	0.000314415	High	50.99	0.000661608	High	56.85	0.000172769	High	86.04	1.96122e-07	High	72.84	4.09757e-06	High
LGLPEAEEDMFADSPKDK	27	2	1	LOC_Os09g20590.2	CD2-binding protein-related, putative, expressed	S14(Phospho)	2071.9	1.27926e+08	0	1.31114e+08	127779064	1.30042e+08	1.25957e+08	1.24329e+08			1.33132e+08	1.35632e+08	1.2458e+08	1	S(14): 100.0	0	2.404e-08	522.416	High	38.44	0.0281425	High	50.57	0.00171585	High	43.97	0.00784897	High	54.15	0.000750146	High	28.18		High	16.51		High	38.88	0.0255215	High	48.19	0.0029939	High
LGNTLMQDPGMSSMLESLTSPSHK	25	4	1	LOC_Os09g33810.2	ankyrin repeat domain containing protein, putative, expressed	S22(Phospho)	2641.19	2.70038e+08	0	1.26948e+08	1.79471e+08	2.03374e+08	4.2727e+08				2.34239e+08		1.46606e+08	0.49733	T(4): 0.0; S(12): 0.0; S(13): 0.0; S(17): 0.0; T(19): 0.5; S(20): 49.7; S(22): 49.7	0	1.862e-10	500.255	High	30.82	0.152548	High	51.31	0.00136235	High	48.92	0.00241142	High	21.83		High	26.03		High	11.47		High	78.53	2.81404e-06	High	75.7	5.36423e-06	High
LGSAAYSWDTASSHR	5	1	1	LOC_Os03g59360.1	remorin, putative, expressed	S3(Phospho)	1688.71	0	0	7.2982e+07							8.35945e+07	6.45874e+07	7.07641e+07	1	S(3): 100.0; Y(6): 0.0; S(7): 0.0; T(10): 0.0; S(12): 0.0; S(13): 0.0	0	3.816e-16	355.849				High	36.8	0.0277354	High	32.92	0.06828
LGSFIMR	11	2	1	LOC_Os06g19370.2	cadmium tolerance factor, putative, expressed	S3(Phospho)	903.418	6.56658e+06	2.32406e+07	1.95807e+07	1.11984e+07		8.50138e+06	2.31685e+07	2.48764e+07	2.16768e+07	1.94541e+07	2.04684e+07	1.88197e+07	1	S(3): 100.0	0	0.02038	262.577				High	43.23	0.00268564	High	39.62	0.00610661	High	45.64	0.00154187	High	40.96	0.00476998	High	36.75	0.0125858	High	38.93	0.00761872				High
LGSFTFR	33	1	1	LOC_Os04g31340.1	CBS domain containing membrane protein, putative, expressed	S3(Phospho)	907.408	1.30036e+09	3.09995e+09	3.46103e+09	1.34881e+09	1.28606e+09	1.2662e+09	3.6025e+09	2.82249e+09	2.87486e+09	3.62773e+09	3.29696e+09	3.45839e+09	0.5	S(3): 50.0; T(5): 50.0	0	0.00825	218.982	High	37.1	0.00914477	High	36.29	0.011196	High	35.74	0.0125076	High	34.81	0.0155274	High	39.87	0.00484281	High	36.15	0.0114051	High	35.66	0.012971	High	37.03	0.00946179	High
LGSISLTK	13	1	1	LOC_Os02g14530.1	protein kinase domain containing protein, expressed	S5(Phospho)	898.467	0	0	1.75637e+07							2.75691e+07	2.51218e+07		0.999892	S(3): 0.0; S(5): 100.0; T(7): 0.0	0	0.008347	204.739	High	22.33	0.574264							High	32.37		High	27.96		High	31.89		High	27.68		High	29.85		High
LGSPLPASWFSGR	8	1	1	LOC_Os03g55704.1	expressed protein	S3(Phospho)	1454.69	0	0	7.48049e+06			1.36563e+07				1.71285e+07		5.31297e+06	1	S(3): 100.0; S(8): 0.0; S(11): 0.0	0	0.000125	237.606																			High	26.28		High	19.65		High
LGSPPLPPPR	49	1	1	LOC_Os07g42220.1	expressed protein	S3(Phospho)	1110.58	0	1.48241e+07	8.24156e+06		2.11165e+07			2.25311e+07	2.1941e+07	1.24014e+07		1.23233e+07	1	S(3): 100.0	0	0.01741	281.522	High	31.75	0.0561075	High	24.55	0.295508	High	23.59	0.3673	High	40.71	0.00706943	High	33.72	0.0357742	High	38.53	0.0113628	High	33.05	0.041593	High	32.79	0.0437909	High
LGSSAYSLR	25	1	1	LOC_Os05g50280.1	transporter family protein, putative, expressed	S3(Phospho); S4(Phospho)	1113.44	5.74428e+07	3.06868e+08	4.22437e+08	1.07304e+08		6.50243e+07	4.04077e+08	3.60234e+08	1.56292e+08	5.06087e+08	3.73129e+08	3.88094e+08	1	S(3): 100.0; S(4): 100.0; Y(6): 0.0; S(7): 0.0	0	0.004537	319.817	High	41.22	0.00315251	High	44.17	0.00166529	High	43.28	0.00204404	High	59.17	4.83634e-05	High	63.26	1.97558e-05	High	63.13	1.94563e-05	High	38.56	0.00606023	High	27.59		High
LGSSAYSLR	5	1	1	LOC_Os05g50280.1	transporter family protein, putative, expressed	S3(Phospho)	1033.47	0	6.11236e+07	0					8.91921e+07	9.41785e+07	9.83628e+07			0.992988	S(3): 99.3; S(4): 0.7; Y(6): 0.0; S(7): 0.0	0	0.0002233	240.56													High	52.11	0.000396481	High	45.26	0.00191965	High	25.66
LHPADSIEGTVIDR	50	3	1	LOC_Os07g05610.4	zinc ion binding protein, putative, expressed	S6(Phospho)	1602.76	0	1.19837e+07	0				3.40299e+06	1.19301e+07	2.0618e+07		5.31044e+07		1	S(6): 100.0; T(10): 0.0	0	0.001372	332.962	High	47.72	0.00247058	High	43.53	0.00654766	High	42.27	0.00867746	High	37.28	0.0276674	High	47.69	0.00250643	High	45.84	0.00382583	High	23.91		High	29.04		High
LIDTDTDACLDR	15	1	1	LOC_Os08g02690.1	MA3 domain containing protein, expressed	T4(Phospho); C9(Carbamidomethyl)	1487.61	2.50864e+07	0	4.99274e+07	3.55024e+07	3.97568e+07					5.20454e+07	4.72475e+07	5.04892e+07	1	T(4): 100.0; T(6): 0.0	0	5.273e-07	370.679	High	69.57	9.0424e-06	High	69.45	9.30709e-06	High	69.43	9.31014e-06	High	49.54	0.00091162	High	29.51		High	30.8		High	69.7	8.91504e-06	High	71.56	5.78486e-06	High
LLAHLGFNPPQEQTSSSTDELNR	14	1	1	LOC_Os07g46370.1	WD domain, G-beta repeat domain containing protein, expressed	S16(Phospho)	2634.23	0	0	1.29016e+08							1.68864e+08	9.73285e+07	1.20855e+08	0.333333	T(14): 0.0; S(15): 0.0; S(16): 33.3; S(17): 33.3; T(18): 33.3	0	1.546e-09	401.386	High	55.01	0.000618065	High	49.93	0.00198423	High	56.27	0.000430787
LLDFIAEPHAMADSGHSDDQGSNSR	8	1	1	LOC_Os03g40010.1	DEK C terminal domain containing protein, expressed	S14(Phospho)	2750.16	0	0	5.48344e+07							8.11373e+07	8.33658e+07		0.982965	S(14): 98.3; S(17): 1.7; S(22): 0.0; S(24): 0.0	0	5.988e-07	372.154	High	11.68	11.8147	High	23.34	0.819142																High	15.21		High
LLDLSPDTFFSVHADAEDGSPR	11	1	1	LOC_Os04g55960.1	NADPH reductase, putative, expressed	S20(Phospho)	2469.11	2.24685e+07	0	0		7.87923e+06	5.95261e+07							1	S(5): 0.0; T(8): 0.0; S(11): 0.0; S(20): 100.0	0	4.832e-06	424.825																			High	32.64		High	40.46	0.0180124	High
LLGDLGGIFSK	12	3	1	LOC_Os02g24080.5	SNARE domain containing protein, putative, expressed	S10(Phospho)	1199.62	0	0	8.23587e+06			1.53159e+07				1.18444e+07	1.28632e+07		1	S(10): 100.0	0	3.816e-16	280.919	High	37.66	0.0129147	High	41.24	0.00566348	High	27.56	0.126981										High	22.49		High	19.84		High
LLISPSLSSPTFSTSSPSR	7	1	1	LOC_Os11g32470.1	NEF1, putative, expressed	S6(Phospho)	2044	3.14687e+07	0	1.84311e+07	3.37038e+07	3.01314e+07	3.0571e+07	2.14504e+06			3.07844e+07		2.45089e+07	1	S(4): 0.0; S(6): 100.0; S(8): 0.0; S(9): 0.0; T(11): 0.0; S(13): 0.0; T(14): 0.0; S(15): 0.0; S(16): 0.0; S(18): 0.0	0	5.627e-09	488.7										High	44.71	0.00588402							High	61.39	0.00010917	High	65.09	4.60586e-05	High
LLLSPTSK	13	1	1	LOC_Os05g31490.1	golgi transport complex protein-related, putative, expressed	T6(Phospho)	938.498	1.2563e+08	0	1.7278e+08	1.78436e+08		1.98455e+08				2.86618e+08		2.31723e+08	0.992292	S(4): 0.0; T(6): 99.2; S(7): 0.8	0.001	0.02526	202.67	High	48.72	0.00115545				High	16.96	1.70361										High	41.42	0.006252				High
LLLTPAGGTDNDGEGTVERPSK	24	1	1	LOC_Os05g14940.1	transposon protein, putative, unclassified, expressed	T9(Phospho)	2307.09	3.31664e+09	1.69364e+08	4.75659e+09	5.31115e+09	4.63876e+09		1.42775e+07	4.93815e+08		7.69727e+09	5.68356e+09	8.88951e+08	1	T(4): 0.0; T(9): 100.0; T(16): 0.0; S(21): 0.0	0	1.426e-06	454.051	High	49.54	0.00173875	High	30.52	0.13915	High	46.81	0.00328203	High	50.87	0.00129113	High	45.66	0.00425938	High	30		High	48.49	0.0022235	High	45.42	0.00450282	High
LLPLFPVTSPR	29	2	2	LOC_Os01g54400.1 ;LOC_Os05g44270.1	VQ domain containing protein, putative, expressed	T8(Phospho)	1319.72	1.2873e+08	0	0	1.72181e+08	2.1401e+08				1.16829e+08				0.5	T(8): 50.0; S(9): 50.0	0	0.001018	378.124	High	30.87	0.0707972	High	29.62	0.094355	High	40.09	0.00890846	High	30.01		High	31.53		High	33.5	0.0375884	High	36.84	0.0174202	High	39.74	0.00947032	High
LLSHSFK	12	1	1	LOC_Os03g57430.1	expressed protein	S5(Phospho)	911.441	4.45314e+08	0	4.05173e+08	445328215	4.24373e+08	4.6624e+08				4.35441e+08	3.68935e+08	4.11144e+08	1	S(3): 0.0; S(5): 100.0	0.001	0.03039	278.583	High	31.22	0.0571227	High	38.06	0.0117627	High	51.03	0.000593617										High	51.92	0.000483944	High	45.47	0.00213553	High
LLSLGPDDYEK	14	1	1	LOC_Os07g43030.1	calmodulin-binding transcription activator, putative, expressed	S3(Phospho)	1329.61	2.59241e+07	3.00027e+07	6.51461e+07		3.95135e+07	3.82588e+07	4.93242e+07	3.79306e+07	2.75332e+06	6.95993e+07	6.58326e+07	6.00065e+07	1	S(3): 100.0; Y(9): 0.0	0	1.184e-10	353.074	High	45.66	0.00227502	High	42.77	0.00451556	High	45.57	0.00232266	High	58.44	0.000122022	High	42.41	0.00489434	High	40.11	0.00829229	High	30.72		High	48.79	0.00110196	High
LLSPVLSLPTPNK	6	1	1	LOC_Os12g40190.1	G-protein alpha subunit, putative, expressed	S7(Phospho)	1458.8	0	7.5273e+06	0				1.69547e+07		5.62724e+06				0.5	S(3): 0.0; S(7): 50.0; T(10): 50.0	0.001	0.01096	258.033										High	35.7	0.0180064				High	32.1	0.0412502
LLSSGHLHGDLGNNIENSPAR	20	6	1	LOC_Os02g38050.6	joka2, putative, expressed	S3(Phospho)	2281.08	6.67935e+07	1.37316e+08	0	95182054	9.94286e+07	5.76975e+06	1.6448e+08	8.73265e+07	1.60143e+08				0.999996	S(3): 100.0; S(4): 0.0; S(18): 0.0	0	8.053e-06	400.296	High	41.69	0.0123263	High	45.08	0.00564719	High	53.01	0.000910313	High	58.97	0.000229318	High	59.89	0.000186105	High	38.83	0.0236373	High	44.97	0.00579842	High	48.34	0.0026695	High
LMEDLSLER	14	3	1	LOC_Os08g01270.3	protein kinase family protein, putative, expressed	S6(Phospho)	1185.52	3.0196e+07	2.74015e+07	0	3.17049e+07	2.62984e+07	3.25846e+07	4.51554e+07	3.7049e+07					1	S(6): 100.0	0	1.747e-06	245.465	High	29.78	0.105144	High	25.67	0.268173	High	30.15	0.0961221	High	35.02	0.0310683	High	33.27	0.0466032	High	29.18		High	39.99	0.00999799	High	38.74	0.0132657	High
LMQPQSSSCNSTEIDK	5	2	1	LOC_Os02g57120.1	HEAT repeat family protein, putative, expressed	S7(Phospho); C9(Carbamidomethyl)	1904.79	8.05619e+06	0	0		1.19043e+07	1.22643e+07							0.988034	S(6): 0.0; S(7): 98.8; S(8): 1.2; S(11): 0.0; T(12): 0.0	0	3.742e-05	326.256				High	26.52	0.247356																High	36.44	0.0271476	High
LNFPLAASALQDSSTTGSSPLHPTVAAK	16	1	1	LOC_Os08g01900.1	armadillo/beta-catenin repeat family protein, putative, expressed	S19(Phospho)	2861.43	2.57341e+08	0	0	2.93527e+08	2.22149e+08	2.56348e+08							0.495768	S(8): 0.0; S(13): 0.0; S(14): 0.0; T(15): 0.0; T(16): 0.8; S(18): 49.6; S(19): 49.6; T(24): 0.0	0	1.39e-10	375.568																			High	61.73	9.31943e-05	High	51.36	0.00113656	High
LNHLVSCDQTEVLEPK	37	1	1	LOC_Os01g56140.1	expressed protein	S6(Phospho); C7(Carbamidomethyl)	1961.91	7.16232e+07	2.90621e+07	9.90227e+07	6.75405e+07	7.85884e+07	6.87408e+07	3.44672e+07		5.27192e+07	1.10424e+08	1.03212e+08	8.34318e+07	1	S(6): 100.0; T(10): 0.0	0	2.999e-07	528.342	High	42.74	0.00774484	High	28.54	0.205669	High	42.47	0.00822463	High	40.54	0.0129857	High	32.14		High	40.02	0.0144881	High	47.71	0.00246187	High	49.82	0.00151709	High
LNPAVDDGGSFK	22	1	1	LOC_Os12g36830.1	pathogenesis-related Bet v I family protein, putative, expressed	S10(Phospho)	1299.57	0	0	1.80493e+08								2.443e+08	2.9718e+08	1	S(10): 100.0	0	0.004585	379.101	High	39.82	0.00867729	High	34.61	0.029353	High	32.82	0.043594	High	18.68		High	9.37		High	20.26		High	30.26		High	16.03		High
LNSLLNYK	15	1	1	LOC_Os05g46340.1	expressed protein	S3(Phospho)	1044.51	0	0	8.40128e+07						1.32443e+08	1.31949e+08		1.2009e+08	1	S(3): 100.0; Y(7): 0.0	0	0.001147	257.813	High	30.64	0.108649	High	26.47	0.282907	High	28.35	0.182626	High	27.3		High	28.79		High	47.36	0.00229384
LPAGSLHSESR	2	1	1	LOC_Os02g25900.1	pollen signalling protein with adenylyl cyclase activity, putative, expressed	S5(Phospho)	1233.57	1.19947e+07	0	0	1.8757e+07		1.7227e+07							0.999721	S(5): 100.0; S(8): 0.0; S(10): 0.0	0	1.439e-05	256.117																			High	46.34	0.00263398				High
LPGGLVTPTPK	21	1	1	LOC_Os02g05310.4	splicing factor 3B subunit 1, putative, expressed	T7(Phospho)	1159.62	0	1.10104e+07	0					1.79229e+07	1.51082e+07		8.19179e+06		0.990216	T(7): 99.0; T(9): 1.0	0	0.01698	308.323				High	34.88	0.0266572	High	28.35	0.121872	High	17.1		High	37.88	0.0132706	High	36.26	0.018395	High	28.84		High	21.28
LPLDVENSSPSTENNTDSITAEKPSPSK	25	1	1	LOC_Os03g09840.1	C2 domain containing protein, putative, expressed	S27(Phospho)	3037.39	2.78353e+08	4.75193e+07	1.70519e+08	2.68662e+08	2.50335e+08	3.16063e+08		1.1638e+08	2.61781e+07	1.86146e+08	1.79851e+08	1.45558e+08	0.5	S(8): 0.0; S(9): 0.0; S(11): 0.0; T(12): 0.0; T(16): 0.0; S(18): 0.0; T(20): 0.0; S(25): 50.0; S(27): 50.0	0	2.552e-16	552.665	High	51.78	0.00133014	High	61.74	0.000133809	High	59.67	0.000211096	High	32.71		High	43.98	0.00750496	High	46.49	0.00430264	High	79.95	1.97511e-06	High	68.02	3.08423e-05	High
LPNFSGIFSK	12	1	1	LOC_Os12g17900.1	armadillo/beta-catenin repeat family protein, putative, expressed	S5(Phospho)	1189.57	9.14662e+06	2.88719e+06	1.92487e+07	1.05583e+07	7.90891e+06	8.97263e+06	2.39033e+06	6.27123e+06		2.04191e+07	1.8451e+07	1.88759e+07	1	S(5): 100.0; S(9): 0.0	0	5.493e-06	372.89	High	39.13	0.0102204	High	48.69	0.00115737	High	43.42	0.00395157	High	36.97	0.0172983	High	42.15	0.0051384				High	50.9	0.000692532	High	52.23	0.000520319	High
LPPLPGISIPTDISVASESLGSPR	12	1	1	LOC_Os05g31920.2	FYVE zinc finger domain containing protein, expressed	S22(Phospho)	2483.3	2.00921e+07	0	0	2.47169e+07	2.4007e+07	1.15525e+07					1.92101e+07		1	S(8): 0.0; T(11): 0.0; S(14): 0.0; S(17): 0.0; S(19): 0.0; S(22): 100.0	0	6.905e-07	419.049										High	5.83								High	43.83	0.00245502	High	58.22	0.000105538	High
LPPPPPSPVSPTDSGIAASPFK	67	1	1	LOC_Os01g42830.1	adaptin ear-binding coat-associated protein 2, putative, expressed	S7(Phospho); S10(Phospho)	2319.07	1.32744e+08	0	9.01681e+07	56674490	1.63311e+08	1.78247e+08	2.07721e+07			1.5645e+08	9.89165e+07	1.51379e+07	1	S(7): 100.0; S(10): 100.0; T(12): 0.0; S(14): 0.0; S(19): 0.0	0	1.913e-07	408.652	High	22.32	1.28188	High	50.27	0.00205283	High	34.03	0.0863481	High	44.97	0.00689697	High	31.21		High	32.04		High	77.85	3.58469e-06	High	72.17	1.31783e-05	High
LPPPPPSPVSPTDSGIAASPFK	99	1	1	LOC_Os01g42830.1	adaptin ear-binding coat-associated protein 2, putative, expressed	S10(Phospho)	2239.11	5.40208e+08	1.79587e+08	5.32712e+08	555087344	3.99001e+08	6.66535e+08	1.38437e+08	2.19194e+08	1.8113e+08	7.19088e+08	4.53133e+08	4.25915e+08	0.999938	S(7): 0.0; S(10): 100.0; T(12): 0.0; S(14): 0.0; S(19): 0.0	0	1.852e-08	665.12	High	86.87	3.61837e-07	High	77.37	3.24594e-06	High	71.54	1.23491e-05	High	68.64	2.41267e-05	High	59.7	0.000188427	High	84.4	6.76414e-07	High	84.84	5.67277e-07	High	90.11	1.69892e-07	High
LPSTAPALPSAPANPSGR	57	1	1	LOC_Os10g42439.1	heat shock protein DnaJ, putative, expressed	S3(Phospho)	1783.88	4.01031e+08	5.46503e+07	2.98182e+08	279896968	4.21931e+08	5.01265e+08	5.94868e+07	6.12105e+07	4.32538e+07	2.90319e+08	3.09775e+08	2.94453e+08	0.999999	S(3): 100.0; T(4): 0.0; S(10): 0.0; S(16): 0.0	0	3.816e-16	444.866	High	46.69	0.00312862	High	53.76	0.000494775	High	53.05	0.00058587	High	40.82	0.00979042	High	46.22	0.00278299	High	43.44	0.00533287	High	67.03	2.33028e-05	High	64.5	4.19389e-05	High
LQEQLSGNLAR	15	1	1	LOC_Os01g69990.1	GYF domain containing protein, putative, expressed	S6(Phospho)	1308.63	2.13545e+08	0	0	221040501	2.02106e+08	2.17489e+08						1.5843e+08	1	S(6): 100.0	0	2.611e-05	249.199	High	50.5	0.000884121	High	33.91	0.0405427	High	47.73	0.00167053	High	27.62		High	18.87					High	33.76	0.0412733	High	39.46	0.0111032	High
LQGSAVTDGAETPPEK	14	1	1	LOC_Os05g03190.1	IQ calmodulin-binding motif domain containing protein, expressed	S4(Phospho)	1679.76	3.65966e+07	0	3.73889e+07	3.97807e+07	4.1074e+07	2.89352e+07				3.82738e+07	3.55022e+07	3.83908e+07	1	S(4): 100.0; T(7): 0.0; T(12): 0.0	0	1.836e-06	376.399	High	49.97	0.00141323	High	81.04	1.10462e-06	High	22.16	0.823111										High	69.75	1.4623e-05	High	67.9	2.28108e-05	High
LQGSTGTSSPTIHYVDTQDTAE	27	1	1	LOC_Os07g46340.1	methyltransferase, putative, expressed	T5(Phospho)	2388.03	3.87606e+07	0	5.68705e+07	5.94324e+07		5.68495e+07				6.09028e+07	5.11174e+07	5.85913e+07	0.981426	S(4): 1.8; T(5): 98.1; T(7): 0.0; S(8): 0.0; S(9): 0.0; T(11): 0.0; Y(14): 0.0; T(17): 0.0; T(20): 0.0	0	4.066e-07	329.502	High	24.98	0.503693	High	12.69	8.52888	High	33.77	0.0663639	High	33.21		High	20.58					High	39.55	0.0176414	High	20.78		High
LQHADSIEGSVIDR	34	1	1	LOC_Os03g57160.1	zinc ion binding protein, putative, expressed	S6(Phospho)	1619.74	1.10148e+08	3.42401e+08	2.39884e+08	1.06726e+08	1.05384e+08	1.18335e+08	3.43805e+08	3.31669e+08	3.5173e+08	2.65009e+08	2.16357e+08	2.38288e+08	1	S(6): 100.0; S(10): 0.0	0	3.019e-07	455.095	High	54.75	0.000467109	High	67.3	2.61251e-05	High	64.38	5.02996e-05	High	67.71	2.35767e-05	High	68.57	1.9501e-05	High	64.24	5.30587e-05	High	44.34	0.00535628	High	44.18	0.00533958	High
LQHADSIEGSVIDR	6	1	1	LOC_Os03g57160.1	zinc ion binding protein, putative, expressed	S6(Phospho); S10(Phospho)	1699.71	0	2.69914e+07	0				3.51559e+07	1.84934e+07	2.73251e+07			9.2857e+06	1	S(6): 100.0; S(10): 100.0	0	0.006518	422.336				High	42.87	0.00662304				High	45.92	0.0031445	High	38.04	0.0200457	High	43.92	0.00497559
LQIWQYGDVESDEEEQAPAAR	35	1	1	LOC_Os02g32350.1	TUDOR protein with multiple SNc domains, putative, expressed	S11(Phospho)	2514.09	8.96601e+08	2.67891e+08	7.92257e+08	9.28957e+08	8.54151e+08	9.06694e+08	3.13418e+08	3.40749e+08	1.49506e+08	7.78398e+08	8.69945e+08	7.28429e+08	1	Y(6): 0.0; S(11): 100.0	0	5.217e-11	572.732	High	99.01	2.69167e-08	High	97.24	3.72312e-08	High	80.51	1.76017e-06	High	90.81	1.7821e-07	High	93.32	9.97751e-08	High	93.53	8.74131e-08	High	89.85	2.21986e-07	High	109.79	2.28433e-09	High
LQNPPPPAAAAQAPSTPTSPTTPTSSSSQPGPLR	6	1	1	LOC_Os03g14260.2	guanine nucleotide exchange family protein, putative, expressed	T21(Phospho)	3389.63	2.01035e+07	0	0	3.66791e+07		2.36314e+07							0.0214871	S(15): 0.0; T(16): 0.1; T(18): 0.1; S(19): 2.1; T(21): 2.1; T(22): 95.5; T(24): 0.1; S(25): 0.0; S(26): 0.0; S(27): 0.0; S(28): 0.0	0	7.113e-11	374.783																			High	46.44	0.00397113	High	54.06	0.000712847	High
LQSEKFEHLSEQELCLK	15	1	1	LOC_Os07g30774.1	calmodulin-binding transcription activator 5, putative, expressed	S3(Phospho); C15(Carbamidomethyl)	2198.03	0	1.53777e+08	0	1.22339e+08			1.61763e+08	1.34058e+08	1.6551e+08				1	S(3): 100.0; S(10): 0.0	0	2.429e-06	447.272	High	28.33	0.292757	High	43	0.0102568	High	34.16	0.0783338	High	38.64	0.0265955	High	49.21	0.0024068	High	40.1	0.0196229	High	48.19	0.00304396				High
LQSFEEEHK	26	2	1	LOC_Os06g14490.2	calmodulin-binding heat-shock protein, putative, expressed	S3(Phospho)	1226.52	2.38955e+08	3.64732e+08	0	244847426	2.39974e+08	2.32043e+08	5.08528e+08		5.85669e+08			3.50166e+08	1	S(3): 100.0	0	0.002039	294.339	High	24.18	0.275955	High	23.85	0.29774	High	33.09	0.0354681	High	43.27	0.00340517	High	29.65		High	38.46	0.0103357	High	42.16	0.00456709	High	43.49	0.00316086	High
LQSFTSFQKPIETAPNK	64	1	1	LOC_Os04g46894.1	beige/BEACH domain containing protein, expressed	S6(Phospho)	2015.99	6.03096e+08	9.78764e+07	7.26479e+08	6.89307e+08	5.19365e+08	6.00616e+08	1.18429e+08	7.82848e+07	9.69157e+07	7.16989e+08	6.38232e+08	8.24217e+08	0.999889	S(3): 0.0; T(5): 0.0; S(6): 100.0; T(13): 0.0	0	3.816e-16	356.183	High	44.41	0.00540829	High	60.3	0.000142135	High	53.13	0.000733502	High	43	0.00754788	High	37.24	0.0286691	High	37.01	0.0300194	High	51.76	0.000959535	High	52.88	0.000764084	High
LQSLAGQHTDVLEALSPNVR	14	2	1	LOC_Os06g05660.3	NAP domain containing protein, putative, expressed	S16(Phospho)	2228.11	6.61814e+07	0	9.8405e+07		9.50371e+07	1.03507e+08				9.93378e+07	9.96299e+07	9.62473e+07	1	S(3): 0.0; T(9): 0.0; S(16): 100.0	0	7.175e-06	507.756	High	34.64	0.0435803	High	35.13	0.0384088	High	42.07	0.0077174	High	23.92		High	32.01		High	18.04					High	56.06	0.000304351	High
LQSPGAQQTYGTSQQVDASAGNQGMLSPYR	3	3	1	LOC_Os01g68860.2	zinc finger C-x8-C-x5-C-x3-H type family protein, expressed	S3(Phospho)	3220.46	1.49784e+07	0	0	3.4012e+07		1.0923e+07							1	S(3): 100.0; T(9): 0.0; Y(10): 0.0; T(12): 0.0; S(13): 0.0; S(19): 0.0; S(27): 0.0; Y(29): 0.0	0	8.319e-08	328.88																			High	65.59	5.79859e-05				High
LSEDSDDEFYDVDK	7	1	1	LOC_Os05g38950.2	TBC domain containing protein, expressed	S5(Phospho)	1756.65	1.5133e+07	0	8.9518e+06	1.58911e+07	1.25568e+07	1.69511e+07				1.11806e+07	6.45038e+06	9.22445e+06	1	S(2): 0.0; S(5): 100.0; Y(10): 0.0	0	9.869e-08	274.032							High	27.47	0.107974										High	95.83	1.5242e-08	High	99.99	6.32956e-09	High
LSENTEIQSAK	5	2	1	LOC_Os04g23890.4	AGC_PVPK_like_kin82y.10 - ACG kinases include homologs to PKA, PKG and PKC, expressed	S2(Phospho)	1299.59	3.17249e+07	0	0	5.08109e+07	4.4364e+07								0.999997	S(2): 100.0; T(5): 0.0; S(9): 0.0	0	0.0001042	235.831																			High	35.55	0.0295607	High	46.22	0.00250004	High
LSETSVSPR	7	2	1	LOC_Os11g10100.2	STE_MEKK_ste11_MAP3K.3 - STE kinases include homologs to sterile 7, sterile 11 and sterile 20 from yeast, expressed	S7(Phospho)	1055.48	4.31376e+07	0	0	43871375	4.25049e+07	4.30366e+07	4.53593e+07						1	S(2): 0.0; T(4): 0.0; S(5): 0.0; S(7): 100.0	0	6.95e-05	258.448				High	49.96	0.000829101	High	49.71	0.000885177	High	50.59	0.000735478							High	44.73	0.00284521	High	76.3	1.97384e-06	High
LSHGYASSESSDSSR	8	1	1	LOC_Os07g25680.1	protein kinase domain containing protein, expressed	S7(Phospho)	1649.64	4.84817e+06	0	0		6.04413e+06	8.50037e+06				1.02116e+07			0.989068	S(2): 0.0; Y(5): 0.0; S(7): 98.9; S(8): 1.1; S(10): 0.0; S(11): 0.0; S(13): 0.0; S(14): 0.0	0	2.475e-06	332.569																			High	13.55		High	32.94	0.0462933	High
LSIDDELVSSPK	15	1	1	LOC_Os02g47860.1	uridine kinase, putative, expressed	S10(Phospho)	1382.65	0	2.0322e+07	4.59328e+07				4.04402e+07	2.05258e+07		6.19011e+07	7.33315e+07	2.56565e+06	0.999893	S(2): 0.0; S(9): 0.0; S(10): 100.0	0	0.000261	295.592	High	54.91	0.000557077	High	44.92	0.00552413	High	54.82	0.000559348	High	54.72	0.00057811	High	55.1	0.000524423
LSIQSFAR	15	1	1	LOC_Os01g72080.1	calmodulin-like protein 1, putative, expressed	S5(Phospho)	1001.48	0	4.08345e+07	6.77537e+07		4.79662e+07			5.8043e+07	6.44605e+07	7.43819e+07	6.30988e+07	6.57804e+07	1	S(2): 0.0; S(5): 100.0	0	0.001871	279.277	High	38.02	0.0115718	High	30.7	0.0622607	High	38.74	0.00972373	High	29.51		High	37.37	0.0136966	High	41.09	0.00555518	High	31.21		High	34.24	0.0276501	High
LSKSDDSLNSQFLILQSQSGVAK	39	1	1	LOC_Os07g25680.1	protein kinase domain containing protein, expressed	S4(Phospho)	2545.26	1.26096e+08	0	8.61312e+07	1.40217e+08	1.20261e+08	1.17812e+08				1.0214e+08	8.21815e+07	7.40721e+07	0.986392	S(2): 0.0; S(4): 98.6; S(7): 1.4; S(10): 0.0; S(17): 0.0; S(19): 0.0	0	1.747e-11	463.879	High	71.83	9.35663e-06	High	71.32	9.73296e-06	High	67.65	2.69626e-05										High	89.61	1.54357e-07	High	72.03	8.39036e-06	High
LSLDSEK	18	1	1	LOC_Os08g20660.1	sucrose-phosphate synthase, putative, expressed	S2(Phospho)	871.383	0	0	6.53573e+07				9.47508e+07			7.74511e+07	5.06519e+07	6.79689e+07	1	S(2): 100.0; S(5): 0.0	0.001	0.01467	190.028	High	13.25	2.33737				High	27.58	0.0862436	High	38.47	0.0070263	High	21.66		High	22.75		High	20.4		High	26.09		High
LSLSYSSR	49	1	1	LOC_Os07g43560.1	TKL_IRAK_DUF26-lc.24 - DUF26 kinases have homology to DUF26 containing loci, expressed	S6(Phospho)	992.449	6.1575e+07	1.50066e+08	1.00935e+08	8.91045e+07		9.56206e+07	1.52757e+08	1.48177e+08	1.49264e+08	1.15563e+08	1.01012e+08	8.62297e+07	0.498134	S(2): 0.0; S(4): 0.0; Y(5): 49.8; S(6): 49.8; S(7): 0.4	0	0.001683	250.19	High	45.1	0.00172129	High	51.84	0.000357104	High	44.79	0.00180551	High	52.36	0.000323486	High	54.26	0.000204548	High	52.83	0.000284312	High	51.76	0.000425089	High	45.93	0.00161331	High
LSNSFLTNSFR	8	2	1	LOC_Os02g01100.3	transmembrane amino acid transporter protein, putative, expressed	S9(Phospho)	1365.62	0	2.52278e+07	2.82012e+07			1.85527e+07	3.07013e+07	3.36193e+07	1.13628e+07	3.10494e+07	2.31264e+07	3.04278e+07	0.999955	S(2): 0.0; S(4): 0.0; T(7): 0.0; S(9): 100.0	0	3.816e-16	344.53										High	39.8	0.0113352	High	51.14	0.000754517	High	33.51	0.0496015							High
LSNSFLTNSFR	9	2	1	LOC_Os02g01100.3	transmembrane amino acid transporter protein, putative, expressed	S4(Phospho); S9(Phospho)	1445.59	0	7.01561e+07	2.70971e+07	1.57613e+07			7.03492e+07	6.70117e+07	7.31074e+07		4.03046e+07	4.09867e+07	0.999953	S(2): 0.0; S(4): 100.0; T(7): 0.0; S(9): 100.0	0	0.0002494	473.786	High	40.73	0.00702849	High	39.59	0.00919318	High	50.26	0.000790716	High	64.81	3.66215e-05	High	59.7	8.9579e-05	High	50.72	0.000930679	High	33.65	0.0480928
LSPSGPR	9	2	1	LOC_Os06g43120.2	zinc finger C-x8-C-x5-C-x3-H type family protein, expressed	S2(Phospho)	793.362	3.59348e+07	0	4.51723e+07	55240773	5.25637e+07					7.1455e+07	6.40619e+07		0.999999	S(2): 100.0; S(4): 0.0	0.001	0.03521	161.031	High	4.81	13.8094	High	28.22	0.0703585													High	34.48	0.0171631	High	33.02	0.0232979
LSSEFSADEINK	21	1	1	LOC_Os08g41400.1	expressed protein	S2(Phospho)	1419.61	4.37659e+07	0	4.27546e+07	5.95293e+07	3.00424e+07	4.17259e+07				5.70168e+07	2.69942e+07	4.4253e+07	0.9999	S(2): 100.0; S(3): 0.0; S(6): 0.0	0	3.642e-05	269.627	High	48.92	0.00119129	High	57.04	0.00018801	High	44.45	0.00316031										High	35.08	0.0288724	High	36.01	0.0233193	High
LSSFASSR	16	1	1	LOC_Os01g37790.1	expressed protein	S3(Phospho)	934.406	2.70755e+07	4.70505e+07	6.22254e+07	2.74165e+07	2.67054e+07	2.71045e+07	4.70582e+07	4.59358e+07	4.81573e+07	7.28793e+07	5.62468e+07	5.75502e+07	1	S(2): 0.0; S(3): 100.0; S(6): 0.0; S(7): 0.0	0	0.006255	246.313	High	26.42	0.170114	High	27.35	0.136585	High	29.77	0.080766	High	47.15	0.00144179	High	43.96	0.00299736	High	32.32	0.0434915	High	41.26	0.00559631	High	43.61	0.0032511	High
LSSLESFK	6	1	1	LOC_Os05g31920.2	FYVE zinc finger domain containing protein, expressed	S3(Phospho)	990.456	0	0	5.05215e+06							8.63393e+06		6.52254e+06	0.999999	S(2): 0.0; S(3): 100.0; S(6): 0.0	0	0.003373	210.973																			High	25.94		High	31.31
LSSNADSLGPTASQDIR	26	4	1	LOC_Os08g01750.3	SAC domain containing protein, putative, expressed	S3(Phospho)	1811.83	3.96031e+07	0	3.09432e+07	3.97907e+07	4.03813e+07	3.86373e+07	9.43603e+06			2.57887e+07	3.07113e+07	3.63296e+07	0.999769	S(2): 0.0; S(3): 100.0; S(7): 0.0; T(11): 0.0; S(13): 0.0	0	4.301e-08	255.593	High	36.79	0.0319562	High	43.18	0.0072751	High	42.75	0.00803494	High	41.35	0.0110986				High	25.75		High	78.8	1.97277e-06	High	50.67	0.00128084	High
LSSPSAPSSPSSAK	60	1	1	LOC_Os09g32820.1	uridine/cytidine kinase-like 1, putative, expressed	S9(Phospho)	1382.62	3.24137e+08	0	1.8709e+08	3.58786e+08	3.19642e+08	2.93983e+08					2.82454e+08	2.78817e+08	0.990406	S(2): 0.0; S(3): 0.0; S(5): 0.0; S(8): 0.9; S(9): 99.0; S(11): 0.0; S(12): 0.0	0	0.0001241	330.193	High	38.05	0.0151035	High	39.03	0.0119587	High	44.36	0.00354712	High	12.31		High	2.56		High	12.6		High	39.65	0.0103569	High	33.72	0.0409121	High
LSSQWSFSR	35	1	1	LOC_Os01g67480.1	helix-loop-helix DNA-binding domain containing protein, expressed	S6(Phospho)	1177.51	1.52141e+08	5.20519e+07	1.88941e+08	1.51208e+08	1.40581e+08	1.64635e+08	7.9701e+07	7.64548e+07		2.03193e+08	1.9267e+08	1.70961e+08	0.999963	S(2): 0.0; S(3): 0.0; S(6): 100.0; S(8): 0.0	0	0.002283	284.843	High	20.46	0.66203	High	26.34	0.16956	High	21.63	0.545189	High	33.48	0.0327584	High	31.73	0.0495179	High	25.87		High	44.14	0.00285447	High	53.57	0.0003257	High
LSSSENQLLK	3	1	1	LOC_Os04g46894.1	beige/BEACH domain containing protein, expressed	S4(Phospho)	1198.57	0	0	1.90063e+07								3.21002e+07	2.49187e+07	0.987746	S(2): 0.0; S(3): 1.2; S(4): 98.8	0	0.01404	180.622
LSSSLQDLPTFSR	17	1	1	LOC_Os10g21000.1	nucleoside-triphosphatase, putative, expressed	S4(Phospho)	1530.73	4.3385e+07	8.83134e+07	7.033e+07	4.51923e+07	4.33775e+07	4.15852e+07	7.91316e+07	1.00687e+08	8.51211e+07	7.35997e+07	6.57856e+07	7.16045e+07	0.999921	S(2): 0.0; S(3): 0.0; S(4): 100.0; T(10): 0.0; S(12): 0.0	0	3.992e-07	323.892	High	23.91	0.490374	High	30.38	0.112237	High	44.26	0.00456155	High	57.63	0.000208222	High	41.29	0.00904254	High	45.52	0.00338476	High	59.33	0.000140542	High	58.72	0.000162273	High
LSVSEISDDHGGGVVSPQR	31	1	1	LOC_Os06g41440.2	expressed protein	S16(Phospho)	2018.92	1.6176e+08	0	6.04123e+07	1.58456e+08	1.48217e+08	1.78609e+08		1.03422e+08			9.81284e+07	8.31086e+07	1	S(2): 0.0; S(4): 0.0; S(7): 0.0; S(16): 100.0	0	3.816e-16	581.357	High	35.52	0.0430494	High	27	0.293902	High	21.53	1.1664	High	20.79		High	46.3	0.00390666	High	22.02		High	49.56	0.00183091	High	52.52	0.000927798	High
LTEEAGRSPNNEK	3	1	1	LOC_Os02g53520.1	kinesin motor domain containing protein, putative, expressed	S8(Phospho)	1524.67	3.33923e+07	0	0		4.95783e+07	5.05987e+07							1	T(2): 0.0; S(8): 100.0	0	5.495e-05	471.9																						High	38.55	0.0157022	High
LTHASPDLSR	20	3	1	LOC_Os08g42370.3	zinc finger DHHC domain-containing protein, putative, expressed	S5(Phospho)	1176.55	1.08753e+08	0	0	116454782	1.12947e+08	9.68573e+07							1	T(2): 0.0; S(5): 100.0; S(9): 0.0	0	0.0001575	310.126	High	15.93	3.25214	High	30.62	0.107417	High	27.1	0.24841	High	25.36		High	29.89		High	25.66		High	40.28	0.0116164	High	40.14	0.0123359	High
LTPGGSDAHDR	7	2	1	LOC_Os03g04710.2	expressed protein	T2(Phospho)	1205.5	0	0	1.0339e+08							1.61748e+08		1.48423e+08	1	T(2): 100.0; S(6): 0.0	0	0.000655	208.751							High	26.73	0.167418	High	28.14					High	25.12
LTSLASNIMSDLQDR	20	1	1	LOC_Os10g42420.1	GTPase-activating protein, putative, expressed	S6(Phospho)	1743.8	8.09228e+07	5.05793e+07	1.24116e+08	8.12236e+07	7.52036e+07	8.63412e+07	4.24953e+07	4.99383e+07	5.93044e+07	1.22976e+08	1.372e+08	1.12172e+08	1	T(2): 0.0; S(3): 0.0; S(6): 100.0; S(10): 0.0	0	2.285e-06	393.354	High	67.77	3.16421e-05	High	76.73	3.94923e-06	High	93.79	7.76538e-08	High	75.57	5.15006e-06	High	93.28	8.6719e-08	High	88.69	2.56218e-07	High	92.85	9.96355e-08	High	93.28	9.18173e-08	High
LTSPQLSPK	19	1	1	LOC_Os07g49040.1	protein phosphotase protein, putative, expressed	S7(Phospho)	1050.53	2.64035e+07	0	0	2.83173e+07	5.0893e+07							1.62977e+07	1	T(2): 0.0; S(3): 0.0; S(7): 100.0	0	0.00197	276.58	High	11.38	5.64029	High	15.99	1.9512										High	11.85		High	33.35	0.0347479	High	39.18	0.00935452	High
LTSTNQEGMAPTAGSR	16	1	1	LOC_Os09g37240.1	glutathione S-transferase, C-terminal domain containing protein, expressed	S3(Phospho)	1700.74	3.15814e+07	0	1.18692e+07	3.08859e+07	3.25726e+07	3.12856e+07	1.24164e+07			2.06287e+07		1.49789e+07	0.999846	T(2): 0.0; S(3): 100.0; T(4): 0.0; T(12): 0.0; S(15): 0.0	0	1.249e-07	271.084	High	32.37	0.069937							High	47.74	0.00198471							High	80.64	9.99329e-07	High	57.48	0.000214289	High
LVESLSDQDFR	10	1	1	LOC_Os04g26910.1	oxidoreductase, aldo/keto reductase family protein, putative, expressed	S6(Phospho)	1388.61	0	0	7.28299e+07					3.88675e+07		7.68016e+07	6.70628e+07	7.46253e+07	1	S(4): 0.0; S(6): 100.0	0	0.0002952	344.18	High	55.91	0.000277349	High	47.26	0.00210483	High	52.38	0.000626078				High	40.69	0.00943955
LVETALDSK	15	1	1	LOC_Os02g20410.1	GTP binding protein, putative, expressed	S8(Phospho)	1055.51	0	0	4.18747e+07		2.92685e+07				2.83632e+07	4.52332e+07	3.94735e+07	4.09174e+07	1	T(4): 0.0; S(8): 100.0	0	0.007666	236.35	High	36.91	0.0147482	High	30.41	0.0635119	High	26.89	0.144172	High	25.33		High	27.38		High	32.86	0.0385358	High	31.2		High	43.64	0.00314221	High
LVNSSFADLQKPQMELDGK	40	1	1	LOC_Os05g38150.1	amino acid kinase, putative, expressed	S5(Phospho)	2200.04	6.56605e+08	1.97465e+08	4.74516e+08	6.81783e+08	6.8526e+08	6.02771e+08	1.2246e+08	3.47179e+08	1.22756e+08	1.74022e+08	5.71124e+08	6.78401e+08	0.99991	S(4): 0.0; S(5): 100.0	0	8.101e-09	471.484	High	87.98	2.36841e-07	High	67.34	2.72693e-05	High	82.97	7.80206e-07	High	79.32	1.8215e-06	High	78.88	2.01636e-06	High	70.2	1.48501e-05	High	81.32	1.09948e-06	High	87.61	2.61198e-07	High
LVNSSFADLQKPQMELDGK	17	1	1	LOC_Os05g38150.1	amino acid kinase, putative, expressed	S5(Phospho); M14(Oxidation)	2216.03	0	3.48425e+07	0				7.84765e+07		2.6051e+07			1.10968e+08	0.984979	S(4): 1.5; S(5): 98.5	0	4.464e-06	369.759	High	21.58	1.12038	High	32.17	0.0989587	High	22.49	0.892238	High	40.87	0.0132141	High	29.96		High	40.82	0.0132802	High	28.24		High	20.64		High
LVPGEPNISYICSR	40	1	1	LOC_Os10g37740.1	CGMC_GSK.9 - CGMC includes CDA, MAPK, GSK3, and CLKC kinases, expressed	Y10(Phospho); C12(Carbamidomethyl)	1684.78	0	2.96571e+08	0			1.79575e+08	3.21455e+08	3.35508e+08	2.32751e+08		1.82608e+08		0.990384	S(9): 1.0; Y(10): 99.0; S(13): 0.0	0	0.0007962	300.012	High	32.9	0.0816219	High	23.42	0.733213	High	30.91	0.128537	High	46.56	0.00351514	High	45.24	0.00468439	High	36.2	0.0380335	High	34.75		High	34.26		High
LVTASSSASR	23	1	1	LOC_Os02g49680.1	arsenate reductase, putative, expressed	T3(Phospho)	1058.49	3.98359e+08	3.68233e+08	9.93359e+08	595738497		5.99338e+08	5.62452e+08		5.42246e+08	1.03614e+09	9.36806e+08	1.00714e+09	1	T(3): 100.0; S(5): 0.0; S(6): 0.0; S(7): 0.0; S(9): 0.0	0	0.002277	280.407	High	30.47	0.0791083	High	37.77	0.0147641	High	36.59	0.0193296	High	37.15	0.0169911	High	21.05		High	34.52	0.030674	High	36.95	0.016813	High	31.97		High
LVTHSSNISQLISQK	50	2	1	LOC_Os12g35610.2	respiratory burst oxidase, putative, expressed	S6(Phospho)	1734.88	0	8.9586e+07	5.91878e+07				7.97601e+07	9.27352e+07	9.62628e+07	8.55814e+07		9.19821e+07	1	T(3): 0.0; S(5): 0.0; S(6): 100.0; S(9): 0.0; S(13): 0.0	0	7.443e-08	444.225	High	45.91	0.00307995	High	37.52	0.0229052	High	46.18	0.00289791	High	41.02	0.0101681	High	40.51	0.0113418	High	45.31	0.00353625	High	24.98		High	7.8		High
LVYTNDQGEIVK	11	3	2	LOC_Os02g01340.2 ;LOC_Os06g01850.1	ferredoxin--NADP reductase, chloroplast precursor, putative, expressed	T4(Phospho)	1458.69	0	0	4.81843e+07			3.96919e+07		4.50416e+07		8.41727e+07	6.03803e+07		0.999999	Y(3): 0.0; T(4): 100.0	0	0.0003414	309.041	High	43.22	0.00644849	High	38.59	0.0200963	High	36.54	0.032308	High	33.47		High	41.75	0.00965089	High	26.71								High
LYGHSISAMTGVR	18	1	1	LOC_Os03g42320.1	Sec1 family transport protein, putative, expressed	S7(Phospho)	1471.68	4.56821e+07	0	1.48112e+07	8.64476e+06	1.28402e+08					2.10589e+07	2.33748e+07		1	Y(2): 0.0; S(5): 0.0; S(7): 100.0; T(10): 0.0	0	4.385e-06	432.005	High	38.65	0.016682	High	35.07	0.0381341	High	28.49	0.173506	High	16.35		High	25.94		High	18.52		High	34.52	0.0444481	High	55.2	0.000370095	High
LYVTEANPEHEPYLDDTNSGPLER	15	1	1	LOC_Os09g38390.1	octicosapeptide/Phox/Bem1p, putative, expressed	S19(Phospho)	2839.26	8.04597e+07	1.78716e+08	1.69077e+08		1.2101e+08	1.20369e+08	1.94199e+08	1.59807e+08	1.82144e+08	1.6797e+08	1.63589e+08	1.75672e+08	1	Y(2): 0.0; T(4): 0.0; Y(13): 0.0; T(17): 0.0; S(19): 100.0	0	8.443e-06	482.518	High	30.48	0.164971	High	37.55	0.0334797	High	32.32	0.107381	High	49.01	0.00240467	High	51.48	0.00136197	High	36.76	0.039969	High	30.12		High	45.13	0.00566695	High
MAAMSPVVAPGTPSGGGGGAGSFK	62	2	1	LOC_Os04g23890.4	AGC_PVPK_like_kin82y.10 - ACG kinases include homologs to PKA, PKG and PKC, expressed	S22(Phospho)	2170.98	1.33016e+08	3.0981e+07	0	1.9446e+08	1.03038e+08	1.0155e+08		5.55331e+07	3.74098e+07			5.23367e+07	1	S(5): 0.0; T(12): 0.0; S(14): 0.0; S(22): 100.0	0	0.0001045	442.797	High	31.42	0.121038	High	25.53	0.46827	High	33.45	0.0754825	High	25.39		High	36.02	0.0420683	High	38.03	0.0264193	High	38.77	0.0222936	High	38.56	0.0233702	High
MAAVSPSK	15	1	1	LOC_Os04g53680.1	cyclin, putative, expressed	S5(Phospho)	870.382	0	0	5.57112e+07			1.34282e+07			2.29904e+07	5.50225e+07	5.13781e+07	6.07329e+07	0.999927	S(5): 100.0; S(7): 0.0	0	0.009289	215.612	High	39.36	0.00692369	High	38.25	0.0086258	High	43.32	0.00278886	High	27.51		High	24.71		High	31.48	0.0428862							High
MAENSHEATAQSEEK	9	2	1	LOC_Os07g08880.1	ES43 protein, putative, expressed	S5(Phospho)	1741.68	5.46146e+07	0	0		1.09992e+08	5.38515e+07							1	S(5): 100.0; T(9): 0.0; S(12): 0.0	0	8.524e-09	590.605				High	25.03	0.313737																High	86.18	2.38822e-07	High
MASIDAQLR	52	1	1	LOC_Os08g27840.1	phosphoenolpyruvate carboxylase, putative, expressed	S3(Phospho)	1084.49	1.78005e+08	5.74207e+07	4.70128e+08	191870564	1.95288e+08	1.46856e+08	5.8064e+07	5.42282e+07	5.99699e+07	5.9836e+08	3.66108e+08	4.45918e+08	1	S(3): 100.0	0	0.000235	312.637	High	67.52	1.27271e-05	High	69.17	9.32766e-06	High	59.76	7.6725e-05	High	43.17	0.00371341	High	49.23	0.000866238	High	43.77	0.00324893	High	69.82	7.50469e-06	High	59.65	7.80969e-05	High
MAVASPR	12	1	1	LOC_Os06g12610.1	auxin efflux carrier component, putative, expressed	S5(Phospho)	811.359	3.68596e+07	0	0	3.62714e+07	3.51178e+07	3.91895e+07		2.08721e+07		2.95306e+07			1	S(5): 100.0	0	0.003876	181.756	High	25.82	0.174895										High	40.53	0.00598781	High	27.22		High	41.97	0.00430754	High	32.54	0.0376658	High
MDGDADAVKSGR	2	1	1	LOC_Os07g10770.1	CESA8 - cellulose synthase, expressed	N-Term(Acetyl); S10(Phospho)	1343.53	2.15816e+07	0	0	3.07848e+07	3.396e+07								1	S(10): 100.0	0	2.103e-05	464.205																			High	67.99	1.0397e-05	High	68.16	1.00285e-05
MDGHPSPR	13	1	1	ChrSy.fgenesh.mRNA.37	#N/A	N-Term(Acetyl); S6(Phospho)	1018.39	0	3.41828e+08	0	226088923				5.00667e+08	5.24817e+08				1	S(6): 100.0	0	0.01379	232.385	High	19.23	0.496699	High	24.03	0.168426	High	30.54	0.0370452	High	17.76		High	32.62	0.0229473	High	47.79	0.000754358	High	30.77	0.0351344				High
MDGLHGTDGCFSPGR	15	2	1	LOC_Os05g40290.2	KH domain-containing protein, putative, expressed	N-Term(Acetyl); C10(Carbamidomethyl); S12(Phospho)	1728.65	0	0	4.07654e+07								6.71217e+07	5.51747e+07	1	T(7): 0.0; S(12): 100.0	0	1.598e-06	448.222	High	27.5	0.110787	High	29.7	0.0714703	High	44.45	0.00234914	High	17.44		High	16.67		High	11.46		High	26.91		High	28.69		High
MDSDGASGQGSFGR	3	2	1	LOC_Os06g19660.1	WD domain, G-beta repeat domain containing protein, expressed	M1(Oxidation); S11(Phospho)	1467.52	0	1.3178e+07	0					1.1828e+07	2.7706e+07				0.999998	S(3): 0.0; S(7): 0.0; S(11): 100.0	0	5.11e-05	285.413													High	44.12	0.00125859	High	50.79	0.000253439
MDTASVTGGEHK	14	1	1	LOC_Os10g32980.1	CESA7 - cellulose synthase, expressed	N-Term(Acetyl); S5(Phospho)	1354.54	7.42916e+07	0	2.57092e+07	7.50437e+07	7.19143e+07	7.59169e+07	1.61397e+07			2.84761e+07	2.59876e+07	2.2664e+07	1	T(3): 0.0; S(5): 100.0; T(7): 0.0	0	1.094e-05	372.413	High	37.55	0.0109958	High	36.5	0.0139808	High	32.6	0.0445678	High	52.08	0.000416574	High	28.56					High	61.15	4.72695e-05	High	46.62	0.00134147	High
MDYISPDR	26	2	1	LOC_Os01g26940.1	transposon protein, putative, CACTA, En/Spm sub-class, expressed	N-Term(Acetyl); S5(Phospho)	1118.42	0	0	1.06602e+08							1.24496e+08	1.0885e+08	8.64606e+07	1	Y(3): 0.0; S(5): 100.0	0	0.0007605	314.408	High	36.97	0.00594691	High	36.37	0.00690871	High	36.76	0.00632588	High	14.56		High	23.78		High	23.38		High	26.62		High	27.06		High
MEAPGSPYASSPESAPK	33	1	1	LOC_Os02g57640.1	KH domain containing protein, putative, expressed	N-Term(Acetyl); S6(Phospho)	1827.75	1.3538e+08	2.95521e+07	1.32307e+08	2.38545e+08	4.08941e+07	1.26701e+08	4.52398e+06	2.81071e+07	5.60253e+07	1.46353e+08	1.22847e+08	1.27722e+08	0.999999	S(6): 100.0; Y(8): 0.0; S(10): 0.0; S(11): 0.0; S(14): 0.0	0	4.368e-06	397.247	High	55.84	0.000230123	High	56.07	0.000220849	High	57.34	0.000157749	High	51.36	0.000653638	High	54.81	0.000307904	High	58.87	0.000107147	High	59.64	0.000101255	High	59.63	9.95827e-05	High
MEAPGSPYASSPESAPK	49	1	1	LOC_Os02g57640.1	KH domain containing protein, putative, expressed	N-Term(Acetyl); S6(Phospho); S11(Phospho)	1907.72	2.74393e+07	0	0	4.34954e+07		3.88224e+07				2.82104e+07			0.97523	S(6): 98.8; Y(8): 1.2; S(10): 1.2; S(11): 98.8; S(14): 0.0	0	8.064e-06	421.859	High	25.29	0.197447	High	11.58	4.50028	High	12.83	3.06984	High	11.94		High	26.86		High	19.25		High	36.9	0.0149455	High	18.95		High
MEDQSLKPIR	23	1	1	LOC_Os03g09020.1	dehydrogenase, putative, expressed	N-Term(Acetyl); S5(Phospho)	1338.61	1.32977e+08	4.66897e+08	5.69646e+08	1.95351e+08		2.0358e+08	4.85021e+08	4.65796e+08	4.49876e+08	6.10538e+08	4.86533e+08	6.11868e+08	1	S(5): 100.0	0	0.000703	434.982	High	46.39	0.00307569	High	36.04	0.0333382	High	43.86	0.0058116	High	49.21	0.00162412	High	45.44	0.00386918	High	45.94	0.00345095	High	35.28	0.0417745	High	46.23	0.00336384	High
MEEVTEAVSNLSITEPHKK	15	2	1	LOC_Os06g40040.2	protein of unknown function domain containing protein, expressed	N-Term(Acetyl); S12(Phospho)	2264.06	4.62753e+07	0	0		7.44259e+07	6.43999e+07							0.5	T(5): 0.0; S(9): 0.0; S(12): 50.0; T(14): 50.0	0	6.019e-09	465.645	High	39.04	0.0246046	High	29.69	0.204756	High	28.36	0.287532	High	15.56		High	15.99					High	29.95		High	40.92	0.0158421	High
MEMESPRSPEAEIGHR	67	2	1	LOC_Os04g31340.1	CBS domain containing membrane protein, putative, expressed	N-Term(Acetyl); S5(Phospho); S8(Phospho)	2057.79	1.63388e+09	0	1.61989e+09	1677467319	1.60896e+09	1.61522e+09	2.13948e+09			1.61836e+09	1.59301e+09	1.6483e+09	1	S(5): 100.0; S(8): 100.0	0	2.674e-06	442.568	High	36.88	0.0186861	High	36.7	0.019402	High	37.46	0.01635	High	39.28	0.0105875	High	30.46		High	27.17		High	40.62	0.00807142	High	35.98	0.0234053	High
MENVTGGGGGGSPR	26	1	1	LOC_Os05g28740.1	universal stress protein domain containing protein, putative, expressed	N-Term(Acetyl); S12(Phospho)	1397.55	8.58029e+07	3.57965e+08	6.17039e+08	1.2878e+08		1.28629e+08	3.59816e+08	3.69105e+08	3.44974e+08	6.9826e+08	5.61991e+08	5.90865e+08	1	T(5): 0.0; S(12): 100.0	0	3.299e-06	398.047	High	55.58	0.0001858	High	44.64	0.00232417	High	53.26	0.000313686	High	58.78	8.89295e-05	High	64	2.64542e-05	High	54.03	0.000266477	High	31.52	0.0473906	High	21.27		High
MEPDQSGAEQTSPR	18	1	1	LOC_Os02g57600.1	expressed protein	N-Term(Acetyl); S12(Phospho)	1654.64	8.66968e+07	0	1.01749e+08		1.36588e+08	1.23502e+08				1.05155e+08	1.03617e+08	9.64745e+07	0.999948	S(6): 0.0; T(11): 0.0; S(12): 100.0	0	1.948e-06	436.2	High	39.16	0.00828745	High	47.54	0.00125276	High	22.53	0.384786	High	15.45					High	12.93		High	29.69		High	44.52	0.00250407	High
MEVSQRPPMAVTNAVSWR	16	2	1	LOC_Os01g50770.2	adaptor complexes medium subunit family domain containing protein, expressed	T12(Phospho)	2139	0	0	1.59979e+08		2.4266e+08					2.34077e+08	2.4586e+08		0.999998	S(4): 0.0; T(12): 100.0; S(16): 0.0	0	8.212e-07	461.27	High	44.41	0.00589007	High	44.27	0.00616721	High	31.61	0.113786	High	27.72		High	28.8		High	12.06		High	15.04		High	46.26	0.00384699	High
MEVTQRPPMAVTNAVSWR	11	1	1	LOC_Os05g46550.1	adaptor complexes medium subunit family domain containing protein, expressed	T12(Phospho)	2153	3.93569e+07	0	0	5.96704e+07	5.84004e+07								1	T(4): 0.0; T(12): 100.0; S(16): 0.0	0	2.333e-05	373.475				High	40.6	0.0163828	High	36.37	0.0396876	High	34.81								High	36.24	0.0413451	High	41.29	0.0126722	High
MFNPNDPVDNPEAFSSSIAAPSPSR	13	1	1	LOC_Os08g41470.2	proteophosphoglycan ppg4, putative, expressed	S22(Phospho)	2727.18	8.42057e+07	4.48888e+07	1.38032e+08		1.18651e+08	1.33966e+08		5.9165e+07	7.55013e+07	1.41212e+08	1.38887e+08	1.33996e+08	0.999823	S(15): 0.0; S(16): 0.0; S(17): 0.0; S(22): 100.0; S(24): 0.0	0	2.558e-09	446.938	High	68.68	3.11829e-05	High	61.12	0.000178103	High	32.56	0.124125				High	53.19	0.00110722	High	48.72	0.00309239				High	46.91	0.00470659	High
MGSLHVSIPEPDPDDAK	28	2	1	LOC_Os02g10650.2	CRAL/TRIO domain containing protein, expressed	S3(Phospho)	1887.82	2.3213e+07	0	3.94414e+07	28999428	1.22001e+07	2.84393e+07			5.96759e+07	7.07944e+07		4.75297e+07	1	S(3): 100.0; S(7): 0.0	0	9.468e-08	398.29	High	27.38	0.239207	High	44.7	0.00444564	High	27.93	0.21027	High	26.21		High	33.4		High	52.93	0.000678938	High	45.13	0.00408026	High	49.77	0.00141024	High
MIAPLAMGALPSPTGR	8	1	1	LOC_Os01g54400.1	VQ domain containing protein, putative, expressed	T14(Phospho)	1662.82	4.37322e+07	0	0	5.0577e+07	3.42404e+07	4.63793e+07							0.999925	S(12): 0.0; T(14): 100.0	0	1.701e-06	463.481																			High	48.06	0.00205554	High	38.88	0.0160674	High
MISSLAGHSSVK	9	1	1	LOC_Os12g44130.1	expressed protein	S3(Phospho)	1296.61	9.42241e+07	0	0	8.97747e+07	9.09643e+07	1.01933e+08					2.89156e+07		0.999999	S(3): 100.0; S(4): 0.0; S(9): 0.0; S(10): 0.0	0	1.34e-05	312.728																			High	53.81	0.000493686	High	57.81	0.000196623	High
MLAPVPAHSEVSPDNVSGR	63	2	1	LOC_Os11g28270.2	zinc finger C-x8-C-x5-C-x3-H type family protein, expressed	S12(Phospho)	2042.94	4.76159e+08	1.44115e+08	8.26469e+08	4.52259e+08	4.47198e+08	5.2902e+08	1.36105e+08	9.6904e+07	1.99335e+08	1.02855e+09	6.53596e+08	7.9726e+08	1	S(9): 0.0; S(12): 100.0; S(17): 0.0	0	3.816e-16	600.416	High	62.67	8.46551e-05	High	57.53	0.000273029	High	51.99	0.000975811	High	46.53	0.00348837	High	52.5	0.000895529	High	47.74	0.002593	High	55.11	0.000475273	High	48.21	0.00233458	High
MLAPVPAHSEVSPDNVSGR	24	2	1	LOC_Os11g28270.2	zinc finger C-x8-C-x5-C-x3-H type family protein, expressed	M1(Oxidation); S12(Phospho)	2058.94	0	0	6.9593e+07							9.43639e+07	1.14415e+08		0.5	S(9): 50.0; S(12): 50.0; S(17): 0.0	0	1.019e-05	386.753	High	25.89	0.448666	High	22.57	0.965873	High	22.58	0.961443	High	16.2		High	15.73					High	3.24		High	20.63		High
MLAYSTVGTPDYIAPEVLLK	6	2	1	LOC_Os05g43570.1	AGC_AGC_other_NDRh_TRCd.2 - ACG kinases include homologs to PKA, PKG and PKC, expressed	S5(Phospho)	2261.14	0	0	1.78949e+07							2.60371e+07		2.76476e+07	0.496754	Y(4): 0.6; S(5): 49.7; T(6): 49.7; T(9): 0.0; Y(12): 0.0	0	5.813e-05	348.185	High	41.3	0.01066
MLDHDDSDSEMHTSK	31	1	1	LOC_Os07g32350.1	WD domain, G-beta repeat domain containing protein, expressed	S7(Phospho)	1827.66	8.21245e+07	0	0		1.16504e+08	1.2987e+08	1.44419e+08				1.67693e+08		1	S(7): 100.0; S(9): 0.0; T(13): 0.0; S(14): 0.0	0	3.816e-16	558.259	High	23.16	0.205542	High	17.12	0.775384				High	39.22	0.00494852	High	6.46		High	10.42		High	28.04		High	30.82	0.0351461	High
MLQHSNSANEMLLR	50	1	1	LOC_Os07g48410.1	RNA-binding zinc finger protein, putative, expressed	S7(Phospho)	1723.77	1.78051e+08	0	1.62644e+08	175517318	1.78248e+08	1.80387e+08		1.75124e+08		1.79676e+08	1.56808e+08	1.51449e+08	1	S(5): 0.0; S(7): 100.0	0	1.94e-06	393.94	High	42.19	0.0105178	High	40.2	0.0152942	High	41.33	0.0117351	High	29.56		High	37.67	0.0277877	High	31.3		High	50.94	0.00142753	High	47.66	0.0027449	High
MNSMPSPLAR	7	5	1	LOC_Os03g61160.2	expressed protein	S3(Phospho); S6(Phospho)	1263.47	0	0	4.24531e+07					5.79084e+07		7.2376e+07		5.49832e+07	1	S(3): 100.0; S(6): 100.0	0	0.0113	332.581										High	17.45		High	32.59	0.0201045
MNSMPSPLAR	30	5	1	LOC_Os03g61160.2	expressed protein	S3(Phospho)	1183.5	0	4.40851e+08	3.25031e+08				4.01706e+08	4.51997e+08	4.68851e+08	4.821e+08	3.58528e+08	1.34465e+08	1	S(3): 100.0; S(6): 0.0	0	0.003409	307.343	High	61.35	4.52519e-05	High	61.41	4.45226e-05	High	44.8	0.002005	High	62.32	3.81869e-05	High	62.26	3.85696e-05	High	62.29	3.63859e-05
MNSMPSPLAR	10	5	1	LOC_Os03g61160.2	expressed protein	S3(Phospho); M4(Oxidation)	1199.5	0	1.02835e+08	0				1.01618e+08	8.67365e+07	1.20151e+08	4.18864e+07			1	S(3): 100.0; S(6): 0.0	0	0.003479	288.294										High	42.44	0.00368611	High	34.99	0.0204754	High	44.32	0.00239094
MNVDSPNSSAK	18	1	1	LOC_Os03g07580.1	OsNucAP1 - Putative Nucleoporin Autopeptidase homologue, expressed	S5(Phospho)	1229.49	3.07279e+08	0	3.03982e+08	306429767	3.0478e+08	3.10628e+08	2.90832e+08			3.1966e+08	2.89424e+08	3.0286e+08	1	S(5): 100.0; S(8): 0.0; S(9): 0.0	0	0.0001775	380.591	High	69.7	7.39348e-06	High	55.05	0.000214918	High	57.6	0.000119474	High	48.45	0.000980936	High	29.89					High	53.61	0.00024454	High	42.34	0.00401119	High
MQALEMVNLSPR	12	1	1	LOC_Os12g05420.1	calmodulin-binding protein, putative, expressed	S10(Phospho)	1468.67	7.6804e+07	0	2.59607e+07	8.09481e+07	6.95822e+07	7.98816e+07				3.99975e+07	2.1102e+07	1.67827e+07	1	S(10): 100.0	0	8.874e-07	396.281				High	43.17	0.00558337	High	51.46	0.000829173							High	27.98		High	55.04	0.000378971	High	40.81	0.00989597	High
MQSSAQVGLR	15	1	1	LOC_Os01g61880.1	respiratory burst oxidase, putative, expressed	S3(Phospho)	1156.52	7.43724e+07	3.63672e+07	9.89914e+07	7.57683e+07	7.15459e+07	7.58031e+07		5.38191e+07	5.52825e+07	1.03259e+08	9.42798e+07	9.94353e+07	0.999898	S(3): 100.0; S(4): 0.0	0	0.0003025	223.331	High	26.92	0.183725	High	50.29	0.000837656				High	32.3		High	50.16	0.000863109	High	40.12	0.00822458	High	52.6	0.000488267	High	51.5	0.000630072	High
MSPAEASR	47	1	1	LOC_Os03g50290.1	14-3-3 protein, putative, expressed	N-Term(Acetyl); S2(Phospho)	970.372	1.2075e+09	3.14994e+08	1.39991e+09	1.28515e+09	1.2297e+09	1.10766e+09	3.1654e+08	3.31097e+08	2.97345e+08	1.56014e+09	1.33816e+09	1.30142e+09	1	S(2): 100.0; S(7): 0.0	0	0.00776	276.34	High	54.24	0.000117908	High	52.33	0.000181285	High	52.5	0.00017292	High	39.66	0.00335245	High	38.28	0.0046064	High	46.81	0.000646192	High	54.27	0.000116535	High	54.29	9.68218e-05	High
MSPAEASR	35	1	1	LOC_Os03g50290.1	14-3-3 protein, putative, expressed	S2(Phospho)	928.363	1.17641e+09	0	1.52358e+09	1.25078e+09	1.15094e+09	1.12752e+09				1.48482e+09	1.56832e+09	1.51758e+09	1	S(2): 100.0; S(7): 0.0	0	0.003029	158.988	High	31.27	0.0201914	High	37.16	0.00519235	High	33.63	0.0117265	High	10.15		High	14.51		High	9.74		High	40.47	0.00243652	High	37.03	0.00536003	High
MSSAGGGGGMGSR	18	1	1	LOC_Os05g50280.1	transporter family protein, putative, expressed	S12(Phospho)	1191.43	5.94712e+07	1.70333e+08	1.66451e+08	6.79093e+07	5.94357e+07	5.10685e+07	1.89677e+08	1.55053e+08	1.66268e+08	1.56534e+08	1.80725e+08	1.62094e+08	1	S(2): 0.0; S(3): 0.0; S(12): 100.0	0	2.678e-06	298.028										High	47.35	0.000649793	High	44.6	0.00122398	High	37.83	0.00581801	High	62.6	1.96186e-05	High	60.01	3.5568e-05	High
MTAGMSSMSFK	55	1	1	LOC_Os02g46962.1	VHS and GAT domain containing protein, expressed	S9(Phospho)	1257.47	1.68981e+09	6.5233e+08	1.16352e+09	1.68795e+09	1.48153e+09	1.89995e+09	4.46438e+08	7.74376e+08	7.36177e+08	1.25194e+09	1.17244e+09	1.06619e+09	1	T(2): 0.0; S(6): 0.0; S(7): 0.0; S(9): 100.0	0	2.886e-06	332.245	High	59.79	4.2349e-05	High	66.03	1.01281e-05	High	79.42	4.61151e-07	High	59.45	4.57977e-05	High	66.21	8.90313e-06	High	61.13	3.05278e-05	High	66.25	9.81749e-06	High	66.08	1.02094e-05	High
MTAGMSSMSFK	68	1	1	LOC_Os02g46962.1	VHS and GAT domain containing protein, expressed	M5(Oxidation); S9(Phospho)	1273.47	2.41687e+08	0	1.39707e+08	2.55829e+08	2.28443e+08	2.4079e+08			1.69719e+08		1.89686e+08	2.29434e+08	1	T(2): 0.0; S(6): 0.0; S(7): 0.0; S(9): 100.0	0	0.001326	363.376	High	49.66	0.000538554	High	37.12	0.00905423	High	47.3	0.000916147	High	26.41		High	26.35		High	40.94	0.00399065	High	59.67	5.45947e-05	High	38.85	0.00643764	High
MTDAGALDLIDDEDSDVEEGIDQQTR	6	2	1	LOC_Os05g44320.2	WD domain, G-beta repeat domain containing protein, expressed	S15(Phospho)	2931.22	1.28404e+07	0	0		1.41121e+07	2.44091e+07					2.88436e+06		1	T(2): 0.0; S(15): 100.0; T(25): 0.0	0	3.816e-16	232.013				High	36.61	0.0379904																High	47.17	0.00356297	High
MTNSPSFR	17	1	1	LOC_Os05g28300.1	expressed protein	S6(Phospho)	1019.41	6.78047e+07	0	7.70873e+07	1.01337e+08		1.02077e+08				1.2776e+08	1.03502e+08		0.991782	T(2): 0.0; S(4): 0.8; S(6): 99.2	0	0.0001007	199.331	High	25.82	0.0997528	High	25.77	0.100643				High	17.18		High	28.68					High	43.05	0.00183564	High	26.3		High
MTSGNFSPDDQR	16	2	1	LOC_Os08g01054.1	retrotransposon protein, putative, unclassified, expressed	S7(Phospho)	1434.54	7.07421e+07	0	6.92379e+07	7.83698e+07	7.82465e+07	5.561e+07		6.10751e+07		7.24312e+07	6.84786e+07	6.68039e+07	1	T(2): 0.0; S(3): 0.0; S(7): 100.0	0	3.158e-06	330.633	High	54.72	0.000146383	High	51.98	0.00027922	High	40.99	0.00356281				High	50.45	0.000404355				High	32.1	0.0269144	High	59.47	5.10103e-05	High
MVEEQGAAPESPYK	10	4	1	LOC_Os07g42700.1	paramyosin, putative, expressed	S11(Phospho)	1615.68	6.91285e+07	0	3.6937e+07	66847082	6.87615e+07	7.1777e+07			5.38922e+07	5.81338e+07	5.26773e+07		1	S(11): 100.0; Y(13): 0.0	0	1.16e-05	422.698							High	14.06	3.75958							High	40.19	0.00925128	High	39.31	0.0115461	High	38.75	0.0130018	High
MVHGSASPAQPNNPSKPK	76	1	1	LOC_Os04g31030.1	nitrate-induced NOI protein, expressed	S7(Phospho)	1926.89	6.42686e+08	0	0	6.49339e+08	6.13233e+08	6.65486e+08	1.27014e+09				8.04166e+08		1	S(5): 0.0; S(7): 100.0; S(15): 0.0	0	9.563e-08	448.759	High	26.27	0.35596	High	26.71	0.324863	High	24.32	0.565467	High	37.2	0.0290487	High	29.86		High	29.26		High	51.81	0.00100821	High	44.92	0.00476074	High
MVPMSGTGPSSPPSR	90	1	1	LOC_Os09g31470.1	AT hook motif domain containing protein, expressed	S10(Phospho)	1567.67	2.17344e+08	7.39498e+07	0		2.30833e+08	4.21198e+08		2.67808e+06	2.19171e+08			4.99434e+08	0.999919	S(5): 0.0; T(7): 0.0; S(10): 100.0; S(11): 0.0; S(14): 0.0	0	0.0004293	470.216	High	42.64	0.00754408	High	50.38	0.00128133	High	48.74	0.00180374	High	51.03	0.00107798	High	42.9	0.00776729	High	41.83	0.00906793	High	53.42	0.000687714	High	48.77	0.00200636	High
MWDEEEEVQSPLAFK	4	1	1	LOC_Os03g55540.1	ZOS3-18 - C2H2 zinc finger protein, expressed	S10(Phospho)	1917.8	2.96408e+07	0	0	28219489	3.22273e+07	2.84758e+07							1	S(10): 100.0	0	1.238e-09	431.475																			High	44.6	0.00434461	High	53.37	0.000572099	High
MYGSPVSK	15	1	1	LOC_Os08g39630.1	helix-loop-helix DNA-binding domain containing protein, expressed	N-Term(Acetyl); S4(Phospho)	990.404	2.92796e+07	0	5.79938e+07	4.26792e+07	4.51596e+07				3.20945e+07	8.9762e+07		8.42195e+07	0.999999	Y(2): 0.0; S(4): 100.0; S(7): 0.0	0	0.005393	206.41	High	30.3	0.0364436	High	28.59	0.0545125	High	26.13	0.0903209	High	15.58		High	22.3		High	30.83	0.0319264	High	30.47	0.0342369	High	29.36	0.0443232
NAAHPVGTPPSNHPAK	31	1	1	LOC_Os11g14300.1	la domain containing protein, expressed	T8(Phospho)	1674.78	2.53683e+08	3.05712e+08	0	2.49622e+08	2.50766e+08	2.60661e+08	3.19806e+08	2.9996e+08	2.97369e+08		2.84541e+08		0.99089	T(8): 99.1; S(11): 0.9	0	2.954e-06	438.432	High	30.37	0.143306	High	35.66	0.0420776	High	42.07	0.0095738	High	36.5	0.0349129	High	38.58	0.0215433	High	38.28	0.023084	High	36.9	0.0317184	High	41.66	0.0106172	High
NAALQIPTSFIYR	18	1	1	LOC_Os05g19970.1	ZOS5-06 - C2H2 zinc finger protein, expressed	S9(Phospho)	1573.78	0	1.18255e+07	0					1.64855e+07	1.89909e+07				0.992343	T(8): 0.8; S(9): 99.2; Y(12): 0.0	0	0.000979	378.591							High	26.4	0.307549	High	31.98		High	46.1	0.00331754	High	46.64	0.00286245	High	32.28		High	28.85		High
NADPSKYSPR	16	2	1	LOC_Os01g59410.1	VQ motif family protein, expressed	S8(Phospho)	1214.52	2.95779e+08	0	0	2.92849e+08	3.0653e+08	2.87958e+08		1.76403e+08				1.30544e+08	0.994227	S(5): 0.0; Y(7): 0.6; S(8): 99.4	0	0.003899	319.559	High	20.06	0.850666	High	9.94	8.7754				High	28.55		High	35.29	0.0254389	High	14.66		High	37.27	0.0163875	High	33.49	0.038369	High
NASAMSLPDDDAAYAK	14	1	1	LOC_Os01g53680.1	6-phosphofructokinase, putative, expressed	S3(Phospho); S6(Phospho)	1799.66	1.8698e+07	3.23373e+07	5.21702e+07	4.98623e+06	2.36434e+07	2.74643e+07	1.79626e+07	5.72055e+07	2.18436e+07	5.7917e+07	4.85135e+07	5.00802e+07	1	S(3): 100.0; S(6): 100.0; Y(14): 0.0	0	6.041e-08	457.935							High	39.42	0.00637155	High	73.09	2.73436e-06	High	71.18	4.05426e-06	High	33.6	0.024052	High	69.75	5.97949e-06	High	70.92	4.36912e-06	High
NASSVSLADAAYVK	38	2	1	LOC_Os05g44922.2	6-phosphofructokinase, putative, expressed	S3(Phospho)	1475.68	1.7812e+08	4.21911e+07	2.93992e+08	186868111	1.67868e+08	1.79622e+08	3.59865e+07	4.32266e+07	4.736e+07	3.29776e+08	2.8405e+08	2.6815e+08	0.999999	S(3): 100.0; S(4): 0.0; S(6): 0.0; Y(12): 0.0	0	3.564e-06	335.163	High	83.02	6.64764e-07	High	89.79	1.43e-07	High	77.8	2.24791e-06	High	75.29	4.03029e-06	High	80.68	1.11159e-06	High	74.98	4.29831e-06	High	79.34	1.58263e-06	High	74.86	4.46282e-06	High
NAVGIPEGISDEDEVVAVVHK	11	1	1	LOC_Os03g10100.1	transporter family protein, putative, expressed	S10(Phospho)	2257.08	0	4.4129e+07	0					6.06127e+07	7.17743e+07		3.52297e+07		1	S(10): 100.0	0	5.276e-08	431.709				High	32.9	0.0765958							High	61.22	0.000112395	High	69.74	1.58564e-05	High	32.19					High
NCTVTGVEMFQK	9	1	1	LOC_Os02g38210.1	elongation factor Tu, putative, expressed	C2(Carbamidomethyl); T3(Phospho)	1493.62	1.79294e+07	0	0		2.69629e+07	2.68253e+07							1	T(3): 100.0; T(5): 0.0	0	0.0002311	284.772				High	46.41	0.00162963	High	46.9	0.00213157										High	31.12		High	32.69	0.0385939	High
NDPNYDSDEEPYELVEAPVSTPVEDYKK	21	1	1	LOC_Os08g02690.1	MA3 domain containing protein, expressed	S7(Phospho)	3322.43	0	3.15045e+08	0			3.03673e+08		4.84444e+08	4.60691e+08		3.49244e+08		0.97875	Y(5): 2.1; S(7): 97.9; Y(12): 0.0; S(20): 0.0; T(21): 0.0; Y(26): 0.0	0	2.184e-09	370.142	High	33.64	0.0875624	High	31.67	0.137379	High	34.15	0.0778798	High	29.83		High	39.85	0.0210496	High	38.14	0.0310683	High	32.75		High	33.55		High
NDVEDGTANRSPDGQPK	37	2	1	LOC_Os06g36360.4	expressed protein	S11(Phospho)	1879.79	0	0	5.9279e+07								8.90099e+07	8.88272e+07	1	T(7): 0.0; S(11): 100.0	0	5.339e-07	553.925	High	10.55	9.56379	High	12.97	5.69006	High	15.67	3.08149	High	27.39		High	32.6		High	23.73		High	32.62		High	26.68		High
NEGSWSGSSHSSAAER	33	1	1	LOC_Os12g06670.1	protein kinase family protein, putative, expressed	S4(Phospho)	1728.66	6.85175e+07	9.92093e+06	6.0398e+07	74899714	5.62768e+07	7.43761e+07		1.64263e+07	1.33365e+07	7.48751e+07	3.68794e+07	6.94396e+07	1	S(4): 100.0; S(6): 0.0; S(8): 0.0; S(9): 0.0; S(11): 0.0; S(12): 0.0	0	1.889e-07	383.975	High	96.52	1.5911e-08	High	96.3	1.68667e-08	High	98.41	1.02823e-08				High	53.72	0.000305514	High	64.36	2.6182e-05	High	77.48	1.27377e-06	High	84.73	2.40438e-07	High
NESPTASSSAAASSNSK	5	1	1	LOC_Os08g01070.4	retrotransposon protein, putative, unclassified, expressed	S3(Phospho)	1675.69	1.744e+07	0	0	1.85004e+07	1.6337e+07	1.74825e+07							1	S(3): 100.0; T(5): 0.0; S(7): 0.0; S(8): 0.0; S(9): 0.0; S(13): 0.0; S(14): 0.0; S(16): 0.0	0	1.577e-07	313.366																			High	60.77	6.49504e-05	High	52.85	0.000399995	High
NETASDVDEAGQSTSSNIR	16	1	1	LOC_Os03g11890.1	potyvirus VPg interacting protein, putative, expressed	S5(Phospho)	2060.85	2.71122e+07	5.59437e+07	3.84427e+07	2.98295e+07	2.46919e+07	2.68151e+07	5.48447e+07	5.85984e+07	5.43878e+07	3.75709e+07	3.55326e+07	4.22246e+07	0.999888	T(3): 0.0; S(5): 100.0; S(13): 0.0; T(14): 0.0; S(15): 0.0; S(16): 0.0	0	1.733e-09	484.592	High	103.47	5.59301e-09	High	116.91	2.53714e-10	High	86.7	2.65214e-07	High	73.11	6.06173e-06	High	103.39	5.6718e-09	High	80.09	1.21065e-06	High	90.21	1.16813e-07	High	83.9	4.92115e-07	High
NETHGTSDDINENTPVER	10	1	1	LOC_Os09g19910.1	expressed protein	T14(Phospho)	2107.86	3.91277e+07	0	1.63515e+07	5.06223e+07	3.70697e+07	2.96913e+07				2.34505e+07	2.5604e+07		1	T(3): 0.0; T(6): 0.0; S(7): 0.0; T(14): 100.0	0	6.801e-07	477.831										High	27.02								High	44.99	0.00382408	High	49.42	0.00144688	High
NEVSPVAAGSGEDSGR	14	1	1	LOC_Os03g45300.1	transposon protein, putative, unclassified, expressed	S10(Phospho)	1611.67	1.17688e+07	4.12377e+07	0	1.8168e+07	1.71385e+07		4.05723e+07	3.80424e+07	4.50986e+07		2.52219e+07		0.999998	S(4): 0.0; S(10): 100.0; S(14): 0.0	0	0.001716	362.177	High	28.77	0.148735	High	22.12	0.708281	High	31.02	0.0887932	High	40.99	0.00913991	High	63.81	4.77465e-05	High	34.23	0.0433642	High	39.24	0.0136814	High	51.02	0.000918769
NFRPDSVLGEGGFGSVFK	10	3	1	LOC_Os05g02020.2	protein kinase APK1A, chloroplast precursor, putative, expressed	S6(Phospho)	1992.93	0	0	8.42319e+06		3.95604e+06					1.37551e+07	1.15145e+07		1	S(6): 100.0; S(15): 0.0	0	2.724e-06	306.499	High	20.1	1.58996	High	29.16	0.19572	High	22.08	1.00566				High	15.95					High	33.58		High	42.09	0.0101942
NHADGSSPSHLPGDK	59	1	1	LOC_Os12g17310.1	prefoldin, putative, expressed	S7(Phospho)	1598.66	1.47657e+08	0	0	2.22494e+08		2.20476e+08				1.59434e+08			0.497155	S(6): 49.7; S(7): 49.7; S(9): 0.6	0	0.000272	342.976	High	27.37	0.149242	High	30.64	0.0688225	High	28.92	0.10233	High	8.75		High	10.46		High	9.61		High	37.91	0.0125563	High	27.73		High
NHDESSDANDEKNETIAEDGTVDK	8	1	1	LOC_Os12g35620.1	expressed protein	S5(Phospho)	2713.08	2.02395e+07	0	0	3.23833e+07	2.83353e+07			2.82542e+07					0.984168	S(5): 98.4; S(6): 1.6; T(15): 0.0; T(21): 0.0	0	1.957e-06	290.313	High	23.26	0.638229										High	43.56	0.00550694				High	40.13	0.013	High	47.24	0.00258088
NHTSLLSDDEEEILEK	12	2	1	LOC_Os05g01990.2	DEAD-box ATP-dependent RNA helicase, putative, expressed	S7(Phospho)	1951.85	0	3.48609e+07	0				2.92104e+07	2.87122e+07	4.66601e+07		1.98081e+07		1	T(3): 0.0; S(4): 0.0; S(7): 100.0	0	9.818e-07	435.649	High	70.34	1.40138e-05	High	80.81	1.25266e-06	High	45.11	0.00482519	High	92.87	7.87535e-08	High	70.22	1.41973e-05	High	91.32	1.15408e-07				High	15.76		High
NIAVGSHQEVYHPGALK	35	1	1	LOC_Os03g05290.1	aquaporin protein, putative, expressed	S6(Phospho)	1899.92	2.15485e+08	9.95757e+08	0	313183016	3.33273e+08		9.63172e+08	1.03668e+09	9.87421e+08				1	S(6): 100.0; Y(11): 0.0	0	4.802e-06	482.952	High	25.49	0.429664	High	4.45	54.3408	High	24.79	0.501493	High	44.79	0.00499667	High	44.03	0.00594829	High	37.25	0.0286503	High	47.79	0.00250094	High	46.65	0.00327976	High
NIDNMDDNDGSSPDTSPR	7	1	1	LOC_Os08g41110.1	chaperone protein dnaJ 10, putative, expressed	T15(Phospho)	2029.75	2.60129e+07	0	0	19851678	2.86786e+07	2.95084e+07							0.497807	S(11): 0.0; S(12): 49.8; T(15): 49.8; S(16): 0.4	0	2.907e-09	418.102	High	40.44	0.00507399																High	47.45	0.00100917	High	54.82	0.000185076	High
NIESVSSSDSELAVQDQGSMPSK	34	1	1	LOC_Os02g02390.1	S1 RNA binding domain containing protein, expressed	S8(Phospho)	2475.06	0	8.00577e+07	9.47924e+07					1.32646e+08	1.07528e+08	1.00491e+08	9.39876e+07	8.98987e+07	0.964757	S(4): 0.0; S(6): 0.0; S(7): 1.7; S(8): 96.5; S(10): 1.7; S(19): 0.0; S(22): 0.0	0	1.428e-08	280.266	High	51.75	0.00125548	High	56.9	0.000382315	High	50.52	0.00166209	High	18.42		High	55.01	0.000613491	High	61.97	0.000125287							High
NKEESISEEEEEPENA	14	1	1	LOC_Os01g57630.1	pentatricopeptide containing protein, putative, expressed	S7(Phospho)	1942.75	7.5564e+07	0	7.35934e+07	8.33851e+07	8.08723e+07	6.24346e+07				7.59925e+07	6.80272e+07	7.67603e+07	0.990486	S(5): 1.0; S(7): 99.0	0	0.0004126	332.207	High	31.47	0.0530363	High	22.86	0.360513													High	32.06	0.0470459	High	34.23	0.0273929	High
NKSDMLDDSEDVPLK	10	1	1	LOC_Os07g39280.1	transporter-related, putative, expressed	S3(Phospho)	1785.77	0	8.37072e+07	5.79945e+07			6.09826e+07	9.82151e+07	1.52906e+08			8.80125e+07	8.59711e+07	1	S(3): 100.0; S(9): 0.0	0	6.634e-08	427.206	High	52.78	0.000630831	High	40.85	0.0097518	High	33.34	0.0510487	High	79.25	1.31151e-06	High	51.51	0.00082851	High	83.27	5.56931e-07							High
NLEADAAADHSDDDDARR	32	1	1	LOC_Os03g25720.1	GA20734-PA, putative, expressed	S11(Phospho)	2036.8	3.22471e+08	0	2.23742e+08	501582179	3.70341e+07	4.28796e+08	2.04101e+08			3.27768e+08	3.32939e+07	3.10164e+08	1	S(11): 100.0	0	5.024e-07	612.465	High	21.56	0.73873	High	26.09	0.2592	High	26.6	0.226433	High	33.34	0.049079	High	24.09		High	27.5		High	56.98	0.000207463	High	58	0.000169267	High
NLEEGGSTADKPLNR	17	3	1	LOC_Os07g05610.4	zinc ion binding protein, putative, expressed	S7(Phospho)	1680.76	6.11682e+07	1.3495e+08	1.05426e+08	6.23924e+07	5.83524e+07	6.27598e+07	1.41001e+08	1.24984e+08	1.38867e+08	1.13641e+08	9.40447e+07	1.08592e+08	0.99994	S(7): 100.0; T(8): 0.0	0	1.457e-06	519.006	High	49.42	0.00145374	High	52.06	0.000778809	High	72.29	7.58703e-06	High	70.48	1.1201e-05	High	68.64	1.75411e-05	High	65.38	3.62458e-05	High	57.29	0.000235164	High	63.73	5.32307e-05	High
NLLASVLR	15	1	1	LOC_Os05g47560.1	serine/threonine-protein kinase SNT7, chloroplast precursor, putative, expressed	S5(Phospho)	965.524	3.52398e+07	8.49845e+07	3.29844e+07	4.07655e+07	2.90627e+07	3.58913e+07	8.16384e+07	8.72071e+07	8.61081e+07	3.45542e+07	3.5186e+07	2.9213e+07	1	S(5): 100.0	0	0.007655	239.945	High	37.24	0.0131027	High	40.31	0.00643861	High	28.46	0.0985808	High	36.47	0.0156444	High	37.13	0.0134775	High	34.94	0.0222515	High	46.11	0.00193109	High	39.79	0.00837535	High
NLPDPDAEVIALSPK	9	1	1	LOC_Os04g47860.5	ZOS4-11 - C2H2 zinc finger protein, expressed	S13(Phospho)	1658.81	0	3.20128e+08	2.62607e+08				4.18065e+08	1.41413e+08	4.00908e+08	3.94978e+08		3.92844e+08	1	S(13): 100.0	0	3.34e-05	507.533	High	68.79	1.92579e-05	High	71.66	9.92803e-06	High	39.17	0.0177353	High	48.4	0.00210528	High	42.34	0.00854747	High	43.37	0.00672665
NLSGGLPTEPISVNPLIGR	6	2	1	LOC_Os08g23930.2	ENT domain containing protein, expressed	S3(Phospho)	2014.05	0	0	8.28804e+06		1.4433e+06				1.57789e+07	1.32348e+07		1.16293e+07	1	S(3): 100.0; T(8): 0.0; S(12): 0.0	0	1.394e-05	325.381	High	57.03	0.000211825	High	45.42	0.00301288										High	53.84	0.000419863				High	33.82	0.0333623
NLSLEELAGEVGLSPGR	12	1	1	LOC_Os05g34500.1	expressed protein	S14(Phospho)	1820.88	0	4.83196e+06	0			2.44501e+07	5.58295e+06	5.31805e+06	3.59487e+06				1	S(3): 0.0; S(14): 100.0	0	1.171e-05	410.281	High	60.39	0.000116641	High	49.63	0.00139002	High	46.91	0.00266649	High	65.43	3.73202e-05	High	67.85	2.1582e-05	High	60.64	0.000113352	High	25.41		High	32.7		High
NLSTPPPAIR	50	1	1	LOC_Os06g44890.1	villin protein, putative, expressed	S3(Phospho)	1145.57	5.67748e+08	4.14058e+08	8.77355e+08	6.55312e+08	5.7704e+08	4.70892e+08	4.89186e+08	3.754e+08	3.77589e+08	8.73247e+08	8.28257e+08	9.30561e+08	0.999999	S(3): 100.0; T(4): 0.0	0	0.003793	242.726	High	36.97	0.016133	High	36.86	0.0168663	High	49.4	0.000947801	High	43.7	0.00352141	High	49.3	0.000960479	High	49.41	0.000945621	High	49.34	0.000999984	High	49.46	0.000965371	High
NNAGEIIGTR	22	1	1	LOC_Os07g37240.1	chlorophyll A-B binding protein, putative, expressed	T9(Phospho)	1124.51	5.08301e+08	7.28584e+08	0	5.18846e+08	4.97195e+08	5.08861e+08	7.46173e+08	6.79716e+08	7.59863e+08	2.06709e+08			1	T(9): 100.0	0	0.02391	323.202	High	36.7	0.0174137	High	36.43	0.0184624	High	36.8	0.0169546	High	57.64	0.000140246	High	47.01	0.00163633	High	48.66	0.0011089	High	60.46	7.77166e-05	High	60.45	7.78957e-05	High
NNSMHSQEYLMR	13	2	1	LOC_Os01g73250.2	abscisic stress-ripening, putative, expressed	S3(Phospho)	1589.63	4.64429e+07	1.4999e+07	2.93615e+07	4.83776e+07	4.49253e+07	4.60258e+07		2.44824e+07	2.05144e+07	2.89577e+07	2.79277e+07	3.11993e+07	1	S(3): 100.0; S(6): 0.0; Y(9): 0.0	0	3.235e-05	313.737							High	44.64	0.00206135	High	18.34		High	32.84	0.0310178	High	32.82	0.0325192	High	73.16	3.04327e-06	High	61.03	5.09998e-05	High
NPAGVDSGDEGTAPGGR	13	1	1	LOC_Os09g37760.1	bromodomain domain containing protein, expressed	S7(Phospho)	1636.67	6.9657e+07	0	9.44253e+07	6.75392e+07	6.89768e+07	7.2455e+07				1.04477e+08	8.62952e+07	9.25038e+07	1	S(7): 100.0; T(12): 0.0	0	1.441e-09	574.423	High	88.2	1.3728e-07	High	83.97	3.62584e-07	High	78.21	1.35983e-06										High	57.18	0.00017257	High	80.49	8.06208e-07	High
NPDPSSPPHHGK	60	3	1	LOC_Os01g36860.1	DEAD-box ATP-dependent RNA helicase 40, putative, expressed	S6(Phospho)	1349.57	0	0	3.48961e+08		3.11583e+08					3.01751e+08	4.39159e+08	3.05974e+08	0.999999	S(5): 0.0; S(6): 100.0	0	0.002957	316.238	High	36.22	0.0200337	High	25.75	0.220707	High	29.54	0.0924405	High	25.05		High	29.57		High	30.19		High	20.77		High	33.55	0.0368491	High
NPSDLAAFFGPPSPSPSPSPAAR	24	1	1	LOC_Os06g01200.1	zinc finger, C3HC4 type domain containing protein, expressed	S13(Phospho)	2347.08	1.32403e+08	0	7.81468e+07	9.06102e+07	1.52939e+08	1.53659e+08				6.26134e+07	5.62885e+07	1.15539e+08	0.497128	S(3): 0.0; S(13): 49.7; S(15): 49.7; S(17): 0.6; S(19): 0.0	0	1.166e-09	516.29	High	44.26	0.00668764	High	33.42	0.0807376	High	45.92	0.00446601										High	68.46	2.47343e-05	High	59.08	0.000221667	High
NQPGNPNPDAEVVALSPHTLLATNR	15	2	1	LOC_Os08g44050.3	ZOS8-12 - C2H2 zinc finger protein, expressed	S16(Phospho)	2705.32	0	0	1.45634e+08							2.50739e+08		1.86162e+08	0.999997	S(16): 100.0; T(19): 0.0; T(23): 0.0	0	8.652e-10	459.03	High	16.33	3.62367	High	15.79	4.19045	High	13.68	6.50322	High	22.64		High	18.51		High	22.78		High	30.25		High	34.69		High
NQSALVAR	24	1	1	LOC_Os03g20980.1	zinc finger, C3HC4 type domain containing protein, expressed	S3(Phospho)	938.449	2.60203e+07	6.15339e+07	3.14006e+07	3.76606e+07		4.04002e+07	6.71444e+07	5.50731e+07	6.23841e+07	5.20124e+07	4.21894e+07		1	S(3): 100.0	0	0.01553	200.557	High	35.67	0.0250286	High	33.88	0.0374269				High	34.85	0.0299353	High	38.25	0.0140871	High	36.85	0.0188879	High	34.78	0.0303552	High	23.4		High
NQTPKPPATGSP	66	1	1	LOC_Os01g63940.1	Transcription initiation factor TFIID subunit A containing protein, expressed	S11(Phospho)	1274.58	2.74774e+08	5.61524e+07	1.3799e+08	342405775	1.96185e+08	2.85731e+08	7.54504e+07	4.76043e+07	4.54025e+07		2.02279e+08	2.11691e+08	1	T(3): 0.0; T(9): 0.0; S(11): 100.0	0	3.774e-07	408.123	High	55.65	0.000228843	High	53.03	0.000415859	High	53.96	0.000337705	High	39.94	0.00861825	High	34.41	0.0303922	High	36.35	0.0198485	High	54.77	0.000277744	High	54.6	0.00029594	High
NRLSENTEIQSAK	67	2	1	LOC_Os04g23890.4	AGC_PVPK_like_kin82y.10 - ACG kinases include homologs to PKA, PKG and PKC, expressed	S4(Phospho)	1569.73	2.27625e+09	4.76678e+08	8.00837e+08	2.35965e+09	2.13592e+09	2.33317e+09	4.75862e+08	4.57432e+08	4.9674e+08	8.37208e+08	7.54795e+08	8.10507e+08	1	S(4): 100.0; T(7): 0.0; S(11): 0.0	0	3.303e-06	511.095	High	70.14	1.23988e-05	High	56.61	0.000278953	High	59.65	0.000137117	High	56.03	0.000320431	High	56.51	0.000286009	High	62.62	7.00454e-05	High	70.64	1.10418e-05	High	72.39	7.4028e-06	High
NSPGYQTPVYVEQPR	12	1	1	LOC_Os03g52490.1	nucleic acid binding protein, putative, expressed	T7(Phospho)	1814.82	1.60139e+07	0	0	26857360		2.11845e+07		4.22186e+07			2.4246e+07		0.999999	S(2): 0.0; Y(5): 0.0; T(7): 100.0; Y(10): 0.0	0	1.407e-06	362.678										High	42.09	0.00867386	High	47.27	0.00279562	High	29.22		High	73.63	6.37044e-06	High	33.9		High
NSSANEQGCEGDNIGK	14	1	1	LOC_Os02g50840.1	BAH domain containing protein, putative, expressed	S3(Phospho); C9(Carbamidomethyl)	1759.66	1.35415e+07	0	1.41647e+07		2.66547e+07	1.39699e+07				1.83842e+07		2.41098e+07	0.9905	S(2): 0.9; S(3): 99.1	0	1.841e-08	361.648				High	61.62	4.77925e-05	High	61.97	4.18683e-05													High	46.58	0.00145828	High
NSSFDTVDDER	6	1	1	LOC_Os03g21640.1	expressed protein	S3(Phospho)	1364.5	0	0	1.49741e+07	1.51863e+07			1.93006e+07			2.42517e+07	2.06706e+07		1	S(2): 0.0; S(3): 100.0; T(6): 0.0	0	3.52e-12	301.493										High	45.62	0.00176557	High	28.77					High	35.64	0.0167559
NSSPHLVIPLPTISGEFIQSPK	55	3	1	LOC_Os10g41030.3	agenet domain containing protein, putative, expressed	S20(Phospho)	2441.27	7.48143e+08	3.17397e+08	6.95417e+08	3.70482e+08	8.25732e+08	1.04821e+09	3.86105e+08	4.29542e+08	1.36543e+08	7.75882e+08	7.34384e+08	5.75984e+08	1	S(2): 0.0; S(3): 0.0; T(12): 0.0; S(14): 0.0; S(20): 100.0	0	2.085e-11	497.249	High	60.46	0.000111987	High	61.54	8.75065e-05	High	63.14	6.03214e-05	High	59.76	0.000131785	High	65.16	3.75196e-05	High	64.25	4.63408e-05	High	69.15	8.68357e-06	High	59.23	8.52508e-05	High
NSSPHLVIPLPTISGEFIQSPK	29	3	1	LOC_Os10g41030.3	agenet domain containing protein, putative, expressed	S2(Phospho); S20(Phospho)	2521.22	0	5.66115e+06	0					9.63614e+06	7.34731e+06	2.97113e+07			0.5	S(2): 50.0; S(3): 50.0; T(12): 0.0; S(14): 0.0; S(20): 100.0	0	1.503e-06	467.784	High	17.27	3.47343				High	34.01	0.0741358				High	53.2	0.000899825	High	45.25	0.00555281	High	14.84		High	13.11		High
NSSTGAAPVENPVITR	18	1	1	LOC_Os02g56210.1	hydrolase, NUDIX family, domain containing protein, expressed	S3(Phospho)	1692.81	3.62201e+07	0	5.05459e+07		3.81259e+07	7.05345e+07				7.54069e+07	7.62309e+07		0.989551	S(2): 1.0; S(3): 99.0; T(4): 0.0; T(15): 0.0	0	3.816e-16	337.969				High	43.37	0.00640217	High	48.76	0.00188326				High	25.52		High	38.42	0.020323	High	32.13		High	43.66	0.00574538	High
NSVSSPIITR	24	1	1	LOC_Os08g45030.1	multidrug resistance protein, putative, expressed	S5(Phospho)	1153.57	1.46071e+08	0	0	146805001	1.46349e+08	1.45059e+08	3.44085e+08					2.58075e+08	0.999999	S(2): 0.0; S(4): 0.0; S(5): 100.0; T(9): 0.0	0	0.001537	268.622	High	25.13	0.331454	High	25.83	0.28995	High	23.5	0.491352	High	36.37	0.0248898	High	32.77		High	27.39		High	40.82	0.0089128	High	39.57	0.0118523	High
NTDNVEISHGSSSGDK	18	2	1	LOC_Os03g14000.2	acyl CoA binding protein, putative, expressed	S11(Phospho)	1726.69	2.15106e+07	4.70417e+07	2.6226e+07	21416937	2.33714e+07	1.97435e+07	4.3183e+07	4.30437e+07	5.48985e+07	2.75793e+07	2.31181e+07	2.79808e+07	0.991758	T(2): 0.0; S(8): 0.0; S(11): 99.2; S(12): 0.8; S(13): 0.0	0	3.157e-07	421.928	High	30.3	0.0908056	High	42.05	0.00606894	High	36.76	0.0208965	High	75.19	2.99967e-06	High	83.94	3.94362e-07	High	78.02	1.56499e-06	High	65.5	2.77752e-05	High	98	1.57063e-08	High
NTSFGGAGSNSGPVSNALGR	3	2	1	LOC_Os08g13350.2	expressed protein	S3(Phospho); S11(Phospho)	2009.81	5.44602e+06	0	0	1.05598e+07		5.77825e+06							0.999402	T(2): 0.1; S(3): 99.9; S(9): 0.0; S(11): 100.0; S(15): 0.0	0	1.82e-05	334.662																			High	47.54	0.002391				High
NVNASPASPPAATSDVTR	9	1	1	LOC_Os07g37140.1	expressed protein	S8(Phospho)	1834.84	0	4.63486e+07	4.16397e+07				5.31573e+07	1.68174e+07	6.9071e+07	2.82246e+07	4.64708e+07	5.02237e+07	1	S(5): 0.0; S(8): 100.0; T(13): 0.0; S(14): 0.0; T(17): 0.0	0	5.5e-07	542.177										High	72.68	7.09996e-06	High	66.2	3.17845e-05	High	65.69	3.69725e-05
NVSPAEQSAADK	19	1	1	LOC_Os06g44210.1	protein phosphatase 2C, putative, expressed	S3(Phospho)	1296.55	0	5.84261e+07	0		5.99992e+07		9.18264e+07	8.34518e+07		7.11653e+07			1	S(3): 100.0; S(8): 0.0	0	6.585e-05	279.06	High	37.16	0.0198078	High	34.43	0.0358956	High	31.09	0.0806435	High	37.47	0.0178613	High	43.85	0.00423636	High	21.11		High	29.34		High	43.07	0.00507969	High
NVVIEQSYGSPK	8	1	1	LOC_Os10g32550.1	T-complex protein, putative, expressed	S10(Phospho)	1400.65	0	0	2.23986e+08							3.3708e+08	3.3488e+08		1	S(7): 0.0; Y(8): 0.0; S(10): 100.0	0	0.001064	319.817	High	42.04	0.00986835	High	59.58	0.000181148	High	43.1	0.00805441
NWHSNPASSGEK	32	3	1	LOC_Os02g08544.2	homeobox protein knotted-1, putative, expressed	S8(Phospho)	1393.56	7.30002e+07	0	0		1.184e+08	1.00601e+08					6.88142e+07		0.999937	S(4): 0.0; S(8): 100.0; S(9): 0.0	0	0.00195	332.151	High	17.38	1.22666	High	27.05	0.134322	High	31.57	0.0469526	High	29.75		High	25.64		High	24.43		High	30.21		High	32.15	0.0410828	High
PLAESPQWR	9	1	1	LOC_Os07g30300.1	small G protein family protein, putative, expressed	S5(Phospho)	1163.53	4.6116e+07	0	5.70521e+07	4.5008e+07	4.53252e+07	4.80149e+07				6.22661e+07	5.91292e+07	4.9761e+07	1	S(5): 100.0	0	0.001726	252.817																			High	37.39	0.0191691	High	50.73	0.000906984	High
PPTSVSPPR	24	1	1	LOC_Os10g08580.1	FAD binding domain of DNA photolyase domain containing protein, expressed	S6(Phospho)	1017.48	0	2.73251e+07	2.55452e+07	3.03887e+07			2.76803e+07	5.42949e+07		3.25554e+07	1.83184e+07	2.57618e+07	0.999932	T(3): 0.0; S(4): 0.0; S(6): 100.0	0.001	0.01516	249.508	High	28.59	0.114836	High	23.61	0.31923				High	35.37	0.0212865	High	32.63	0.0395402	High	28.94		High	34.31	0.0276342
PRSLAGDLTDPEMAQPYMK	9	1	1	LOC_Os03g12590.1	coatomer subunit gamma-1, putative, expressed	S3(Phospho)	2199.99	1.93863e+07	0	0		4.67841e+07	1.13749e+07							1	S(3): 100.0; T(9): 0.0; Y(17): 0.0	0	1.158e-07	535.227				High	17.39	3.18908	High	11.37	12.7217										High	30.96		High	42.34	0.0102453	High
QAGGPATSGDSDK	19	1	1	LOC_Os09g37910.1	HMG1/2, putative, expressed	S8(Phospho)	1270.5	3.31711e+06	0	0	3.99632e+06	5.95501e+06						8.17911e+06		0.988013	T(7): 0.0; S(8): 98.8; S(11): 1.2	0	4.033e-10	308.735	High	32.36	0.0303159				High	33.5	0.0228925	High	21.23		High	22.22		High	24.72		High	34.56	0.0179347	High	42.44	0.00298481	High
QDGDEVVDSNVLQYCSIDGK	6	2	1	LOC_Os03g64020.2	expressed protein	C15(Carbamidomethyl); S16(Phospho)	2320.96	0	0	3.42809e+07							3.36568e+07	3.82663e+07	3.09197e+07	1	S(9): 0.0; Y(14): 0.0; S(16): 100.0	0	2.852e-08	475.997	High	52.88	0.000928184	High	40.42	0.0165768	High	61.08	0.000138264
QDSFACTEPPPVR	16	1	1	LOC_Os02g48640.1	expressed protein	S3(Phospho); C6(Carbamidomethyl)	1583.66	1.02525e+07	0	1.16388e+07		2.15874e+07	9.17014e+06				1.33139e+07	2.16024e+07		1	S(3): 100.0; T(7): 0.0	0	1.873e-05	282.87	High	28.19	0.161262	High	15.98	2.45535										High	28.08		High	28.51		High	33.31	0.0490692	High
QDSFAIGELR	7	1	1	LOC_Os02g48640.1	expressed protein	S3(Phospho)	1215.54	2.2261e+07	0	0	2.23362e+07	2.26186e+07	2.18282e+07							1	S(3): 100.0	0	3.161e-05	241.446	High	63.19	3.75631e-05																High	42.39	0.00451608	High	48.94	0.000981581	High
QDSFGVELVR	9	1	1	LOC_Os02g48640.1	expressed protein	S3(Phospho)	1229.56	0	1.85312e+07	0	2.93552e+07				3.17904e+07	2.38031e+07				1	S(3): 100.0	0	3.227e-06	226.925	High	14.63	3.05783				High	19.24	1.01553				High	33.05	0.0397847	High	45.22	0.00266338	High	64.41	3.02835e-05	High	58.47	0.00011976
QEAGSPQSPLGGK	15	2	1	LOC_Os08g14460.2	expressed protein	S8(Phospho)	1335.6	8.27564e+07	0	0		1.1839e+08	1.29879e+08						4.29359e+07	1	S(5): 0.0; S(8): 100.0	0	0.0006881	365.981	High	28.82	0.14736	High	1.39	78.7099	High	22.06	0.668662				High	24.28		High	16.77					High	42.93	0.00546767	High
QEAGSPQSPLGGK	16	2	1	LOC_Os08g14460.2	expressed protein	S5(Phospho); S8(Phospho)	1415.56	7.66683e+07	0	0	7.55034e+07	8.7927e+07	6.65745e+07							1	S(5): 100.0; S(8): 100.0	0	0.0001347	402.052	High	20.75	0.622212													High	13.52		High	37.54	0.0142456	High	33.88	0.031022	High
QETLVGSDQGGAK	17	1	1	LOC_Os07g04530.1	GYF domain containing protein, putative, expressed	S7(Phospho)	1369.6	5.26141e+07	0	0		7.93791e+07	7.84632e+07						9.01915e+07	1	T(3): 0.0; S(7): 100.0	0	5.074e-06	301.686	High	27.18	0.166349	High	21.69	0.566847	High	14.46	3.06889				High	21.85		High	16.2		High	22.65		High	48	0.0014058	High
QEVAPQDEASADSPAVK	17	1	1	LOC_Os07g49380.1	PWWP domain containing protein, expressed	S13(Phospho)	1821.79	5.7189e+07	0	2.56288e+07	5.72845e+07	5.45861e+07	5.96964e+07		5.15683e+07		4.11919e+07		3.56944e+07	1	S(10): 0.0; S(13): 100.0	0	1.809e-06	476.227	High	49.22	0.00157312	High	40.59	0.0114316	High	32.17	0.0817881	High	29.13		High	45.5	0.0037414	High	31.15		High	54.15	0.000495354	High	38.99	0.0165236	High
QGEDVDLSSSSR	39	1	1	LOC_Os05g08370.1	CESA1 - cellulose synthase, expressed	S10(Phospho)	1359.55	1.06082e+08	0	0	1.118e+08	1.00472e+08	1.05974e+08	2.35292e+07						0.495189	S(8): 0.5; S(9): 49.5; S(10): 49.5; S(11): 0.5	0	1.309e-05	297.484										High	31.32	0.0468569	High	14.07		High	15.32		High	52.32	0.000340839	High	49.22	0.000698298	High
QGLDTEMPLSPQWLMK	13	1	1	LOC_Os07g04530.1	GYF domain containing protein, putative, expressed	S10(Phospho)	1953.89	1.82413e+07	1.50068e+07	0	2.63425e+07		2.83814e+07	2.21303e+07	1.29145e+07	9.97554e+06	2.83182e+07			1	T(5): 0.0; S(10): 100.0	0	8.478e-06	339.236	High	21.12	1.14666	High	28.77	0.193202	High	22.09	0.900141	High	48.46	0.00211631	High	45.82	0.00392204	High	53.71	0.000637759	High	53.07	0.000754063				High
QGNQEGQMTAETGTYR	13	3	1	LOC_Os08g01270.3	protein kinase family protein, putative, expressed	T9(Phospho)	1850.74	1.73595e+07	4.51629e+07	3.49683e+07	2.74365e+07	2.4642e+07		4.36455e+07	4.65448e+07	4.52983e+07	3.91696e+07	3.17957e+07	3.39397e+07	0.999871	T(9): 100.0; T(12): 0.0; T(14): 0.0; Y(15): 0.0	0	1.601e-05	334.028							High	29.51	0.104779	High	39.29	0.0109988	High	35	0.0290613	High	42.87	0.00475619	High	46.39	0.00215379	High	45.51	0.00263616	High
QGSITMPPELSK	13	2	1	LOC_Os05g41070.1	bZIP transcription factor, putative, expressed	S3(Phospho)	1367.63	0	0	3.39118e+07							6.59834e+07		3.5752e+07	1	S(3): 100.0; T(5): 0.0; S(11): 0.0	0	0.001398	239.601										High	27.44		High	24.64		High	23.73		High	23.46		High	21.66		High
QGSLHVNIPDQDPEDAK	15	1	1	LOC_Os06g40510.1	CRAL/TRIO domain containing protein	S3(Phospho)	1942.86	3.65796e+07	3.57791e+07	0	3.88902e+07	3.34165e+07	3.74321e+07		6.15419e+07	4.57955e+07			2.50952e+07	1	S(3): 100.0	0	2.857e-06	368.609	High	37.58	0.0259255	High	36.49	0.0350719	High	38.02	0.0247291	High	52	0.000964418	High	65.6	4.14098e-05	High	53.46	0.000667434	High	38.13	0.0231954	High	36.14	0.0364709	High
QGSLTLPR	35	5	3	LOC_Os09g28310.1 ;LOC_Os06g10880.2 ;LOC_Os08g36790.1	bZIP transcription factor, putative, expressed	S3(Phospho)	951.468	6.64981e+07	1.83154e+08	3.1479e+08	66082184	6.65481e+07	6.68639e+07	1.17501e+08	2.48216e+08	1.83745e+08	3.17027e+08	3.88819e+08	2.38525e+08	0.999999	S(3): 100.0; T(5): 0.0	0	0.01054	170.605										High	58.1	0.000105242	High	53.17	0.000327484	High	57.27	0.000127406	High	38.72	0.00892267	High	41.97	0.00427895	High
QGSYGVELVR	15	1	1	LOC_Os02g48640.1	expressed protein	S3(Phospho)	1187.55	6.59222e+07	0	4.3106e+07	6.55705e+07	6.4939e+07	6.72572e+07				7.26972e+07	5.66208e+07		0.999914	S(3): 100.0; Y(4): 0.0	0	8.362e-05	213.361	High	40	0.00855	High	24.45	0.314416	High	41.85	0.00550589	High	25.97					High	29.54		High	46.89	0.00180087	High	44.06	0.00345528	High
QHGGEMMSGSPLGSPAAGGMAR	50	2	1	LOC_Os03g61150.3	expressed protein	S10(Phospho); S14(Phospho)	2245.87	0	2.37602e+08	4.62695e+08				2.63463e+08	2.5518e+08	1.94163e+08	5.50736e+08	4.15261e+08	4.22089e+08	0.981424	S(8): 1.9; S(10): 98.1; S(14): 100.0	0	2.281e-05	388.053	High	21.81	0.659503	High	54	0.000394524	High	41.83	0.00662051	High	33.66	0.0351525	High	51.03	0.000684336	High	38.41	0.0124959	High	28.9		High	25.02		High
QITLSELK	19	1	1	LOC_Os04g52460.1	retrotransposon protein, putative, unclassified, expressed	T3(Phospho)	1011.51	4.70744e+07	0	0	7.47154e+07	6.65079e+07		2.66389e+07			4.40778e+07			0.999922	T(3): 100.0; S(5): 0.0	0	0.01495	168.845	High	26.02	0.241908	High	44.67	0.0029752	High	40.13	0.0067596	High	33.51	0.0432509	High	18.71		High	28.52		High	39.41	0.0112718	High	44.51	0.0034497	High
QKPESPPHAHPQGR	31	1	1	LOC_Os06g29430.1	cytidine and deoxycytidylate deaminase zinc-binding region family protein, expressed	S5(Phospho)	1645.76	0	0	5.74737e+07		6.54155e+07			5.89327e+07		7.68275e+07	2.681e+07	6.87836e+07	1	S(5): 100.0	0	1.674e-08	276.361	High	31.33	0.129462	High	26.39	0.394478	High	32.36	0.0996301	High	26.96		High	40.73	0.0147882	High	23.28		High	31.36		High	38.2	0.026616	High
QLLESGSSSGR	13	1	1	LOC_Os08g41820.1	exo70 exocyst complex subunit domain containing protein, expressed	S7(Phospho)	1200.52	4.77052e+07	0	1.6246e+07	5.49034e+07	4.68869e+07	4.13253e+07					2.47302e+07	2.40078e+07	0.979407	S(5): 1.0; S(7): 97.9; S(8): 1.0; S(9): 0.0	0	0.001574	233.643				High	40.93	0.00555781							High	31.07					High	37.27	0.0129468	High	35.24	0.0208112	High
QLSLEPVYTPR	10	2	1	LOC_Os02g39560.2	non-receptor tyrosine kinase spore lysis A, putative, expressed	S3(Phospho)	1382.68	8.23233e+07	0	0	9.21962e+07	7.65528e+07	7.82208e+07							1	S(3): 100.0; Y(8): 0.0; T(9): 0.0	0	0.0001251	293.012				High	23.66	0.745242	High	16.77	3.60377				High	13.5					High	43.16	0.00838349	High	43.18	0.00829448	High
QLSLPAASK	22	2	1	LOC_Os09g31300.2	helix-loop-helix DNA-binding domain containing protein, expressed	S3(Phospho)	994.5	0	3.30117e+07	6.51228e+07		2.47492e+07		1.43572e+07	5.34575e+07	3.12205e+07	9.39388e+07	7.0162e+07	3.12676e+07	1	S(3): 100.0; S(8): 0.0	0	0.001065	194.972	High	22.73	0.374668	High	34.84	0.0217199	High	22.76	0.350637	High	52.79	0.000344541	High	49.66	0.000751597	High	42.05	0.00440357	High	29.66		High	37.38	0.0130801	High
QLSLSPGPK	15	1	1	LOC_Os02g46830.1	expressed protein	S3(Phospho)	1006.5	8.91817e+07	0	4.91713e+07	1.3607e+08		1.31475e+08				7.96418e+07		6.7872e+07	0.999873	S(3): 100.0; S(5): 0.0	0	0.006488	187.613	High	8.38	10.8691	High	16.19	1.79967	High	15.43	2.12952	High	14.24		High	30.53		High	23.7		High	42.27	0.00442915	High	14.56		High
QLSPLNR	14	1	1	LOC_Os03g24339.1	PWWP domain containing protein, expressed	S3(Phospho)	907.44	0	2.15381e+07	2.46467e+07		3.30051e+07			3.29807e+07	3.16335e+07	4.20294e+07	3.19106e+07		1	S(3): 100.0	0.001	0.0173	190.028	High	27.76	0.0994079	High	31.2	0.0448319	High	32.39	0.0337985				High	34.91	0.0192741	High	45.83	0.00156077	High	27.63		High	46.4	0.00135963	High
QLSVHDNR	14	1	1	LOC_Os06g13820.1	dynamin, putative, expressed	S3(Phospho)	1048.46	3.45883e+08	1.62379e+08	0	3.50122e+08	3.50359e+08	3.37168e+08	2.58003e+08	2.29135e+08		2.64665e+08			1	S(3): 100.0	0	0.004447	280.019	High	29.12	0.0916625	High	27.32	0.138181	High	41	0.00594952	High	38.1	0.0116006	High	40.25	0.0070663				High	40.34	0.00688438	High	47.06	0.00147985	High
QMSINSVPK	16	2	1	LOC_Os12g42310.1	serine/threonine-protein phosphatase BSL2, putative, expressed	S3(Phospho)	1083.5	3.98615e+08	0	1.75195e+08	2.87789e+08	4.20666e+08	4.87389e+08				2.70995e+08	2.54589e+08		1	S(3): 100.0; S(6): 0.0	0	0.006019	189.306	High	37.72	0.0128558							High	29.81		High	31.24		High	31.24		High	36.8	0.015722	High	36.71	0.0162218	High
QNSLGLWK	17	1	1	LOC_Os07g30774.1	calmodulin-binding transcription activator 5, putative, expressed	S3(Phospho)	1025.49	3.35756e+07	9.03287e+07	3.91877e+07	6.04245e+07	4.03022e+07		1.02384e+08	9.16784e+07	7.69238e+07	6.48519e+07	5.27112e+07		1	S(3): 100.0	0	0.01653	189.253				High	36.32	0.0262747	High	29.01	0.161714	High	40.59	0.011257	High	41.1	0.00990103	High	40.58	0.0112654	High	38.85	0.0165698	High	42.63	0.00695568	High
QNSLSFTSSVDEAR	29	3	1	LOC_Os02g48000.3	TBC domain containing protein, expressed	S3(Phospho)	1620.69	1.84713e+07	0	3.59188e+07	1.96977e+07	2.6103e+07	9.61327e+06		6.51491e+06		4.91788e+07	1.67347e+07	4.1843e+07	1	S(3): 100.0; S(5): 0.0; T(7): 0.0; S(8): 0.0; S(9): 0.0	0	2.228e-07	357.676				High	89.15	1.19308e-07	High	78.25	1.491e-06	High	52.27	0.000587293	High	54.85	0.00033045	High	55.72	0.000265506	High	71.7	6.77097e-06	High	49.66	0.00108954	High
QNSPNNQLTGEGSLSGNAR	9	1	1	LOC_Os06g43840.1	protein kinase domain containing protein, expressed	S15(Phospho)	2023.89	1.49601e+07	0	0		2.44291e+07	2.04512e+07							0.999863	S(3): 0.0; T(9): 0.0; S(13): 0.0; S(15): 100.0	0	3.17e-07	403.067	High	56.35	0.000360239	High	66.89	3.21394e-05	High	73.83	6.40043e-06													High	43.2	0.00758389	High
QPIEDETWFLAHEIDYPSDNEK	8	1	1	LOC_Os03g51020.1	expressed protein	S18(Phospho)	2756.18	1.32747e+07	0	0		5.41368e+06	3.44104e+07	2.7751e+07						0.999991	T(7): 0.0; Y(16): 0.0; S(18): 100.0	0	0.009442	260.659				High	28.82	0.229176	High	28.15	0.268553	High	37.82	0.0289424	High	22.37					High	33.06		High	53.69	0.000764696	High
QPSPPPVLAELER	58	2	1	LOC_Os01g23640.2	mov34/MPN/PAD-1 family protein, expressed	S3(Phospho)	1512.76	8.54392e+06	9.36501e+06	5.00274e+07	13733848	7.35836e+06	4.53956e+06	1.69019e+07	5.01175e+06	6.18135e+06	6.78007e+07	3.74139e+07	4.48676e+07	1	S(3): 100.0	0	0.0003822	256.977	High	50.1	0.0013437	High	50.05	0.00136816	High	50.38	0.00125064	High	53.9	0.000584591	High	48.28	0.0020335	High	49.72	0.00153856	High	34.72	0.042768	High	46.26	0.00364233	High
QPSSTFFTPSTTPK	16	1	1	LOC_Os08g43680.1	glutathione S-transferase, C-terminal domain containing protein, expressed	S3(Phospho)	1605.72	2.47117e+07	0	0	3.30314e+07	1.25271e+07	2.85765e+07				2.51122e+07			0.986766	S(3): 98.7; S(4): 1.3; T(5): 0.0; T(8): 0.0; S(10): 0.0; T(11): 0.0; T(12): 0.0	0	3.078e-05	193.302																			High	38.88	0.019167	High	39.02	0.018465	High
QPTSGVASWFPQSPGGR	8	3	1	LOC_Os10g41030.3	agenet domain containing protein, putative, expressed	S13(Phospho)	1838.82	5.41588e+07	0	0	8.09685e+07	2.92238e+07	5.2284e+07							1	T(3): 0.0; S(4): 0.0; S(8): 0.0; S(13): 100.0	0	5.633e-05	284.952																			High	38.71	0.0189363	High	41.31	0.0105727	High
QQAQAQAQQVGTPR	19	1	1	LOC_Os06g50030.1	CAMK_CAMK_like.30 - CAMK includes calcium/calmodulin depedent protein kinases, expressed	T12(Phospho)	1590.74	1.17004e+08	0	1.48402e+08	1.02756e+08		2.48255e+08					2.14452e+08	2.30753e+08	1	T(12): 100.0	0	1.69e-05	325.024	High	22.98	0.864259	High	25.17	0.522424	High	28.26	0.260343	High	24.32		High	24.41		High	26.37		High	37.55	0.0302451	High	33.86		High
QQFSMTSLER	17	1	1	LOC_Os04g55220.1	C2 domain containing protein, expressed	S4(Phospho)	1306.55	7.45127e+07	1.05165e+08	0	7.81788e+07	7.41196e+07	7.12397e+07	1.63849e+08		1.51645e+08			9.26441e+07	1	S(4): 100.0; T(6): 0.0; S(7): 0.0	0	0.0008229	303.738	High	30.59	0.151766	High	30	0.17365	High	30.14	0.168335	High	46.15	0.00421138	High	26.66		High	46.11	0.00427117	High	34.95	0.0298457	High	33.87	0.0366722	High
QQHAASPNPGGGGGGR	5	1	1	LOC_Os04g36790.1	transcription factor like protein, putative, expressed	S6(Phospho)	1527.64	0	0	4.51282e+06							5.32463e+06		8.21383e+06	1	S(6): 100.0	0	0.0008058	275.191																High	10.41		High	19.43
QQQPASPELQKPAENK	49	4	1	LOC_Os08g12760.4	YT521-B, putative, expressed	S6(Phospho)	1872.89	3.25201e+08	0	1.82289e+08	4.14129e+08	2.82942e+08	2.78532e+08				2.80051e+08		2.66816e+08	1	S(6): 100.0	0	2.52e-05	376.399	High	30.17	0.135587	High	29.61	0.147903	High	27.84	0.220181	High	14.91		High	10.63		High	4.78		High	38.65	0.0192065	High	38.84	0.0176594	High
QQSEHLQQAEK	12	1	1	LOC_Os02g02290.1	SNF2 family N-terminal domain containing protein, expressed	S3(Phospho)	1405.61	2.98822e+07	0	2.08903e+07	3.20447e+07	2.99e+07	2.77019e+07				3.95237e+07		2.31473e+07	1	S(3): 100.0	0	7.989e-05	284.291	High	30.02	0.0989433	High	58.95	0.000125376	High	27.68	0.15858										High	55.56	0.000275331	High	48.89	0.00128735	High
QQSIHPPPAFGSSTNLEALALEASK	52	2	1	LOC_Os09g37230.1	protein kinase family protein, putative, expressed	S3(Phospho); S13(Phospho)	2753.26	4.41193e+07	1.11132e+08	1.23672e+08	64609609	6.77484e+07		1.16542e+08	1.1602e+08	1.00833e+08	1.38423e+08	1.11825e+08	1.20767e+08	0.495097	S(3): 100.0; S(12): 49.5; S(13): 49.5; T(14): 1.0; S(24): 0.0	0	8.446e-09	323.099	High	61.21	0.000148604	High	57.19	0.000380634	High	85.52	5.68241e-07	High	46.71	0.00440367	High	77.97	3.1359e-06	High	86.08	4.85933e-07	High	104.02	7.87404e-09	High	59.45	0.000222859	High
QQSIHPPPAFGSSTNLEALALEASK	11	2	1	LOC_Os09g37230.1	protein kinase family protein, putative, expressed	S3(Phospho)	2673.31	0	0	3.32567e+07			6.95581e+06					5.51206e+07	4.46495e+07	1	S(3): 100.0; S(12): 0.0; S(13): 0.0; T(14): 0.0; S(24): 0.0	0	3.816e-16	294.33	High	62.32	8.80673e-05	High	66.95	3.08305e-05	High	82.94	7.65796e-07																High
QQSLNMR	14	2	1	LOC_Os11g10070.1	transcriptional corepressor SEUSS, putative, expressed	S3(Phospho)	956.405	3.10867e+08	0	0	3.19921e+08	3.148e+08	2.97882e+08	3.67275e+08				2.37723e+08		1	S(3): 100.0	0	0.006728	176.411	High	34.19	0.0226353							High	52.82	0.000321274							High	47.27	0.00106125	High	57.86	0.000100828	High
QRSSVDDDLYDHPK	30	1	1	LOC_Os08g06070.1	ELF7, putative, expressed	S4(Phospho)	1754.74	0	0	5.90859e+07		4.65838e+07			9.28885e+07			8.43709e+07	9.28868e+07	0.5	S(3): 50.0; S(4): 50.0; Y(10): 0.0	0	3.816e-16	286.28	High	37.43	0.0239541	High	33.03	0.0665474	High	47.17	0.00255854	High	33.73		High	36.03	0.0330659	High	37.05	0.0259867	High	25.18		High	38.02	0.020856	High
QSHSDGSLDTMAR	33	1	1	LOC_Os02g50550.1	dynamin, putative, expressed	S4(Phospho)	1484.59	1.04471e+08	6.67079e+07	1.90974e+08	1.60812e+08	1.526e+08		1.07087e+08		9.30373e+07	2.1608e+08	1.83911e+08	1.72929e+08	1	S(2): 0.0; S(4): 100.0; S(7): 0.0; T(10): 0.0	0	0.0001162	325.619	High	48.89	0.000894169	High	43.9	0.00279667	High	50.12	0.0006746	High	37.78	0.0139465	High	29.79		High	40.92	0.00557872	High	41.3	0.00508909	High	39.95	0.00853267	High
QSNSDGALDTMAR	10	1	1	LOC_Os06g13820.1	dynamin, putative, expressed	S4(Phospho); M11(Oxidation)	1461.56	0	0	7.75778e+07	2.92397e+07						8.43697e+07	6.6652e+07	8.17116e+07	1	S(2): 0.0; S(4): 100.0; T(10): 0.0	0	3.816e-16	309.168	High	55.58	0.000240724	High	66.89	1.72208e-05	High	50.54	0.000755916										High	65.82	2.16131e-05
QSSMAPDR	11	2	1	LOC_Os01g54480.2	serine/threonine protein kinase, putative, expressed	S3(Phospho)	971.366	1.33669e+07	0	1.8218e+07	20664147		1.94366e+07		2.98242e+07		2.79959e+07	2.66581e+07		0.999918	S(2): 0.0; S(3): 100.0	0	0.009231	167.897				High	40.49	0.0021082	High	18.74	0.344173	High	13.29		High	36.37	0.00538625	High	18.55		High	40.88	0.00200879				High
QSSNLQSHEIINTNFGGDSGDAFEAHEWR	2	3	1	LOC_Os08g34060.4	DUF1336 domain containing protein, expressed	T13(Phospho)	3326.42	1.36292e+07	0	0		2.65009e+07	1.43869e+07							2.57817e-08	S(2): 1.2; S(3): 98.8; S(7): 0.0; T(13): 0.0; S(19): 0.0	0	2.498e-10	343.39																						High	48.71	0.00264798	High
QVAHAPAELNSPR	74	2	1	LOC_Os04g58280.2	stem-specific protein TSJT1, putative, expressed	S11(Phospho)	1469.69	1.64676e+09	1.1173e+09	3.18324e+09	1.682e+09	1.57814e+09	1.68014e+09	1.18047e+09	1.07723e+09	1.09421e+09	3.41551e+09	3.02878e+09	3.10542e+09	1	S(11): 100.0	0	2.703e-05	452.622	High	52.53	0.00073383	High	51.23	0.000989909	High	51.79	0.000877106	High	40.79	0.0109546	High	42.71	0.00706448	High	46.95	0.00265718	High	38.61	0.0181516	High	53.34	0.00062658	High
QVGGGDASAGEEAQEYK	15	1	1	LOC_Os04g38750.1	plastid-specific 30S ribosomal protein 3, chloroplast precursor, putative, expressed	S8(Phospho)	1775.71	2.48713e+07	5.79368e+07	3.76466e+07	2.48671e+07	2.47347e+07	2.5012e+07	5.83715e+07	5.84432e+07	5.69957e+07	4.02152e+07	3.47009e+07	3.80236e+07	1	S(8): 100.0; Y(16): 0.0	0	1.074e-09	407.389	High	121.22	5.84819e-11	High	88.16	1.20143e-07	High	84.89	2.55093e-07	High	75.39	2.27063e-06	High	76.33	1.83104e-06	High	73.33	3.37006e-06	High	52.41	0.000475943	High	98.91	1.00638e-08	High
QVNNVEGVTEQLTDNEK	14	2	1	LOC_Os01g67250.2	Rad21 / Rec8 like protein, putative, expressed	T13(Phospho)	1996.89	0	4.6272e+07	0				6.16154e+07	4.41118e+07	3.30886e+07				1	T(9): 0.0; T(13): 100.0	0	1.494e-07	407.976	High	37.32	0.0283312	High	31.19	0.118459	High	44.04	0.00618904	High	40.74	0.0129663	High	49.55	0.0017292	High	53.93	0.000621833	High	25.54		High	27.87
QVSVQTPTPVPAR	17	1	1	LOC_Os01g51640.1	expressed protein	S3(Phospho)	1459.73	5.55546e+07	1.20574e+07	0	5.75467e+07	5.95924e+07	4.95246e+07		2.50607e+07	1.11115e+07	5.31277e+07			1	S(3): 100.0; T(6): 0.0; T(8): 0.0	0	0.0001438	254.192	High	57.14	0.000215318	High	61.97	6.98229e-05	High	62.03	6.88335e-05				High	57.65	0.000188626	High	49.49	0.001259	High	46.76	0.00236061	High	58.57	0.000146779	High
QYSVLDAK	28	1	1	LOC_Os02g16620.1	reticulon domain containing protein, putative, expressed	S3(Phospho)	1003.45	1.52153e+08	4.74595e+08	3.3045e+08	1.5165e+08	1.5246e+08	1.52349e+08	5.35856e+08	4.71743e+08	4.16187e+08	3.84656e+08	2.90139e+08	3.16556e+08	0.999999	Y(2): 0.0; S(3): 100.0	0	0.01041	206.41	High	32.73	0.0291734	High	33.55	0.0237565	High	33.31	0.0255963	High	64.47	1.96143e-05	High	64.62	1.88794e-05	High	57.91	8.70527e-05	High	45.02	0.00172811	High	44.54	0.00192831	High
RADSDDEDDPVESFLR	25	1	1	LOC_Os03g19530.1	DEAD-box ATP-dependent RNA helicase, putative, expressed	S4(Phospho)	1945.78	1.12561e+08	6.21346e+07	1.64949e+08	171271305		1.66411e+08		9.85326e+07	8.78712e+07	2.68842e+08	2.26004e+08		1	S(4): 100.0; S(13): 0.0	0	1.171e-06	442.056	High	56.67	0.000207528	High	27.68	0.165063	High	37.16	0.0184809	High	10.35		High	41.14	0.00757593	High	36.97	0.0194581	High	41.53	0.00715376	High	32.95		High
RAEAQPAPPPAAADSS	32	1	1	LOC_Os03g15940.1	OsWLIM2 - LIM domain protein, putative actin-binding protein and transcription factor, expressed	S16(Phospho)	1615.71	8.16414e+07	0	4.2935e+07	8.36866e+07	5.4564e+07	1.06674e+08				6.51698e+07	6.36353e+07		0.5	S(15): 50.0; S(16): 50.0	0	4.938e-07	463.992	High	42.33	0.00695023	High	41.54	0.00807726	High	52.09	0.000714736										High	38.94	0.0147046	High	50.17	0.00114576	High
RASLDASDAGFSSGR	11	1	1	LOC_Os11g42420.2	nuclear pore protein 84/107 containing protein, expressed	S3(Phospho)	1576.68	4.82605e+07	0	0	7.26596e+07		7.21221e+07	3.43468e+07				4.16859e+07		1	S(3): 100.0; S(7): 0.0; S(12): 0.0; S(13): 0.0	0	1.929e-05	386.691	High	29.62	0.117166							High	39.36	0.0124221				High	27.73		High	52.57	0.000587381	High	22		High
RASLSGAGALQGGGGAMQTVAK	17	4	1	LOC_Os11g02610.3	BTBN20 - Bric-a-Brac, Tramtrack, Broad Complex BTB domain with non-phototropic hypocotyl 3 NPH3 and coiled-coil domains, expressed	S3(Phospho)	2068	1.71117e+08	0	0	1.78231e+08	1.61136e+08	1.73983e+08							1	S(3): 100.0; S(5): 0.0; T(19): 0.0	0	2.312e-11	519.854																			High	37.29	0.0320177	High	55.53	0.000481845	High
RASSEAWSAGER	27	1	1	LOC_Os03g12450.1	nucleoporin, putative, expressed	S4(Phospho)	1386.58	7.25358e+07	0	8.09887e+07	1.10952e+08	1.06655e+08						1.27048e+08	1.15919e+08	0.999999	S(3): 0.0; S(4): 100.0; S(8): 0.0	0	0.001007	312.483	High	31.43	0.0621604	High	29.5	0.100533				High	22.29								High	41.85	0.00598594	High	43.25	0.00432224	High
REAAPTAAPVSPAASGGGGGQIWSATR	2	1	1	LOC_Os07g36200.1	eukaryotic translation initiation factor-related, putative, expressed	S11(Phospho)	2603.25	4.26779e+07	0	0		5.61407e+07	7.18931e+07							1	T(6): 0.0; S(11): 100.0; S(15): 0.0; S(24): 0.0; T(26): 0.0	0	5.058e-08	456.142																						High	37.37	0.0281993	High
REDSDDPEEEDPDER	48	2	1	LOC_Os10g06130.3	RNA recognition motif containing protein, expressed	S4(Phospho)	1912.68	2.11035e+08	3.81229e+08	1.85064e+08	2.19517e+08	2.07271e+08	2.06317e+08	3.80834e+08	3.65079e+08	3.97773e+08	1.92699e+08	1.75207e+08	1.87287e+08	1	S(4): 100.0	0	6.022e-06	525.897	High	52.61	0.000290313	High	34.48	0.0184998	High	33.2	0.0248648	High	51.33	0.000393503	High	46.83	0.00110489	High	50.22	0.000506197	High	51.83	0.000347429	High	48.45	0.000767316	High
REEASAAAAAAEAGTPR	19	2	1	LOC_Os02g48000.3	TBC domain containing protein, expressed	T15(Phospho)	1708.77	1.09356e+08	0	4.09972e+07	9.27806e+07	1.25946e+08	1.0934e+08					5.90915e+07	6.39e+07	1	S(5): 0.0; T(15): 100.0	0	1.56e-07	487.601	High	25.37	0.378394	High	32.19	0.078151	High	35.14	0.0415815										High	43.07	0.00654688	High	44.17	0.005082	High
RGGAAGDLDVFGAQASPGSTSR	13	1	1	LOC_Os03g10180.1	expressed protein	S16(Phospho)	2156.98	5.0684e+07	0	3.76708e+07		9.4282e+07	5.777e+07			3.10382e+07		5.25122e+07	6.05003e+07	0.999999	S(16): 100.0; S(19): 0.0; T(20): 0.0; S(21): 0.0	0	3.67e-10	413.68							High	38.38	0.0355259	High	24.64		High	33.86		High	46.17	0.00597947	High	19.36		High	42.1	0.0151497	High
RGGEGSPGAAAGK	21	2	1	LOC_Os06g43660.3	inorganic H+ pyrophosphatase, putative, expressed	S6(Phospho)	1194.53	3.2092e+07	1.89509e+08	1.22011e+08	1.33708e+07	3.92071e+07	4.36983e+07	1.88906e+08	1.72513e+08	2.07108e+08	9.15209e+07	1.27629e+08	1.46883e+08	1	S(6): 100.0	0	5.203e-06	443.36	High	60.71	6.82741e-05	High	26.96	0.163313	High	64.65	2.77985e-05	High	37.1	0.0156183	High	35.72	0.0217281	High	44.62	0.00277323	High	40.77	0.00669186	High	55.71	0.000218453	High
RGGGPMLGFDSSPGR	20	1	1	LOC_Os07g33630.1	HEAT repeat family protein, putative, expressed	S12(Phospho)	1570.69	8.774e+07	0	0	1.34209e+08		1.29011e+08							0.5	S(11): 50.0; S(12): 50.0	0	4.848e-05	300.878	High	24.09	0.518233	High	19.72	1.41697	High	13.94	5.38059				High	14.2					High	35.79	0.0358277	High	30.62		High
RGTTVYFPVGEPGPR	30	2	1	LOC_Os12g38640.2	expressed protein	T3(Phospho)	1712.82	5.47874e+07	0	0	48071492	4.7026e+07	6.92649e+07							0.999999	T(3): 100.0; T(4): 0.0; Y(6): 0.0	0	2.765e-06	388.595																			High	40.87	0.00944099	High	58.31	0.000170444	High
RHSFGEEELAYLPYK	6	1	1	LOC_Os02g53520.1	kinesin motor domain containing protein, putative, expressed	S3(Phospho)	1918.88	4.40002e+07	0	1.37403e+07	4.432e+07	4.55411e+07	4.21394e+07					1.91494e+07	2.20715e+07	1	S(3): 100.0; Y(11): 0.0; Y(14): 0.0	0	2.817e-06	536.323																			High	52	0.0011862	High	52.63	0.0010222	High
RHSISITSR	17	1	1	LOC_Os05g33620.1	expressed protein	S3(Phospho)	1136.56	1.18523e+08	0	0	9.49109e+07	1.1524e+08	1.45417e+08							1	S(3): 100.0; S(5): 0.0; T(7): 0.0; S(8): 0.0	0	0.002985	334.765										High	19.55								High	36.48	0.0178687	High	35.19	0.0242607	High
RHSPYSSAER	6	1	1	LOC_Os04g56630.1	transposon protein, putative, unclassified, expressed	S3(Phospho)	1269.54	4.91052e+06	0	0	5.8879e+06	8.84367e+06						1.7702e+07		1	S(3): 100.0; Y(5): 0.0; S(6): 0.0; S(7): 0.0	0	0.001911	179.949										High	29.33								High	33.13	0.0404934	High	33.5	0.0373427	High
RHSTGQSTPVNNDR	70	2	1	LOC_Os11g36430.2	zinc finger, C3HC4 type domain containing protein, expressed	S3(Phospho)	1648.72	2.58186e+08	0	1.4768e+08	2.3889e+08	2.69338e+08	2.66331e+08				2.26422e+08	2.16617e+08		0.999952	S(3): 100.0; T(4): 0.0; S(7): 0.0; T(8): 0.0	0	0.0006375	346.5	High	24.61	0.450586	High	38.98	0.0160685	High	38.75	0.0174291	High	29.78		High	29.85		High	33.33		High	46.83	0.00263307	High	50.56	0.00111548	High
RIPSGNTESAQPVYTVDSPPSSSQPQGNLNDR	49	3	1	LOC_Os09g35710.3	UBX domain-containing protein, putative, expressed	S18(Phospho)	3478.59	1.38927e+08	5.01041e+07	9.17358e+07	2.51742e+08	8.04266e+07	8.46139e+07	5.5536e+07	4.67499e+07	4.80264e+07	1.04074e+08	7.93139e+07	9.18192e+07	0.999714	S(4): 0.0; T(7): 0.0; S(9): 0.0; Y(14): 0.0; T(15): 0.0; S(18): 100.0; S(21): 0.0; S(22): 0.0; S(23): 0.0	0	6.314e-17	519.62	High	67.12	3.83228e-05	High	62.52	0.000109461	High	65.92	5.05832e-05	High	71.62	1.34804e-05	High	60.16	0.000189923	High	64.19	7.50319e-05	High	68.15	3.00246e-05	High	78.83	2.57516e-06	High
RKPASPPR	27	2	1	LOC_Os01g72890.2	transposon protein, putative, CACTA, En/Spm sub-class, expressed	S5(Phospho)	988.51	5.7546e+07	2.90991e+08	0		7.67198e+07	9.59183e+07	4.06641e+08	4.66332e+08				4.07814e+08	1	S(5): 100.0	0	0.007321	189.996				High	26.06	0.234488	High	30.33	0.092683	High	33.85	0.0391287	High	52.13	0.000581427	High	27.63		High	31.33		High	52.21	0.00056841	High
[truncated: 526 more rows]
[truncated: 3 more columns]

## Sheet: Table S2
Table S2. Homology comparison between ABA-induced DP proteins and SnRK2 target proteins in Arabidopsis.
[truncated: 155 more rows]

[truncated: 1 more sheets: Table S3 Cluster]
